# Supplementary material for: A minimal set of internal control genes for gene expression studies in head and neck squamous cell carcinoma
Source: PeerJ. 2018 Aug 14;6:e5207. doi: 10.7717/peerj.5207 (PMC6097490; doi:10.7717/peerj.5207)
Supplement: Supplemental Information 5 [file peerj-06-5207-s005.xlsx]

## Sheet: microarray&tcga_data
Supplementary Table 1: A larger set of genes common between the microarray data and RNA-seq data with high expression in both tumor and normal samples.
			in house microarray data (Krishnan et al., 2015 and Krishnan et al., 2016)																						TCGA Data
			Fold change																						1	2	3	4	5	6	7	8	9	10	11	12	13	14	15	16	17	18	19	20	21	22	23	24	25
Gene	minNormal	minTumor	OT2	OT3	OT14	OT24	OT35	OT39	OT44	OT1	OT5	OT6	BM5	OT11	OT12	OT17	OT19	OT22	OT26	BM13	OT51	OT52	OT54	AVG	TCGA-CV-6933-01	TCGA-CV-6933-11	TCGA-CV-6934-01	TCGA-CV-6934-11	TCGA-CV-6935-01	TCGA-CV-6935-11	TCGA-CV-6936-01	TCGA-CV-6936-11	TCGA-CV-6938-01	TCGA-CV-6938-11	TCGA-CV-6939-01	TCGA-CV-6939-11	TCGA-CV-6943-01	TCGA-CV-6943-11	TCGA-CV-6955-01	TCGA-CV-6955-11	TCGA-CV-6956-01	TCGA-CV-6956-11	TCGA-CV-6959-01	TCGA-CV-6959-11	TCGA-CV-6960-01	TCGA-CV-6960-11	TCGA-CV-6961-01	TCGA-CV-6961-11	TCGA-CV-6962-01
SUB1	8.04612	7.77988	0.949646	1.03588	1.0514	1.03198	0.907307	1.0134	0.96691	1.02495	1.08765	0.920666	0.79343	0.980592	1.04312	1.06307	0.927171	0.95736	1.02022	1.07719	1.00256	0.982097	1.05037	0.994618	44.2141	9.27935	46.8112	24.4617	33.4713	23.1801	56.3261	30.6163	67.3151	67.5525	95.6551	22.4584	43.9379	39.0638	32.6743	59.2835	87.8553	43.5942	82.0409	34.0785	45.7108	38.3664	69.88	37.4613	23.8719
TSEN34	8.61835	9.0881	0.945997	1.02619	0.97893	1.05199	1.08866	1.04684	1.01439	1.04826	1.01033	1.04412	0.99808	1.00881	1.03069	0.997754	0.939389	0.942111	0.999726	1.08382	1.01236	1.00017	0.933817	1.00964	57.7154	11.3716	47.892	64.4244	80.9115	29.8276	62.9385	38.0644	66.5257	50.8433	88.9982	17.2928	25.2372	37.6406	31.001	38.1755	43.2225	34.8777	50.7691	32.5094	64.2894	37.3495	61.3426	32.2854	68.7304
EIF2AK1	9.05514	8.34464	1.02853	1.03468	0.994335	1.02808	1.05393	1.08144	1.03413	1.04518	0.946958	1.07715	0.806566	1.02257	1.0603	0.999653	0.98167	1.05235	0.980521	1.03203	1.00954	1.02168	0.936778	1.01086	63.0738	20.3677	48.2319	48.9487	82.2756	26.1765	78.379	28.8347	43.7437	52.4332	84.2768	26.52	38.6495	27.5121	23.4845	37.3288	52.3794	27.2771	49.9432	33.838	61.6785	33.0377	65.9217	22.406	100.265
SDF2	8.45393	8.90827	1.01637	1.06563	0.976743	1.0372	1.11097	1.02617	1.03918	1.10632	1.0035	0.989423	1.16587	1.01745	1.02326	0.994348	1.00191	0.876425	1.02311	1.06964	1.00016	1.00002	1.0172	1.02671	72.0884	17.8396	59.6719	48.0415	46.0441	33.9559	54.1296	36.282	49.9243	52.2011	61.9748	24.0073	61.5264	35.458	26.8509	34.0969	60.8632	43.2936	50.2612	37.3738	74.3641	41.2878	59.6798	37.4034	66.4992
SBNO2	6.50878	7.14055	1.09873	1.17242	1.08394	1.09529	1.20767	1.05843	0.973458	1.50438	1.06178	1.27447	1.3444	1.08497	1.07593	0.981268	0.97722	1.17464	0.944945	1.12357	1.04049	0.92986	0.791846	1.09522	38.0333	5.84239	62.5706	90.8066	36.48	69.2242	59.6941	32.4524	62.16	63.8804	118.087	6.85058	70.0032	25.1208	29.1601	43.7721	30.7591	69.161	65.894	16.2615	84.3595	80.7628	90.8673	29.6953	24.1769
TMEM93	8.16227	8.37655	1.0386	1.03008	1.02092	0.996788	0.938947	1.09668	0.968888	1.02539	1.1267	1.0001	0.961346	1.04224	0.974947	1.05197	0.952726	0.957302	1.0659	0.978986	1.01526	1.00559	0.96805	1.01035	65.9302	12.1825	42.3995	49.9715	69.1198	29.2403	62.2051	43.4778	55.6151	35.7262	69.5662	37.6503	42.0196	27.0305	31.7778	28.5684	78.6086	38.0315	56.9025	31.0105	109.049	42.8456	43.2254	33.4838	87.3018
PCBD1	7.05246	7.21582	1.02316	0.953868	0.997354	0.952055	0.951175	0.951134	1.01538	1.00396	1.08602	0.91048	0.862677	0.992034	0.899888	0.989791	1.02052	0.978084	0.908526	0.947248	0.946196	1.03778	0.929675	0.969382	48.503	17.4809	32.4908	63.8118	122.249	35.6411	78.4364	42.1552	25.0545	43.2508	62.7403	40.9684	28.8346	30.4238	32.774	35.0242	47.9579	40.412	28.8864	32.3471	59.4702	54.844	27.3876	22.0923	77.9063
HNRNPH3	7.78295	7.516	1.05935	1.0282	0.979765	1.00102	0.888407	0.865771	0.937673	0.99106	1.07769	0.929982	1.01834	0.989999	0.985313	0.9759	0.953277	0.980534	0.980154	1.10068	0.933874	0.975631	0.785808	0.973258	59.7249	9.61029	61.5084	45.1383	62.1175	26.3781	50.0507	31.9532	61.4054	61.1287	118.865	29.3812	50.9446	36.2701	21.9635	32.8979	59.0005	61.3296	86.9713	41.5654	88.2557	68.9636	77.0307	21.7749	47.3563
C14orf1	5.67414	5.75623	1.03923	0.987973	0.985065	1.01631	1.02019	0.986025	1.01124	0.99328	1.01581	1.02105	1.00441	1.00671	1.01184	1.00618	0.964345	1.04707	1.02603	1.01545	1.01567	0.992177	0.977078	1.00682	61.3144	12.3947	86.0092	42.5612	25.6504	38.8156	48.5502	49.7072	50.4846	65.3788	35.0555	17.9318	40.0201	58.7773	50.1858	61.4947	76.1983	47.7263	56.0312	63.8569	61.3581	51.2421	77.118	36.2539	35.3093
PPPDE2	7.57621	7.55223	0.981913	1.02574	0.944638	1.04144	1.20879	1.08063	0.949718	0.908854	0.992864	0.955158	1.07328	1.00014	1.03965	1.02943	1.00783	1.02809	0.937474	1.01677	0.991825	1.02903	1.12468	1.01752	65.2367	7.14718	49.5355	32.274	60.7882	41.3712	55.5348	30.4239	87.469	52.0837	42.843	17.1506	51.5734	34.4181	42.0142	28.2097	66.063	44.5685	55.8088	34.3401	136.129	76.3092	55.0988	41.0716	73.5323
FNTA	8.11653	7.43973	0.953073	0.924271	0.986009	0.933859	1.07244	0.90071	0.918806	1.11251	1.18669	1.00706	1.2287	0.979813	0.945084	1.00744	1.01562	0.931977	0.99178	1.01141	0.99356	0.888501	0.924202	0.995882	26.3339	10.9666	63.4046	34.2647	69.6972	39.5712	81.6483	32.2285	72.3271	60.4967	76.2839	31.204	34.6844	44.8089	35.7948	46.2689	50.0606	55.4306	71.0139	43.3159	36.4421	60.8529	47.1201	32.3417	47.7512
B3GNT5	6.0393	6.55069	1.00051	1.03207	1.02729	1.26244	1.27604	1.15843	1.05798	1.07502	1.18862	1.03044	1.07647	1.28902	1.31312	1.03544	0.94745	1.03536	1.13207	1.40192	1.03076	0.962088	0.987721	1.11049	72.2889	2.14654	46.5432	40.4062	41.6202	33.9472	36.0018	74.4834	25.7282	38.2314	61.1602	2.96968	21.5444	42.431	22.6569	26.8548	57.7282	51.4579	82.667	11.38	39.8249	41.634	130.9	44.2991	62.5827
ASCC2	9.34194	9.20477	0.990183	0.928342	0.943451	0.95308	1.15073	1.07569	1.02154	1.00411	0.942541	1.13356	0.962027	1.02223	1.01333	0.999592	0.984957	1.00037	1.00484	1.01155	0.945588	0.962959	0.852884	0.995407	51.8787	11.4335	61.0355	48.5729	52.0564	69.5756	45.4378	43.4781	41.5312	41.5858	50.5926	24.6061	52.5927	45.5897	49.6534	38.8454	58.8975	53.4632	58.5433	41.9636	60.0783	74.3249	52.6262	33.4906	34.5307
LOC728643	6.94303	6.37208	0.960607	1.05622	0.95452	1.07758	1.13736	0.865803	1.05215	0.631099	1.08926	1.2702	0.975246	1.12453	1.15122	1.0882	1.25701	1.15519	0.855103	1.11861	1.0823	1.43523	1.25774	1.07596	25.9745	2.58881	50.657	17.3134	64.092	32.6628	32.4448	36.3087	55.7396	45.8587	67.0458	7.0939	40.1942	36.7803	69.6318	62.7219	109.581	51.4067	78.89	33.9963	16.6422	33.0929	64.9616	31.2349	23.5721
PLSCR3	9.54667	9.70244	1.00882	1.04724	0.991287	0.977118	1.07961	1.07834	1.1051	1.03465	0.957157	1.02359	0.88199	1.13883	1.09568	0.989548	1.0079	1.03542	1.07612	1.00084	1.0284	1.03454	0.804745	1.0189	81.6868	3.2027	80.4972	22.6432	50.3522	30.7975	32.2712	33.4741	43.8145	56.849	35.6338	17.5646	70.3182	25.9107	37.1128	49.2691	95.4571	35.3135	93.5844	30.699	129.387	49.1064	26.9584	39.3229	41.4528
GABARAPL1	8.29351	7.86423	1.09787	0.942644	1.06927	0.999016	0.829505	0.960786	0.910645	0.989462	0.973612	0.94777	1.05713	0.967601	0.862847	0.995901	0.881018	0.952227	0.962806	0.872004	0.987121	0.937017	0.883232	0.956166	60.7381	38.3119	80.8423	66.2709	78.4349	18.2532	27.0272	36.8699	14.4807	57.7794	73.296	73.5677	31.8259	25.4746	11.1552	23.9911	32.3308	27.6845	39.096	31.8612	41.3411	13.8766	80.105	12.5693	153.567
AZIN1	8.05813	7.83096	1.02529	1.02676	0.99627	0.995157	1.06051	0.9215	1.00269	1.04694	1.05284	0.88673	1.04308	0.978461	1.07152	1.03378	0.969924	0.966135	1.0089	1.10488	1.03867	0.989769	0.915299	1.00643	35.9423	15.2613	78.2781	65.6847	79.7694	27.8304	70.9042	23.042	71.7086	46.1718	96.3541	25.1195	51.5345	44.6801	21.9183	48.2411	54.687	27.9814	83.9937	34.1123	66.5858	69.303	45.5092	31.8626	94.09
TES	6.05313	6.36721	1.00482	1.02465	0.997113	1.10988	1.07071	1.00539	1.09346	0.865852	1.10415	1.0576	1.20313	1.10525	1.12438	0.972706	1.04534	1.11459	1.02939	1.19116	1.07326	0.987892	0.891397	1.05105	42.2026	9.16056	67.8759	38.123	66.377	20.3375	71.8473	33.4261	51.7139	32.7977	69.3978	12.1832	51.1148	38.3655	21.8358	32.309	82.0451	40.6037	123.904	17.4185	36.9979	29.6302	49.1505	22.4816	29.153
EMG1	7.95277	7.93781	0.984062	1.11342	0.95764	1.03085	1.0307	1.06457	1.05979	1.03966	1.12794	0.992825	1.06647	1.03657	1.01313	0.996148	0.939691	0.908961	1.03278	1.02064	1.02589	0.757322	0.89981	1.00471	71.8767	10.812	28.1734	44.0726	30.0436	30.1398	40.8237	34.2822	60.2974	36.5962	46.1764	17.1692	30.5515	25.6258	26.6102	29.2913	72.9029	32.72	61.8407	25.9009	91.5425	58.8787	56.2892	30.435	80.6894
BOLA3	8.71464	8.69984	1.05292	1.03752	0.990806	1.04219	1.0013	1.10338	0.998302	1.05704	1.03723	0.978428	1.01841	0.992053	0.943201	0.998001	1.00056	0.952117	1.01793	0.939256	0.992816	1.01605	1.07215	1.01151	66.5419	18.1085	63.4933	29.3862	34.2324	19.3086	51.4489	24.1774	53.3645	39.9764	55.148	53.3417	36.1613	27.2144	13.9293	22.0847	66.7112	39.5985	54.5317	28.5762	70.5482	36.8648	53.227	25.232	114.986
ARHGEF1	6.725	6.80046	1.13915	1.03895	1.00871	1.04627	1.03534	0.963607	0.956671	0.917742	1.05296	1.01644	1.18222	1.01764	1.05801	0.981516	1.07051	1.06281	0.874145	1.09778	1.10718	1.10716	1.2691	1.04781	55.8804	5.33952	83.6031	31.5756	60.3915	35.4438	94.484	43.7281	68.3451	56.1335	74.3911	11.3846	77.0411	22.6227	30.6036	42.4726	75.8441	37.5012	57.9551	24.0286	39.9869	49.7205	71.9586	25.9428	41.466
CMIP	7.84287	8.49062	1.11386	1.04879	0.983182	1.10895	1.22187	1.13698	1.09479	1.04156	0.970757	1.11519	0.95092	1.09439	1.10147	1.01883	1.00085	1.07237	1.07562	1.08057	1.02622	1.01674	0.997696	1.06055	59.1063	2.84576	78.3976	54.3797	92.1478	36.495	85.9979	22.9186	48.0576	47.2889	93.3378	9.71726	46.7834	22.3638	31.1126	42.0191	52.2207	34.3333	74.1016	17.1226	91.4151	56.9692	131.678	21.0738	45.5996
PITRM1	7.8105	7.91709	1.00969	1.05067	1.04155	0.951351	0.99536	1.01192	0.964756	0.926365	1.02801	0.949888	1.21964	1.0748	0.99835	0.993854	1.02533	1.01801	0.891356	0.970908	0.99961	0.922273	0.812169	0.993136	44.6075	11.8139	42.5443	47.5276	64.3969	51.7007	49.7136	37.4177	76.2104	44.0073	56.2951	46.7631	37.1371	26.4808	53.9388	52.9889	53.1022	44.9273	63.7567	38.326	57.3925	50.3762	48.139	35.3762	36.6732
PNKD	6.4717	6.66004	1.13018	1.05995	1.03777	1.02408	1.03709	0.988557	0.961644	0.976951	1.20864	1.03569	1.18033	1.06779	1.00993	1.02033	1.14647	1.03973	1.22422	1.16089	1.09475	1.34862	1.36233	1.10076	68.4487	34.2615	57.7229	79.8175	76.9455	27.1854	50.3887	38.1765	57.7371	60.1657	88.6086	56.2047	36.308	28.7848	31.6354	41.8909	83.9055	37.6229	32.7069	43.6433	95.1745	28.6943	39.0595	21.5853	39.9815
NOP58	8.46199	8.87721	0.928613	1.08563	0.976071	1.0257	1.12067	0.936554	0.990003	0.953849	1.15715	1.02295	0.865638	1.08665	1.07809	1.03451	0.992658	1.13944	1.0354	1.05869	1.02345	1.02905	0.932332	1.02253	49.9686	6.0224	45.739	27.3303	61.1516	21.8953	65.3655	27.3476	90.8339	55.813	114.747	15.47	27.0486	34.6918	26.3457	41.1179	73.3627	44.299	49.0723	33.3952	103.65	63.9036	67.1323	32.9942	63.5409
MPZL1	7.21865	7.5919	1.05561	1.08094	1.04735	1.08111	1.11602	1.07037	1.12912	1.11669	0.890861	1.0656	0.754614	1.02169	1.13808	1.0023	1.00337	1.04426	1.03649	1.19172	1.05351	1.04973	0.911457	1.04099	68.307	14.2053	81.824	35.131	66.4366	34.7566	103.356	34.9875	68.0526	62.151	62.4758	29.1221	53.0736	25.8071	39.6937	55.0114	56.5705	43.7421	64.2278	22.9216	86.0036	52.7686	51.5493	23.9296	38.0568
TRAF3IP2	7.26391	6.9412	1.06602	1.05643	0.947268	1.00563	1.09865	1.18318	1.06688	1.10018	1.29585	1.06131	1.26203	1.06424	1.00776	1.0317	0.943396	0.902272	1.0439	1.034	0.981721	0.738264	0.95959	1.04049	65.9626	10.7003	54.2229	35.7495	37.2003	42.3207	48.0725	29.969	62.5018	58.1982	53.7674	14.9931	48.3075	42.714	31.87	37.8357	63.9337	61.2356	84.9202	31.0225	81.4917	55.0198	60.6791	34.7056	62.6479
METTL5	8.56812	8.15617	0.988134	1.0251	0.984929	0.986322	0.990309	0.904972	1.0593	0.983981	1.0063	0.975325	0.942871	1.00803	0.996632	1.044	0.976522	1.073	0.977984	1.00287	1.02885	0.993049	0.973458	0.996283	66.8037	14.7832	63.2157	33.1374	93.6402	20.7831	52.7294	27.7064	63.8748	52.4158	58.6845	30.9299	27.162	31.7633	22.6435	33.7716	76.514	32.0122	48.1618	36.5174	87.569	35.8655	50.7186	28.3846	110.093
CARM1	9.62051	9.65327	0.988314	0.955057	1.01478	1.00181	0.985992	1.08616	1.02865	1.03172	0.912625	1.0233	0.942075	1.00799	0.942733	0.980645	1.05906	0.987722	0.980295	0.945072	1.00806	0.999966	1.00337	0.994543	102.388	6.32482	65.9763	34.1169	69.4701	46.8973	59.5671	41.0171	51.9573	43.1589	57.8258	40.881	45.1575	34.4227	36.2435	32.5813	65.4146	36.259	59.0628	34.5664	79.3967	64.9386	47.9162	31.8763	75.8434
C1orf116	6.35747	7.00845	0.908871	0.821462	0.732015	0.799281	1.41197	0.966831	0.988557	0.939321	1.04393	0.962948	0.880414	1.03573	1.00791	0.94387	1.03715	0.816556	0.967809	1.07674	0.962969	0.772216	1.10891	0.961213	14.6866	4.7047	14.5872	58.5427	15.2074	105.376	11.2084	66.1236	32.3334	29.5719	26.4276	8.75957	36.0286	110.362	35.8956	31.2746	69.4297	69.2033	37.4301	57.1328	25.2444	87.8197	24.9447	49.9549	9.11018
FBLIM1	6.02252	6.27462	1.00705	1.02598	1.01583	1.05072	1.06793	1.08371	1.0956	1.49602	1.23592	1.1352	0.974055	1.20589	1.19425	1.03603	1.13635	1.09376	0.981207	1.23799	1.16671	1.25085	1.2609	1.13105	56.0749	7.97661	80.7475	20.1588	26.3334	14.2542	54.7567	18.0458	125.582	34.177	41.1239	11.2193	59.9323	9.77999	26.4877	58.3913	42.6614	22.2237	108.708	9.44648	63.5513	33.6435	93.2067	27.3595	26.6569
MRPL38	8.81301	8.38153	0.976195	0.997326	1.01348	0.99595	0.914702	1.02166	0.95104	0.977058	0.966299	1.0066	0.938358	0.973662	0.899836	0.973347	1.00274	0.968058	0.983024	0.934564	1.00916	1.0083	0.923354	0.973082	47.4772	17.3469	48.7913	49.0383	39.3607	41.5182	64.0385	36.9605	44.1865	52.1849	65.3385	51.1403	38.375	29.0748	27.3631	30.6159	62.4823	48.6798	39.8528	35.0358	75.9643	53.2928	52.6262	29.2982	76.8132
YIPF2	6.30849	6.39563	1.04109	0.986789	0.982641	1.00593	1.01374	1.05789	1.03581	1.00053	1.07188	1.04291	0.905542	1.01594	1.04792	0.980668	1.07212	0.991331	0.89506	1.06535	1.01993	0.735386	0.932531	0.995286	84.6311	46.5326	73.4464	60.5289	49.2049	35.4533	58.3133	34.6143	41.8548	44.2297	48.2467	34.1296	49.7694	31.5929	36.0941	42.4275	50.6697	39.6256	51.4319	30.5947	113.982	45.0929	70.483	31.7217	58.9751
TBRG4	6.66084	6.93183	0.986769	1.05289	0.982123	1.0242	0.992274	1.16178	1.03419	1.09926	1.23537	1.2037	1.05656	1.07116	1.00175	1.01261	1.09927	1.03708	1.13208	0.984694	1.05773	1.01518	0.881486	1.05344	63.1158	5.78968	40.8832	34.918	57.1565	34.1714	120.481	27.3154	57.9796	33.571	54.0082	37.5666	32.8024	25.8248	24.4893	28.3327	93.2242	42.5423	64.7384	30.1244	80.8243	51.8924	59.5465	29.1324	105.241
PDHB	10.3857	9.52728	0.959	0.969207	1.04296	0.877099	0.803486	0.938759	0.943368	1.02088	0.976111	0.969058	0.787891	0.926123	0.930294	1.01927	0.934922	0.934168	1.07124	0.960899	0.988638	0.997351	0.948828	0.952359	38.1161	17.8671	50.76	44.4908	30.5598	49.4334	31.7751	61.3761	52.3814	85.5593	58.255	92.3742	41.4906	40.7134	32.2633	40.0692	28.2733	47.9568	37.0907	56.4609	36.6911	61.6279	46.0707	37.3612	58.4543
PLSCR1	6.61172	6.56634	0.964519	1.19009	1.0062	1.06215	1.19487	1.00909	1.06599	0.879925	1.10407	0.944911	1.39048	1.08282	1.12196	1.06728	1.06968	1.3454	0.961913	1.08814	1.00838	1.00183	0.964596	1.07258	53.9594	4.2531	70.2739	50.1935	26.557	39.8034	81.5454	24.071	143.095	38.1643	104.713	15.3052	110.283	29.4495	40.2975	52.8681	64.0609	25.5058	83.7315	17.5827	85.6626	49.2019	75.3358	13.6421	15.1896
SLC44A1	8.92462	9.43125	0.905225	1.10677	0.927263	1.10711	1.1298	1.10288	1.03911	1.06392	1.02892	1.0439	0.983364	1.0465	1.10324	1.06599	0.924358	1.05305	1.04652	1.10855	0.990973	0.973878	0.906501	1.03132	117.246	3.29249	92.7194	20.1304	81.0708	22.5578	33.2956	23.357	52.8007	53.7211	72.8041	9.85235	57.3446	37.0784	29.5984	33.6043	77.3443	27.5359	46.9906	40.9826	60.799	40.7984	70.0568	32.2178	121.2
CCM2	7.46216	7.92253	1.08262	1.09868	1.04498	1.06169	0.99363	1.06283	1.12672	1.21374	1.07589	1.17369	1.13552	1.02019	1.03056	1.01376	1.09364	1.12642	0.995872	1.01476	1.10062	0.993529	0.836699	1.06172	39.5091	7.44034	73.5978	26.1729	36.0668	19.3661	82.7273	28.6312	88.6169	40.4329	55.537	24.8644	68.692	13.405	19.7675	34.6523	75.7059	24.7354	72.6491	22.3647	84.5771	25.5459	62.7759	16.5656	33.3977
HNRNPA3	6.89831	7.31124	1.05834	1.1089	0.999691	1.1435	1.10351	0.914319	1.06888	0.976238	1.01503	0.919207	1.14757	1.0169	0.988683	0.992063	0.992249	1.00991	0.844559	1.01475	0.979342	1.0445	1.15614	1.02354	112.822	6.60538	52.6728	42.7213	70.5906	31.9972	58.3782	44.4819	59.5275	55.8469	126.691	16.8616	46.9126	37.0787	35.8884	36.8532	62.776	47.3097	60.209	39.9611	77.7087	57.708	57.9074	25.2455	67.5594
DUSP6	7.91876	8.57279	1.01998	1.05223	1.04016	1.13422	1.1898	1.23494	1.05939	1.01508	0.997664	1.03952	0.933308	0.984672	1.0339	0.944023	1.01115	1.06689	1.02891	1.09854	1.10077	0.993055	1.03648	1.04832	67.7535	51.4405	71.745	25.3911	14.8766	14.1056	47.8309	31.0363	172.756	73.7626	84.9284	37.7426	51.327	13.8777	10.9318	34.3005	46.3393	80.4954	167.193	8.76675	110.842	9.09231	87.1777	53.7426	34.6046
MAPK6	8.70989	8.81058	0.999964	1.01724	0.970247	1.06649	1.14219	1.03573	1.14287	1.0235	1.09724	1.00589	0.840354	1.06439	1.10439	1.05731	0.944988	1.0151	1.08103	1.14025	1.02168	0.982712	1.12691	1.04193	49.6599	3.7825	55.5268	30.616	52.6173	37.0828	63.8928	40.861	39.3971	45.9272	74.2353	12.072	43.971	38.8245	44.8793	65.3168	83.2008	41.5366	93.5204	25.4604	32.5204	50.9269	35.1486	51.6443	49.9451
MRPL34	8.43821	8.11424	1.02469	0.914702	1.00296	0.995766	0.876278	0.891671	0.962828	0.987689	1.00524	0.925685	0.981824	0.972858	0.936013	1.01899	0.982955	0.980813	0.907758	0.943709	1.00583	0.992358	1.05801	0.969935	59.6894	23.4608	53.6223	44.6558	62.903	33.0461	57.5708	34.0201	46.6336	63.9664	74.2518	67.1729	35.9948	34.2067	23.1869	29.5663	40.0958	43.0145	32.2659	30.9244	76.6651	44.7846	32.4499	29.0882	78.985
OAZ2	7.83153	7.17995	1.07206	0.973646	0.96435	1.0306	0.828194	0.997009	0.979055	1.05838	1.13891	0.890936	1.35622	0.956657	1.02784	0.961501	0.981708	0.900035	0.928022	0.919846	1.03229	0.997681	1.04448	1.00188	47.3426	19.8631	99.7421	49.9491	49.0106	30.9635	65.2918	46.505	46.7978	71.4397	57.5398	81.7614	51.7103	39.5005	27.1309	41.2945	51.8859	34.821	51.8667	63.3571	31.6902	30.5606	74.6613	30.2664	45.5043
WBP11	8.38605	8.2768	0.984272	1.04851	0.993193	0.9762	0.994965	0.975438	0.980253	1.02829	0.958914	1.07715	0.986097	1.04297	0.949423	0.986116	0.938839	0.955035	1.06793	1.01234	1.01236	0.959069	0.790014	0.986542	80.323	15.6477	57.293	48.3778	49.9595	33.3204	29.786	38.6682	40.3468	52.6223	94.3063	37.0742	44.0647	34.73	29.3573	42.2786	58.6086	33.8751	81.2683	31.4997	51.8887	46.8205	79.4568	32.5162	61.6826
KIAA1191	8.57285	8.44518	0.958761	0.922927	0.973174	0.955864	1.04957	0.94964	0.988276	1.0126	1.06769	0.955907	0.894983	1.01572	1.02902	1.01044	0.957261	0.97452	0.991711	1.0049	0.939863	1.00307	1.05314	0.986144	34.2659	26.4892	73.1932	60.188	74.0927	45.1447	59.3626	38.1616	44.3007	71.542	90.08	26.2627	40.6855	57.1508	30.8807	43.0542	34.7896	40.8419	37.9898	45.8877	41.2283	71.3184	62.9726	43.9554	113.877
KIAA0664	7.2886	7.17707	0.922805	1.04193	0.982906	0.964311	0.964593	1.17278	0.852544	0.897616	1.03049	1.0912	0.705539	0.999181	0.911701	1.01606	1.06405	0.995211	1.1903	0.93013	0.963184	1.1494	0.697997	0.978283	47.5135	7.93704	37.9808	51.586	39.856	59.9693	76.852	41.6936	55.4911	54.1224	67.7832	50.5932	32.3954	39.3625	35.0986	41.5918	79.2059	43.496	44.3835	40.4997	62.8902	107.469	25.19	36.2416	85.0741
RPL7L1	9.48122	9.37295	0.980278	0.95687	1.00919	0.996131	1.01705	1.04647	0.951843	0.97369	0.978178	0.97675	1.11184	1.03703	0.999893	0.97323	1.08859	1.01506	0.882724	0.989654	0.969039	1.07442	1.18191	1.00999	59.7475	10.581	76.7167	38.7518	53.1926	36.9055	67.2551	36.336	57.4165	61.5935	88.8926	25.2491	40.3812	41.2588	30.2266	44.5238	57.9869	38.7976	97.4377	32.8416	40.8389	63.3144	70.6492	35.6994	61.9327
CCNB1	6.52609	6.87221	1.06547	1.16319	0.933145	1.10246	1.09803	1.19532	1.12924	0.921614	1.02256	1.27173	0.937369	1.10949	1.23012	1.08528	0.953742	0.964262	1.06124	1.41435	0.990869	1.05373	1.44046	1.10208	42.1492	0.627197	54.0437	14.405	45.4893	44.2962	109.188	27.7068	94.2353	27.5954	102.867	1.52334	40.8828	26.3444	36.4238	54.6297	74.0785	20.7229	76.8495	31.8728	63.9144	55.0274	144.527	20.229	71.3968
EIF2S2	5.60605	6.24437	0.967014	1.00665	0.982839	0.998022	0.990389	0.962142	1.03228	0.997073	1.20819	0.819641	0.924073	1.0103	1.0034	1.03841	0.913286	0.977506	1.33273	0.936465	1.03043	0.740232	1.03769	0.995655	49.1126	8.05194	48.8528	33.9329	56.4824	32.8017	91.5749	34.2953	73.6999	43.3185	134.148	19.5555	31.317	33.4823	27.5374	32.46	71.5062	30.1903	382.124	31.7342	106.674	53.356	50.2739	34.0999	124.168
DGCR6L	7.92264	7.99639	0.976538	0.920408	1.01264	0.899711	0.801896	1.06815	0.913842	1.0052	0.910127	1.03025	0.968028	0.963472	0.914147	0.972465	0.969031	0.999939	0.937847	0.957285	0.958337	1.04112	0.885672	0.957433	86.2243	18.5605	53.3587	37.765	52.2153	31.089	182.862	38.5508	47.3764	67.0548	40.6234	34.2945	50.6113	31.664	25.1748	30.6776	38.2004	31.4655	36.3265	38.3266	70.0749	33.7403	58.2972	29.161	39.6576
SH3GLB2	9.03536	8.17351	0.899067	0.846854	0.880406	0.888296	1.10524	0.996582	0.946929	0.96908	0.869002	1.04919	0.890957	1.00163	0.977951	0.994469	1.02074	1.00644	0.964272	0.916711	0.948475	0.912579	0.640389	0.939298	44.5484	15.9779	30.8316	68.0704	47.816	62.1322	48.7753	80.6999	36.8026	53.8748	72.8882	20.6024	28.6267	49.7864	73.3015	44.2735	58.5124	30.104	30.7687	41.2583	44.0545	54.7672	36.5526	49.7461	68.0761
GTF2F1	8.27427	8.29613	0.958502	1.05294	0.983646	1.02297	1.05356	1.04563	1.01148	1.07111	0.973508	0.94349	0.992576	1.03583	1.03176	1.0081	0.933194	0.996473	1.01268	1.04219	1.01565	1.02329	1.04476	1.01206	43.0641	15.2415	66.3406	65.6871	59.2506	49.3172	67.692	46.3792	53.3158	55.0414	78.7655	28.5913	55.5074	35.0273	39.3829	44.2939	57.3373	45.1989	60.2303	33.9787	82.0745	52.3998	48.081	36.2737	78.8396
DUOX1	6.33057	6.55386	0.795693	0.805543	0.801814	0.799758	1.33401	1.0476	0.913667	0.710399	0.980384	0.962085	0.79022	1.05603	1.13007	1.00955	1.15636	1.09877	0.785984	1.04365	0.932516	1.04679	0.806198	0.952718	20.3301	2.76889	19.7965	81.0136	18.1728	120.299	28.2927	55.3635	72.1255	41.3831	46.1404	1.27225	74.5109	91.8021	77.9095	78.204	27.1406	26.6217	19.7184	72.1578	11.8531	136.487	9.73866	56.8233	18.5156
GLRX5	10.7582	10.5615	0.976839	0.975329	1.00893	0.985948	0.916426	1.0584	0.998159	1.03085	0.96563	1.00671	0.907977	0.974287	0.963913	1.0161	0.950783	0.968765	1.0198	0.943437	0.991327	0.99093	0.976074	0.98222	61.0061	10.0863	80.4039	30.6163	33.7752	26.06	49.5079	35.853	48.1558	67.556	41.8156	71.4317	39.0214	32.745	24.5481	31.9818	55.9462	38.169	43.6986	36.9333	74.5801	36.9373	50.4662	29.1483	56.7088
ROD1	8.89527	10.114	0.947958	1.04071	0.951596	1.02409	1.24635	1.00116	1.06222	1.03387	0.943676	1.03348	0.806348	1.0248	1.10893	1.02358	0.950463	1.01493	1.08527	1.10028	1.00483	1.00152	1.01743	1.02017	58.3131	6.13974	68.9708	43.4516	48.6282	49.0218	57.1992	46.9218	72.1354	48.936	147.808	8.51801	50.6037	49.9261	45.0181	61.1947	57.635	35.6975	62.4658	40.1309	56.6631	70.1439	66.3422	32.3109	64.7308
UNC45A	7.56163	7.36173	0.957328	0.940421	0.970176	1.01354	1.03646	1.0696	1.0346	0.992814	1.06462	1.01582	1.05747	1.03878	1.10444	1.00546	1.04655	0.964377	0.94325	1.06858	1.01723	1.04156	1.10445	1.02322	47.6086	13.6845	49.1353	37.8613	64.8929	42.3013	62.3025	38.2758	44.5124	54.6145	55.5737	15.1107	47.0736	37.0657	42.9969	41.3591	63.6493	44.0296	56.7311	45.8632	83.8021	53.2881	49.0664	34.6877	137.482
FCER1G	6.91469	8.25601	1.2713	1.24985	1.15113	1.3588	1.25396	0.935301	1.0712	1.05756	0.913052	0.952483	1.01811	0.92184	1.07398	1.03971	0.954686	0.995779	1.05729	1.09381	1.0305	1.03679	1.06982	1.07176	185.594	4.6834	199.101	16.6769	43.6111	23.1308	77.9984	71.0957	204.523	67.7832	111.265	20.0724	165.571	19.821	34.7158	35.7903	7.17188	22.6739	80.8286	22.4948	21.0388	33.048	78.328	10.6162	23.4697
ZBTB7B	6.49583	6.54034	1.00599	0.991721	0.996112	0.957988	0.986979	1.00689	1.01581	1.02491	0.935438	0.953822	1.2171	1.10134	1.04995	1.01054	1.07309	1.14337	0.918131	1.11666	0.941275	0.829825	1.07973	1.01698	36.0012	10.2703	30.3451	73.2114	54.4679	89.9325	89.2085	62.0339	25.2563	93.8417	50.4474	11.0657	44.486	64.23	66.9621	51.5854	40.0101	52.4319	35.7549	65.7938	19.1661	93.6889	47.1452	39.0316	41.5193
SRI	6.96502	6.41025	0.957576	0.959852	1.01478	0.969597	0.956219	0.920349	0.995747	0.984389	1.11947	0.788596	0.763676	0.984857	1.04482	1.00562	0.918897	0.944495	0.958366	1.05552	0.990337	0.994569	0.990316	0.967526	220.582	8.19358	48.7343	85.9739	57.5473	29.8277	76.7206	28.5833	50.9028	43.7295	70.5501	17.466	33.6599	25.2178	20.0245	37.8242	47.5512	27.7896	59.8595	22.911	245.739	47.2405	56.2169	29.7692	83.6994
GBP2	9.54978	8.74916	0.846171	1.12379	1.07337	0.916164	1.09518	1.0132	0.980373	0.996761	0.924328	1.02813	0.91631	0.920697	0.948547	1.07538	0.94502	0.951928	1.05338	0.913842	0.906815	1.00586	0.914188	0.978543	28.7981	3.90549	107.219	83.8097	16.3324	34.6954	57.9973	57.543	129.201	99.9641	68.5374	48.3491	162.888	45.154	95.3164	83.4077	12.2602	112.203	87.9066	59.2743	18.7465	50.256	93.3776	38.1098	4.22467
ANP32A	6.22266	6.26537	0.958195	0.999695	1.00925	1.06812	1.03333	1.00987	1.0341	0.996032	1.04067	0.938702	1.14715	1.02193	0.951493	1.02555	0.98308	0.986494	0.909311	0.971216	1.02826	1.02914	0.982412	1.0059	59.2933	11.4391	72.1751	58.1062	68.3825	26.9636	44.7966	34.2759	67.0104	55.493	78.3902	31.0009	43.7299	30.1974	16.4023	31.3579	82.5197	30.3946	76.6457	35.1531	42.8721	54.2631	91.2896	19.2933	71.9751
CPSF3L	7.11267	7.07761	1.02436	1.02402	0.981522	0.990978	0.963314	1.04576	0.955057	0.903728	1.02726	0.914992	1.06729	0.997285	0.972857	0.982765	1.03215	1.02285	0.942421	0.938218	1.03437	1.08764	0.997294	0.99553	33.9205	15.3066	58.7076	57.1036	39.8875	38.662	81.4734	43.1443	52.8324	52.9981	66.1294	24.7413	48.0038	32.4536	30.981	37.0301	71.955	37.8788	61.4627	36.6519	67.4059	59.0386	53.6099	32.0127	51.2649
TPD52	6.34171	6.22414	0.908945	0.966481	1.0017	0.964678	1.08217	0.994315	1.02522	0.904383	0.964208	1.05663	0.85369	0.929474	1.06731	0.970428	0.943085	1.07121	1.07588	0.990605	0.905535	0.915694	0.89892	0.975741	37.844	34.8597	53.0319	51.0263	76.1868	39.6376	57.2786	37.0644	22.1284	39.4074	88.555	22.8516	37.7291	53.1717	51.154	49.2823	37.0645	40.3866	32.1323	46.8778	37.4123	54.2223	46.2085	39.6559	112.512
SLC27A4	5.67114	5.6635	1.01559	0.989323	0.978684	0.963131	0.984162	1.06103	0.977392	1.02552	1.06614	0.993855	0.984461	1.00153	1.00469	0.999094	1.01744	1.10065	1.13222	1.0527	0.988321	1.04066	0.94555	1.01534	40.0067	3.57958	43.2507	19.7005	25.8859	88.4588	63.3295	68.4629	55.16	62.8703	27.2397	6.86766	39.0442	46.6692	91.6131	67.98	75.5228	55.6901	28.0808	48.4678	91.5599	90.5751	29.0905	48.338	62.8192
SNW1	7.90167	7.77222	1.07621	1.00975	0.975617	1.07312	1.00554	0.932317	1.00788	1.00706	1.08284	0.977232	1.28638	1.05887	1.02196	1.01292	0.979224	1.09329	0.924388	1.02872	1.0171	1.02836	0.90905	1.02418	48.4854	10.1762	88.8725	44.3575	35.2107	32.3462	52.1464	33.446	59.7117	52.8954	64.7447	27.6737	45.7779	38.3903	29.7249	41.5749	64.8793	41.1219	62.5033	33.9499	85.3067	49.5201	72.569	27.41	56.141
RARS	9.6697	9.6174	0.925685	0.98936	0.977751	0.932801	1.05462	1.06547	1.06851	1.05483	0.969786	0.99276	0.938226	0.952524	1.03256	1.03736	1.03156	1.00215	1.04197	1.00678	0.983814	0.998234	0.959197	1.00076	28.8286	13.519	54.3846	41.4394	46.2434	42.2683	57.9932	44.6665	89.0721	60.5915	80.5809	23.211	48.9606	54.3498	47.0961	54.7064	41.6383	45.7875	39.2552	51.0151	53.5386	65.178	67.0457	48.4223	60.0374
C19orf28	6.36944	6.79379	1.06947	1.09433	1.03187	1.12789	1.15513	1.18803	1.14633	1.50905	1.14761	1.09803	1.39976	1.1047	1.11031	1.03948	1.11563	1.01148	1.16816	1.10216	1.07503	1.73092	1.1845	1.1719	116.153	13.5614	77.3618	42.0241	52.0155	21.8283	221.783	38.6709	108.157	53.0652	70.3088	11.062	60.8136	20.0307	27.2711	31.3746	44.576	25.7834	96.2877	15.1313	112.187	47.2387	75.6425	22.1601	50.3961
BTG1	10.6951	10.5845	0.963986	1.0829	1.04433	1.13773	0.950212	0.8931	1.04594	1.03018	0.987417	1.0032	0.909201	0.989965	1.01445	0.985401	0.95301	0.969339	1.03407	1.11657	1.02576	1.00936	1.00003	1.00696	64.1986	8.61335	109.815	57.495	49.5122	38.6323	40.0899	24.075	74.2651	86.7351	168.598	18.6211	56.8389	16.9461	30.8302	41.3615	30.5658	32.0965	53.9352	33.7753	13.1455	42.516	89.6064	27.0325	70.4216
ZFAND6	7.02581	7.18005	1.0883	0.989784	0.953978	0.997401	1.02035	0.873891	1.00419	1.39274	1.09736	0.971133	1.33216	1.01073	0.971745	0.991882	1.12014	1.08686	0.913262	0.939304	0.997498	0.724185	0.795126	1.01295	57.5836	12.719	56.4453	45.1907	54.3953	35.0753	54.5339	33.2265	59.0915	61.5755	90.8599	44.0046	46.9942	51.4668	31.0593	36.3933	65.3756	36.6177	56.1294	41.0834	37.0029	33.3911	86.537	25.5578	94.6257
PPCS	8.42786	8.43028	0.97557	0.976315	0.970678	0.972742	1.06387	1.00466	0.966335	1.00999	0.993642	0.992543	0.765069	0.985328	1.03955	1.02673	0.935261	0.997791	1.09222	1.08124	1.00989	0.995033	0.987235	0.992461	43.4905	24.7066	53.3288	45.4239	27.3341	41.2815	64.8112	40.3359	52.2093	76.3756	67.6934	33.4779	42.4194	49.1961	42.6764	43.795	76.0827	28.81	43.6664	41.2811	42.2783	49.6266	61.7494	38.1105	52.0282
H2AFX	6.19252	6.18376	1.05388	1.04765	0.968572	1.09768	1.08401	0.920339	0.999814	1.02305	1.33443	0.907516	0.851738	1.04727	1.04367	1.02753	0.822773	1.19357	0.926056	1.11058	1.04445	1.04114	0.923345	1.02234	42.5895	1.79777	38.6962	32.1633	29.9142	33.5195	37.3382	35.7037	94.0683	39.7035	67.2231	6.49093	54.4359	27.7161	44.4662	39.523	73.5621	46.7495	62.9694	24.3672	147.341	56.1712	39.0372	22.9223	98.5723
BTBD6	9.00991	8.97998	0.968638	0.948326	0.975409	0.953404	0.882822	1.00143	1.01612	1.03328	0.941154	0.974329	1.00152	0.981042	0.92741	0.998779	1.01516	0.996285	0.942336	0.918001	1.00569	0.989442	0.977631	0.973724	62.6256	20.3188	76.7842	34.5192	25.4354	39.4265	56.8384	37.5752	42.3826	57.8015	45.5317	81.0514	40.4803	33.2501	28.3953	34.4913	61.5645	39.6142	71.1514	55.6911	69.7796	40.1466	75.2741	29.4694	32.9404
PTPN12	8.25038	8.55246	1.10107	1.04656	1.03485	1.0545	1.01856	1.04733	1.05507	0.990372	1.0463	0.966951	0.904712	1.07899	1.10656	1.02544	0.969077	1.02036	1.13345	1.11141	1.07948	0.99956	1.00205	1.03774	112.732	3.07288	77.897	19.5386	54.1926	22.4251	66.8352	35.277	94.5839	63.287	98.9516	11.4517	57.2052	47.3009	25.3916	39.2085	46.5111	41.889	90.3969	28.7627	121.629	40.1946	76.4383	18.9883	93.0994
PPP2R2A	9.42567	9.21426	0.896018	0.93212	0.950899	0.923179	0.960894	0.962548	0.943742	1.02416	0.90589	1.06537	0.954915	1.00611	0.942314	0.987591	0.969687	0.950169	1.03315	0.9652	0.885135	0.944027	0.938666	0.959132	36.4743	5.22479	47.2679	57.7177	39.5336	67.4668	24.8023	45.9369	53.1582	48.0868	72.7186	24.1581	29.5657	107.437	39.9884	43.8476	38.4608	61.4165	41.0906	63.4813	38.8865	73.2875	68.7306	43.4944	53.3186
SMAGP	6.30885	6.29257	0.863128	0.904706	0.847385	0.832052	1.17838	0.879836	0.928438	0.7407	0.974788	0.863193	0.759445	1.00692	1.01803	1.01677	1.0586	0.921515	0.866839	0.921051	0.897973	0.989419	1.09543	0.931648	30.8539	2.76933	28.5703	47.0482	17.5602	110.927	23.6194	80.0738	41.6025	49.1533	38.6702	4.52136	26.7776	97.6398	45.0242	26.4906	24.6712	64.1432	29.0447	66.5499	26.4997	125.863	38.4502	51.2063	78.2536
MPV17	7.92285	7.34952	1.09865	1.0182	1.00244	1.02622	1.02507	1.02786	1.02529	1.05997	0.899995	1.16976	1.11671	1.03463	1.04068	1.00836	0.936312	0.942243	1.02834	0.962622	0.985279	0.703567	1.0475	1.0076	90.9238	14.3444	68.7784	41.1853	60.6683	28.5371	69.5956	41.2541	61.2794	68.6021	70.4019	26.4977	58.7219	31.5414	31.6278	32.4927	85.2096	36.734	64.6764	33.3322	115.942	47.4925	57.1532	31.6931	51.7875
COL12A1	5.9313	5.97587	1.05945	1.17381	1.17393	1.36329	0.97302	1.174	1.25134	1.02568	1.00404	1.1983	0.927777	1.12142	1.13754	1.08745	0.977983	1.22364	1.12735	1.27556	1.11237	1.05456	0.870776	1.11016	36.1759	0.882099	209.099	1.83696	71.0113	8.11627	35.7022	21.3542	24.9053	38.1933	45.8509	5.76891	235.882	1.24942	2.11586	21.0213	29.8795	1.15807	126.662	3.04519	28.8225	7.99986	46.2307	2.6307	13.8025
TP53TG1	6.15455	6.28575	0.973361	0.984356	0.970479	0.961678	1.04614	0.966795	0.990295	1.03403	0.981435	1.00952	0.951691	1.04874	1.08138	1.00789	0.954795	0.970571	0.922508	0.99317	0.943423	1.01793	0.817853	0.982288	296.79	6.45807	31.9182	51.7142	59.1782	28.9932	65.3815	32.851	50.6649	62.6412	47.7906	21.605	32.0852	38.4007	22.6855	25.8827	45.5242	39.6218	18.5128	30.6134	288.687	36.4939	46.824	26.7893	64.243
VPS37B	7.86375	8.44651	1.08447	0.910934	0.913935	0.957628	1.20325	1.00946	1.07411	0.95733	0.956382	1.08157	1.01577	1.03625	1.01114	0.924264	1.03386	0.958535	0.978506	1.04111	1.02191	0.91073	0.907384	0.999454	44.6215	12.646	22.828	71.4548	12.4734	71.88	30.1807	77.9398	45.9306	32.3401	61.315	14.4752	30.4754	79.5283	33.4174	38.1713	55.941	36.5941	76.6044	17.4277	90.0394	62.7268	41.7724	42.6023	65.9926
ANO1	6.54961	6.47837	1.15544	1.25084	0.981967	1.44515	1.21655	1.2171	1.11705	1.47821	1.07777	1.24281	0.663746	0.965729	1.15816	0.987758	0.885292	1.44485	0.936953	1.07265	1.14179	1.00177	0.772687	1.10544	68.4874	42.3851	128.083	14.8682	419.234	3.17694	165.686	12.1097	29.505	15.3283	37.7957	14.3925	31.6348	3.61059	8.43054	34.9866	155.519	2.68645	59.0767	5.12827	100.45	0.983817	19.3286	1.65994	2.94972
RAB18	6.96049	7.10273	0.994618	0.981248	1.00151	1.00004	1.0015	1.03103	1.01586	1.25096	0.978038	0.962959	0.824465	1.12185	1.13774	1.00698	0.880867	1.09306	1.01666	1.15942	0.932293	0.899783	0.884409	1.00835	89.9593	10.6611	101.649	34.1641	94.4239	40.8355	50.244	41.2904	90.7745	67.7197	85.4116	32.3058	58.5345	49.6519	72.825	51.8395	50.2612	35.7724	51.891	41.015	62.5133	58.9812	31.6642	41.8017	41.1353
AMD1	7.80709	8.35223	0.947449	1.02789	0.938109	1.05475	1.10226	0.980337	1.0622	1.00949	1.07009	0.950817	1.01256	1.05415	1.03336	1.00636	0.936891	1.05774	1.01713	1.07999	1.00068	0.976266	0.977041	1.01407	47.2474	8.49832	45.031	34.1161	32.1478	54.565	36.7825	49.4326	50.027	47.2344	79.1146	12.3877	37.4756	71.3633	41.3143	60.7919	46.0055	43.9503	54.4007	31.7228	64.4263	103.379	43.5385	61.3972	49.5337
ABCF3	5.70628	6.45148	1.00376	0.996316	1.00488	1.05889	0.944186	1.09805	0.988684	1.40651	1.10298	1.13314	1.2244	1.05231	0.969079	1.02529	1.14074	1.02494	1.02501	0.903433	1.03796	1.39189	0.919811	1.06916	65.9187	13.842	57.8987	38.0649	40.9176	31.338	72.561	33.3744	36.6424	38.9606	53.5306	33.0592	37.9091	24.1771	27.6653	29.5647	45.6808	27.9249	47.6087	24.0752	57.7067	37.7717	99.3091	24.559	78.2865
EIF5	7.20577	6.73495	0.996972	0.960887	0.975591	0.944343	1.04392	0.917618	1.0134	1.03302	1.15839	0.999118	1.24054	1.01356	0.98778	1.00426	1.03959	1.16243	0.968221	0.956981	1.02004	0.910369	1.06352	1.01955	49.4874	20.4569	51.9098	18.9702	34.8116	31.4992	39.9176	30.6895	37.5105	50.5719	57.1973	36.2923	40.0735	49.8233	30.6655	53.8135	49.5896	25.828	72.9958	43.2763	55.292	51.2411	54.7501	39.3551	54.5876
TARDBP	6.87379	6.60078	1.09036	0.947903	1.01489	0.98916	0.935249	0.994047	0.903557	0.888656	0.876654	0.99656	1.28323	0.973873	0.982722	0.980865	1.10934	1.18572	0.88838	0.934515	1.0126	1.08791	0.817326	0.994929	51.6187	9.44074	53.2407	43.793	39.4342	36.4258	59.0289	43.0583	65.0523	53.3369	106.962	20.7232	46.6548	43.4979	33.6173	44.4557	71.5758	47.8299	68.5484	40.2791	78.3297	60.8648	76.3655	31.8938	58.1645
SORBS3	6.60348	6.62914	1.03693	0.950802	1.01083	0.975332	0.909206	1.00353	0.914738	0.931961	1.00155	0.865119	0.840942	1.03891	0.940286	0.978289	0.90438	0.998155	0.914682	0.819317	1.01187	1.06074	0.823878	0.949116	58.097	19.834	106.73	65.5918	70.3011	32.4108	25.9246	39.6469	43.7562	84.3229	90.6154	56.0095	53.2038	18.782	22.3667	47.5552	66.8281	16.5379	41.2957	30.7005	46.1828	29.5083	55.1277	16.0406	60.9733
ATG3	7.57512	7.70828	0.982139	1.02597	0.977788	1.01258	1.01758	0.951101	1.05317	0.951019	1.01934	0.993175	1.23426	1.0298	1.05738	1.03789	1.0155	1.04024	0.926088	1.07333	0.983136	1.05318	1.09378	1.02516	51.771	11.4034	62.0418	43.7235	78.2812	39.5327	109.88	41.7597	57.1643	63.8007	100.343	21.1793	52.5829	43.8534	39.9648	45.9481	58.4032	40.1371	67.2133	38.4469	52.3407	57.5168	74.1716	43.0179	61.2329
LSM2	9.46123	9.18422	0.980623	1.03715	0.982138	0.970722	1.06143	0.966273	0.98458	1.06062	0.999012	0.980903	1.02383	1.06132	1.00342	1.0017	0.982549	0.994825	0.912001	1.01739	1.01288	1.01249	1.02932	1.00358	87.5645	7.34586	61.3314	39.8203	101.366	35.8416	69.896	36.425	65.2834	51.6737	77.8039	19.0229	42.7711	33.8887	29.2115	32.1834	67.463	34.3735	67.6546	37.7879	40.1233	50.5542	78.3308	41.8536	60.8931
GYS1	6.3108	6.39864	1.0432	0.947304	1.02864	0.911327	0.857994	1.03372	1.01932	1.13244	1.07523	1.13888	0.942987	1.02281	0.875169	1.01048	1.00722	1.06299	0.963375	0.917398	1.00117	1.05119	0.860174	0.995382	29.2391	5.20506	41.6618	30.9784	50.6434	38.2321	51.6299	38.4935	56.2586	41.4653	36.235	161.323	45.7756	28.7723	39.5799	41.3659	45.065	55.6412	59.911	47.5198	34.9995	40.0638	70.9283	30.7104	61.8208
DUSP14	6.31729	7.22089	1.0347	0.98756	0.871359	1.17922	1.25793	1.18572	1.10649	1.10339	1.213	1.13298	0.905526	1.145	1.10319	1.04103	0.953556	1.10608	1.30472	1.15782	1.02771	0.839584	0.95676	1.07682	59.1013	4.34242	86.2286	39.9118	69.9601	11.0472	19.2146	34.168	34.0689	62.8195	63.3367	9.05192	75.4349	36.8809	27.6785	66.8861	93.1042	23.7908	61.9833	58.051	103.624	15.2966	34.8668	36.0643	86.6823
ANAPC13	9.81095	9.64624	0.983029	0.98064	1.02536	0.951796	1.03631	1.03382	1.06533	1.01846	1.09553	0.938077	0.862061	1.00014	0.988259	1.02501	0.932441	0.988716	1.04786	1.06748	1.03733	1.00771	0.929247	1.0007	44.7587	21.6521	62.125	40.1592	63.3647	22.3674	72.5656	31.5726	51.6739	58.4738	74.4123	45.9063	41.4859	31.4439	28.121	38.3037	54.7876	30.3111	45.4696	34.2151	89.2202	40.4993	51.5378	25.5613	95.5096
CIZ1	5.90938	5.98195	0.952281	0.968596	1.01461	1.01495	0.965554	1.056	0.978026	0.854416	0.914499	0.908864	0.739965	1.01441	0.980074	1.00502	1.07844	1.09558	0.920874	0.932596	1.0422	0.916078	0.763622	0.957936	63.4958	16.849	61.6071	42.6908	69.8923	39.7933	84.1938	40.3549	45.0683	53.3469	74.7804	34.3184	51.095	32.1661	28.1642	36.2938	75.5121	34.8829	76.3336	37.4465	67.3489	43.8295	67.2276	24.167	106.744
E2F4	8.32868	6.55319	1.05033	1.05151	1.00349	1.08457	1.07008	1.10674	1.01495	1.02597	1.00318	1.11403	1.0936	1.08457	1.0581	0.968839	0.687716	1.12951	1.08961	1.12662	1.06733	0.990296	0.677295	1.02373	60.4653	6.64808	71.5436	34.2389	55.7576	35.0585	96.3577	34.7504	40.9131	45.9452	81.1236	14.2993	39.3085	29.6037	28.4255	33.2852	89.2934	39.5954	82.9686	25.9835	89.803	65.6389	80.6356	33.1371	59.8665
ARFGAP2	5.73896	5.88768	1.01925	1.01978	0.987168	0.914381	0.975564	1.0261	1.01458	1.0011	0.904983	1.00583	0.972158	1.0009	0.945718	0.996967	1.0471	1.0601	1.03009	0.881058	1.00233	0.971094	0.942878	0.986625	34.2423	20.7307	46.9181	45.7224	40.344	48.6714	68.4241	46.4609	83.4986	69.6556	80.3003	39.5226	54.9343	41.7867	35.2556	45.6215	71.2813	49.1755	73.9392	51.6239	60.2889	51.2887	50.7274	35.8276	55.9171
HSD17B4	9.17734	8.65135	0.910521	0.941108	0.973426	0.888083	0.925358	0.979962	0.966602	0.924841	0.962937	0.955682	1.04946	0.962632	0.96927	1.02263	1.03256	1.01147	0.919037	0.986325	0.933371	1.0396	0.853541	0.962305	66.4772	21.8501	48.4477	50.3124	61.6217	64.4518	46.0366	58.6581	52.4287	96.6106	95.615	29.1187	44.831	62.9788	60.8414	51.7281	27.5239	74.849	30.1792	55.1022	37.4236	72.1741	69.1826	39.6488	35.1087
MKRN1	10.171	9.84471	0.99344	0.956505	0.985362	0.971013	1.00049	0.982626	0.983314	1.02164	0.948799	1.0322	0.926106	0.968279	0.970804	0.989901	0.933259	0.974858	1.06594	1.01974	1.00031	0.997166	1.03433	0.988385	45.6288	22.512	53.5736	76.0648	42.1923	37.1826	45.6782	34.4759	51.9501	56.7984	85.2327	41.3842	49.9803	38.6571	39.0162	48.7529	69.0734	36.5182	60.2865	40.6743	28.495	44.8151	35.4737	23.9661	108.452
UBE2E3	7.27179	6.9165	1.021	0.953819	0.988872	0.969348	1.01429	0.946902	1.04923	0.915592	1.0293	0.909271	0.858188	1.03842	1.04477	1.01827	0.984351	1.08135	0.862731	1.0194	1.01061	1.03264	0.967676	0.986478	61.7394	12.0992	72.1067	29.643	102.975	26.8864	55.6739	38.1804	49.9221	49.0552	63.3548	27.0578	43.3535	34.9144	29.0497	33.666	64.2465	28.7458	69.2624	38.1528	64.003	37.8818	53.406	31.6455	65.639
DYNC1H1	8.76715	8.00121	0.994732	1.02135	1.07217	1.04835	0.988152	1.0979	1.00638	0.890534	0.983907	1.04863	1.05362	1.07454	1.01654	1.01499	1.07447	1.04257	0.97986	0.966223	1.02434	0.882979	0.794238	1.00364	75.1631	8.30228	103.253	42.2127	60.4884	36.8575	58.746	35.5085	38.9663	49.6114	55.1281	37.5622	62.753	25.7791	40.8814	52.2373	56.4233	29.6617	80.2954	39.523	55.4928	57.0014	82.4958	18.3257	54.8934
TNFAIP1	8.1917	8.92212	0.927042	1.10936	1.03918	1.01107	1.12092	1.07251	1.08532	1.04701	1.03341	1.05658	0.977195	1.04386	1.06273	1.06133	0.967611	0.980439	1.10716	1.07174	1.06077	0.964098	0.927306	1.0346	65.334	3.65692	60.9184	29.8882	51.1495	35.8069	110.448	34.159	78.21	61.4748	95.3473	13.9162	62.9511	38.5998	31.8352	38.9904	61.9238	33.3757	76.0746	32.3079	50.5301	44.1892	68.712	53.2607	56.4527
OVCA2	5.90497	5.77648	0.965249	0.989687	1.00802	0.982397	1.03977	0.981547	0.989762	1.04858	1.19208	1.06937	0.840497	1.13176	1.21015	1.05747	1.11021	1.04795	0.937591	1.05339	1.05876	1.16754	1.22286	1.0526	60.5825	12.7533	57.0843	39.4988	47.7368	49.2382	62.451	47.7089	64.083	52.0961	74.1847	23.147	56.1309	43.2534	48.2898	42.1045	55.4824	36.8102	57.0354	46.294	75.4981	44.0993	29.6474	40.2431	91.3924
WDR13	7.93774	8.02766	1.08598	0.924139	1.02481	0.931166	0.911585	1.02572	0.964386	0.97995	0.877097	1.05469	0.968051	0.969489	0.985707	0.947672	0.974442	1.00527	1.01418	1.0118	0.9818	1.01069	0.793319	0.973427	55.0324	22.3042	62.1357	67.3531	37.11	43.9756	58.1626	47.2824	42.4361	64.5882	55.8689	65.5511	42.7804	33.9637	32.756	42.5681	55.2184	38.288	38.9033	37.4133	100.583	41.0408	64.3097	29.2188	80.3039
BNIP3	8.82292	7.72828	1.02966	0.828699	1.01273	1.01039	0.699316	1.17895	0.983136	0.976812	1.06925	0.94063	0.949706	1.02843	0.938679	1.06225	0.935392	0.915567	1.05035	0.893137	0.863272	0.964341	1.08044	0.971959	57.8927	26.6469	66.2898	18.32	33.2719	20.4624	30.6402	25.9927	37.3166	40.1012	11.7089	52.6678	28.844	46.3122	50.6615	39.7367	80.3873	32.7753	148.791	37.0855	29.8631	9.95211	89.4349	67.4976	162.706
PLVAP	7.71629	7.57838	1.00397	1.02479	1.11034	1.08074	0.972597	1.00649	0.982128	1.03099	0.946102	1.22334	0.897091	0.978118	0.948506	1.01017	0.967557	1.01759	1.05374	0.950027	1.02037	1.01293	0.982732	1.01049	43.6447	16.0334	217.687	4.67979	76.584	20.7593	62.7305	78.5349	27.0798	139.676	112.756	48.8562	110.765	15.3966	19.0134	42.3896	40.0379	23.3914	58.7099	27.2819	60.7642	18.853	94.2173	14.656	106.363
VEGFA	6.41116	6.45798	1.14084	1.00263	1.00509	1.08812	1.01362	1.06834	1.03078	0.640554	1.0408	1.39789	1.55552	1.0811	0.868671	1.02348	1.24678	0.949414	1.18099	0.878155	1.02796	1.65726	1.03173	1.09189	118.978	4.64152	77.7008	83.632	68.044	26.6134	215.328	24.503	25.5284	23.0374	89.3472	19.9232	10.0471	16.5404	5.70903	11.6657	75.4907	29.5699	95.7916	9.10812	50.3781	45.4875	335.638	18.4181	77.9128
PITPNB	7.16925	7.37682	0.987109	1.05495	0.987403	1.04382	1.12689	1.029	1.05523	1.20766	1.04993	1.00245	0.968284	1.06995	1.08128	1.03899	0.938154	0.916798	1.15822	1.15583	1.02315	1.00832	0.883188	1.03746	66.8123	4.97002	79.8832	31.0873	43.6055	33.755	66.0167	34.2854	94.4925	47.364	98.8847	12.0196	63.3421	51.5411	29.7806	41.1088	63.3828	37.2978	63.7803	33.8856	85.2723	65.0618	63.9668	32.6962	35.6024
PLK2	5.94822	6.39962	1.02658	1.01256	0.917548	0.946815	1.1919	1.20666	1.05757	1.13907	1.27474	1.0395	0.915554	1.0384	1.08294	1.00354	0.987813	1.10829	1.26926	1.1248	0.99007	0.949708	0.909703	1.05681	26.5106	5.96258	48.3169	23.4194	50.4782	44.8277	124.992	70.1213	97.153	103.034	37.187	10.958	72.882	35.5877	63.7663	67.6886	32.9604	27.7422	65.2162	29.6646	9.42389	34.0174	56.2955	81.1153	22.0113
LARP1	7.28376	7.14098	0.998675	0.995653	0.98506	0.951657	1.02703	1.06013	1.02108	0.920901	0.977121	1.09099	0.768235	0.9542	1.02203	1.03465	1.03651	1.01876	1.0716	0.952846	1.01058	0.958624	0.896274	0.988219	42.2027	17.8627	65.0659	51.5138	70.8375	40.1282	111.09	42.3808	72.4701	54.5667	84.268	25.0265	53.834	36.2004	45.2485	55.0612	44.8284	35.7808	62.2982	37.7043	56.2264	90.4711	77.8171	27.2565	89.6052
MED8	6.63744	7.09796	1.06137	0.994139	0.983494	1.01438	1.14451	1.00267	1.05841	0.943406	1.02962	0.973253	0.921709	1.08101	1.12361	1.02734	1.04473	1.05548	1.00973	1.08698	1.03332	0.957583	1.04029	1.02795	56.3958	11.9873	52.4074	27.8323	30.2453	49.8874	51.9425	54.1369	53.3548	59.573	51.7052	15.3695	52.7805	53.5534	53.3627	55.9993	66.2412	45.8812	54.8037	45.3665	73.6023	55.4403	50.749	45.9765	55.8904
TMEM30A	6.95966	6.83274	1.00483	0.997073	1.06042	1.04022	0.96726	0.981934	0.981911	1.30892	0.913002	1.08087	0.844366	0.970888	0.980667	0.978103	0.919539	1.10001	1.00032	1.12026	0.974926	0.760592	0.833909	0.991429	73.2979	17.0032	81.9621	48.8097	54.209	40.0724	48.1707	35.8205	52.9673	50.4219	163.494	28.8215	63.1581	34.3536	32.9206	59.262	47.2148	37.9469	63.3201	24.8441	74.7958	54.3052	104.328	21.9094	46.0931
DCTD	7.99685	7.46348	1.00012	1.02993	1.00533	0.933303	1.03237	0.986291	1.03802	1.06055	1.0376	0.955575	0.800373	0.982894	1.05115	1.02103	0.911946	0.963221	1.0201	1.14838	1.01977	0.872463	1.02089	0.994824	49.8557	14.1446	68.1709	48.2003	44.6409	43.8996	171.714	40.5285	78.4171	56.9133	91.2061	20.2316	52.8652	28.7993	30.3621	43.5455	54.6968	33.0159	73.4396	29.5274	98.193	76.5247	73.958	27.4891	57.129
FIBP	7.74999	8.02513	1.03222	1.00864	1.01084	0.984296	0.984356	1.16424	1.00969	1.03761	0.979866	1.07808	1.01475	1.06036	1.01919	0.960675	1.00366	1.01886	1.01315	0.975057	0.968677	0.990368	0.917277	1.01104	106.776	10.2937	91.1486	41.3007	80.6943	29.6911	69.3103	33.4036	50.6367	57.8255	84.6826	35.1015	51.0958	31.6247	29.4371	29.7168	88.1632	29.8903	68.1492	44.721	112.388	37.4478	59.9889	36.5413	50.0522
DNPEP	7.20874	7.21474	0.947213	1.00513	0.983548	0.967714	0.957702	1.07659	0.936878	0.884498	1.01665	0.987092	0.837862	1.01732	0.982917	1.02852	0.900338	0.928683	1.04497	1.00676	0.987423	1.15326	0.878927	0.977619	50.9647	12.5003	51.9808	43.6164	53.0535	34.7633	86.6836	42.0936	72.3329	61.413	74.5655	32.8576	48.0095	34.0444	41.8898	47.884	63.3121	41.5157	58.3233	40.28	87.5255	47.2312	59.3287	36.205	75.2018
DCUN1D5	8.15129	8.22399	1.11593	1.07096	0.994002	1.08786	1.13584	0.950683	1.09672	1.08573	1.13198	1.03322	1.02793	1.08436	1.03762	1.08398	0.964401	1.01389	1.13979	1.20976	1.03232	0.991918	1.10869	1.06655	24.0033	4.73975	40.766	17.2615	31.8342	20.0508	23.1296	19.875	39.5966	27.7339	33.4298	10.7302	33.6044	22.6	22.7579	27.0913	50.4527	22.7613	69.2099	18.5831	122.426	38.309	27.3191	31.2802	62.4204
NACA2	6.59901	6.37997	0.963751	0.946972	0.921517	0.997456	1.01266	0.843264	0.969127	1.04671	1.11454	0.932701	1.02461	1.01669	1.02772	1.01039	0.998258	1.01885	0.861311	1.00934	0.996619	0.871676	0.961333	0.978356	41.7419	16.2026	53.2858	44.8758	70.2003	44.2696	37.8482	46.0835	60.653	76.6441	56.6365	24.8301	37.5392	62.587	40.3449	49.2463	66.9283	49.7587	55.6417	60.6097	26.5284	53.8554	46.1451	37.3436	88.5794
NCOA7	8.28893	8.88849	0.896856	1.19207	0.995031	1.05273	1.17172	0.902466	0.972564	1.02127	1.15147	0.953729	0.881886	1.01822	0.899988	0.956921	0.915501	0.954556	0.989729	1.28642	0.991995	0.96988	1.07173	1.01175	33.9268	8.41675	31.4418	92.5089	7.4002	76.5082	72.7229	108.541	40.4822	110.77	186.747	13.9673	31.1028	22.772	49.5048	71.6246	20.2293	79.2697	28.1494	10.4708	42.0925	84.709	102.746	45.8977	16.5753
TMEM159	7.19103	7.06336	0.866081	0.946763	0.887954	1.00426	0.944504	1.01559	1.01825	0.915673	0.9593	0.96191	1.05744	1.06823	0.949209	0.976724	0.864016	1.13278	0.926289	0.887848	0.875174	0.912497	0.745195	0.948366	54.8847	10.7679	47.2045	33.6424	95.2379	53.6738	38.1702	22.6336	47.3032	71.9967	62.958	54.885	42.6939	63.045	25.8012	31.8613	80.4381	63.7277	44.0483	65.122	83.283	50.2128	47.1034	22.2389	102.539
SNX5	7.29957	7.06427	1.0594	1.0637	1.01856	1.08927	0.994083	0.926571	1.02245	0.97162	1.18711	0.862813	0.990371	0.957846	0.977388	1.00518	1.02527	0.921065	0.993275	1.01904	1.04846	0.710335	0.955309	0.990434	61.5315	11.5477	63.674	28.8881	44.906	27.5902	57.323	33.7119	85.7004	66.5057	82.1373	27.7021	45.2697	31.4866	29.927	45.6003	92.2926	25.461	84.4245	28.4672	66.7487	47.5782	61.6235	32.5112	197.064
NPM3	7.41335	7.79491	0.984944	1.13867	0.967033	1.01782	1.1187	1.12159	0.999275	0.993967	1.1367	0.924022	1.01157	1.11244	1.0868	1.04308	0.903743	0.917731	1.16354	1.0842	1.05159	0.931159	0.955985	1.03164	75.7682	6.00838	57.6176	33.201	68.7551	34.2861	64.4916	36.5122	70.087	60.33	46.7318	11.0503	33.7857	30.9032	22.7705	29.2964	117.144	33.7549	64.4147	24.0883	65.1672	69.9589	29.279	50.2374	53.3325
FASTK	7.73846	7.69506	1.01004	0.964351	1.0275	0.958163	0.901282	1.02097	0.937518	1.03058	0.952415	1.06678	1.01502	0.993922	0.942689	0.976993	1.05997	1.08591	0.952833	0.892655	1.03074	1.05128	0.725897	0.980834	36.7593	16.0725	47.2889	39.6324	41.5264	42.4573	69.523	44.0969	47.0225	53.1957	59.3823	71.5281	38.2219	32.062	33.8524	33.7488	43.1424	48.6989	44.4294	40.7919	36.0322	47.2441	27.8855	31.5785	76.4203
MAX	6.48396	6.388	0.992533	0.975709	0.95743	0.991989	1.01906	0.965174	1.02455	0.925226	0.98568	0.936944	1.19459	0.990856	0.990194	1.01639	1.02945	1.01296	0.860237	0.927225	0.984012	1.0407	1.07307	0.994951	60.501	10.5443	107.421	63.4706	34.3489	48.0279	45.8818	56.5194	74.447	57.5473	72.7688	19.46	70.4284	56.7167	57.6212	52.7839	34.3326	54.1705	43.6742	46.2278	75.3824	74.5335	37.0013	36.7764	37.6138
ECE1	6.1026	6.35184	1.01416	1.03042	1.016	1.14605	1.04113	1.05076	1.03857	0.607495	1.06384	0.997427	1.16923	1.03466	1.03169	0.975722	1.08067	1.23949	1.0451	1.12034	1.09975	1.15033	1.07255	1.04883	60.0736	7.80861	129.596	109.992	84.1944	17.7525	39.8496	23.5079	22.6276	62.0067	235.039	32.0115	62.1411	7.75126	11.4995	38.0773	38.0172	11.4639	65.9777	14.3838	99.7334	25.3568	99.6307	6.99872	57.5052
UBAC1	9.27214	9.41138	0.940625	0.997297	1.06647	0.93493	0.883746	1.06932	0.986738	1.04814	0.97518	0.943716	0.803815	0.950562	0.87803	1.07559	0.948453	0.936108	1.04598	0.902702	0.974801	1.00471	0.875839	0.963941	57.0523	8.75714	48.9874	60.8091	50.0978	35.3618	71.1954	38.4451	65.1619	54.4085	111.422	92.5416	36.4949	31.1439	24.0925	32.8928	64.1124	53.4955	59.4216	48.5741	75.0029	45.5683	73.7967	32.4785	66.3371
AGAP3	6.42268	6.89813	1.04592	1.01102	1.00251	1.04493	1.00593	1.10217	1.04648	0.893355	0.967625	1.00305	1.07137	1.03408	0.968708	1.03119	1.0328	1.10662	0.940657	0.9776	1.04952	1.05806	0.858483	1.012	50.4309	9.67784	57.1978	47.8132	26.0383	38.7949	74.8752	48.375	66.1787	66.9622	65.3784	17.5727	50.0136	33.9623	33.8697	37.2989	114.586	49.5935	75.1437	39.4602	43.6854	53.3807	27.2403	29.8996	54.2668
CDC123	7.70823	7.8287	0.952697	1.04086	0.98288	1.03736	1.08245	0.964393	1.04829	0.9281	0.927151	0.97243	0.887917	1.07409	1.10464	1.02435	0.995002	0.99933	1.09154	1.07328	0.968497	1.06797	0.770172	0.999686	62.1639	8.18351	75.6187	38.2713	71.7447	40.157	33.9458	40.3604	79.2586	60.8774	81.2626	20.1502	43.2517	41.1425	35.2202	44.1195	77.2752	37.8065	63.1401	37.0526	102.691	57.3087	40.868	44.7516	45.5847
FAM102A	6.52743	6.88115	1.01305	0.960951	0.924463	1.07244	1.20595	0.931652	0.958836	0.948361	0.969199	0.968605	0.874357	0.981475	0.99383	0.989483	1.05777	1.02366	0.867682	1.04517	0.945032	1.03363	0.949535	0.986435	90.7126	9.48912	52.1645	132.34	115.548	80.5626	25.8261	61.6177	18.6768	59.8823	81.2396	12.3651	52.9071	63.1967	77.5002	46.8134	35.135	42.3668	21.3559	32.933	53.4665	61.3937	15.9235	33.2366	90.7224
SUPT16H	7.25008	8.33417	0.982369	1.05894	1.01925	1.04311	1.04694	1.03372	1.02419	1.4783	1.23447	0.96808	1.12809	1.0419	0.9282	1.01428	0.961727	0.909771	1.01443	0.992699	1.02054	1.02142	1.12959	1.0501	52.5678	8.4786	71.2137	35.5039	28.8469	25.9949	74.2122	33.2051	62.104	51.9439	70.9996	20.2059	48.9638	30.7537	27.4554	42.6588	68.035	29.5154	66.5046	30.4114	76.4544	51.1074	79.5343	24.8508	92.8948
PRSS3	6.3588	5.67723	0.738522	0.984985	0.809333	0.799122	1.41298	0.867262	0.715548	0.569607	1.18798	0.770437	0.666606	0.9397	1.35827	1.04746	1.14006	0.878434	0.743306	1.30624	0.982961	0.604341	0.929802	0.926331	14.2965	0.0309265	45.9418	25.6928	0.0789526	234.262	0.951911	94.489	0.158255	35.8726	3.90245	0.338125	29.0422	143.628	25.6501	34.1354	77.3843	49.896	1.73491	81.4382	35.2422	133.978	2.81474	123.693	31.3673
DVL1	6.07311	6.20727	0.984732	0.967401	1.0168	0.999634	0.963439	1.03705	1.01686	0.662197	0.996387	0.8757	0.836594	1.03666	1.0319	1.03232	1.02676	1.16939	0.767476	0.886674	1.12726	1.03189	0.817678	0.965942	26.7406	27.2402	56.7039	49.2126	36.5655	50.2618	78.9806	50.8735	47.2112	36.3651	36.0746	64.4125	40.7673	33.1485	33.9655	30.3604	111.876	44.8821	93.2376	43.0115	54.6869	63.8795	76.2333	34.759	37.561
SCGB1A1	5.76205	5.97929	1.04193	0.956128	1.02443	1.00352	2.1952	0.951065	1.00609	0.906113	0.939082	0.929655	1.25772	0.996703	0.941697	1.43613	1.47121	0.730749	0.903249	0.979751	1.52298	0.639842	1.48506	1.1104	8.68544	3.70427	1.86887	947.175	6.7224	20.2554	0.0927662	0.958715	2.54968	0.12764	24.2988	0	0	0.104581	3.24721	1433.48	0.136769	0.221079	0.207605	0.224543	2.08587	9.88565	0.292197	0.0992335	11.9119
RAB3D	6.02831	5.87606	0.942081	1.04285	0.983531	1.00816	1.02346	0.984179	1.03615	0.980719	0.995356	1.07216	1.04557	1.05089	1.16204	0.956928	1.1236	1.01197	0.853356	1.15849	0.992135	1.00895	0.969425	1.01914	103.74	21.0228	23.0166	34.737	42.0085	67.8059	57.5537	54.6046	60.7663	62.4536	38.492	15.6923	39.4021	49.8911	79.9998	86.0462	83.5851	52.1132	48.9252	51.1312	150.396	98.148	35.7929	42.1319	90.6396
IL1F9	6.26037	6.84463	1.04295	1.27972	0.736454	0.893906	1.54283	1.08499	1.01857	1.146	1.05524	1.1297	1.0255	1.057	1.18971	1.08541	1.09718	0.975254	0.813727	1.28469	1.00657	1.16055	1.06667	1.0806	230.41	0.0294281	8.75572	0.666963	6.4317	4.31962	25.7953	1.2085	11.1433	25.8457	10.341	0	20.7321	40.2309	45.66	127.461	66.7727	397.081	45.7893	65.3036	578.057	0.759285	2.9248	26.2515	0.238515
POLR2K	6.30376	6.38096	1.04667	1.04281	1.02969	1.06279	1.03963	1.0864	1.01225	1.00019	1.05806	0.953432	0.851743	1.03261	1.06101	1.03009	0.939725	1.02626	0.984584	1.10282	1.08188	1.00914	0.942521	1.01878	45.2816	15.0337	80.9833	40.6553	61.1152	23.9357	96.4222	30.9795	97.4585	63.6122	117.024	26.895	53.8534	33.8457	26.0009	40.5808	52.3249	32.2975	53.2211	33.727	60.0554	39.3425	61.9053	31.0458	66.7472
PHC2	6.31242	6.68155	1.1269	1.03697	1.04528	1.07746	1.024	1.05848	1.03729	1.0767	1.05879	1.00637	0.996248	1.01829	1.03433	1.02403	0.956855	1.048	0.977077	1.06167	1.10617	1.10958	1.15184	1.04916	60.8506	11.6481	104.433	68.0682	28.9829	25.9208	63.0179	33.0784	75.6334	73.5652	100.719	37.8412	63.3588	23.0105	16.8276	33.1271	60.5271	39.8047	97.5831	29.6768	47.2338	39.4785	52.6042	19.1517	28.9631
ANXA3	7.04983	7.69588	1.04869	0.911037	0.964026	1.02569	1.11795	1.02893	1.22971	1.04784	1.45382	1.07457	1.06287	1.06822	0.988035	0.984823	1.04167	1.04108	1.25036	1.06557	1.10899	0.927985	1.08854	1.07288	25.5463	42.2201	33.9851	64.6692	10.329	27.6014	17.8094	16.931	68.2593	29.6438	105.208	33.204	48.9442	39.4536	23.8649	66.2665	42.0903	17.8031	95.3413	14.8963	66.4014	49.0591	51.816	35.1422	106.351
COMMD1	9.66088	9.5171	0.978094	0.977179	1.01823	0.942613	0.955233	1.01416	0.998177	1.02698	0.911174	1.00769	0.884694	0.979883	0.989476	0.987609	0.972894	0.923383	1.05468	0.966358	0.947827	0.980519	0.924938	0.973418	48.8048	18.0739	43.0942	46.5995	26.7227	41.298	43.1669	48.1202	66.6631	66.8482	52.2238	34.3247	38.9874	42.6736	42.6243	45.507	46.4858	44.1335	34.4762	54.2663	60.9916	44.1962	48.1723	57.1285	47.9474
RER1	7.22837	6.94994	1.00361	1.00463	0.981409	0.993059	1.03434	1.05737	0.997166	1.22569	1.09723	1.0538	1.00374	1.03581	1.04706	1.01092	1.1318	1.06378	1.02088	1.11457	1.013	0.766069	0.871465	1.02511	30.7649	16.8456	56.7052	50.6841	35.4008	55.2351	64.6743	48.7269	62.5745	63.6816	72.0536	25.1864	50.0102	48.4973	46.2231	40.2061	69.9861	41.3313	51.5359	39.5963	71.5276	65.6714	61.1848	39.5359	34.536
FAM49B	6.62976	7.31391	1.03677	1.21063	1.10166	1.18221	1.29088	0.993945	1.07757	1.0971	1.14424	1.08305	1.13331	1.16021	1.27158	1.05111	0.953278	1.14809	1.13702	1.30141	1.10874	1.03425	1.10964	1.12508	60.0173	5.1702	84.0203	22.0438	66.7871	24.7038	77.6004	29.7269	123.808	40.2805	93.4033	11.2142	69.9378	32.0003	30.0544	37.3653	74.978	30.0631	79.0067	23.4179	59.8977	48.9215	64.5566	26.7797	54.5821
ADRBK1	8.52028	8.61015	1.07471	1.12475	0.976922	0.991212	1.07453	0.977216	0.947102	1.03003	0.971223	1.11767	1.10526	0.984449	0.960087	0.943788	1.04821	1.0629	0.981413	1.02029	0.967691	0.993201	0.851453	1.00972	69.1584	9.92081	56.7772	51.1092	59.3542	49.342	99.4888	53.7241	40.8698	52.2202	93.4924	22.5462	64.1291	39.9299	46.0322	51.6992	71.1317	39.6572	75.1742	35.7626	61.3413	60.6768	66.7072	38.1229	54.31
GSK3A	5.87478	5.82676	1.02389	0.959592	0.975522	1.031	1.01655	0.982321	0.980845	1.02846	0.997543	1.00526	0.99496	1.00387	0.989558	1.00643	1.00474	1.01097	1.00753	0.983729	1.00261	1.03564	0.955924	0.999855	31.4672	10.9458	61.6461	45.466	62.5937	41.6068	100.154	35.7645	51.6729	51.3675	77.5814	28.5687	59.1969	37.1725	34.098	40.5046	56.3625	50.6219	72.2911	38.1491	43.027	60.7411	69.7137	36.426	84.5211
TH1L	8.73391	7.99535	0.958955	0.993752	0.959265	1.00952	1.00085	1.02221	0.96509	1.07902	1.15596	0.985492	0.929184	1.06336	0.957598	1.00892	0.985207	0.9545	1.01078	0.922884	1.03661	0.937923	0.892236	0.991872	66.8121	11.8988	68.093	39.3036	51.6925	34.9778	113.877	36.4802	47.5174	55.0193	69.4511	17.3772	31.9953	38.0483	28.5673	35.9409	91.5504	42.966	77.6622	38.6562	92.3816	59.6583	57.7306	27.3367	116.202
C6orf153	8.78054	8.97677	1.03396	1.07073	1.01618	1.0042	1.10447	1.04863	1.08482	1.05047	0.958087	1.07008	0.97146	1.03881	1.02107	1.03609	0.978919	0.963417	1.02896	1.04647	1.01328	1.02279	0.961802	1.02499	54.4015	10.9596	65.6165	31.262	40.8312	36.5332	74.2596	39.8213	85.3746	51.7235	83.0543	22.7368	44.4101	38.1939	46.3596	53.3382	67.7145	34.485	89.1002	34.7081	53.1802	54.7217	68.3818	44.7721	51.4436
ITM2C	7.68167	8.12013	1.24209	1.32282	1.09986	1.19727	0.965689	0.958342	1.04775	1.11172	1.03298	0.960907	0.764591	0.889894	1.01707	0.940841	0.991171	1.03445	1.07551	1.073	1.08173	1.19734	0.955973	1.04576	65.5943	33.5093	117.241	68.6475	50.5607	14.1748	44.7183	21.4481	12.0125	31.7582	81.3548	30.6805	138.999	8.61399	9.93292	40.6263	27.5159	5.45971	41.226	14.7116	163.744	14.2601	105.79	6.9214	66.8712
OPTN	8.74194	8.10442	0.947295	0.98227	0.995464	0.886503	0.840575	0.988244	0.985079	1.02168	0.997973	0.954079	0.926055	0.987494	0.968995	1.042	0.927478	0.931872	1.03023	0.944614	0.971282	1.01008	0.820892	0.960007	30.3676	15.3646	81.0721	50.9683	52.2073	26.5213	27.8674	41.2474	116.131	49.8172	69.2102	104.473	97.0884	35.3555	30.5147	47.9376	72.2569	45.6988	110.294	52.5358	73.0774	23.2301	40.1177	18.4339	16.3598
MBD3	6.31859	6.21937	1.03378	0.997282	1.00983	1.02379	0.909433	1.12623	0.938543	0.963387	0.753599	1.14016	0.915587	1.01609	0.945545	0.968424	0.945537	0.9458	0.955739	1.00534	1.03818	1.03948	0.740901	0.972031	54.597	13.6279	69.123	50.256	49.0105	36.0679	45.7053	45.8833	71.8939	58.9074	80.7636	40.1283	67.1569	27.5885	38.2703	38.3666	17.2538	44.1435	56.7974	43.0709	85.6871	55.1795	48.8017	29.1425	70.4711
UBAC2	8.43972	7.62904	1.05274	0.988777	1.01396	0.976564	1.04159	0.990496	1.00598	0.95983	1.03858	1.04591	1.12721	1.00423	0.952775	1.00251	1.05473	1.01188	0.914283	0.954021	0.923733	1.02993	0.749169	0.992329	71.8274	12.7545	75.8979	50.5861	53.7642	53.6389	41.2731	51.4863	47.1889	69.5516	64.8164	28.1019	52.0082	48.4708	44.9962	43.9211	117.356	50.6245	51.545	42.6298	89.916	63.2735	84.0064	40.3785	46.9804
SEPX1	8.87867	9.28377	1.01271	1.12379	1.05213	0.960538	0.958364	1.14665	1.0798	1.06656	0.986579	1.08985	1.01988	1.01059	0.900936	1.07503	0.916387	0.985429	1.04883	0.931556	1.04145	0.996094	0.993849	1.01891	53.3891	4.99462	57.0857	58.2249	32.5238	38.5614	83.8736	37.4195	97.3298	95.1289	36.8503	74.0958	110.98	30.5752	98.0112	81.7284	60.5073	57.1338	51.9294	30.4699	59.715	43.4312	70.6329	18.7676	19.892
SIRT2	6.98474	6.5025	1.07066	0.881373	1.02586	0.966613	0.845125	0.930958	0.94598	0.842665	1.01153	0.870581	1.17248	0.911129	0.819126	1.02986	0.971061	1.00831	0.883918	0.850244	0.979573	1.04138	0.823087	0.946739	29.1526	17.6979	57.105	36.9579	70.8101	37.776	47.1367	35.9964	37.1607	54.7597	38.4811	130.222	40.2417	35.0041	34.3402	40.8711	41.7143	56.9269	42.6708	61.109	26.0657	38.057	44.4595	35.022	39.4231
GNL3	7.95629	7.80157	0.917382	0.966359	0.990519	1.00208	1.0105	0.97897	0.91701	0.964122	0.977936	0.907919	0.965104	0.958295	1.02632	0.982378	1.01917	0.968264	0.938208	0.992162	1.04749	1.00541	1.00134	0.977949	37.2473	10.2464	47.4554	50.3718	28.0616	48.0376	44.9582	50.3128	59.0101	70.6621	77.3484	19.1129	30.4317	67.5543	43.6452	54.5633	47.6643	54.9642	56.3798	41.7205	49.4352	88.314	46.2259	67.2036	93.8314
EPCAM	6.31107	6.68574	1.10085	1.25828	0.923056	1.44654	1.51323	0.902533	1.16643	0.926769	1.26613	1.0598	0.764531	0.9526	1.12436	1.04123	1.05907	1.06153	1.35219	1.18566	0.958434	1.06696	0.98968	1.10095	122.686	48.5154	30.1198	96.0926	87.5635	7.09865	49.3881	2.22115	4.22435	16.8948	87.9045	36.5029	2.63149	3.27405	7.73119	33.1564	70.0624	1.42642	5.68014	4.7861	74.4853	5.04304	57.3521	4.79624	373.866
C9orf78	9.72268	9.4577	0.93846	0.986084	1	1.03988	0.97655	0.978479	1.00125	1.03113	1.03042	0.941832	1.06984	0.990445	0.9493	0.98377	0.965025	0.93694	0.96663	1.00831	1.01324	1.00963	0.909977	0.987009	75.2209	14.4753	77.4945	34.3556	49.5135	27.5153	54.0381	36.1075	68.6036	66.3192	89.599	29.362	45.1189	30.9378	27.5841	41.3874	81.9582	37.5211	53.1425	34.7711	73.4856	45.6911	57.3182	29.2895	84.4643
ESRRA	6.84504	6.55721	0.995712	0.995201	0.96397	0.932914	0.94354	1.02463	0.943162	1.53877	1.01966	0.948035	1.15492	1.00113	0.864951	1.03018	1.03471	0.982215	0.91548	0.890802	1.00071	0.610122	0.918402	0.986153	67.3495	26.4241	40.3221	72.8058	59.1485	50.6353	74.3455	51.3887	41.8352	50.5009	44.4964	63.5042	28.9489	33.9744	34.8809	39.0249	82.478	49.8791	70.8265	37.6485	88.7396	64.8424	53.0067	33.4572	53.9441
SLC20A2	6.78722	6.72462	0.92969	1.0092	0.985567	0.962563	0.901472	1.13262	0.892019	1.41709	0.932853	1.27815	0.949374	1.02044	0.868554	0.952463	1.10104	0.841803	1.11426	0.856849	1.04038	0.647495	0.660579	0.975927	58.7087	51.4547	99.5513	43.3783	49.729	26.5868	54.8777	53.8014	36.1189	40.8799	81.1756	32.8875	31.8573	66.0045	47.8237	47.0253	88.016	61.6502	120.043	40.6263	46.257	47.2353	43.7689	25.3238	54.425
CDC20	6.51831	7.39236	1.16271	1.21227	0.891431	1.19167	1.44734	1.20501	1.20689	1.00603	1.25115	1.43476	0.929734	1.21882	1.27171	1.09326	1.11546	0.993785	1.33891	1.52179	1.1161	0.770683	0.942637	1.1582	91.5192	0.510608	48.2303	21.1008	22.5145	36.8534	96.8767	22.1515	81.7864	18.6159	85.8004	1.09907	39.7251	16.2897	29.6928	38.2038	114.341	19.595	107.896	23.183	115.227	37.114	149.58	9.70505	45.9221
GPS2	7.54863	7.47524	1.03247	0.993501	0.978897	0.946157	0.923355	0.959245	0.982155	0.891226	1.03177	0.967081	1.23205	1.01073	0.873961	1.00064	1.09901	1.05198	0.960075	0.890339	0.992701	1.04412	0.912257	0.989225	71.8593	16.8317	66.5242	55.375	53.5735	44.9031	84.3776	45.7978	50.1679	54.2383	71.609	40.2036	55.7915	37.2735	40.1406	44.6189	92.0212	44.2471	55.0021	45.709	54.883	44.6109	43.508	35.0883	90.537
TIMM17B	7.24373	7.49849	1.08711	1.0516	1.03596	0.983881	0.94306	0.966499	0.997046	1.01734	0.92237	1.11451	0.93105	0.96784	0.983396	0.972105	0.983241	0.937873	1.04839	0.926947	0.985647	0.973292	0.816192	0.983111	80.698	11.1312	53.7179	59.5304	80.0205	37.0291	77.7104	43.1238	62.205	42.8462	80.1292	49.5726	47.3492	37.8132	42.8504	36.0225	65.4054	46.8185	36.0906	45.6625	96.1463	45.4355	48.2317	23.3196	102.103
RWDD1	9.48478	9.00599	0.992777	0.988084	0.985008	0.987193	0.959972	0.908299	0.996829	1.00478	1.03995	0.907601	0.98357	0.94567	0.888285	1.02376	0.961103	0.912706	0.975707	0.927227	0.945384	0.97221	0.977081	0.965866	42.9534	25.2111	64.7882	34.4072	57.8878	31.6394	43.4323	31.5745	69.042	67.8621	66.1204	53.2109	35.5166	49.1398	35.5059	44.872	65.7654	53.8876	51.7129	57.9108	73.0771	54.5078	41.9588	34.9121	76.3425
MRPS2	7.37098	7.26207	0.96222	0.985225	1.00772	1.05629	0.975364	1.09272	0.978963	1.23351	1.06469	1.06605	0.726415	0.994012	0.929771	0.935565	1.08523	0.866055	1.011	0.993283	1.02526	1.0266	0.987916	1.00018	51.4604	11.6662	54.0555	44.0635	63.3213	34.1816	54.3394	30.8175	79.9014	42.9643	62.3711	41.4291	34.2142	29.1905	25.9015	27.5457	86.8164	46.0614	53.7693	33.5862	95.5711	47.0057	52.8922	29.3821	132.621
C1orf128	9.59946	9.15877	0.880777	0.903842	0.903529	0.927776	0.994616	0.976874	0.970675	1.03339	0.997675	0.891926	0.939749	0.989029	0.997932	1.01089	0.938381	0.894838	1.02789	1.04103	0.958492	0.947925	1.02247	0.964272	29.0626	12.8059	58.5849	29.1219	34.2393	49.1176	54.9073	46.5574	44.6146	72.1058	64.8186	25.6422	41.234	64.133	59.891	46.8194	65.62	58.7976	50.7978	139.615	74.7663	70.1553	60.9579	83.2835	35.3839
ACTC1	6.068	6.43004	1.7308	1.05699	1.40114	0.924844	0.798464	1.28734	1.05706	0.943025	0.821419	0.935224	0.538434	0.977616	0.943991	1.30135	0.627451	1.28052	1.46514	0.778331	1.04043	1.08456	0.638974	1.03015	2.76231	0.0490339	117.4	0.853065	11.7188	0.0650573	0.0773379	73.7535	0.137981	0.461298	0.246563	89.2764	4.16098	7.03549	0.0135167	3.08706	68.3649	22.1822	173.56	68.4422	0.160831	0.0971949	482.678	36.0476	1.01092
MFSD10	8.64416	9.30832	1.08529	1.08574	1.02423	1.10702	1.08596	1.09171	1.06863	1.0731	0.919526	1.12132	0.839033	1.03558	1.05006	0.985721	1.04256	1.0245	1.13997	1.06714	1.12634	0.978733	0.823387	1.03693	77.186	8.70344	52.3725	55.5604	45.3848	22.4717	56.071	23.5988	84.2357	40.3239	70.7117	14.9686	78.2065	14.5164	28.6419	38.508	111.304	42.9219	82.7563	14.7117	152.546	32.6389	49.4606	21.7953	35.9248
ICAM1	5.94649	6.21577	1.21396	1.34287	1.0579	1.12719	1.01841	1.06775	1.13824	1.06586	1.31806	1.0878	1.8987	1.04092	1.02001	1.01339	0.835034	1.03658	1.19851	1.15571	1.03787	1.03895	0.945304	1.12662	87.7914	2.48801	110.266	31.2978	27.8025	10.7674	90.9991	66.5759	104.172	55.8519	309.191	17.3352	97.1453	8.88534	9.97865	18.0309	15.356	13.2003	122.581	14.3288	174.682	7.1911	220.309	4.01692	10.2006
C2orf24	7.81939	7.00061	0.993209	0.901563	0.974947	0.888177	0.993896	0.994894	0.972061	0.699171	1.02968	1.08631	1.1643	1.02152	0.915998	0.945967	1.11089	0.964727	0.895875	0.996875	0.975256	0.740967	0.894598	0.960042	28.1633	16.6216	61.6657	57.0781	52.1588	68.1232	74.6851	51.821	34.5112	62.3181	59.6731	42.0828	46.6645	52.4044	40.8045	46.0201	70.2738	43.9657	59.8483	55.6873	82.4256	75.6118	39.4512	40.8128	33.3891
TMEM40	5.94373	6.05017	0.971966	0.985049	0.893029	0.925247	1.16307	1.04906	0.926517	1.03029	1.16963	1.34525	0.915673	1.24735	1.16977	0.935937	0.998936	0.978197	1.20275	1.30881	1.03371	0.666295	1.4123	1.06328	26.047	0.100476	22.7005	33.0663	17.0329	93.8745	10.7583	74.069	44.8771	45.5193	37.087	1.14567	40.0693	100.728	103.629	76.0977	21.1221	112.505	22.8473	64.1353	31.9863	86.8486	26.2084	90.3125	16.1922
SLC39A4	5.85318	5.88716	0.966655	0.997624	0.991269	1.00948	1.06426	1.15116	1.05138	0.925486	1.34656	1.1869	0.914804	1.14261	1.07995	0.950354	1.17961	1.29709	0.964396	1.17527	1.10049	1.02684	1.13111	1.07873	100.003	8.15511	47.3995	36.7476	70.1525	22.6506	60.7839	41.2612	62.0594	41.8984	37.9704	8.10053	38.4356	21.6818	23.7031	25.508	97.0838	22.6874	90.1109	16.3901	116.804	4.60657	46.1726	32.5541	77.3337
NUBP2	6.5316	6.51226	0.991575	0.999121	0.96907	1.04945	0.959479	1.00256	0.994581	1.02794	1.02745	0.927918	0.651156	1.0556	1.0325	1.04256	0.810618	1.12264	1.03329	1.02096	1.00849	1.06314	0.87734	0.984164	71.4092	13.2617	63.7128	42.7091	62.8122	43.1342	43.1266	42.5327	53.0418	57.6579	70.6447	30.3865	50.5628	34.7525	38.5528	40.5901	66.6041	43.0985	54.6919	37.732	79.8693	48.4607	53.7877	43.7963	48.3366
SGTA	7.11798	7.09528	1.03579	1.00779	1.02873	1.00701	0.962938	1.04168	0.996811	0.883858	0.94237	1.01895	1.1054	1.02398	0.969904	1.00056	0.957652	0.99129	1.02352	0.970222	1.04425	0.781334	0.82424	0.981823	39.8992	15.5416	73.6686	47.604	54.7946	39.7338	39.1294	35.7756	74.7322	52.1276	76.6453	47.8372	46.096	33.7203	32.7558	39.3283	40.3636	51.305	73.1371	35.9067	124.892	62.1384	40.8322	32.4678	75.3812
SYTL1	6.04935	6.85067	0.88884	0.880153	0.801163	0.930906	1.29713	0.84671	0.865216	1.43664	1.28213	1.01028	1.1668	0.977194	1.17559	0.939462	1.06985	1.08773	0.842715	1.02334	0.920156	0.765199	0.873741	1.00385	33.0557	18.9056	26.98	79.9223	32.215	56.5257	49.0327	72.403	48.0187	76.0378	60.438	8.23139	55.8207	74.7881	65.9538	41.5296	69.5697	43.4682	26.9805	53.3812	77.8285	75.8154	29.7018	42.5917	42.0467
IGBP1	8.59783	8.25719	1.0125	0.948217	0.978049	0.923042	0.942567	0.888845	0.948985	0.931448	0.980047	0.908402	1.05764	0.98796	0.962569	1.00759	1.05409	1.06152	0.884292	0.941281	1.0027	1.04257	0.938189	0.971548	54.4492	34.4454	56.4426	55.7253	77.4603	41.1136	24.8521	39.0217	53.4903	82.4116	54.5268	55.7258	48.4699	40.1672	26.8124	40.997	61.7898	47.6379	60.9262	42.5331	43.2866	49.178	53.8102	27.3847	78.0959
ACIN1	6.50503	7.83586	1.05197	0.996251	1.01251	0.994821	1.02965	1.02169	0.941797	1.53463	1.08923	1.12637	1.19118	1.08419	0.923066	0.965153	1.12784	1.289	0.909522	0.943237	0.971499	0.844792	1.09865	1.05462	55.48	9.83024	69.4439	47.6766	29.3543	41.4868	103.819	39.908	52.7226	60.2577	79.0994	24.3466	58.3051	45.1024	30.8674	41.6604	70.879	54.0343	70.4898	41.7536	58.3785	61.327	66.2822	25.4565	69.4349
DDX42	7.50738	7.31917	1.09524	0.977772	1.0508	1.00309	0.972777	1.02618	0.974833	1.04886	1.00812	1.06572	1.00739	1.0021	0.975494	0.993896	1.08242	1.09184	0.942944	0.964801	1.00451	0.793296	0.781336	0.993496	65.6409	21.6868	67.4159	63.6272	53.6133	29.2081	61.1548	39.3464	59.2293	68.2133	101.611	36.1149	46.3084	32.2628	31.0378	43.6408	62.413	32.3423	59.6252	33.8998	57.422	49.4326	59.6298	26.3125	79.0588
TMEM14B	8.97314	8.47163	1.01933	1.04465	1.00787	0.921581	0.949587	0.903045	1.01126	1.01593	1.02572	0.931872	0.75473	0.995084	0.985279	1.01917	0.933269	0.950849	1.12024	1.05434	1.0001	0.983947	1.00251	0.982399	68.4749	25.5645	44.0417	69.6244	37.7184	30.53	63.7686	36.0063	48.0839	60.0677	87.038	61.9707	41.488	37.3016	28.7096	42.9746	76.5976	29.4221	60.2328	38.3852	29.8985	34.2996	67.0068	30.155	49.731
MDFI	5.78158	5.67232	1.03517	1.07341	0.978457	1.00579	0.935668	0.963793	0.989599	1.02821	1.12037	1.07038	0.972999	1.02329	1.01027	0.995507	0.973051	0.991758	1.07231	1.00986	1.02122	1.05951	0.945629	1.01315	40.5383	0.957897	106.873	23.6933	17.4245	43.9872	85.0137	30.5177	130.86	30.9572	57.7069	2.68668	46.9113	23.2147	32.5968	40.152	122.584	28.7708	129.208	16.6286	35.1156	63.9048	65.7392	51.7972	11.0346
EXOSC4	7.15152	6.94468	0.890609	1.01595	0.968532	1.04652	1.0657	1.246	1.04365	1.14568	1.08574	1.04106	1.1753	1.06525	1.15849	1.0714	1.00171	1.09144	1.28827	1.13301	1.11234	1.04897	1.09422	1.08523	56.152	11.2081	69.3926	48.091	84.4464	29.647	92.6972	32.8329	114.463	37.2551	36.2159	14.5387	39.7329	28.3547	28.0231	26.6651	19.7431	31.2494	49.3073	26.4161	95.4942	39.963	43.6419	37.1837	96.6648
SLC35B1	8.98131	9.15163	1.00873	1.00299	1.00258	0.957124	1.06372	1.01896	1.00444	0.95952	0.946945	1.00342	1.05435	1.01756	1.03264	1.005	0.95672	1.01169	1.01271	1.03978	1.00263	0.989165	0.98736	1.00372	66.532	15.6995	61.0392	43.7275	57.5178	41.2297	66.0918	41.3327	52.1282	63.801	74.157	37.1455	46.1648	36.7176	39.3152	46.168	51.7198	47.1279	47.6886	46.4447	104.211	54.1911	65.2124	37.9795	91.3821
MRPL9	7.3547	7.05806	1.04196	1.03519	0.979997	0.998931	1.01144	0.929705	1.06316	1.05763	1.03166	0.904623	0.909252	0.989006	0.951399	1.03784	1.07125	0.960051	1.01813	1.00869	1.00472	1.07584	1.05283	1.00635	65.3785	17.729	55.3998	31.3503	86.1708	31.521	145.437	36.8323	86.5236	52.9043	88.7468	30.9631	44.4388	33.3603	32.4476	38.7582	60.6664	44.4077	61.1933	35.4902	77.2911	52.7762	64.5533	31.5123	86.7076
RIC8A	8.21855	7.22858	1.05733	1.01912	1.03472	0.975287	1.05883	0.951821	1.05648	1.17856	1.10212	1.13367	0.885938	1.08098	1.03416	1.03354	0.833204	1.05448	1.07442	1.10297	1.0644	0.678043	0.856829	1.01271	40.3845	9.91505	75.5999	44.2462	61.9228	40.9844	82.1292	36.5363	111.415	51.8443	77.4844	19.9655	60.8234	30.1144	33.9319	39.048	74.0515	34.2468	104.3	31.9206	84.5936	52.5409	88.9703	31.1597	32.8539
CHTF8	5.83828	5.99411	1.01782	1.00636	0.995622	0.996179	0.997461	0.987385	1.02347	0.834525	1.12533	1.05124	0.8473	1.04378	1.09441	1.02423	1.18692	1.10306	0.925173	1.03364	1.01581	1.76352	1.13948	1.05775	56.6935	17.8101	60.8902	58.5291	49.0325	48.0244	67.9566	39.0464	74.5753	59.9053	97.5436	25.7952	68.8636	38.5018	37.1011	49.6132	62.4263	42.0759	77.6811	41.7519	73.4487	60.298	75.211	29.6179	49.362
AREG	5.6104	5.53691	1.0071	0.973251	1.00926	0.978785	0.9654	0.991799	0.988011	1.01054	0.993952	0.98301	1.00162	0.99949	0.998625	1.01024	0.991728	1.00355	0.997414	0.991738	0.998538	0.982524	0.988916	0.993595	25.3523	1.11988	32.6022	9.67059	5.25641	17.0804	46.4901	94.537	78.5219	49.607	25.6208	0.1303	12.5982	19.7076	13.1781	10.4713	74.028	46.3615	107.959	8.41273	341.573	13.3231	394.635	93.1257	31.591
A4GALT	6.94439	7.42284	1.17768	1.029	0.994484	1.1028	1.09362	1.06411	1.0061	0.980124	0.947865	1.01316	0.683275	1.03044	0.870956	1.02136	0.972921	0.923521	1.06461	0.96499	1.11518	0.984622	0.750002	0.99004	75.318	6.36247	119.816	205.316	71.0813	43.1103	22.354	42.5213	37.3466	19.712	130.766	24.3464	59.0658	17.5631	17.9884	21.5356	155.759	14.8061	50.8634	7.44185	69.5084	44.5589	96.3413	6.9275	92.0387
BCCIP	7.85146	7.94084	1.00145	1.09747	1.00008	1.0589	1.04555	1.00781	1.06541	1.02287	1.15645	0.924049	1.00638	0.99763	0.986604	1.02788	1.04371	1.00821	0.98678	1.0366	1.01011	0.983982	0.938395	1.01935	59.8836	18.8585	60.5847	55.2757	44.8684	28.2366	64.6135	36.3687	77.4321	59.4196	106.146	34.1687	38.3397	41.6126	32.2649	40.3801	69.4335	46.0634	61.8335	35.5833	53.265	65.6622	44.6781	42.1118	51.6896
PACS1	6.96728	7.34254	1.05478	1.02117	1.05929	1.08243	1.04585	1.02862	1.02769	1.04064	0.893194	1.04255	0.90864	0.975004	1.03139	0.965285	0.984299	1.00006	1.08367	0.978854	1.0353	1.07958	1.07495	1.01968	91.6145	41.0659	90.5599	41.4984	68.9378	36.1968	71.2256	31.9239	47.7528	41.3488	85.3346	33.8495	69.0601	24.3587	31.0589	40.7256	66.5009	37.4925	88.5958	26.5165	94.3427	40.7603	47.7928	21.8405	40.031
NCBP2	7.34852	7.74188	1.0873	1.07804	1.02306	1.11776	1.04127	1.00191	1.02543	1.04259	1.13205	0.985928	0.967271	1.03762	1.06342	1.03689	1.02506	1.0737	0.948636	1.107	1.0504	1.07293	1.01826	1.0446	86.3788	7.25152	92.9531	30.5402	50.534	23.0793	78.5464	21.1422	84.9962	51.5588	89.4163	21.719	37.4069	26.5624	23.0529	27.649	97.1708	32.2721	62.334	27.181	81.0373	47.1946	114.873	18.3079	96.2744
ACLY	8.33254	8.86064	1.05396	1.07285	1.04956	1.12984	1.08898	1.13718	1.03434	1.05958	0.950273	1.05479	0.878569	1.01261	1.05027	0.980976	0.972747	1.04772	1.06475	1.09069	1.02661	0.986261	0.954345	1.03319	92.1409	10.4139	69.9998	42.4601	86.3453	25.4036	58.7325	25.5334	82.0983	81.2672	63.762	17.7039	61.5986	26.7278	31.3966	61.6453	84.6112	20.9466	80.2634	28.1419	85.4029	53.3522	94.7284	19.9271	159.05
FHL3	6.61461	6.94146	1.05705	0.766006	1.05824	0.81867	0.629852	1.08377	0.869072	1.02426	0.957556	0.93944	0.969919	0.869253	0.828342	1.03653	0.908931	0.941918	1.12653	0.830454	0.953857	1.04611	0.741365	0.92653	37.5653	3.18052	65.6398	11.883	15.2682	7.23157	13.5348	25.5076	29.0621	19.1272	21.7298	301.144	25.3502	13.5162	7.08201	11.6865	29.9894	78.5314	48.5048	107.853	23.4672	18.0906	53.9604	10.116	15.6551
TMEM9B	9.08316	8.70131	0.939916	0.955301	0.967769	0.881051	1.03536	1.00413	0.997552	1.04725	0.905504	1.08064	0.995826	0.994304	0.972525	0.992354	0.962114	0.887106	1.01703	0.99982	0.96692	0.910397	0.760959	0.96542	32.4818	17.6808	68.3327	54.1011	50.8044	55.3446	48.1523	58.5307	91.1001	73.1141	72.8471	31.5505	54.7018	67.9559	59.3175	53.4354	44.7238	56.6718	53.4689	50.8458	70.0224	74.1323	55.0668	64.3179	36.1734
FAM50A	9.24778	9.69957	1.05443	1.05996	1.01833	1.04062	1.00307	1.16331	1.01177	1.02388	0.912975	1.0301	0.854289	0.989739	1.00047	1.00003	0.981829	1.00768	1.04765	1.02374	1.01397	1.00043	0.945919	1.00877	50.2495	16.9079	86.1023	48.4662	97.9114	27.4708	215.566	40.5191	40.8997	45.8185	78.6554	47.9337	53.3614	22.5398	30.6882	32.8078	88.1443	46.97	70.8606	38.6726	93.7518	35.7139	100.497	27.7115	71.3849
DGCR2	7.57249	7.38408	0.962388	0.98574	0.995121	0.945842	1.06733	1.15756	0.961186	0.879482	1.04668	1.10471	0.827066	1.04503	1.02975	1.00866	1.066	0.972479	0.936949	1.08649	0.993121	0.758265	1.10847	0.997062	97.0113	13.4528	69.4729	46.2587	62.8065	42.2985	174.543	43.9538	49.6198	72.2537	59.5134	22.6386	68.5113	37.9412	44.2453	43.7665	74.7852	35.2041	54.6093	36.4634	79.4268	58.5502	57.1763	25.9154	28.1826
RUVBL1	6.58384	6.65585	0.949286	1.04173	1.00197	1.03774	1.01249	1.03642	1.04241	1.01737	1.23214	0.973543	0.852673	1.06215	1.09482	1.04715	1.10326	1.16403	0.933398	1.18568	1.07852	1.08933	0.910301	1.04126	55.1312	5.0132	39.5137	95.5273	77.7372	29.3592	148.773	29.818	62.2908	39.4422	80.6197	11.502	41.7931	27.4826	20.6895	35.1242	72.7381	30.9822	82.0592	29.6468	99.925	54.0695	99.9351	38.1084	138.49
GSTA1	5.81024	5.6563	0.934596	1.02776	1.00966	1.15355	1.30132	0.874069	0.998652	0.730629	1.00251	0.927521	0.857277	0.850871	1.01241	0.902377	1.45573	0.761492	0.731693	1.02097	1.02834	1.77267	1.60975	1.0459	3.02298	1.13465	5.20082	375.008	22.3085	18.0626	0	64.6608	0	5.79452	83.0479	4.5368	0.0946539	2.72121	0.175683	93.9276	0	3.57242	0	0.0328893	0.105874	54.2074	2.67169	0.22551	18.4736
NOLC1	6.55228	6.82312	0.987297	1.16246	0.98533	1.10408	1.10274	1.05998	1.0755	1.47643	1.30594	1.08436	1.22422	1.06619	1.09194	1.0095	0.959089	0.913521	1.08396	1.21228	1.02971	0.710022	0.837359	1.07057	48.1385	6.76521	62.4662	44.0201	44.7654	30.9876	95.7702	36.1503	89.1076	55.1499	106.245	19.7243	44.8937	39.2384	26.9013	38.4477	83.2624	38.2782	81.3015	32.6672	55.9478	90.553	41.8766	42.273	46.0091
TMEM106C	7.64493	8.18375	1.06112	0.988394	0.930061	1.12533	1.03947	1.09305	1.03178	1.0112	1.09428	0.927757	0.911593	1.05158	1.06775	0.968769	0.969918	1.01686	0.993773	1.04958	1.00276	1.00388	0.881774	1.01051	56.8997	20.6113	46.1396	31.7337	49.8486	22.761	122.007	21.5228	55.5475	47.6653	110.849	19.3581	41.0736	30.9997	28.1307	28.6778	111.951	20.9352	112.557	25.1539	145.165	28.5292	120.461	15.2676	98.7393
CLIC4	7.97872	8.51056	1.14824	1.10192	1.1421	1.20616	0.946021	0.994076	1.09494	1.01771	1.08259	0.965803	0.997679	1.0831	1.08956	1.02504	0.972585	1.09584	1.0617	1.18196	1.08216	1.01719	1.01282	1.06282	64.7666	12.7287	174.152	12.1407	57.6471	13.0485	36.3417	22.5734	88.0149	105.071	116.057	40.661	86.3674	12.1641	9.93664	44.4376	103.336	18.4189	110.227	20.3224	116.603	30.6534	81.3118	19.2033	91.2295
C17orf89	5.90815	5.86138	0.990613	0.978336	1.01102	0.966936	0.964955	0.964487	1.01355	1.00161	1.01129	0.965788	0.956884	1.02999	0.969697	1.01234	0.938597	1.07722	0.976	0.997632	1.00755	0.977734	0.941094	0.988253	56.5139	15.2465	32.8302	33.4385	44.2239	27.7941	64.6304	38.2003	52.2727	65.1305	45.1178	38.2652	25.2529	23.0221	24.1369	25.6537	50.0049	47.3658	41.6743	38.1661	91.5233	43.7645	58.6776	34.146	54.8066
PTGES	6.803	6.35295	1.09078	1.11676	1.01051	1.23072	1.28289	1.00824	0.982836	0.799866	1.21922	0.917853	1.30246	1.09581	1.2014	0.967229	0.938831	1.11769	0.851184	1.1571	1.16215	0.711981	1.29055	1.06934	29.0391	4.67462	31.8048	58.2957	15.5922	67.98	164.501	33.0797	50.0728	62.5132	260.266	9.99814	31.5457	27.596	45.1466	38.8645	136.51	67.5557	127.786	10.3585	155.88	47.962	170.268	21.0616	11.0895
SNF8	8.05998	8.34646	1.1278	0.987912	1.03056	1.0498	0.967397	1.09401	1.01315	0.983152	1.01245	0.946819	1.19743	1.02221	0.96435	0.959461	1.00841	1.02151	0.853401	1.03623	0.977843	1.02748	0.911903	1.0092	89.7052	14.908	69.5928	41.6537	55.6737	34.7182	84.5713	43.6614	60.679	55.2034	77.7087	32.4605	51.4575	27.9318	33.3601	36.2969	74.0708	39.0734	59.8248	37.3645	86.2746	42.2626	69.4068	28.5679	97.6902
PTGES2	7.85147	7.938	0.981567	0.953876	1.00189	0.976714	0.915838	1.02262	0.980062	0.978431	0.970533	0.93461	0.919562	0.969479	0.914466	1.01654	1.02526	1.03159	0.939513	0.912376	0.982155	1.05466	0.997085	0.975182	65.2515	11.6	60.481	53.2365	43.9986	39.1276	65.8227	38.1969	49.9534	42.1498	49.2474	76.8469	36.7914	36.3181	44.9519	34.3464	68.1317	46.7914	50.2813	45.0791	96.4818	45.4708	56.7701	30.9427	99.861
TWF2	8.08411	7.83592	1.02479	0.948021	1.01215	0.996012	0.807094	1.01291	0.93965	1.00073	1.01601	1.04761	1.05297	0.978419	0.878107	0.994441	0.967094	0.915242	1.03726	0.933189	1.02942	0.919539	0.842843	0.969215	69.5577	10.5574	65.5829	62.7107	53.9595	43.1026	28.9341	50.817	78.4206	53.2764	56.6481	75.5195	84.1383	30.0444	34.8868	34.0131	50.489	43.2399	64.0379	46.5026	56.1175	48.6851	41.4863	24.1406	30.9341
FGFR3	6.86684	7.46636	0.842949	0.928394	0.821343	0.931502	1.54829	1.1686	0.949835	0.93224	0.914948	1.14449	0.788458	1.07623	1.09253	1.03547	1.09514	1.01496	0.756642	1.13692	1.03092	1.00985	0.757257	0.998904	40.0503	0.462826	9.38238	71.2581	36.9063	99.8372	11.7228	90.9731	12.7303	60.1245	82.3095	0.657323	33.6462	41.2293	84.613	55.3921	113.605	95.3621	40.9953	37.2975	50.8865	120.597	43.945	62.3508	31.3941
C19orf48	6.61615	6.80449	1.0133	1.02941	0.946466	1.11557	1.10575	1.06499	0.982296	0.988625	0.945416	1.06971	0.732385	1.03831	1.12105	1.00891	1.07259	1.01941	0.995245	1.12007	1.01542	1.01834	0.821455	1.0107	37.7365	7.60339	48.2119	36.1459	48.3622	29.4602	88.8195	23.9648	62.7561	52.5842	57.5518	9.26028	30.6787	26.6112	18.8898	27.0493	48.6272	39.2222	65.3023	28.5626	55.0607	49.4968	83.8879	34.2595	159.268
SNRPN	7.59133	7.16835	1.09774	0.983849	1.08468	0.89798	0.789593	0.868491	0.880092	0.964084	0.871949	0.882803	0.886293	0.828543	0.889941	0.962461	0.97785	0.944692	0.94953	0.863951	0.993226	0.945433	0.86225	0.925021	49.6924	60.3594	74.9093	81.536	13.9272	26.0701	7.84111	37.8861	9.80695	52.0964	73.5945	173.141	39.572	23.4255	24.2452	42.6542	16.9714	53.5733	28.9292	57.8827	80.3441	28.6141	56.5904	27.0839	112.891
IL13RA1	9.49992	9.1613	0.936553	0.929172	1.01735	0.939353	0.994492	1.05603	1.08294	1.00371	0.929807	0.952975	0.913766	0.989009	0.993434	0.978412	0.914076	0.931052	1.05779	1.06129	0.977484	0.966007	0.726893	0.969123	42.6464	5.51229	75.4855	31.2249	23.1244	65.8489	97.2537	58.9272	52.0857	76.5137	65.1973	27.5112	72.8055	70.3343	40.5611	58.0159	12.6134	46.4109	74.418	42.3706	29.4145	88.6091	77.9495	53.131	29.4923
ACTL6A	7.71064	8.51945	0.991908	1.07154	0.967118	1.17015	1.14418	0.995507	1.07643	1.06806	1.09885	1.05902	0.999095	1.06658	1.11944	1.04582	1.08093	1.05626	1.02469	1.15406	1.03308	0.960561	0.898529	1.05152	95.3312	6.21788	65.8019	28.3779	73.9976	24.0242	75.1375	23.899	42.5637	39.2144	101.179	8.55885	35.8223	30.8294	17.8878	28.8364	59.1308	25.6163	82.2226	23.6849	61.0791	40.7479	156.967	23.9763	92.9625
CCL21	7.01074	6.28677	0.896733	1.00941	1.16725	0.965449	1.17264	0.633541	0.923679	0.825134	0.566452	0.770788	0.854887	0.965624	0.828344	0.806891	0.841734	0.970849	1.15452	0.975226	1.0561	0.975281	0.862796	0.915396	4.99571	4.0334	57.8371	17.6906	66.1599	241.538	17.9075	198.883	0.213247	100.938	139.51	146.277	262.348	25.1562	1.2556	11.3858	3.54983	6.81255	135.139	42.0586	0.454559	13.0087	0.60011	20.849	4.00764
CCDC12	5.83017	5.85708	0.90155	1.00426	1.00325	0.985628	0.985624	0.978661	0.946177	0.993608	1.03265	0.976571	1.00452	0.996736	1.01034	1.00326	0.968731	1.01543	0.956694	0.982688	1.00383	1.00397	0.980551	0.987369	49.6148	14.8898	48.5046	68.7823	23.1769	48.9459	47.6371	66.943	58.0544	64.7607	61.1121	33.0004	52.1679	52.6615	37.0809	37.1549	45.0073	67.261	41.9273	39.1003	46.1075	71.786	38.6156	50.9503	44.8717
CLDND1	9.15946	9.01239	1.03841	0.9989	0.959304	1.02932	0.964336	0.977858	0.964148	1.01613	1.03931	1.02298	0.95376	1.06301	0.989613	0.99834	0.94524	0.913467	1.10845	1.13378	0.997818	0.965969	0.844794	0.996426	71.4473	4.52172	71.1458	28.884	127.413	38.2349	79.9445	42.0004	28.9121	50.5286	114.429	17.32	47.3007	55.4562	38.7963	37.728	71.4254	55.4919	55.239	43.7896	95.5702	49.7467	129.054	25.1929	45.2323
NCOR2	8.56787	8.63552	1.08716	0.986856	1.08985	1.04468	0.900278	1.02789	0.984089	1.02746	0.97664	1.00944	1.04382	0.997064	0.978938	1.00197	0.964358	1.01052	1.02922	0.985749	1.03571	1.00453	0.830627	1.0008	91.3044	14.9274	95.1606	49.8933	56.1667	28.4787	53.7354	32.8464	48.9409	68.866	96.9236	45.3098	81.1078	23.1683	28.2412	36.916	88.3753	26.4908	102.359	29.2875	53.202	35.5653	99.3109	17.8974	64.0795
C16orf13	7.37766	7.20534	0.999188	0.972292	0.964935	1.03411	0.952892	1.09544	0.949838	1.04268	0.984293	1.01992	0.991437	1.02898	1.00573	0.97464	1.0697	0.99314	0.972373	0.922055	1.006	0.946611	0.746007	0.984393	89.4847	19.6168	68.0159	46.9317	130.183	24.7829	32.5897	34.6109	49.1002	38.0774	36.5307	22.7125	50.6797	21.817	29.7089	22.9492	133.403	35.4988	79.3273	29.7394	145.055	28.3218	58.0536	27.4639	69.0523
DSE	7.24292	7.89309	1.09107	1.09686	1.04731	1.05839	1.04446	1.13482	1.15495	0.998978	1.05109	0.983919	0.98853	1.14842	1.11919	1.08743	0.944091	1.0135	1.04798	1.14788	1.06348	1.03615	1.10524	1.06494	35.4325	12.6061	79.2327	38.4746	65.4343	38.0967	55.3276	40.618	67.7713	64.7693	82.3686	30.4248	56.5385	46.4857	25.7026	40.7317	70.854	34.3198	132.181	47.4592	50.8458	49.5428	81.8921	42.2191	49.0019
RAB34	7.44624	7.87726	1.0723	1.08701	1.04269	1.16591	0.973722	1.12883	1.02597	0.986546	1.08421	0.913809	1.00137	1.04336	1.03016	1.00542	0.920271	0.917726	0.97069	1.06166	1.04444	1.0429	0.896144	1.01977	109.151	4.67059	88.8197	52.8237	83.7187	22.3588	88.8349	35.4703	65.6466	52.7173	90.159	19.1392	58.6484	19.0312	23.8638	35.9611	93.6104	21.2223	62.0662	20.1123	135.755	29.5828	104.923	22.0981	72.666
NSUN2	9.61108	9.75509	1.0018	1.06441	1.00934	1.0452	1.06109	1.08511	1.02962	1.04932	1.10344	1.12537	0.976517	1.07363	1.0693	1.01841	0.965856	1.00159	1.14053	1.11767	1.03363	0.990611	0.926617	1.04234	77.275	5.40489	40.8313	30.5517	36.8745	26.1383	97.8125	30.4643	64.4299	49.9852	69.8772	16.2605	30.5622	30.1093	28.76	36.9782	110.308	31.8614	95.049	27.892	72.8427	54.4715	122.792	31.9713	41.1087
MPRIP	8.06857	7.67532	1.07087	0.925207	1.0457	0.928356	0.904682	1.0577	0.96835	0.968817	1.02017	1.02883	0.821689	1.01838	0.940944	0.972959	1.07228	1.11213	0.934272	0.892712	0.995064	0.929646	1.00045	0.981391	57.8317	14.3924	69.4743	35.1939	36.5149	55.8394	55.5532	50.8698	35.5694	58.5018	67.3157	51.362	47.9636	51.1198	32.0992	49.937	92.5521	37.7157	68.8422	47.6826	69.9294	69.8166	48.7195	34.1258	53.59
GRHL3	6.15602	6.49565	0.819376	0.860405	0.806925	0.900968	1.2036	0.902938	0.854773	0.868341	1.00067	0.791705	0.849884	1.09719	1.01606	0.940726	1.03187	0.973042	0.715144	0.995223	0.945829	1.0072	1.04565	0.934644	31.5916	0.238224	30.2579	33.3033	16.476	123.62	7.01627	151.763	18.8913	38.0125	24.929	0.164085	26.2646	132.444	58.5662	49.9693	58.8493	114.906	19.2911	82.6958	27.0643	163.091	13.688	91.7535	48.8918
MGLL	6.81034	6.41292	0.845223	0.802097	0.910198	0.831154	0.877696	0.966249	0.888912	0.798593	0.891929	0.868987	1.0955	0.94663	0.928633	0.974956	0.984501	1.12284	0.934633	0.82807	0.853957	0.919678	0.838142	0.909932	9.326	9.33602	29.0918	46.1709	23.69	105.141	12.5854	122.011	12.6578	37.2962	14.2758	68.9068	48.0007	160.873	28.0539	50.1585	15.4631	47.8065	30.9059	92.6559	32.5905	105.084	21.6962	91.3463	65.212
WSB2	7.4303	7.72224	0.972964	0.937462	0.986054	0.956735	0.980635	0.983739	0.96642	1.00534	0.975366	1.01594	0.95914	1.01162	0.94225	1.02759	0.956702	1.02388	0.9824	0.988638	0.983928	1.02397	0.949762	0.982407	65.8798	6.45491	42.0479	26.2001	60.0037	56.1726	55.4254	50.6099	42.808	43.2943	65.8423	52.5842	46.1821	52.1037	46.3676	47.7961	56.3258	35.0013	83.5963	55.5089	60.4989	69.4933	108.454	51.4925	77.288
SLC16A1	5.77914	6.03642	0.999969	1.03482	1.00387	1.0679	0.985	1.03621	1.07882	1.09051	1.26894	1.09213	0.873807	1.15809	1.06049	1.13587	0.951614	0.989322	1.3813	1.29102	1.12705	0.988873	0.918247	1.07304	50.2798	0.414248	97.5655	6.23807	33.6111	22.7364	22.9302	12.5276	169.893	21.4089	45.559	18.3055	36.6482	17.0257	22.372	57.8525	179.366	25.4517	161.901	15.2944	169.033	70.0216	92.9552	32.7025	59.1111
UBE2E1	9.7377	9.55779	0.989322	0.961002	0.993478	0.959355	0.965789	0.998235	0.971781	1.00489	0.954984	0.959465	0.882428	0.997842	1.01508	1.00142	0.958247	0.98872	0.992227	0.995131	1.00817	1.00233	0.983819	0.980177	45.1687	14.1507	62.5995	60.2007	55.0899	51.8447	52.9248	63.372	67.2056	73.8904	87.5111	32.0747	57.5892	61.3743	59.911	61.2112	46.5464	48.1772	47.7908	59.3023	44.4707	84.617	53.4532	43.5913	65.857
GPR172A	6.49574	6.55228	1.0897	1.14594	1.00602	1.05012	1.26883	1.20793	1.16841	1.04055	1.18833	1.45004	0.934882	1.18369	1.24662	0.977992	1.10977	1.01331	1.20239	1.22589	1.15576	0.857093	0.851831	1.1131	73.1208	6.40367	70.6791	36.2192	113.202	28.2258	87.6282	27.9979	99.2678	40.092	58.2467	8.69354	57.1093	20.3405	27.407	30.346	41.2705	36.7408	76.1144	20.6152	126.887	47.7825	52.2234	26.1023	61.892
MIDN	8.29212	7.25933	0.910854	0.962027	0.977873	0.996193	1.0876	1.01177	0.921732	1.04548	0.919244	1.20191	1.21825	1.08275	0.946466	0.947517	0.985014	0.98349	0.939456	0.944459	1.00774	0.660337	0.801803	0.978665	31.9729	5.22455	38.3184	125.706	36.823	58.9384	30.6027	66.9707	30.9189	86.3511	91.827	15.0745	41.1721	49.9293	48.6895	45.0558	27.845	86.6382	60.8143	28.4222	109.458	54.3244	68.8153	61.7356	15.93
CCDC47	6.97897	6.9024	0.927572	1.01378	0.967569	1.06005	1.10959	0.979583	1.01898	0.99555	1.1565	0.948353	1.41823	1.03662	1.02194	1.00656	1.03467	1.14295	0.893294	1.13205	1.00285	0.773061	0.890661	1.02526	63.1287	21.3467	57.3201	47.9626	58.0866	43.1828	44.0891	44.5991	38.0766	82.1137	80.4456	38.6653	42.2272	48.7135	44.0075	54.624	56.6813	39.248	54.0293	35.9856	62.8617	68.1846	70.0285	41.3408	94.9822
GPRC5A	5.94015	5.9823	0.997601	0.904708	0.872657	0.984967	1.29789	1.16803	1.24699	0.750214	1.00459	1.18808	0.981617	1.17958	1.16647	1.06325	1.09436	0.844667	1.17847	1.24772	1.07709	0.770589	1.33738	1.06462	10.7983	2.44274	25.5964	216.128	20.8255	20.7336	3.28312	15.5497	9.9381	5.98129	189.912	2.89442	66.6854	27.6968	7.57969	16.7378	134.951	14.6977	114.32	35.8621	36.4852	46.7824	242.022	24.4838	6.3344
GSS	6.99963	7.08568	1.02594	1.01098	0.951077	1.14704	1.11085	1.10494	1.02735	0.679289	1.16172	1.05878	1.03432	1.05881	1.05615	1.04688	1.02374	1.02266	1.07622	1.04525	1.00651	0.817624	1.0965	1.02679	94.7971	9.96684	58.8835	46.2175	35.4321	40.9396	68.209	40.745	66.4487	64.6789	168.9	15.9382	42.6797	33.3757	33.7408	35.3669	66.0486	35.4368	207.172	26.6711	115.748	56.5785	57.2168	29.0261	89.7279
TMEM173	8.1635	8.83912	1.05645	1.12565	1.10729	1.05543	1.14569	0.991738	1.03636	1.03498	0.841985	1.08243	0.880639	0.98701	1.02307	1.02134	0.937631	0.98078	1.06139	1.04315	0.996266	0.974113	0.863529	1.01176	36.5598	2.81099	96.1504	118.937	38.3228	80.1065	34.2621	55.9885	81.9548	56.9581	157.187	20.3877	129.94	20.3715	44.0844	83.8879	25.0531	50.5327	31.7737	23.8176	56.3608	85.05	36.1322	12.6332	9.80432
PTP4A2	8.7222	8.65349	1.02846	1.00628	1.08185	0.987204	0.974717	1.02625	0.964384	1.03764	0.893045	1.00364	0.872703	0.918379	0.939128	1.01244	0.971203	1.01401	1.0396	0.999451	1.05557	0.995221	0.93262	0.988275	54.8505	25.2517	69.3226	54.8933	29.8028	25.6813	45.524	39.5077	70.0354	62.9804	139.818	57.084	62.5796	34.767	27.9185	53.5147	60.5736	38.6514	72.2273	33.3904	73.994	51.4651	128.13	21.1731	35.6714
TAP2	6.74231	6.58188	0.875742	1.19763	0.981593	0.990008	1.25102	0.979924	1.02732	0.83374	1.04523	1.11456	1.46751	1.12116	1.13631	1.13002	1.0956	1.18149	1.08921	1.02148	1.01928	1.29028	0.935793	1.085	59.6656	2.85854	89.8673	59.4303	26.1699	28.8039	101.358	36.0541	142.241	30.4092	62.0895	7.47824	181.643	25.4269	109.034	85.4188	150.455	55.6518	118.638	29.6389	28.4528	39.132	79.787	15.5987	20.3741
TMED4	8.47551	8.47479	0.979898	1.01712	0.979932	1.01339	0.961108	0.907522	1.04508	0.971514	1.06204	1.05391	1.07903	0.991015	1.02468	0.985353	1.0775	0.979543	1.01101	0.94883	1.02985	1.08161	0.937104	1.00653	61.581	36.6157	55.5238	67.7377	75.873	33.9163	100.848	36.454	34.9117	55.2848	98.6797	46.5561	51.2272	28.1477	29.4191	41.0456	54.8401	28.8643	46.1052	25.5296	87.6802	45.2275	91.5707	27.8463	130.12
BCKDHA	7.31498	7.44857	1.02133	0.950157	1.0195	0.94259	0.946272	1.02627	1.01107	1.01843	0.985044	1.02011	0.977886	0.94771	0.934935	1.0009	0.995376	0.943686	0.938533	0.893815	0.921634	0.993248	0.930742	0.972345	35.1417	20.0761	52.892	46.9605	80.9089	88.5755	46.4496	85.6013	35.2343	68.5935	78.1762	78.2723	73.8892	56.5664	46.8388	39.339	22.2075	49.8633	35.9943	42.5114	27.2697	70.4152	54.6387	30.8832	42.7062
HMG20B	6.01438	5.90558	0.999054	1.02675	0.992075	1.09413	1.16783	1.1058	1.11198	1.05099	0.977166	1.04102	0.989311	1.01851	1.01883	0.997626	0.961987	1.07455	1.0132	1.08934	0.98492	1.02505	0.951672	1.03294	73.5265	21.1066	71.9105	58.4514	94.2022	28.6138	140.923	38.6036	62.2294	78.5013	90.1553	21.3779	51.4515	33.8307	27.6379	39.0557	60.0158	38.4586	92.7337	34.5379	131.319	43.5389	52.5897	41.4103	90.79
COASY	8.19002	7.93641	1.02458	1.02088	0.969034	1.01653	1.09938	1.08294	1.0167	1.03509	0.95093	1.06332	0.877395	1.00781	1.01547	1.01581	1.04251	0.975135	1.03524	0.984681	1.02469	1.01921	0.92123	1.00946	58.337	22.9953	42.2332	65.8376	75.5546	54.0763	84.5964	44.199	53.8779	58.1891	68.8194	19.7363	45.6458	36.6165	46.3079	44.0025	102.438	51.7945	50.6567	38.2418	86.3291	73.1714	69.3265	37.6383	87.475
LCP1	7.9702	9.33963	1.08403	1.27228	1.07199	1.20261	1.18574	0.869408	0.965568	1.07513	0.955753	1.05467	1.02137	0.839272	1.02493	1.0153	0.974921	0.929161	1.1011	1.10497	0.978419	1.02217	0.934141	1.03252	116.354	16.4802	89.7056	18.9686	22.4235	21.5931	29.3982	54.8738	124.66	71.7289	169.222	9.58125	159.939	26.948	46.1609	66.3008	2.69244	24.8361	137.804	56.9438	147.758	25.8749	40.9365	12.3932	10.243
SYNE2	6.7435	6.49691	0.962278	0.964632	1.02318	0.906415	0.909651	0.985277	0.963432	0.980316	1.04675	1.17076	1.26975	0.994545	0.861283	1.00424	1.05513	1.06521	0.957388	0.86658	0.932914	0.819442	0.972832	0.986286	42.9344	13.5688	130.68	65.1765	19.3295	39.8332	43.4575	41.4533	55.0262	65.4695	75.0089	68.158	57.3263	31.7427	30.6625	54.5358	97.1566	40.8934	93.6802	48.5856	64.5682	64.104	70.5687	15.8368	26.27
DDRGK1	7.40675	6.90797	1.00658	1.06099	0.978218	1.01602	1.11463	1.02078	1.04291	1.00203	1.06391	0.935407	0.882518	1.01524	1.02308	0.977992	0.966266	0.970958	0.943638	1.00273	0.999944	0.847083	0.896571	0.988929	57.1638	23.6816	47.6338	68.0941	41.2886	44.7677	88.6661	49.1818	58.7429	57.5378	58.5875	25.8122	65.1122	29.8239	48.6806	47.7008	114.137	51.8823	50.2488	32.2558	75.1205	48.8547	49.4804	31.8997	256.653
CCL5	7.39606	7.7858	1.24079	1.38084	0.97274	1.09365	1.17897	1.05748	1.03891	1.09757	0.908132	1.08971	1.03049	0.973231	1.05142	1.06265	1.05299	0.858282	1.152	1.15477	1.0779	1.09439	0.984735	1.07389	49.6168	11.4832	159.145	42.4834	11.8039	10.0301	59.8035	26.7436	218.172	9.49278	112.481	5.69681	347.044	28.8277	40.8296	90.6662	27.7085	16.6811	76.0391	38.3265	5.42552	7.12633	26.4951	4.16153	8.62838
PLAUR	6.32626	7.11771	1.20026	1.1746	1.12511	1.37855	1.26299	1.18227	1.19751	0.905815	1.09738	0.93361	1.29444	1.21191	1.22158	1.00124	0.988997	0.932478	1.03444	1.14815	1.27766	0.989998	1.23018	1.13282	164.005	2.20525	131.355	38.2268	106.653	6.54904	72.1244	79.4842	86.4639	27.4895	100.861	4.48714	83.415	8.44113	9.75939	21.3619	62.8517	97.2873	107.695	3.38846	62.5451	6.06094	150.782	21.4797	31.2877
COL5A2	7.70485	10.0904	1.11511	1.27238	1.30364	1.45619	1.05811	1.50787	1.26118	1.07135	0.946032	1.10017	0.91465	1.13814	1.10581	1.0735	0.953631	1.09561	1.17586	1.14633	1.08125	1.04673	0.872316	1.12837	71.8304	0.420547	284.285	0.853498	107.526	2.78897	35.079	10.5687	11.1538	44.002	52.1696	8.05314	252.855	2.92401	2.67275	8.25811	32.5118	1.77088	119.781	5.11357	26.2236	2.22151	91.9771	4.12287	33.1268
YPEL3	7.11448	6.0309	1.08224	0.922202	0.966023	0.929282	0.893482	0.947375	0.887832	0.857203	1.04902	1.08846	1.38523	1.03598	0.914009	0.944138	0.726379	1.13395	0.865582	0.814458	1.06356	0.680265	0.80081	0.951785	55.7968	20.6272	102.471	68.6552	28.2	39.2691	56.7495	53.56	40.9463	96.1485	87.1957	63.5954	77.9726	48.3147	32.955	36.0017	47.7707	61.5979	42.702	49.0025	50.4725	43.3244	42.8616	22.7119	26.2982
NSMCE1	8.14657	8.06522	0.997355	0.937369	1.01415	0.978143	0.956756	1.07204	1.01	1.01623	1.07229	0.965157	1.09956	1.02948	0.975745	1.00152	1.0078	1.01417	0.932874	0.957483	1.12025	1.06686	0.905193	1.00621	69.9732	19.6207	58.2302	53.1179	79.5145	35.1444	80.072	48.3048	57.994	57.0645	62.1177	34.5266	57.7072	39.3907	42.0071	37.5404	56.0675	39.1907	42.4683	43.9356	85.6804	54.1179	48.3053	40.5643	61.0744
SPON2	6.0589	6.90973	1.30065	1.01762	1.05641	1.22338	1.09889	1.14043	1.15649	1.00218	1.11341	1.14872	0.744683	1.08841	1.11963	1.05412	0.830046	1.12459	0.981371	1.09542	1.13139	1.05595	0.755695	1.05902	21.3785	2.62987	121.839	55.9733	156.863	25.6177	42.0233	53.7777	54.7039	36.7315	49.597	22.2499	131.469	10.7473	12.5521	13.294	118.337	9.89898	52.2	29.2503	39.6364	11.461	42.3845	23.564	38.2733
C5orf32	6.94111	7.26831	1.21908	0.979858	1.10839	1.00339	0.929489	0.904456	1.00719	1.02711	1.09854	0.861963	1.06834	0.967749	0.857205	1.00974	0.909311	0.873412	0.97514	0.813041	0.958012	1.00972	0.878264	0.974257	86.553	29.3145	59.2014	228.065	77.5817	14.2058	37.2204	34.9149	18.6673	60.1652	114.702	108.223	27.7247	16.0637	5.97132	33.3308	47.6323	31.6312	48.7984	49.9139	58.1983	16.9352	92.7269	25.5167	91.1807
DDX21	7.94334	8.24893	0.943906	1.13615	0.964175	1.01555	1.20763	0.840825	1.0955	1.07318	1.05708	0.989076	1.09973	1.06152	1.10316	1.03389	0.980342	0.960827	1.0531	1.12435	1.04303	0.941139	0.884423	1.02898	34.499	3.97852	57.4633	33.1513	68.2154	38.9907	70.8193	38.8245	61.8876	54.4911	113.318	13.596	39.1799	54.1119	31.4579	53.7934	77.6398	32.3796	90.6343	32.4478	93.6898	112.399	49.0099	58.6802	73.3476
OAS2	6.68632	6.96306	0.925764	1.37308	1.08204	1.02225	1.36905	1.29915	1.0927	1.10396	1.02349	1.21265	1.14416	1.01752	1.11693	1.11059	1.02178	1.02797	1.20132	1.02818	1.04922	1.0954	1.13298	1.11668	43.1017	8.0638	83.9211	42.1905	8.07295	15.5255	78.2709	23.2589	273.836	15.0395	62.4146	6.69814	260.647	18.6065	74.3102	86.6021	97.8478	27.5791	140.584	23.8931	81.4905	22.221	44.8568	8.06585	6.94688
SFRS4	9.88755	9.95804	0.975266	0.980512	0.979789	1.03648	1.04422	1.0135	1.00465	0.996085	0.998111	0.947103	0.957375	1.00495	0.989701	0.985145	0.948024	0.930101	1.01675	0.99615	1.04373	0.97285	0.87515	0.985507	51.4059	9.78167	78.3017	50.401	39.9977	35.8819	64.2969	35.7881	69.5974	55.0989	117.668	27.3629	59.1054	47.0007	34.7864	44.1073	96.8767	53.1177	77.9959	37.9832	88.1068	60.0411	75.388	27.8272	62.1649
PMF1	6.69675	6.75261	0.941765	0.951566	0.953532	0.980389	0.938495	1.00834	1.01746	1.05089	1.1497	0.9332	1.13956	1.02911	0.913818	1.00428	1.02758	0.956397	1.05666	0.949381	1.03338	0.846446	1.01522	0.995103	84.5802	14.8895	62.1689	37.6634	57.2262	41.2404	134.496	51.1707	50.2679	59.8288	81.0334	43.1367	50.2994	38.7956	33.8411	43.831	35.4858	33.6958	54.4826	42.3514	65.5066	39.2761	70.4176	38.8683	68.2494
REEP5	10.1984	9.39411	0.873599	0.958132	1.01945	0.90722	0.840845	0.973431	0.955841	0.990465	0.904253	1.0043	0.77204	0.902668	0.984081	0.998248	0.9613	0.967476	1.08918	0.978862	0.974077	0.99121	0.917354	0.950668	59.5065	54.8485	71.6841	62.8415	69.1711	32.0059	63.6471	39.9609	97.5327	81.4986	86.7923	63.2656	55.4343	30.6772	38.0114	61.4926	37.571	31.9739	38.8358	35.2865	30.9574	45.2166	55.8252	26.792	39.9614
THOC3	6.51835	6.28189	0.885151	0.957254	0.893145	1.04331	1.22974	1.02261	1.04297	0.733047	1.03236	0.929956	0.798886	1.02269	1.11775	1.03324	1.02811	1.05192	0.864929	0.979193	0.968342	1.08123	0.873406	0.98044	49.0315	3.50546	79.8007	53.3897	57.983	30.5043	58.1703	31.4183	62.325	46.6255	96.908	10.249	37.8389	57.0171	36.0794	41.6742	33.7531	60.9073	40.3542	29.1691	46.2996	59.387	128.722	69.4595	167.755
FAM195B	6.34581	7.17594	1.1517	1.09276	1.10185	1.20377	0.925242	1.09478	1.00579	1.00471	0.922696	0.89365	1.01558	1.01405	0.990466	0.977214	0.940781	0.887583	1.00318	0.948557	1.03052	1.0118	0.781952	0.999935	78.3643	24.212	136.199	39.1181	49.561	21.4614	57.9853	34.9899	52.2035	87.755	56.5413	60.6162	83.7002	16.453	15.4475	31.9246	22.4569	23.4425	88.2609	27.8501	80.088	27.4579	50.2247	22.3381	31.9316
TMEM43	6.13617	6.10657	0.915447	0.983195	1.02096	1.01775	0.96139	0.947024	0.939781	1.06436	0.958133	1.01374	0.976084	1.02503	1.00294	1.00747	0.904305	0.998568	1.0816	1.05737	0.988666	1.00909	0.950623	0.991597	48.459	5.4268	79.5407	35.1082	51.4068	46.1218	43.0449	42.4043	62.5589	79.4684	122.153	31.2972	66.7742	50.765	29.4998	38.9055	55.5356	44.7378	71.5839	49.4265	56.5115	97.3352	57.0608	38.6356	54.1753
XIRP2	5.5295	4.65477	0.841806	0.77532	1.08588	0.674222	0.577455	0.991249	0.829884	0.856182	0.501001	0.834087	0.592163	0.649886	0.643209	1.08324	0.707877	0.727631	1.00191	0.564807	0.808891	0.854359	0.774232	0.779776	0.533239	0.0200127	1.65089	0.367464	2.39399	0.00746665	0.0195832	75.0662	0.0558503	0.018902	0.015608	269.534	1.19807	12.1853	0	0.0104321	34.7255	66.7033	25.8925	154.754	0.00929603	0.0338301	122.39	27.9546	0.996548
MRPS26	7.26265	6.45186	0.93814	1.0218	0.962966	0.977072	0.976217	1.03141	0.944537	1.3434	0.907973	1.03908	0.738222	1.01513	0.966929	0.959176	0.734147	1.11552	1.1052	0.882406	1.00368	1.08252	0.7333	0.975182	49.1038	15.3361	42.9575	54.1669	54.0977	37.5982	121.496	40.4098	48.5456	68.329	75.1648	30.1773	36.8563	37.8538	40.2675	38.6181	107.88	41.0514	64.0221	33.0114	88.4546	62.8945	50.222	47.9534	246.965
RIOK3	8.31006	8.53847	1.02409	0.85731	0.889679	0.963699	1.47035	0.946531	1.04704	0.978242	1.00527	1.06437	1.04835	1.04859	1.01785	1.03339	1.00031	1.00611	0.982063	1.15183	1.00981	0.943862	0.98721	1.02266	35.0232	10.8787	52.9067	49.0433	38.8589	59.6365	49.3943	43.6015	50.79	37.6488	62.2669	28.8892	47.3816	68.6858	46.6885	44.5554	71.7718	42.9677	70.438	45.1495	30.8784	69.8117	80.409	29.2951	89.6063
UBA2	6.63767	6.40489	1.00153	1.03722	1.02167	1.0557	0.960525	0.911265	0.997075	0.915932	1.10343	0.893955	0.817212	0.980243	1.02364	1.03319	1.05005	1.04925	0.857872	1.01705	1.05063	0.981194	0.950259	0.986138	44.9563	14.0397	57.496	37.4254	57.5072	31.0929	61.9414	35.5404	61.8897	65.0141	112.786	29.963	50.3301	42.9223	27.2354	41.1222	62.5559	39.298	75.4182	36.3372	43.2953	57.982	94.3109	37.6179	98.9833
BASP1	8.77811	10.992	1.0257	1.07014	1.04542	1.2087	1.2522	0.999389	1.11232	1.11479	1.08045	1.08393	1.04938	1.13131	1.24512	1.0517	0.986073	0.956024	1.09287	1.27153	1.09252	1.04341	1.13559	1.09755	23.9558	0.704172	171.753	84.6674	33.0809	6.44126	243.923	23.7067	76.7327	67.5767	50.9438	5.35348	91.4542	16.2878	57.8432	29.4098	13.5947	14.6617	163.469	18.5528	85.2986	10.6477	111.992	22.7922	6.37478
PIN1	9.01634	9.15372	1.03932	0.99956	1.00227	1.01467	0.945395	1.02107	1.05608	1.00943	0.893608	1.01181	0.92406	1.0381	0.987768	0.979833	0.938111	0.943844	1.03777	0.913465	1.01111	0.995945	0.767833	0.977669	109.276	13.7488	69.4583	71.4532	94.9365	37.9073	68.6283	51.0245	56.4192	56.8525	78.8212	40.3276	52.9517	38.2776	35.9331	35.0721	62.0516	33.8387	67.6459	42.922	106.143	38.6821	36.5759	37.9701	74.0057
IK	7.26204	7.43187	0.970112	0.983342	0.982218	0.905706	0.979851	0.896819	0.991575	0.873516	1.10562	0.911131	0.972723	1.02334	0.995115	1.03126	1.0416	1.1714	0.901878	1.0163	0.971457	0.831883	0.914435	0.974824	66.1245	15.43	73.3651	139.753	54.9825	54.4136	63.6411	57.3101	64.7987	69.5823	104.426	38.2746	58.0383	57.0936	42.217	69.4218	46.1219	57.0646	50.1711	55.1681	33.0987	59.0332	82.9691	41.9559	48.9217
TLN1	7.28353	7.38696	1.11398	1.06652	1.15263	1.13534	0.931779	0.966832	0.985464	1.02436	0.916213	1.01874	0.919283	0.975847	1.03117	0.972648	0.958159	0.957977	1.1074	0.983745	0.985446	0.984012	0.717671	0.995487	54.9495	12.7537	132.891	34.0256	69.0793	32.3238	83.3954	41.2334	69.3678	70.3213	105.263	55.3142	94.9903	22.0207	16.4884	46.8449	51.6327	31.3939	88.2112	34.4742	33.5334	51.8581	84.5155	15.6356	51.9558
GBP1	7.13753	8.32949	0.869568	1.45344	1.09506	1.11759	1.31407	1.08156	1.12252	1.08121	1.03884	1.07249	1.2521	1.05927	1.09275	1.1281	0.963792	1.09455	1.12533	1.0933	1.03062	1.07579	1.11838	1.10859	24.169	2.3389	105.9	47.662	9.54703	9.14132	101.347	34.4587	344.338	25.9057	83.1361	5.55433	320.002	44.9044	112.3	115.859	8.65975	65.1783	286.601	46.8982	18.1589	14.9764	62.5061	6.83198	4.81815
BTBD2	9.60213	7.86342	0.986376	0.949902	0.987406	1.0252	0.964404	1.00896	0.936639	1.00638	0.903988	0.996816	0.911383	1.00995	0.989092	0.95459	0.97186	0.986215	0.909853	0.960192	0.96741	1.00652	0.709626	0.95918	63.7813	15.7055	74.4449	46.9397	106.572	46.2835	37.4857	43.904	40.6318	60.3034	62.5731	36.8829	44.0689	28.328	36.9121	34.536	46.7424	35.3219	92.4725	32.4304	96.7475	63.2107	42.9158	23.7138	94.7748
GOLGA2	7.40823	7.24115	1.00743	0.935017	1.02827	0.976449	0.99015	1.07714	0.978579	0.904693	0.959213	0.959735	1.05033	1.00573	0.975827	0.997825	1.05205	1.05207	0.893998	0.967976	0.974493	0.966535	1.03589	0.989971	76.4862	20.8357	87.1919	47.9885	61.8366	56.7267	40.0997	62.1477	46.7594	67.3244	71.1006	30.4403	58.0254	56.6739	49.6086	54.0875	61.6175	41.7966	58.6228	49.4029	93.1887	60.5085	66.8528	36.4194	62.7311
PAICS	7.84323	8.55795	0.923215	1.02848	0.942363	1.05422	1.11692	0.956394	1.04128	1.08386	1.17966	0.978482	0.89047	1.08434	1.12536	1.04077	0.938221	0.983498	1.12022	1.2919	1.01582	1.04352	1.10525	1.04496	89.0379	7.53304	43.2642	30.1261	34.283	31.511	51.4218	29.1265	80.3591	41.5976	93.105	12.5916	31.1437	35.7502	27.2068	36.4509	94.9701	34.6745	87.6663	35.4076	126.257	67.4142	89.0559	32.5183	80.9847
MPG	5.91817	5.86167	0.984363	0.990453	1.00433	1.00247	0.993863	0.998	1.0056	1.18186	1.07916	1.03419	0.88574	1.03894	1.00928	0.995594	0.974446	1.09522	0.986518	1.00195	1.04033	1.06099	1.05814	1.02007	118.555	23.3085	80.4205	53.3041	73.9899	33.2596	30.5438	41.8869	63.005	57.77	50.5698	34.8939	52.1456	25.9012	30.387	40.0802	96.6859	37.2346	50.4216	28.4182	83.1388	36.5321	62.5968	31.3918	56.924
MFSD1	8.67815	9.29151	1.00011	0.980119	1.00912	1.05773	1.1846	1.00589	1.01619	1.03937	0.922634	1.0067	0.806614	0.987323	1.06095	1.02124	0.939144	0.97495	1.1293	1.15299	0.977389	0.989767	1.0074	1.01284	87.2983	22.5207	75.2965	55.9965	62.3801	58.554	72.0176	66.5419	63.9559	70.3785	86.2407	25.1334	68.1728	56.475	56.4804	55.6978	23.3833	41.0256	38.8881	43.2857	30.9113	79.6454	62.2164	46.1775	48.6725
TWF1	6.18082	6.33339	1.04498	1.01657	0.936111	1.06192	1.12541	0.921607	1.07481	1.00428	1.09503	1.0024	1.09797	1.0568	1.14112	1.06099	1.02285	1.08357	0.953294	1.16413	1.02562	1.03949	0.922412	1.04054	34.3483	8.28602	58.5498	45.2467	55.4532	65.738	31.4866	44.6791	86.613	46.2242	84.8692	8.89304	62.9469	66.5631	64.9046	74.5637	75.3697	53.8993	79.9217	38.4441	48.2611	83.8452	55.8727	54.334	74.2033
CFD	10.4193	8.28281	0.797723	0.715619	0.950011	0.809045	0.76895	0.794951	0.774211	0.916088	0.847298	0.854753	0.800044	0.835754	0.787537	0.854544	0.882628	0.90091	0.879469	0.775231	0.846623	0.918461	0.854364	0.836391	11.1808	18.525	14.6907	51.6069	17.508	108.174	8.35639	213.49	9.79241	193.765	7.47155	158.286	20.2285	17.5952	5.39886	20.6727	37.6986	19.442	28.357	16.5412	26.8209	84.0611	25.4722	14.0181	14.9915
PIH1D1	7.29503	7.09995	0.975387	0.973259	0.970015	0.975311	0.938547	0.985754	1.00281	1.0153	1.06488	1.04237	0.987695	0.989247	0.975415	1.00616	1.06427	1.02139	0.873928	1.03067	1.02558	1.12501	1.19365	1.01127	38.4512	19.0261	51.7613	59.8375	66.2603	50.641	113.458	51.1683	61.8225	59.193	76.1653	30.4008	63.9189	44.483	46.5031	46.2164	59.5004	49.8376	59.2019	46.1244	41.671	52.2148	63.8146	41.5893	70.016
NPEPPS	7.52394	7.56414	0.994923	0.929139	0.995502	1.0159	0.949952	0.953149	1.01635	1.01409	1.08587	0.940014	1.11296	1.03027	0.953236	0.987286	0.983738	0.949435	0.927115	1.00525	0.998372	0.904973	1.00056	0.988004	41.4269	6.30436	31.2029	37.6676	33.446	100.979	29.2991	56.7968	38.6779	49.9077	60.7198	35.6036	54.4176	93.0072	64.4433	72.8809	59.9593	62.0707	55.2923	48.8028	38.0635	101.487	58.4286	56.7978	60.1874
IRF1	7.03263	7.50787	0.964759	1.38387	1.02403	1.15179	1.37033	1.00246	1.10778	1.249	0.967749	1.27261	1.50377	1.04192	1.10255	1.06423	0.984201	1.1983	1.19958	1.09703	0.993085	0.836896	0.869597	1.1136	40.3429	5.6513	82.7358	170.196	18.2109	14.4456	160.34	36.067	154.044	22.9649	127.049	12.4188	194.67	38.9249	75.1562	87.8171	15.6639	47.2414	97.6245	36.5516	20.4102	15.5189	73.1564	7.65788	4.06823
IL4R	6.65425	7.10437	1.00863	1.12751	1.03296	1.06385	1.28512	1.15339	1.04423	0.796869	0.909242	0.970519	1.2274	1.05022	1.08989	0.969487	1.02555	1.08737	0.858032	1.01598	1.15231	1.03668	0.771311	1.03222	47.3871	1.12689	73.9128	42.4957	10.4249	72.2722	86.4407	48.2291	97.9249	63.1675	118.713	4.12051	84.8807	42.1606	52.7019	62.3478	57.4463	69.0972	85.4452	19.848	108.372	97.9571	135.465	42.0668	12.1035
P4HA2	6.99334	7.81559	1.11051	1.00863	1.08399	1.17829	1.1055	1.24308	1.22338	1.01804	1.29081	1.10484	0.84327	1.16912	1.20335	1.04397	1.05571	1.26388	1.08332	1.25222	1.03751	1.19864	1.06111	1.12282	75.9001	16.4084	145.807	26.1081	95.7034	20.9497	51.6909	18.7281	49.8231	32.3739	70.6872	23.3512	146.488	14.2699	13.028	20.0385	84.6089	22.256	102.61	19.953	96.3422	21.868	173.254	14.2366	60.4992
NME4	8.31928	7.7112	1.01154	0.98666	1.0974	1.15905	0.881968	0.963716	0.89891	1.03394	0.938203	0.940057	0.85436	0.988241	1.02469	0.964974	0.982035	0.942494	0.97886	0.950446	1.0227	1.01123	0.967094	0.980885	154.244	34.0209	56.5385	43.4418	72.357	22.5923	40.3472	30.149	10.7973	56.7071	34.2487	34.1766	46.3963	16.6291	16.0915	37.537	46.865	15.076	34.8509	16.6626	60.9707	49.8078	79.1738	21.9752	75.5854
DHX15	9.21478	9.3427	0.973871	1.03598	0.996637	1.04174	1.08689	0.916738	1.02642	1.03419	1.20108	0.989557	0.979748	1.05477	1.05129	1.02616	0.988038	1.00012	1.07512	1.10429	1.01851	1.00869	0.90006	1.02428	43.7155	8.12771	52.4015	47.8713	35.2911	42.8584	77.146	43.5795	71.2974	65.4245	103.808	17.6587	54.8753	53.2919	38.2215	53.6873	69.8595	50.0082	104.919	42.3396	94.648	86.7155	80.1047	37.3885	55.6519
CCL14	7.58022	5.49554	0.672186	0.765365	0.97528	0.821747	0.815693	0.737841	0.784454	0.794516	0.604171	0.60954	0.673579	0.786766	0.747358	0.983363	0.983756	1.04085	0.767894	0.802508	0.844429	1.04455	0.733711	0.809026	1.75006	9.61344	88.8457	10.2911	4.26143	51.6782	0.748157	156.819	1.40613	368.327	57.6199	233.617	44.2357	36.2814	8.19012	310.794	17.3264	60.3658	47.3844	70.6855	1.26679	49.7685	1.90344	13.7322	5.59637
NR1H2	7.18469	7.25625	1.04182	0.993601	1.03905	1.00988	0.883862	0.991002	0.982539	0.888427	1.01614	0.958358	1.05819	0.992069	0.963034	0.966574	1.13078	1.03061	0.95856	0.978656	0.986233	0.92818	0.79697	0.980692	47.9827	13.6492	73.2867	58.2332	89.2068	42.5462	55.4518	54.011	49.1959	56.3864	77.0032	42.6346	80.4808	37.7732	37.4392	44.4499	50.8591	52.5878	69.3463	43.0435	39.1799	46.7966	67.9817	43.028	62.1469
RAPGEFL1	6.81374	6.98538	0.994748	0.897495	0.793859	0.945879	1.38848	0.825612	0.914636	0.660236	0.89376	1.15081	1.13288	1.03823	0.982208	0.97475	1.21135	1.11328	0.653839	0.938922	0.932102	0.92056	0.678604	0.954393	50.0186	1.88834	25.7374	68.3935	93.4793	85.5325	34.5134	88.094	37.1504	63.556	66.1703	0.606599	29.6374	80.9919	83.2998	48.2718	99.5099	72.6114	10.4806	72.1585	41.9925	120.796	28.3345	40.8307	78.6815
FCGRT	8.74692	7.96534	1.00743	1.03446	1.11294	1.02038	0.87636	0.878666	0.929552	1.00987	0.867558	0.94685	1.04199	0.954808	0.853246	0.961883	0.916364	0.92689	1.04874	0.822379	0.91336	1.00033	0.880697	0.952607	85.4614	28.4524	118.614	63.9148	22.3822	36.4433	47.1794	85.2539	42.4801	141.607	105.725	94.386	97.3721	20.7165	19.3045	53.4873	5.84164	18.3318	34.8689	30.4351	11.5135	39.6686	67.1352	16.6554	36.0613
CHMP1B	9.10794	9.29952	1.12943	1.01186	1.04114	1.00002	1.06764	1.01389	1.01998	1.00908	0.980584	0.997485	0.934025	1.08274	0.987105	1.0482	0.929449	0.936969	1.02912	1.01523	1.01211	0.977541	1.03869	1.01249	40.7491	8.17878	83.4784	77.7827	122.128	35.3907	73.7699	74.3955	38.8174	87.8599	105.896	47.6417	48.3208	49.2116	30.5699	34.975	63.5789	58.438	51.4554	36.6368	44.7683	30.8439	57.5164	60.3046	81.5674
CAV2	7.51954	7.64146	1.0011	0.947482	0.973521	1.02155	1.12834	1.01621	1.15126	1.0015	1.01993	1.04669	0.711236	1.17969	1.16438	1.07761	0.974031	1.11856	1.0881	1.11208	1.09435	1.03463	0.954087	1.03887	32.994	3.82927	89.4882	19.6198	84.5793	15.1003	58.0491	29.4369	90.8739	44.1802	142.287	20.8184	48.5806	29.0323	32.7407	39.506	158.437	19.0705	135.479	21.3566	53.7752	35.1741	26.1802	29.5667	26.3879
NUDT1	7.37452	7.3577	0.976286	1.09811	0.962403	1.07917	1.04648	1.07772	1.01969	0.986814	1.16473	0.976764	1.06232	1.09037	1.05067	1.03245	1.0236	0.922252	0.924388	1.04985	1.02095	1.09338	1.14041	1.03804	105.686	2.72916	55.1564	18.8917	60.9197	29.3736	96.3966	40.8816	46.0853	48.0011	73.5581	13.0731	42.8813	34.4897	27.8118	32.7302	36.4	35.37	46.8539	33.9078	62.7896	30.4059	87.3609	25.5153	109.567
DBNDD2	7.55432	7.1155	1.04697	0.953855	0.977222	0.925751	0.971326	1.06644	0.928317	1.17379	1.06804	0.969929	0.801734	1.06634	0.832931	1.03017	0.930052	1.07497	0.951761	0.8656	1.07531	0.845738	0.824333	0.970503	57.1849	11.2706	77.3886	70.2049	42.8316	37.0605	117.649	41.6319	15.4615	51.6474	82.1053	61.6662	50.9141	23.7101	13.1635	27.4941	172.813	41.0736	78.2214	53.7476	93.5542	63.0212	114.299	37.0154	68.4258
MARS	7.00998	7.17023	1.02313	1.11448	1.0435	1.08234	1.06927	1.01226	1.022	1.42935	1.25107	1.03479	1.31671	1.04207	0.996395	1.02028	1.15871	1.17931	0.992419	0.923951	1.03304	1.17324	0.771803	1.08048	52.8059	10.6144	66.4801	50.1425	77.2632	43.8984	61.2426	38.4966	52.4511	45.1474	84.6667	25.2501	60.01	38.4199	43.9392	47.7699	65.1967	35.9254	90.9677	42.5692	57.4756	89.9852	71.4296	52.4081	164.358
PDLIM2	5.68414	5.72332	0.996521	1.02734	0.998824	1.013	0.993776	0.978141	0.985387	0.775147	1.08276	0.78871	0.947259	1.00235	1.02752	1.01368	1.09262	1.0485	0.784266	0.978664	1.006	0.979723	1.02799	0.978485	20.2185	5.47696	78.1094	27.7259	27.1255	175.102	6.79423	114.043	7.75136	75.966	45.592	18.4212	50.6279	72.0404	101.048	44.0716	63.4871	27.4425	28.4989	59.5142	10.6858	95.7486	42.5705	38.0686	12.8318
POLE3	9.75938	9.33331	0.916632	1.06681	1.00904	1.07064	1.01517	1.07632	1.03579	1.0428	1.03125	0.997303	0.907997	1.02215	0.995045	1.02664	0.927017	0.971225	1.07605	1.02714	1.01021	0.996332	0.895808	1.00559	79.429	10.8794	60.2516	30.3565	53.8047	37.4075	67.2596	32.2068	93.1625	51.7822	117.5	27.1094	44.3561	41.5446	15.8028	37.0339	79.0226	43.3775	68.1276	38.9922	86.6254	63.9324	79.809	39.8344	64.0746
KRT24	6.12004	5.79065	0.768707	1.16317	1.06771	1.05867	1.07926	0.651221	0.946197	0.799124	1.05305	1.029	0.910975	1.13497	1.00997	0.751708	1.66082	0.861269	0.596171	1.0084	1.13255	1.16683	1.52178	1.01769	0.174516	0.0169388	0.0506494	69.6088	0.029056	371.298	0	1.8903	4.12792	0.539697	8.83256	0.260031	1.18345	1.91855	347.708	220.664	0.77149	152.064	15.5519	0.0519655	0	98.3448	0.0378375	0.0257488	0.0533661
DUSP5	7.47273	8.66743	1.09734	0.905811	0.799889	0.888023	1.39735	0.963119	0.926652	0.977807	0.924354	0.969548	0.964838	0.992582	0.896111	0.956741	0.949414	0.906904	0.962351	0.985244	0.92809	0.907708	0.988944	0.966134	14.1024	2.54082	33.9238	243.157	25.3413	90.904	24.687	150.277	26.7409	34.2705	145.539	4.58148	25.6152	83.3815	37.1782	20.9324	50.926	97.5451	67.9313	35.8594	30.1703	40.8559	66.2147	100.34	22.6677
PRCC	6.33473	6.33151	1.01763	1.05195	0.99228	1.04778	1.03974	1.00818	0.99298	1.07034	0.876278	0.983865	0.881771	1.0224	0.9853	1.01774	1.05849	1.04518	0.86308	0.996769	1.03165	1.09504	0.920888	0.999968	55.9613	9.94315	65.0713	43.805	65.3285	35.9249	173.697	39.8861	67.721	58.4901	86.5442	24.0082	44.9748	39.864	37.2444	38.6587	53.9454	48.991	53.8733	37.9188	99.0283	57.5458	64.0185	38.0034	81.564
IFFO2	6.94526	7.38836	0.73097	1.05013	0.934894	1.18712	1.17895	1.1541	0.943417	1.10185	0.958919	1.22921	0.715281	1.22474	1.06756	0.944051	1.10727	0.990099	1.06653	1.1789	1.12894	0.909077	1.12851	1.04431	41.878	2.09956	16.7082	31.3295	21.2806	31.2028	14.8011	135.322	19.0872	126.015	47.0933	2.86031	65.4196	78.5389	58.7353	79.5274	55.64	111.687	75.7309	24.2004	56.7502	46.971	22.2746	38.7637	17.9635
ATN1	6.93972	6.72348	1.05011	0.955832	1.06655	1.02902	0.919887	1.12368	0.957864	0.986817	0.895055	1.03847	0.726974	0.986575	1.01465	0.97654	1.06438	1.05247	0.942439	0.952282	1.00112	0.752964	0.904217	0.971329	80.4047	21.7499	76.3605	64.1649	82.1874	36.4899	38.4297	42.6557	36.2522	87.0772	102.824	34.8685	59.1195	26.4986	29.0243	43.0451	51.6238	49.0286	69.8636	33.8765	73.1919	51.7938	56.5478	19.8833	98.4645
URM1	9.06288	9.05646	0.999305	0.974001	1.0336	1.0175	0.950296	1.03207	1.0241	1.02338	0.988189	1.00248	0.978822	0.966383	0.989079	0.960675	0.966944	0.980995	1.0695	0.977339	0.992758	0.941422	0.914226	0.989669	66.5094	16.6315	60.6296	51.6339	61.4114	41.9253	52.879	48.3015	98.6554	63.8087	83.0416	36.0979	62.0904	28.8233	35.312	44.5426	69.0378	45.3525	47.0801	35.296	63.7032	56.6747	43.9938	28.8572	68.5901
GALNT1	6.4755	6.69722	1.00404	0.974392	1.01063	1.05991	1.09384	0.904295	0.98069	1.13467	1.13553	1.01588	1.18645	1.01271	1.03525	1.02767	0.979892	0.950737	1.01026	1.17777	0.969795	0.833025	0.857591	1.01691	46.9129	17.0828	99.034	33.3701	44.96	80.1208	46.425	40.0131	74.8964	40.9441	69.2046	25.7443	61.3107	64.9095	48.8821	64.5976	66.2164	36.9362	86.5053	40.8087	33.7569	63.5849	111.627	38.4245	65.033
YME1L1	7.54085	7.1681	1.04588	1.03858	0.960798	0.98868	1.04309	0.846418	1.04226	0.985003	1.01201	1.01987	1.09564	1.03092	1.03965	1.01282	1.04323	1.02556	0.949129	1.00438	0.973043	1.00247	0.895946	1.00264	57.2716	14.3938	101.4	46.0038	63.3631	50.8048	62.2203	43.9485	62.2369	68.9679	56.1994	22.2721	52.3723	57.3081	41.095	59.6471	79.4145	48.7088	75.0279	50.6913	78.9909	71.3001	47.3446	41.839	52.3105
KIF22	7.8583	7.74802	0.984246	0.970286	1.00151	0.94644	0.933115	1.04593	0.984032	0.92108	1.10681	0.995682	0.932875	1.03135	0.848457	1.00544	1.21559	1.15189	0.930928	0.8478	1.11709	0.833384	0.803005	0.981283	101.238	11.5943	55.161	34.772	43.3404	33.8991	114.173	33.1332	64.3788	45.0624	116.736	56.651	43.3134	29.6949	25.7611	33.3422	77.7752	32.1889	64.3916	40.3382	65.6964	35.1553	68.1131	18.1386	87.9757
DGKA	6.44455	6.74996	1.0802	0.912836	0.93699	0.98946	1.20292	0.9681	0.959691	0.767081	1.00419	0.951089	1.09276	1.01596	1.09916	0.975996	1.06523	1.0774	0.866077	1.0491	1.05047	1.04674	0.900218	1.00055	39.2104	6.90013	35.6522	63.858	49.8305	77.6143	52.5539	56.8418	73.1423	32.9101	72.0267	4.79902	62.75	52.2949	47.4396	36.7866	99.5538	35.7685	83.6141	33.0538	26.0786	74.8792	50.734	36.8135	64.7113
EFEMP1	7.7307	7.05056	1.17354	1.01077	1.07774	0.995877	0.98186	0.891464	0.98601	0.952549	0.981769	0.869834	0.654137	1.02635	0.932531	0.987932	0.954118	1.03239	1.06082	1.04348	0.913153	0.986039	0.777078	0.966165	44.3453	17.9555	199.317	24.7985	13.4661	45.8967	9.49563	98.3498	26.2526	148.648	75.1049	101.015	89.4956	22.0431	10.5115	63.7579	70.6196	6.95989	108.974	24.8042	57.915	34.6366	70.2284	17.3636	9.30708
DCTPP1	8.82441	8.46271	0.879034	1.05263	0.994217	1.04607	1.00955	1.0801	1.00243	1.0244	1.11269	0.950611	0.996648	1.025	0.974245	1.02264	0.963749	0.935074	0.969983	1.02914	1.09761	0.997623	1.13065	1.014	98.8899	11.6698	50.1233	69.1643	66.9216	34.2492	70.7385	30.6981	59.3117	48.332	103.429	30.1198	33.3443	36.8952	23.2801	33.653	113.52	27.8111	70.1547	30.7908	109.166	52.7731	65.3218	34.678	100.736
C19orf6	7.63954	7.60899	1.03385	0.966977	1.01327	1.02828	1.02224	1.07207	0.915256	0.815405	0.966087	0.941058	1.04298	1.0101	1.00721	1.00541	1.04622	1.1329	0.860158	0.936691	1.0524	1.07507	0.907616	0.992915	49.5398	16.4868	76.429	76.6116	74.4746	47.266	46.6615	54.426	62.4479	58.9456	95.4118	22.6278	63.1435	32.7191	42.07	39.3846	48.3933	41.7387	81.9855	33.4418	99.9282	58.9858	55.415	39.9579	56.2002
POP7	6.90683	6.7975	0.874053	0.921423	0.99467	1.01536	0.962594	1.0624	0.966464	0.956023	1.04767	0.99652	0.940193	1.05059	1.03764	1.04289	1.01209	1.03185	1.04124	0.990496	1.02794	1.09151	1.10033	1.00781	132.598	10.185	51.3606	35.3814	60.7078	34.9965	93.8615	35.1718	60.624	51.4412	68.133	26.2674	34.138	32.702	38.7333	38.8426	98.2439	29.0256	50.666	38.0373	350.377	41.2302	59.6737	38.6155	130.917
DRG1	8.90009	8.41125	0.953584	1.00361	1.02376	0.974782	0.981485	0.945075	1.00692	1.10338	1.06423	0.930138	0.920038	0.961613	0.931833	1.06658	0.991651	0.942772	1.03649	0.977677	1.03674	1.01139	0.869276	0.987287	50.9509	20.2662	60.7401	46.8437	48.2095	36.427	65.1622	37.5141	66.1699	55.6483	79.9766	52.4566	46.2987	41.3393	31.6589	40.0666	67.1752	48.428	62.0928	41.7953	91.2467	47.2798	86.2656	38.993	72.2437
CASQ1	5.83987	5.30034	0.907614	0.675187	1.19728	0.623815	0.51357	0.919335	0.792084	0.900657	0.830141	0.900805	0.86985	0.761925	0.639841	1.04671	0.68672	0.990987	1.14007	0.611432	0.796983	0.611859	0.849549	0.82221	0.131203	0	1.05405	0.589181	0.570127	0.0538785	0.0591823	20.9398	0	0.583044	0.132037	506.31	0.285973	10.9328	0.0667575	0.0629867	4.39332	62.0861	9.73249	132.758	0.0479254	0.0385625	20.6897	15.9475	0.408497
CTSL2	6.31447	6.79687	1.3929	1.1549	0.755763	1.31103	1.48095	1.14781	1.26994	1.60576	1.21728	1.40866	0.889268	1.1691	1.4693	1.06884	1.2223	1.19703	1.21558	1.44636	1.14482	1.00703	1.39982	1.23688	119.589	0.443305	231.344	7.67008	12.19	15.2228	23.58	7.41709	81.8446	107.644	15.7892	1.04268	183.832	28.4864	28.6281	11.5706	142.044	1.60898	135.859	15.2131	214.225	11.0506	83.884	18.0195	11.6782
UBQLN1	8.62239	8.54659	0.959432	1.0869	0.99376	1.08356	0.997014	1.02572	1.01402	1.00144	1.05328	1.02299	1.01917	1.01916	1.01398	1.01424	0.979913	1.03836	1.04318	1.02738	1.02259	1.01294	0.935407	1.01736	64.4592	10.1978	63.7729	42.6443	88.6128	41.3616	73.1683	42.1345	76.1246	70.1974	111.233	27.1568	54.6456	47.5519	39.2122	57.149	72.1969	37.0877	67.331	40.974	74.3235	61.8412	76.1607	37.9602	84.9551
SCYL1	8.76004	8.54453	1.0951	1.03723	1.01041	1.03589	1.00189	1.04774	1.01328	1.01287	0.992641	1.1046	1.09817	1.0257	0.973363	0.954073	1.03387	1.01545	1.04694	0.966664	1.04913	1.02195	0.803254	1.0162	94.6859	20.3575	87.6303	53.9826	66.0259	38.3223	66.673	38.9921	54.8632	54.8779	82.6124	39.7843	54.8562	31.587	37.9975	44.0017	91.7051	39.0567	83.6679	34.0839	181.294	43.1809	74.6814	28.3481	79.6737
GOLPH3	8.50527	8.44511	1.03853	1.01641	1.07266	1.05363	1.03375	0.941938	0.992927	1.00814	1.03343	0.961398	0.904011	1.03797	1.04667	1.02647	0.944156	1.01871	1.04177	1.11956	1.00401	1.01999	1.05609	1.01772	54.0155	23.618	69.3406	67.181	59.602	37.3495	58.8965	34.8211	49.1358	62.4939	115.452	27.4087	56.8361	45.4363	32.1434	48.0565	106.137	37.3611	91.2662	32.5725	82.1352	46.2384	90.8022	27.3523	37.5805
SYNPO	5.71477	5.81039	0.985631	1.04004	0.99989	1.04455	1.00027	0.984582	1.05342	1.02702	0.951895	0.936955	0.978018	1.01767	1.0253	1.01823	0.906506	1.01632	0.945766	1.06651	0.996141	1.04097	0.952647	0.999443	27.5153	3.53625	89.8781	28.4997	45.7646	9.44625	54.7986	39.546	35.5101	32.3736	52.0423	184.488	81.6216	8.96377	4.71865	23.3944	29.9777	51.6823	86.927	73.0064	29.3206	12.497	105.462	12.6983	13.671
PDCD10	7.10729	7.5559	1.03138	1.02131	0.957782	1.10114	1.16953	0.939709	1.05276	0.957834	1.06696	0.999475	1.08507	1.0957	1.08916	1.03536	0.99379	1.03871	0.949389	1.0479	0.999764	1.02199	1.11126	1.03647	82.486	8.17602	62.2668	37.9799	66.0378	39.4218	59.118	32.689	55.4296	43.1843	81.3996	12.6541	36.0843	52.7369	32.2652	36.1704	46.8931	35.5827	62.991	31.9931	67.7845	55.8968	147.709	34.8684	80.675
CABC1	6.85817	5.8347	1.04235	0.739077	1.02358	0.64618	0.587018	0.857701	0.775545	0.611689	0.829376	0.848297	0.686553	0.739841	0.650691	0.964142	0.710751	1.03677	1.10381	0.6358	0.811546	0.759636	0.649995	0.795731	12.2545	18.9871	23.6634	26.5751	10.2166	8.89021	24.6183	37.0466	10.2887	25.9409	15.3027	323.978	10.9905	15.0097	5.19206	10.5411	18.9267	99.6543	51.6856	134.689	18.7803	7.7211	46.6113	13.5303	13.1614
RALGDS	8.52939	9.11818	0.958467	0.979195	0.971378	1.09641	1.15881	0.998999	0.95453	0.98491	0.907777	1.0236	1.00911	0.991578	0.979092	0.922439	1.02559	1.00866	0.967227	0.960415	0.963295	0.997619	0.93748	0.990313	47.962	11.006	61.5525	92.9534	65.0553	37.1739	34.7016	67.3991	42.0287	73.7602	112.268	17.588	45.3781	49.2852	25.9089	29.2886	67.08	70.9011	56.0778	30.9339	62.7634	48.0752	85.4756	51.1851	77.1323
COQ9	8.72723	7.96122	0.948306	0.883604	0.981095	0.842012	0.848329	1.05124	0.915931	0.958379	0.992434	0.95262	0.740607	0.95704	0.882375	1.01948	1.12375	1.0466	0.982811	0.844538	0.944555	1.08687	0.73212	0.939747	47.3191	23.0098	49.7854	46.4859	41.7549	46.7693	75.9098	47.314	46.7866	67.0729	73.7228	133.78	39.8084	40.8106	31.9654	33.2739	64.8525	61.7723	42.3384	58.0138	68.5228	57.0442	53.5431	37.6138	65.5017
TIMM10	7.35072	7.73875	1.0829	1.03038	1.01597	1.0256	1.05279	1.01926	1.01098	1.04355	1.01775	0.991263	0.966977	1.03381	1.01643	0.997137	0.937758	0.923561	1.09845	0.978719	1.04544	0.986862	0.935719	1.01006	54.3532	10.9789	52.4771	30.8511	67.4508	41.9323	75.9457	44.711	63.0507	72.3417	92.2615	38.7675	30.277	34.825	29.945	31.8487	51.6454	41.8335	96.74	53.6872	103.475	51.099	83.6464	52.9788	91.3193
TMEM9	6.05776	6.06896	1.06938	1.0437	1.01306	1.02694	0.972976	1.08272	1.03221	0.708924	0.79196	1.03963	0.769225	0.994588	1.06251	0.984995	1.38321	1.09569	1.03947	0.953476	1.06923	0.730411	0.802645	0.98414	75.3229	26.6653	49.3709	49.6747	127.115	31.1002	122.041	35.0583	29.1798	60.5194	77.9405	30.7795	44.8822	20.2556	37.7384	40.3652	58.1518	21.1746	28.8808	37.0876	121.45	28.8877	118.007	24.3508	94.0874
GRB2	7.3846	7.56574	1.04606	1.09417	1.0231	1.04237	1.02453	0.900124	1.01901	1.29156	1.1525	1.07069	1.29242	1.02659	1.04461	1.01861	1.01482	1.07476	1.00985	1.07037	1.02489	1.09949	1.12245	1.06967	95.5231	11.607	77.1528	56.3516	57.5334	38.902	65.3113	48.6458	69.5236	58.0531	97.5759	27.5199	69.8601	37.6601	35.866	47.6328	74.1106	39.3256	61.0781	35.5994	82.7029	52.7675	65.9323	28.9913	70.9442
CDC42EP4	8.96704	8.7007	0.902394	0.988485	1.02212	1.11754	1.07633	0.992759	0.953079	1.02888	0.990007	0.978463	0.853977	0.964639	0.956109	0.984477	0.92849	0.880948	0.99057	1.02885	1.04759	0.83774	0.937876	0.974348	96.968	9.60217	41.5071	97.5785	33.7075	27.1409	56.2289	70.7941	42.2487	100.338	223.999	16.5561	66.8539	19.833	32.9805	44.0713	55.0672	40.9445	71.9848	26.9668	81.4205	42.0197	85.3077	14.4697	61.5964
PHLDA1	7.40533	9.02092	1.20423	0.971293	0.89059	1.02779	1.23656	0.92686	1.25765	1.00932	1.06022	0.961378	0.984541	1.13385	1.1078	0.984516	0.994965	0.999581	1.03283	1.23002	1.00852	0.965262	0.959101	1.04509	32.4001	52.8616	44.8316	37.0734	19.63	77.9442	49.6539	38.1089	109.46	30.7203	63.584	28.0761	34.0349	45.2758	30.8652	30.2702	48.6767	64.8503	146.25	10.4193	133.817	55.9482	134.593	40.4029	46.0937
SAP18	7.59543	6.53759	0.84323	0.833137	1.02756	0.822476	0.789271	0.922409	0.898858	0.943039	1.02763	0.729827	1.11785	0.856314	0.80138	1.01694	0.920468	0.796006	0.778372	0.873328	0.954973	0.950576	0.818281	0.89152	62.5054	21.6805	71.7818	77.663	47.391	45.3528	57.4509	50.6016	78.2246	65.4879	69.4482	58.3385	42.691	42.99	44.6579	53.307	80.218	58.1807	56.463	57.9473	34.8935	60.6115	69.8218	43.6385	53.123
SUPT5H	7.67645	8.03143	1.00435	1.0149	1.04624	0.999004	1.00194	1.05182	0.987346	0.946352	1.04416	0.95668	1.07419	1.03049	0.981111	1.02214	0.988666	0.978983	1.0702	1.01248	1.06018	0.991195	1.06061	1.01538	38.7461	19.272	75.0507	62.6183	68.1977	45.5546	73.8521	42.3075	60.3275	59.1681	84.1716	31.3022	74.8133	38.4784	38.2731	47.3564	50.9541	47.891	74.424	38.7781	44.8202	60.4332	77.5413	36.6798	70.2763
PABPC3	5.78066	6.15138	1.09541	0.873077	0.922459	0.972116	1.15414	0.853487	0.970605	1.10806	1.20912	0.979624	0.992224	1.00736	1.00149	0.999314	0.990058	0.991251	1.0874	1.01497	1.00796	1.13891	0.993476	1.01726	37.6149	32.3894	60.011	46.5411	69.4327	69.0673	53.7722	45.7433	97.6083	68.6233	46.465	20.4864	59.2959	79.8615	41.2625	48.9003	45.6954	44.5256	70.1684	43.9869	37.0291	81.8126	42.2582	28.1419	109.921
BRP44	8.68635	7.90331	0.992865	0.976564	1.05331	0.999955	0.899961	0.873099	1.01216	1.01461	1.11961	0.919758	1.07953	0.987802	0.917261	1.0377	0.969703	0.925228	0.905866	1.0633	0.979854	1.04786	0.966136	0.987721	73.3699	36.6293	42.164	67.4541	137.004	32.1816	107.381	42.0852	54.4131	99.5028	88.0192	78.7668	32.4635	29.0546	43.7046	53.4178	30.2785	55.1154	39.2478	38.1909	54.9024	34.2598	57.479	33.0636	103.527
SMS	8.57932	9.42894	1.0997	1.08711	1.06871	1.17378	1.10122	1.05954	1.12759	1.21005	1.12366	0.980383	1.13498	1.07741	1.11248	1.00655	1.01675	0.98502	0.997242	1.12875	1.11078	1.03863	1.01482	1.07882	45.0556	7.58448	76.5464	58.2474	97.402	19.6961	60.8859	16.8803	89.6323	38.8107	70.0797	18.1076	46.5978	22.4036	24.6995	32.3622	161.123	30.9071	66.446	24.1864	116.718	26.5464	77.1942	15.4419	266.552
VAMP5	9.02024	8.44813	0.988555	1.10486	1.07222	0.887038	0.922745	0.947701	0.937106	1.03327	0.9758	0.856389	1.00356	0.890858	0.830184	1.014	0.885159	0.927709	1.01411	0.844012	0.961485	0.988429	1.0435	0.958509	40.3833	6.30638	94.2797	45.8105	23.0899	35.2442	43.3627	64.1579	71.2782	76.5944	50.1195	124.126	148.975	33.6986	18.1127	38.8012	64.0642	66.6894	45.2502	60.5436	83.9588	36.5046	54.862	27.9763	19.1501
C12orf44	7.79712	7.05757	1.0109	1.01088	1.03569	1.14324	1.07687	1.0341	1.01962	1.01208	1.07701	1.06034	1.01659	1.06424	1.02912	0.97804	0.96035	0.915089	1.06034	1.02473	1.04757	0.655741	0.937675	1.00811	63.0427	19.448	60.3661	70.7525	76.7017	33.3245	57.0297	50.9154	58.9855	63.4589	74.4997	21.0672	51.0884	37.8461	29.7573	34.3595	90.2573	52.7451	74.856	31.6034	78.4951	44.4536	102.644	39.7413	83.4473
COPB1	8.73082	9.115	1.00174	1.0445	1.02447	1.0345	1.10576	0.896772	1.03072	0.918821	0.945484	0.990621	0.902875	0.979252	1.08796	1.01146	1.00412	1.06212	1.06495	1.09047	1.04398	1.03166	1.0224	1.01403	40.974	20.7175	86.8941	54.4137	74.0278	43.9357	52.043	40.4837	102.789	57.9027	94.1803	26.7735	60.7987	52.4599	38.3028	64.7982	49.6649	38.2783	86.4092	32.9445	103.159	58.1808	103.041	30.32	58.9576
KRT23	5.99642	5.62492	0.934865	0.984869	0.815193	0.829815	1.13839	0.921595	0.836665	0.717829	1.06687	0.839857	1.07588	0.953738	1.09293	1.02664	0.991856	1.09689	0.761669	0.99066	0.925712	1.0596	1.0045	0.955525	3.10356	102.357	6.01478	109.193	2.84299	36.5951	0.939385	6.83703	4.03113	86.4693	93.5284	41.7746	20.6325	76.6359	35.1409	30.3552	91.4756	45.9354	5.57793	154.583	33.991	13.9873	9.81871	16.9023	6.1703
CYP2S1	6.31254	6.55116	1.09016	1.01864	0.871392	1.25028	1.33999	1.07887	0.869416	0.811398	0.819684	1.10565	0.896944	1.18491	1.19639	0.964652	1.05168	0.978008	0.909292	1.15833	0.89291	1.01453	1.02416	1.02511	61.565	1.24753	73.5024	71.5613	119.097	48.1144	6.77857	17.1854	4.26379	6.23716	68.4713	1.02443	100.509	68.0209	19.5876	25.2525	100.99	101.142	30.828	50.4087	66.7786	28.4693	20.5855	37.8406	181.568
TRPC4AP	8.35336	7.63417	1.06217	1.02262	1.03425	1.00216	1.0283	1.03385	1.01634	1.05042	1.04771	1.06446	1.1657	1.03572	1.01747	1.0027	0.906856	1.11093	1.05171	0.975787	1.03827	0.969467	0.762049	1.019	49.075	19.2357	67.1193	50.7787	52.9635	43.3352	128.028	41.523	63.779	56.8681	166.643	33.4679	60.0555	36.971	40.4222	49.5908	65.987	37.1787	433.606	39.8674	109.028	49.003	59.353	30.4841	70.1847
DNAJC8	9.67287	10.0707	1.02262	1.02159	1.08395	1.06797	0.987495	1.06701	0.997706	1.03018	0.889193	1.02088	0.825806	1.00027	1.03411	0.993828	0.928411	0.98467	1.08181	1.04362	1.02166	0.968208	0.932653	1.00017	48.5693	12.6696	74.3932	38.5061	29.0717	37.2172	81.3853	47.0964	74.671	72.2629	103.806	32.9985	59.7392	45.153	34.8097	47.4453	78.8545	45.6507	74.7748	38.4404	94.9414	53.9018	68.6186	45.0205	41.2953
ATXN2L	6.0679	6.0479	0.991669	0.993887	0.994907	1.02133	1.01921	0.98861	0.984636	0.873297	0.971494	0.925323	1.16608	1.0472	1.02637	1.00271	1.0503	1.02407	0.854722	0.941925	1.17655	1.04795	1.08396	1.00887	104.405	6.86401	87.7848	58.6231	88.7436	36.2521	82.1179	38.1865	55.2045	54.2127	131.944	16.6657	61.4815	31.6092	34.1944	37.1299	82.1693	56.8133	73.3031	32.2763	116.121	57.7492	74.0088	27.1825	180.251
PRKACA	5.83231	5.90867	1.00526	0.984511	1.02319	0.972058	0.933342	1.02854	0.983377	0.993435	1.03136	0.971445	1.14639	0.966226	0.891078	1.00879	0.898869	1.02022	1.02275	0.895068	0.982381	0.799111	0.819159	0.970313	123.353	14.3573	87.5245	44.999	57.6527	39.6113	72.9506	40.3235	63.0266	65.2546	78.0765	128.586	54.3687	36.6685	35.6939	42.3059	36.002	61.5878	54.757	59.3393	75.232	44.968	75.3593	27.9682	43.6607
TOMM40	8.49243	7.35561	0.96452	1.03212	0.972231	1.04894	1.06682	1.08202	1.02888	0.995706	1.0351	1.13528	0.734633	1.09057	1.06342	1.04794	0.997547	1.0603	1.00541	1.04288	1.00882	0.927765	0.804925	1.00694	52.2745	5.06406	54.6766	36.2043	55.0437	41.0308	77.4207	40.7705	82.8995	51.5436	68.7367	18.174	38.9154	30.0574	36.4239	33.771	60.3327	41.6071	71.7498	33.8211	58.606	80.9181	69.955	48.2947	101.376
C2orf79	7.07253	6.94738	1.01564	0.985398	0.985654	0.965919	1.02238	0.95467	1.02684	1.02821	1.00853	0.903905	1.05072	0.979529	0.974573	0.996505	0.93123	0.886745	0.913852	0.986462	0.965866	0.908623	0.782635	0.965423	93.8668	26.984	57.3171	52.4747	46.6751	56.7722	48.4327	56.9619	46.9852	72.1283	66.453	42.6309	55.2145	48.2331	41.7501	46.115	45.3793	48.1129	47.0081	36.4443	71.2287	51.6389	65.8797	53.3808	113.069
UBAP1	8.56136	8.3182	0.985712	0.962395	0.951649	1.05479	1.05977	0.943661	0.973786	1.03103	1.02622	0.927008	0.94705	1.0051	0.958859	1.03557	0.93471	0.960377	1.10001	0.999942	0.993983	0.922485	1.02506	0.990436	41.0361	10.0518	69.8884	50.6654	72.2232	57.73	74.1389	60.1995	78.3581	51.4919	81.0248	24.9745	62.4009	68.374	23.5471	27.7248	80.4976	66.2108	84.5908	49.888	29.4669	59.3079	75.6051	35.2935	68.6724
CNPY2	8.52185	7.3506	1.04439	1.08576	1.02101	1.06226	1.1276	1.02807	1.01008	1.04578	0.997829	1.06937	0.821951	0.998932	1.07441	0.96218	0.979609	0.983283	0.979093	1.07794	1.03849	0.703439	0.829837	0.997206	65.1568	35.6691	64.9087	58.5128	61.1932	34.6442	96.9472	40.7069	74.7159	58.8341	72.4033	31.422	68.1442	30.9736	35.652	44.624	87.2749	46.4096	64.2007	34.384	41.249	49.6664	77.2206	35.2504	76.2049
AMFR	7.51546	7.19714	0.980234	0.87141	0.969083	0.949093	0.959441	0.939236	1.00381	1.00258	1.03506	1.06296	1.07666	1.03609	0.992463	1.00788	1.01149	1.08088	1.03687	0.972556	0.943574	0.919875	0.868604	0.986659	63.2925	14.997	83.3669	47.2519	81.9815	49.1567	47.5087	56.3952	40.1379	52.1664	65.2483	40.0858	61.6493	68.5251	49.229	50.0367	61.2463	40.0391	42.9356	91.797	51.204	48.9461	75.1246	42.2304	72.0459
C1orf31	6.47694	6.25874	0.962962	1.04245	0.980765	1.1291	0.998516	0.974434	1.0084	1.27526	1.30689	1.00732	0.946121	1.03798	1.00677	1.01348	1.01605	1.07918	1.03428	0.974436	1.01465	1.12785	0.941468	1.04183	102.943	6.86692	56.9391	39.4082	120.459	26.7681	137.539	30.0454	71.6595	35.0726	53.8153	26.796	29.5504	30.1033	44.7304	25.1927	109.48	44.8485	35.0007	30.133	98.2862	50.7418	41.2287	26.617	207.33
CLINT1	8.84643	8.43309	0.948933	0.971991	0.96624	0.959595	1.11725	0.858	0.980219	0.951635	0.979231	0.97828	0.882817	0.968936	1.07545	1.01209	0.949506	1.09593	1.01548	1.09619	0.936222	0.995688	0.923976	0.983983	34.644	12.7978	48.1651	138.819	64.4277	80.5181	45.6443	65.6753	38.826	58.657	138.317	27.0258	40.2442	71.3225	61.3488	63.9145	20.1573	53.0603	28.5401	43.5072	29.2397	107.308	70.6898	33.6302	97.384
SCARB2	9.96348	7.56978	0.954551	0.98741	1.08974	0.985524	0.9445	1.03395	1.03139	1.05462	0.894494	0.942175	0.786035	0.984309	0.992992	1.02685	0.831609	0.997351	1.06959	1.03382	0.935138	1.02252	0.687271	0.965992	51.9573	45.2471	107.417	45.1559	46.1974	29.0564	52.7516	41.6183	78.1242	102.626	126.637	68.2928	83.6311	29.3851	31.0278	53.9012	36.5683	31.6832	55.5039	31.2126	62.911	50.6591	113.636	19.4708	51.7848
GNG12	6.54885	6.22043	0.997554	0.98558	0.946493	0.98206	1.12885	0.864048	1.13278	1.01168	0.912259	1.07471	0.847541	1.04363	1.12324	1.02098	0.938663	1.08508	1.00441	1.13082	0.996339	1.00932	0.788583	1.00117	49.4168	8.99128	93.337	45.058	52.0851	55.2572	47.6448	48.3014	63.9061	94.0024	120.88	18.3261	59.9439	73.4036	48.6435	61.7074	98.0119	50.5177	88.8096	48.0909	61.9424	91.1477	69.348	51.8105	26.4644
AP1S1	6.85194	6.81634	0.963998	0.999536	0.946073	1.0644	1.15091	0.995454	1.06799	0.789662	1.19596	1.04377	0.839844	1.08854	1.14503	1.04736	1.09365	1.24179	0.983709	1.12843	1.01465	1.4527	0.849123	1.0525	148.699	10.3096	50.657	36.4487	116.174	34.2377	74.7776	36.0024	104.934	61.1942	65.9666	11.8983	34.3646	28.0023	33.8813	34.5346	73.5755	33.4499	62.9331	30.5368	332.518	50.2198	61.9186	42.5572	59.6882
MRPS23	6.92873	7.14765	1.11371	1.0842	0.987121	1.04553	1.08981	1.04224	1.04252	1.01285	1.26911	0.890376	0.882058	1.03033	1.02798	1.05379	0.920251	0.872527	1.0313	1.10717	1.0642	0.765531	0.897825	1.01097	80.7904	12.1713	54.2427	45.6604	57.6138	34.2262	79.8134	31.7449	83.8446	54.7058	85.8333	33.0094	43.9521	37.1945	29.3255	41.6927	84.3661	35.3653	74.6955	35.3441	129.384	64.48	83.6614	38.6408	111.678
JAK1	7.33405	6.66568	1.15326	1.09896	1.0264	0.989875	1.00484	0.791496	0.989586	1.04418	0.949374	1.1175	0.989697	0.992974	1.03634	1.03719	0.991668	0.999015	1.08146	0.976113	1.00817	1.0519	0.926395	1.01221	52.8249	12.6818	125.155	60.4021	30.3603	36.5595	42.7764	44.5272	68.8913	84.2052	110.049	51.826	105.309	39.2017	41.2252	63.5959	69.781	64.9233	77.4735	46.6808	77.9849	44.8247	82.4143	27.1011	12.5576
MYBPC2	5.82163	6.68254	1.39829	0.912413	1.14111	0.668512	0.571366	1.10572	0.824447	0.940414	0.638337	0.941188	0.593552	0.748357	0.859705	1.08615	0.580268	1.16363	1.1501	0.785727	0.889121	0.978693	0.737094	0.891152	1.45675	0.00840011	22.9136	0.105725	1.38645	0.100312	0.042808	50.7508	0.0709176	0.543145	0.458171	642.099	1.44543	7.47779	0.472325	0.0912236	31.3654	101.309	89.478	194.757	0	0.0599427	157.711	15.4746	0.880634
YARS	8.76197	9.04922	0.994325	1.0239	0.977038	1.03066	1.13484	1.12291	1.04855	1.02762	0.966148	1.09949	0.990782	1.02966	1.02842	1.02108	1.00516	1.00711	0.978681	1.05105	1.03568	1.02251	0.892099	1.02322	82.3328	8.71489	71.3075	46.2503	43.7625	50.6523	58.9644	50.126	87.3579	41.1894	67.6259	19.4859	56.46	37.9246	46.2175	49.4692	80.0794	38.6951	82.678	44.9292	105.502	97.0357	54.6375	49.0279	91.1563
MGAT4B	6.50931	6.46599	1.06285	0.98073	0.985966	0.992353	1.11355	0.966436	1.0234	1.24938	1.07818	1.03834	1.11196	1.07825	1.06543	1.01759	1.08185	1.07407	0.916446	1.1213	1.04265	1.10333	0.934319	1.04945	45.9241	16.1442	60.9319	78.7602	120.627	50.4515	93.8478	42.6266	86.5228	53.8054	80.4938	18.4906	49.8426	32.7088	42.1288	49.1771	81.7847	35.7798	75.6196	34.5522	61.2572	69.2826	109.231	30.2004	60.1494
C9orf86	7.06983	7.22985	1.01262	0.973757	1.02914	1.00727	0.914616	1.06423	0.979282	0.984579	1.03258	0.946521	0.947445	0.993388	0.924633	1.03196	0.96709	1.0549	1.06079	0.915614	1.0145	0.985102	0.851149	0.985294	64.1869	16.4536	58.9674	63.1342	73.2458	45.0838	75.6255	45.4787	68.1861	58.678	78.1477	55.6599	47.9733	34.6129	46.3048	46.2699	96.1796	39.4865	68.0884	46.3488	57.6998	57.857	47.1333	33.1344	62.941
GPR87	6.09302	6.74941	0.974884	0.990476	0.86667	1.01982	1.32995	1.30403	1.00475	1.00606	0.980662	1.18178	0.640541	1.2804	1.31129	1.0772	0.991318	1.10205	1.07549	1.38936	1.00451	1.01682	0.904544	1.06917	63.3757	1.22057	54.0603	23.7096	28.2488	47.1299	54.5782	37.2991	68.3585	69.2569	74.4524	3.26997	50.2276	52.1212	37.1579	34.1745	72.8642	63.1562	58.6775	46.5986	77.8789	48.4273	148.145	47.6822	45.2601
TPP1	8.2173	8.70249	1.17258	1.08896	1.04566	1.05904	1.05168	1.01449	0.999173	1.05573	0.932541	0.999225	1.00354	0.986586	1.01572	0.998039	0.948008	0.936225	1.06138	1.02627	1.01265	1.06622	1.10135	1.02738	79.8387	12.649	136.546	41.9601	71.1195	36.0173	73.2522	52.4984	141.627	82.1132	87.3916	37.2228	127.155	27.8912	39.0609	40.6544	82.4361	45.1845	87.0525	33.19	125.099	59.3967	78.1235	22.5397	41.8225
LOC388955	6.02314	6.22446	0.973284	0.995435	0.999169	0.984344	1.03322	1.03853	1.03167	1.02126	1.11619	1.11473	1.34771	1.02599	1.1042	1.03808	1.0077	1.04152	1.05313	1.07335	1.00602	1.0425	0.955933	1.04781	42.4051	17.7265	52.6909	41.3221	64.8091	66.3138	79.498	39.8867	83.6684	67.7943	78.4908	15.2945	66.2206	51.4243	50.2097	79.5364	31.342	47.8076	48.9987	52.8406	38.7412	68.1609	48.1381	67.7086	43.0473
DHRS1	8.78265	8.99759	0.919358	0.846878	0.830277	0.78315	1.10012	1.08984	1.03339	0.980996	0.980608	1.06779	1.13769	1.01166	1.05016	0.988828	1.0471	0.970818	0.896277	1.10026	0.906868	1.06451	1.15102	0.997981	27.4193	8.26207	40.0474	28.9049	33.6333	118.976	28.8205	87.3262	75.346	54.1541	37.3214	8.1505	60.8113	142.158	74.4253	52.5557	57.7661	42.8341	31.4119	134.482	74.5895	63.6709	21.351	108.888	14.0138
HNRPDL	8.04137	7.39811	0.927601	0.948388	0.967266	0.993548	0.87169	0.960817	0.911253	0.949334	1.00897	0.898403	1.06263	0.948184	0.964378	0.967625	0.998096	0.9658	0.929045	0.978324	0.908024	0.981544	0.760432	0.947684	58.7973	18.8047	75.8687	42.1619	55.2175	25.5145	105.673	76.1414	58.7809	85.1262	138.422	34.4491	37.4535	43.2863	20.2659	40.2946	67.343	30.6333	75.8066	33.2848	59.4893	45.4327	71.8435	37.1963	53.0916
MRPL55	7.13304	7.20399	1.03038	1.02381	1.00925	1.02652	0.984129	1.05955	1.00032	0.986937	1.12201	1.00893	1.21296	1.02532	0.970446	0.993734	1.06099	1.02177	0.94951	0.918938	1.03891	1.06947	0.870671	1.01831	76.5065	20.8295	58.0824	52.6197	109.008	38.1347	253.737	49.5199	49.5561	50.4694	64.0832	38.1815	41.1568	27.5204	23.6541	31.1798	85.9911	33.1314	46.6887	35.7785	89.8122	45.6047	55.1928	44.3506	101.711
MMP13	5.44116	6.0448	1.30578	1.09174	1.00869	1.42226	1.31546	1.11511	1.58557	1.60365	1.04907	1.51854	0.949438	1.44769	1.7	0.96846	1.13956	1.4346	1.37658	1.57804	1.53736	1.20449	1.09854	1.30717	34.0384	0.0151227	454.001	0.352935	32.0231	0.0677728	1.66983	0.0588951	41.13	0.174696	9.42067	0.0133226	284.915	0.064519	2.01342	11.2077	4.64027	0.13696	13.7405	0.083511	171.251	0.12141	6.91638	0.00858979	0.416416
C19orf62	8.01842	7.68954	1.02861	0.993202	1.02047	0.990533	0.94606	1.02706	1.00609	0.954187	1.00672	0.963423	0.788051	0.990308	0.99357	0.996624	1.04301	1.07698	0.912819	1.01406	1.00398	1.07248	0.971772	0.990477	70.9131	18.6865	71.2579	50.2117	79.7905	41.5884	80.4764	49.1711	53.5808	60.7476	81.1065	53.2476	52.4196	35.2552	37.9775	43.0467	63.2081	46.2612	48.1616	39.1495	68.3818	42.1653	73.8069	27.834	54.0047
LIMK2	6.14819	6.41135	1.04109	1.06077	0.971502	1.10311	1.10728	1.06744	1.02474	0.910484	1.06266	1.1328	1.31033	1.13033	1.16837	1.04849	1.07099	1.12956	0.993669	1.13709	1.06181	0.9429	0.935131	1.06717	61.5468	9.0115	75.444	61.1903	60.4809	46.6413	54.4004	55.5008	68.8419	78.2216	72.4233	11.7376	92.9644	41.112	67.2361	70.6633	84.0853	57.7426	73.1981	34.0617	76.1729	60.2777	69.1654	33.9938	9.00233
CDA	6.4679	6.6342	1.2779	0.898058	0.796497	0.749099	1.1337	1.21342	1.30291	0.987582	0.954195	1.21337	1.0461	1.22954	1.15129	1.15675	0.985699	1.1261	1.09738	1.43824	0.981522	0.976601	1.36029	1.09887	56.0451	0.0995181	169.143	3.7987	20.14	123.982	15.2965	99.891	37.9505	15.2895	4.00646	1.93233	143.292	99.5348	120.365	118.794	36.715	4.04154	14.6439	85.3794	122.122	47.4426	88.7257	204.857	56.702
HBEGF	8.27862	7.32579	0.961523	1.03727	1.06702	1.04758	1.25307	1.01879	0.934297	0.959509	0.881319	0.974741	1.00128	1.16035	0.900946	0.847281	1.08374	0.922796	0.899515	1.07707	1.154	0.655456	0.868033	0.98598	138.776	1.27653	35.6299	31.2009	37.8633	49.0612	70.0507	261.422	53.247	127.13	72.1894	5.82928	16.7293	33.8793	19.5514	17.0259	11.2578	118.876	27.3119	7.63117	116.506	25.2313	140.907	221.595	70.8804
EIF5B	8.0052	8.32726	1.00829	1.05482	1.00537	1.01663	0.964244	1.01534	1.02482	1.02631	1.01945	1.01181	0.867966	0.990162	0.989636	1.00092	0.957939	0.883494	0.966747	0.98356	0.962707	0.955861	0.737481	0.973502	55.7532	15.3825	54.6101	42.3121	50.6791	33.1458	43.8227	34.9549	85.4727	65.8161	84.7881	36.1732	34.4486	41.1486	34.6347	54.6818	102.456	54.9877	54.6459	52.1876	222.626	80.9987	58.2618	32.1719	85.0128
HSPB7	6.15988	6.16735	1.2128	0.826937	1.12062	0.741138	0.571539	1.06214	0.809891	0.927799	0.574738	0.880819	0.605372	0.72775	0.715923	1.19517	0.920251	0.740377	1.17809	0.707916	0.866273	0.63803	0.688189	0.843418	3.1874	1.00751	57.1039	0.721759	3.59022	0.56189	0.175517	49.7304	0.0652504	1.69406	0.852385	407.334	2.39168	9.39163	0.107809	3.25298	29.4444	54.411	70.166	141.232	0.507573	0.585187	185.349	20.5488	0.955521
FAM46B	6.50888	6.44085	0.75323	0.736512	0.717096	0.761015	1.19429	1.09237	1.03684	0.715854	1.0177	1.08486	0.785154	1.13301	0.94677	0.979298	0.824204	0.961089	0.871846	1.10211	0.816015	0.678264	0.991129	0.914221	6.86975	19.5438	15.0611	13.2155	13.6181	96.6438	14.8122	178.197	14.4615	68.1197	9.34833	4.66184	99.7498	141.419	215.018	104.512	92.0006	91.6056	42.3338	130.706	9.769	47.922	24.5067	74.9829	4.0751
BUB3	8.64585	9.03696	1.0057	1.05343	0.968703	1.01955	1.08522	1.0416	1.03388	1.02664	0.988693	1.00199	0.91862	1.02993	1.03572	0.998728	0.943574	0.984552	1.05205	1.07285	1.01175	1.01371	0.991785	1.01327	70.6048	8.5818	69.8289	31.7474	51.5327	38.4741	85.1495	40.1657	106.144	59.283	119.42	16.8629	60.5401	41.9974	34.0195	48.6226	85.7313	40.8163	101.382	40.8704	60.1923	61.8543	55.9533	33.5361	54.3553
PDLIM5	6.42099	6.23257	1.07885	0.802202	1.01842	0.774412	0.656752	0.927698	0.930162	0.919432	0.921347	0.908088	0.939763	0.945273	0.843688	1.00748	1.01428	1.06288	0.922872	0.901089	0.939073	0.981849	0.829773	0.920256	27.2441	13.5426	74.7411	33.0948	20.1613	34.3163	17.9331	39.6886	30.174	24.8835	75.32	138.216	33.6081	72.9692	29.3884	49.6973	47.3316	64.4245	93.2587	85.3671	44.5761	73.7997	83.256	24.3657	22.7722
SLC35A4	7.88387	7.46607	0.974243	0.965006	1.0006	0.867714	0.949146	1.03865	1.00445	0.992454	1.01867	1.02213	0.951655	1.02412	0.978994	0.993252	0.977881	0.984489	1.09902	0.968115	0.962772	0.938662	0.94774	0.983799	65.7998	18.9986	64.9626	62.8446	71.4346	64.5133	97.0138	52.9721	78.2666	78.6276	86.5305	59.665	61.2267	47.6871	54.0836	57.4718	33.111	69.0627	46.3392	58.2574	39.0387	75.0245	60.5966	44.1253	36.0399
PHLDA2	6.14191	6.19307	1.00833	1.03378	0.966038	1.03726	1.19454	1.08373	1.09331	1.12568	1.12481	1.25424	1.65018	1.06683	1.08703	0.980635	1.13067	0.819769	1.00549	1.24435	1.01003	0.853168	0.940862	1.08146	45.1013	1.39851	30.6956	38.0842	110.789	29.4983	49.7717	82.8473	166.284	44.0503	77.5902	1.79746	40.6422	47.093	55.1427	41.0572	40.2687	141.215	99.2299	11.523	169.736	28.741	159.269	82.959	30.2791
PTP4A1	6.8588	7.08808	1.16298	1.02696	1.09617	0.996765	0.896148	1.01748	1.03343	1.07609	1.10331	1.01953	1.12093	1.00917	1.04384	1.00002	0.926433	1.04263	0.99314	1.05378	1.04016	0.979285	0.897781	1.02552	46.8097	10.0792	56.0024	42.818	53.3685	40.3394	215.869	47.3403	54.8405	80.2852	86.4217	34.9653	34.5593	37.3703	29.1831	39.9236	64.5912	59.8198	107.668	27.0946	60.8052	65.8065	132.792	60.781	85.5139
PARL	8.62213	8.9319	0.96174	1.01973	0.994448	1.08423	1.00637	1.09539	0.980071	0.995738	1.03376	0.996173	0.95634	0.987812	0.97761	1.01786	1.00674	0.985922	0.992363	0.992345	1.00021	1.00093	1.03429	1.00572	106.703	18.6511	89.6577	34.3482	49.8693	23.2569	69.3687	38.0229	49.6519	54.4609	69.8049	29.2215	35.5461	24.7877	23.4312	32.64	38.5877	27.3433	40.9131	23.0516	55.3456	32.2404	82.0801	28.5252	105.449
OCIAD1	10.6168	9.96824	1.00614	0.957496	1.03236	0.970216	0.995077	1.02833	0.908537	0.995481	0.945107	1.00893	0.948764	0.984904	0.954539	0.985443	0.991928	0.986705	1.00773	0.976904	0.99853	1.01314	1.04501	0.98768	38.2264	29.2087	49.5448	52.4332	27.2934	38.0082	55.7291	43.6411	83.5595	91.2754	98.1209	67.8684	52.7464	43.2371	38.3322	51.0741	58.234	44.4212	56.1102	45.1094	77.5353	51.5273	82.4793	33.1905	46.5436
GYG1	8.36238	8.85414	1.05919	0.925875	1.03692	0.948347	0.801175	0.943669	0.958593	1.30857	1.10102	0.984591	1.14976	0.889955	0.842131	1.00982	0.991482	0.948443	1.04032	0.929875	0.968984	0.958196	0.897832	0.985465	36.2845	14.2151	45.7525	34.835	54.5641	24.8036	41.1936	40	56.4659	48.726	50.6006	179.514	41.5993	23.6424	25.5666	36.4986	29.2102	49.6412	55.5554	81.6455	79.6833	30.1373	72.9645	26.4002	85.2507
ST13	9.03732	9.0362	0.957383	0.973866	1.04818	0.983037	0.893362	1.06149	1.00002	1.01163	0.956023	0.937147	0.890349	1.00244	0.995825	1.00841	0.928483	0.925827	0.940465	0.996593	0.988285	0.991165	0.994315	0.975443	67.2985	20.7729	72.4918	65.9743	118.903	37.7552	59.0922	36.3402	73.623	84.3431	91.4132	54.9388	47.0931	45.7051	37.2999	52.6007	65.6146	46.0006	51.9483	43.2289	73.9053	53.1588	70.1654	33.1619	71.5071
DHCR7	6.12259	6.05636	1.05677	1.08316	0.93231	0.992842	1.12228	1.07179	1.01309	0.944192	1.23379	1.01167	0.829007	1.08168	1.1819	0.926074	0.971178	1.04935	1.0849	0.941567	0.984494	0.828338	0.92514	1.01264	284.754	6.8645	74.0585	17.965	33.7354	31.5974	93.4324	26.429	1.29129	157.402	20.4149	12.9884	31.4291	38.9902	49.7626	68.9167	66.6243	18.6763	1.98311	47.2099	167.831	39.8368	103.909	24.0474	203.98
CNOT1	8.03908	8.03055	0.957348	0.965604	0.957274	0.984442	1.07141	1.00104	0.954146	0.98651	0.980999	1.05738	0.96729	0.993551	1.04057	0.998464	1.03023	1.07574	1.00924	1.04223	0.947567	1.03747	0.890394	0.997566	59.4838	13.1826	54.5929	58.6988	58.2037	70.2813	59.8191	58.2799	48.1447	52.1217	119.813	20.0721	58.8977	68.2361	58.3561	62.4433	58.7338	54.0392	66.9005	47.9361	62.508	78.4599	58.9986	33.5521	72.097
THAP4	5.77662	5.8535	1.05779	0.986599	0.993964	1.03452	1.0163	0.983526	1.02521	1.48047	1.14208	0.99022	0.825102	1.03585	0.994253	1.03907	1.12933	0.838847	0.85501	1.06182	1.02547	1.21983	1.10952	1.04023	22.6421	16.5774	54.4701	56.8515	80.8566	55.1313	109.665	48.6326	56.0013	72.2065	100.952	59.9141	36.8445	45.2424	30.1338	30.8797	72.9928	56.3975	53.5589	44.061	61.1445	67.0075	57.1522	38.4037	127.226
MOBKL1B	6.80251	7.73211	1.04596	1.11665	0.961429	1.09724	1.24153	0.934416	1.04425	1.00558	1.15913	0.975124	0.972051	1.11427	1.21255	1.05629	0.941194	1.05292	1.09146	1.21362	0.99547	1.0187	1.05995	1.06237	82.9891	6.72593	73.5957	53.664	62.8514	44.3165	56.1881	40.7879	76.7807	63.3221	155.971	16.3225	71.2263	53.3952	46.7493	58.1527	61.026	45.4003	92.9259	28.4517	68.94	74.6526	76.1992	30.251	90.6855
MBD2	6.02851	6.03029	0.973275	0.991404	0.948834	1.0154	1.04536	0.939588	0.991944	0.909425	1.0587	0.905751	1.10188	1.01322	1.04882	1.0186	1.03082	1.00811	0.866497	0.986818	0.977352	1.04198	0.984503	0.993251	41.1972	16.4077	64.2785	47.4485	46.1211	52.4383	56.5544	59.7438	79.0456	57.8355	113.271	14.9396	65.0958	59.826	51.3844	60.0274	91.4795	46.1257	75.3812	51.9057	33.1646	79.4112	38.0364	39.1793	54.5841
KLHDC3	9.27818	8.72766	1.00343	0.969965	1.01721	0.922108	0.894016	0.990265	0.988908	1.02501	0.974248	1.01207	0.792981	0.968582	0.897058	1.05122	0.929451	0.88905	1.0278	0.900964	0.965437	0.98785	0.902925	0.957646	71.9979	23.6475	70.6645	55.5539	59.1956	37.8522	67.6157	46.4069	48.8798	78.2619	85.4652	77.8584	56.3139	36.7623	35.1253	42.4555	77.0967	44.6918	97.5441	45.0507	33.036	41.1023	53.0946	34.1621	45.0023
SIK1	6.93688	7.17676	0.891837	1.06404	1.03466	0.944076	1.17535	0.954277	0.986721	1.233	0.906832	1.01481	0.867352	1.10266	1.01643	0.940456	1.02681	1.10873	0.803979	1.09608	1.06212	0.782835	0.734135	0.987961	46.1635	3.95829	58.3297	94.5239	101.477	21.8302	276.846	186.891	30.8089	180.513	134.613	10.5236	62.3719	20.2408	14.744	18.2957	23.006	12.1403	74.3376	16.1997	38.8735	14.1226	135.986	148.7	23.4853
DYNLL2	7.19706	7.18013	0.959485	0.983001	1.03156	1.05761	0.966346	1.10015	0.984896	0.982953	0.986173	0.93258	0.909072	0.967669	0.937924	1.00246	1.03653	1.0207	0.916191	1.00025	0.983309	1.01932	1.07497	0.993007	63.7231	31.5845	51.2845	73.2664	83.3599	30.9721	60.4139	46.1251	32.7727	65.232	78.3171	84.0593	56.9873	40.2086	47.2443	56.7729	72.236	49.9298	60.302	65.8506	79.3565	59.5157	64.9232	24.8679	98.832
B4GALT2	6.14064	6.27467	0.941533	0.972132	0.964865	0.889686	1.02707	1.05378	1.07457	1.27398	1.17036	1.15313	0.85035	1.11714	1.1382	1.03374	1.10312	0.943466	0.973998	1.0723	1.09021	1.52508	1.10949	1.07039	67.1147	11.3096	66.1021	42.5275	42.5759	31.4149	68.1436	28.6459	84.1413	50.8868	57.3781	23.667	56.9769	24.6976	24.5293	34.28	93.7687	32.46	99.8539	28.7318	172.611	63.2693	75.7281	33.83	35.5356
FAM89B	8.65159	8.52787	1.08428	0.995403	1.05238	1.00715	0.891678	1.03009	1.0178	1.02521	1.07611	1.06191	0.952595	1.03133	0.980661	1.02701	0.946644	0.942624	1.04865	0.940542	1.05719	0.818776	0.766533	0.988312	91.9248	24.226	91.397	41.175	98.6217	34.6749	50.4374	37.4274	55.811	55.0652	76.0496	52.6484	72.4464	30.363	36.1952	34.6328	70.0966	45.6219	79.8903	57.9435	117.278	35.4528	67.109	42.6509	37.4059
SSSCA1	6.25256	6.4205	0.978936	1.06639	0.983486	0.986605	0.991697	0.990267	1.0862	1.52839	1.10739	1.13827	1.2655	1.06324	1.03533	1.017	1.06596	1.12563	1.03071	1.01331	1.03594	0.957374	0.834139	1.06199	91.4583	15.1133	74.4426	54.2189	70.3063	32.3145	62.6617	40.423	52.3529	49.6781	68.0572	31.1495	42.4991	25.5688	28.2814	39.6625	103.596	31.6202	80.3072	30.8484	143.035	47.261	72.6887	52.8524	57.5501
CA3	5.89867	5.54618	0.924836	0.833438	1.35023	0.686597	0.550189	0.99663	0.87336	0.862543	0.574113	0.900661	0.54016	0.763074	0.805135	1.11477	0.819371	1.00031	0.913647	0.7231	0.776404	0.817079	0.704659	0.834777	0.156293	0.587122	9.06608	0.925231	3.24299	0.279365	0.308638	36.8679	0.0932594	1.00047	1.26969	73.8216	0.840185	13.0842	0.0151079	11.2785	3.86711	92.1235	17.3196	63.6919	0.317306	0.305787	24.2622	20.1699	0.810767
ATF6B	6.53675	6.43803	0.967036	1.00785	0.990244	0.944008	1.09019	0.982434	1.00428	0.621372	0.998273	1.01896	1.23853	1.05704	1.07633	1.02714	1.06651	1.05076	0.908094	1.00028	1.02306	1.14995	1.11773	1.01619	82.3557	9.53491	93.348	56.4836	63.333	46.0846	80.6452	51.9184	55.0003	84.2863	90.9332	19.8746	66.8238	44.4874	44.6472	46.1003	105.018	43.1901	90.0033	39.2108	40.2094	53.2945	85.1443	34.51	33.9915
C11orf2	8.90235	8.14623	0.963373	0.980727	0.993409	0.930136	0.923419	1.03991	1.00073	0.977471	0.887111	1.05427	0.853931	0.974646	0.973029	0.935226	0.998116	0.970411	0.959545	0.933118	0.892006	0.973278	0.663573	0.946544	92.5208	46.6875	66.1421	75.5144	79.4879	50.2691	38.7614	62.3122	35.5542	80.2139	59.0183	52.8812	51.8648	39.1979	39.4594	45.2875	51.974	45.8904	68.4673	42.6379	113.125	52.0507	67.0772	39.4765	70.7621
UBD	6.40822	6.40934	1.22337	1.51183	0.959716	1.09881	1.25117	0.724439	0.980748	1.05606	0.982645	1.1359	0.765222	0.817066	1.06346	1.14969	1.11059	0.954148	1.0921	1.19047	1.10126	1.58234	1.00422	1.08358	8.54342	2.29279	39.9649	149.081	8.62123	11.4413	45.5465	11.4133	92.6208	7.12879	802.552	10.4675	301.817	28.2835	37.0823	51.6635	1.09822	18.0347	121.833	114.337	0.496159	6.99076	155.831	2.70107	1.47293
NOB1	6.92338	6.90274	0.959571	0.993405	0.955991	1.06391	1.01105	1.03908	0.992363	0.996126	1.14029	0.859135	1.03844	1.03113	1.10134	1.01809	0.769668	0.988353	0.998288	1.13431	1.05528	1.06206	1.00043	1.00992	60.6629	12.9147	86.3901	49.3504	74.1995	46.2133	68.5194	37.6308	85.3054	61.3514	83.8204	23.4929	43.7492	42.3918	32.1802	40.8858	58.2276	49.1042	64.187	39.5854	110.404	65.8928	64.3021	37.4098	93.5346
CHD4	8.72485	7.44326	0.997574	1.0368	1.02299	1.02099	1.02473	1.0212	0.991535	1.00558	1.00634	1.11161	1.12959	1.1262	1.01839	1.00028	1.0294	1.1026	1.01996	1.03507	1.01863	0.750944	0.966759	1.02082	66.0443	10.4552	77.1057	83.8598	68.6067	40.6197	52.4697	43.597	47.1607	65.2986	106.716	29.4526	63.371	34.0573	38.6427	48.8672	96.8167	33.7524	94.3246	41.1311	81.7929	68.0584	91.5559	27.1153	57.6155
PRSS22	5.511	6.04712	0.964215	0.980103	0.938504	1.00277	1.22746	0.973203	1.11028	1.17935	0.600664	1.07911	1.54808	1.01061	1.01986	1.01276	1.28811	0.926074	1.25013	1.39998	0.965058	0.7757	0.959217	1.05768	152.453	3.71079	11.3813	93.7426	13.8304	150.413	44.0625	30.2187	14.9731	18.0011	58.3522	2.90212	53.3702	94.4178	97.0114	78.8426	11.5468	141.439	46.205	10.4851	197.524	65.0583	76.4986	20.8987	4.02739
C3orf1	6.39203	6.33165	1.00326	0.96931	1.00718	0.947015	0.935475	1.04099	1.0265	1.01435	1.0566	1.03981	0.862137	0.935974	0.910521	1.02799	0.978812	0.953701	0.93293	0.92096	1.00167	1.02849	0.927664	0.977207	60.5802	12.6919	55.0369	45.644	76.1867	35.8541	111.454	40.22	85.6515	55.4106	104.153	50.5229	52.6486	37.9175	45.7811	50.785	72.1345	42.1035	60.0568	45.4328	82.9832	45.97	79.3955	40.8101	95.0382
HLA-DMA	6.25287	6.54567	1.09313	1.1416	1.10609	1.06374	1.11536	0.889088	1.00332	1.1475	0.706928	1.09507	0.959648	0.986733	1.04692	1.01522	0.831225	1.31316	0.958638	0.924619	1.00053	1.18391	0.960091	1.02583	62.648	29.0785	108.555	166.434	21.6915	29.5473	122.248	62.226	193.002	75.5603	155.19	27.0782	222.248	28.8144	61.8298	82.4296	3.63811	85.3116	109.79	57.9353	14.4242	25.328	181.447	18.0328	8.1406
PCNP	9.82301	8.73794	1.00366	0.970876	0.990349	0.967611	0.900574	0.854583	1.0135	1.00081	0.995468	0.927635	0.745647	0.995889	1.00912	1.01269	0.927602	0.975989	1.11324	1.05999	1.00839	0.988946	1.01013	0.97489	59.2655	19.0863	82.9206	37.3025	87.9908	34.3035	86.4642	36.8752	70.4989	81.468	133.545	41.4443	49.2039	57.0151	37.2668	55.4135	110.754	40.5465	73.7721	48.1433	54.0018	56.5545	90.1865	33.2062	44.019
BCL7C	7.13554	6.98231	0.971047	0.967436	1.0061	1.01532	0.988023	0.948727	0.966574	0.950821	1.10466	0.88557	0.876202	1.06773	0.999707	1.0137	0.953883	1.01875	0.920933	1.00281	1.15401	0.813164	0.874171	0.976159	84.9026	12.3295	73.8474	36.5355	61.4481	31.8345	122.068	48.0258	51.9192	48.6428	68.0896	29.701	47.7903	30.7444	24.1646	35.365	117.661	32.1904	52.8839	26.4749	76.3162	46.6008	60.4211	30.7585	64.6446
PTP4A3	6.45831	6.58976	1.21378	0.964213	1.12853	0.929061	0.754544	0.996065	1.0344	0.801878	0.948105	0.912404	1.26235	0.846495	0.841186	1.01663	1.13167	1.06313	1.07488	0.786115	1.05435	0.989387	0.748746	0.976092	46.9638	6.57788	102.159	13.7737	64.249	4.6817	33.775	37.5179	7.65383	22.6106	50.1689	191.6	23.315	7.53197	2.12527	9.80766	16.7838	31.4822	71.0287	89.0581	24.3571	2.6392	94.5969	10.7341	34.576
SMARCA4	5.93974	6.21572	0.987088	0.958665	0.955774	0.998806	1.06783	0.986564	1.00391	0.964146	0.982994	1.3405	1.04073	1.05491	1.06325	0.993906	1.34767	1.29261	0.764946	1.03114	0.97606	1.016	0.825913	1.03111	127.229	9.9582	63.319	69.6061	49.7506	63.8016	75.6966	57.2856	69.1791	59.2066	117.764	23.4248	47.8693	40.1857	56.2489	47.0115	53.7583	45.62	68.2446	43.1853	97.7942	85.8594	79.4644	27.2226	95.5098
PSMD1	8.55727	8.83421	0.97925	0.986972	1.0129	0.949592	0.935935	1.03455	1.02517	0.926065	0.942382	0.958561	0.864017	1.0126	0.990579	1.02796	0.969173	1.00492	0.967981	1.0245	1.01157	1.0021	1.03267	0.983784	50.2418	5.60546	59.2262	38.9794	64.7014	50.9212	73.5945	44.7408	66.9296	60.4952	92.9547	51.6144	55.9394	49.2627	50.9338	47.3855	85.1514	45.0525	67.2303	54.7798	79.1981	64.6318	82.8255	39.9005	47.3713
DKK3	8.0699	8.04396	1.00338	1.09364	0.964041	1.09173	0.900969	1.20278	1.05079	0.977643	1.0648	0.961091	0.767982	1.10687	1.0724	1.00448	0.909224	0.95822	1.06768	1.09657	0.986567	0.983653	0.917614	1.00867	43.8373	12.2558	129.998	13.4581	67.1218	23.0744	20.6176	32.6627	62.4693	45.2677	52.0618	24.8231	138.319	25.2206	9.87335	36.0737	27.5429	7.11234	241.684	29.3862	111.893	36.2742	21.7378	21.198	68.4096
AARS	9.30261	9.99638	1.02576	1.06363	1.04982	1.11139	0.980135	1.02183	1.02705	1.02433	0.911568	1.0484	0.81882	0.978793	1.03627	0.980877	1.03974	1.00548	1.08428	0.977368	1.01885	1.03715	0.845605	1.00415	94.8537	19.1448	93.655	59.8356	85.9299	32.5685	75.3069	36.8916	37.207	43.3868	93.871	37.6559	59.2323	25.182	39.8676	41.8733	82.1148	24.2997	95.5344	31.99	131.813	69.7318	76.8048	26.3576	112.769
SEC62	7.04851	6.83154	1.08248	0.975027	1.07008	1.00551	0.933929	0.888804	0.969217	0.892048	1.0611	0.908174	0.924181	0.920919	0.953501	0.949863	0.884621	0.935929	0.940102	1.01758	1.03967	0.920157	0.875693	0.959457	62.4293	56.7922	86.4309	52.315	73.8396	26.6015	45.9546	26.1127	54.779	71.3912	99.8341	48.9117	46.2478	31.1176	21.503	59.9577	79.9125	28.4887	61.2311	27.2186	65.5405	41.7248	111.608	19.6592	71.3494
LDB3	5.74296	5.81594	0.9997	0.843411	1.09682	0.794828	0.653259	1.02481	0.947915	0.712995	0.732594	0.781395	0.937621	0.919257	0.793036	1.0199	0.98106	1.00954	0.956911	0.728192	0.957595	0.634799	0.823347	0.873761	0.289845	0.154986	6.10522	0.818303	1.13215	0.100667	0.175667	14.3277	0.0553087	1.04698	0.390342	503.768	0.632863	9.53345	0.119156	3.56044	12.443	110.601	27.229	121.664	0.106381	0.18898	36.4791	12.5724	0.26728
GOT1	8.49468	8.42867	1.01572	0.879919	1.00842	0.773791	0.759573	0.963708	0.942427	0.992856	0.923183	1.03455	0.838536	0.848597	0.818873	1.00036	1.00366	0.942291	0.950632	0.849076	0.887933	0.98125	0.908823	0.920199	48.0879	17.2616	30.2232	47.8278	44.6377	50.2021	51.6888	40.7213	44.8386	48.213	63.9342	269.679	23.9951	52.0274	29.6637	31.5768	57.1183	82.9665	30.5142	63.4073	32.8662	50.414	38.7383	31.6165	79.5269
DDX56	7.94965	8.14501	0.951524	1.05579	0.995774	1.00453	1.06942	1.10678	1.0434	1.0452	1.01632	1.11178	0.948845	0.999952	1.02603	1.00669	1.08105	1.0371	1.02266	1.02765	1.04743	1.22223	1.11002	1.04429	55.6698	7.91558	47.4342	44.627	57.5514	42.0177	118.75	34.8032	77.5657	50.587	76.1813	24.894	46.0375	37.7353	39.5391	41.7083	64.521	45.2821	56.6023	41.2186	101.328	64.8996	77.6635	47.9354	110.161
TBCB	9.16437	9.13559	0.985485	1.01026	1.04583	1.0314	0.948405	1.05902	1.03732	0.949431	1.01444	1.00032	1.07387	1.03564	0.999216	0.995249	1.02492	0.948271	0.963686	0.975733	1.01067	1.01979	0.917597	1.00222	53.9614	8.15815	83.3944	49.8085	96.8185	35.5955	72.7215	50.7519	67.6366	44.9625	82.0052	29.0272	94.4963	34.2989	30.9728	35.3919	65.8423	37.0394	91.6216	46.5017	65.612	47.4583	66.5574	37.0643	75.4759
ILVBL	8.08273	8.02242	0.907647	0.928637	0.953643	1.00045	1.07278	0.994184	0.978842	0.857956	0.982919	0.997431	0.885917	1.04919	0.981503	0.987	1.05716	0.920562	0.93706	0.921579	0.971251	1.05767	0.730928	0.960682	190.285	18.4464	41.8585	62.3391	49.9861	75.4524	122.877	62.6661	35.9692	59.3148	57.3552	29.069	41.3486	61.3955	52.5806	50.8316	47.078	47.6627	43.5879	43.1414	72.828	50.8637	89.0041	88.8293	65.7861
ARL8B	9.11588	8.87806	0.94883	0.971576	0.938541	0.966532	1.00313	0.956787	0.92984	1.03147	1.09135	0.919818	0.978349	1.00365	1.00866	1.03473	0.942734	0.924948	1.08919	1.10478	1.01762	0.997454	1.03903	0.995191	49.7108	8.68489	61.7346	37.924	70.6062	58.1433	53.5924	50.0876	79.4193	74.3416	129.105	33.0386	82.6004	72.6303	55.4188	65.338	58.2381	60.8328	53.6431	58.7057	58.5327	84.2828	58.914	45.2085	80.1366
DGUOK	8.22677	8.34208	1.01015	1.06464	1.00972	1.09042	1.05298	1.04428	1.04506	1.02457	0.976727	1.01093	1.00953	1.03819	1.07266	0.981587	0.9946	0.99934	1.02525	1.02608	1.00408	1.02464	0.889571	1.01881	105.239	11.9903	73.4859	54.4905	81.6052	29.4653	58.2076	32.493	79.612	58.694	80.5691	19.055	47.7828	30.4657	30.5231	45.5111	73.7267	31.7545	59.5629	30.4006	118.711	40.4041	77.6511	30.9662	96.1627
PTGDS	8.1807	6.37843	0.840619	0.992941	1.17821	0.977826	0.766628	0.7107	0.809454	0.942377	0.6235	0.872198	0.849261	0.883429	0.875791	0.79715	1.02711	0.973257	0.813133	0.903921	0.912103	0.909049	0.831891	0.880502	41.8313	18.274	166.036	20.3753	11.7894	36.4541	5.12832	76.4827	5.34124	672.029	140.363	172.849	110.266	33.8316	13.0444	78.4808	20.6252	17.4113	20.8108	18.1698	2.1599	109.63	33.5853	23.107	1.90903
ITGA5	7.00406	7.87628	1.38662	1.21341	1.22996	1.3974	1.10632	1.32615	1.14739	1.11446	0.870933	1.19494	1.08359	1.19027	1.11908	0.988383	1.06942	1.04447	1.22863	1.0979	1.08833	0.963313	0.643735	1.11927	91.2959	1.2181	321.365	5.28912	93.5538	7.94903	50.6089	20.8862	34.746	33.4579	56.2268	15.4912	104.628	4.0791	3.2981	12.7245	74.8253	6.93984	223.602	7.28517	60.5053	8.3733	286.654	4.88599	64.8731
TCF25	9.27494	8.76525	0.97403	0.976702	1.02437	0.922138	1.00441	1.06775	0.973508	1.02016	0.949045	1.07648	1.08059	0.978224	0.969734	0.963039	1.00699	0.986074	0.96943	0.988743	0.966547	1.06209	0.830933	0.990047	71.0502	21.2187	87.4961	81.0043	79.4111	50.6665	61.7775	51.4884	55.5603	83.7107	92.6349	43.2218	67.9589	44.9964	47.9256	51.8559	32.1114	39.0555	61.5894	46.0685	76.9009	53.2777	81.4526	44.408	57.4535
MINK1	6.23973	6.42701	0.970028	1.00786	0.995517	1.01911	1.04397	1.12532	1.00132	1.00875	1.0215	1.0573	1.16572	1.10405	1.0696	1.01908	1.14063	1.08162	0.960074	1.07912	1.00269	1.14035	0.934008	1.04513	60.4241	6.6114	56.1093	52.2623	76.7358	79.2682	70.5518	56.8458	53.4084	58.6235	87.4549	11.3454	79.9674	68.9368	61.4465	69.8975	114.802	69.6545	99.7779	52.7561	70.416	94.6876	30.3723	52.5899	48.4837
LMO7	6.00551	6.05516	1.08311	0.965961	1.04243	0.880425	0.896576	1.00827	0.982791	1.31433	0.613229	1.11285	0.72857	0.872906	0.794983	0.988725	1.20443	0.697605	0.918815	0.735556	1.07285	1.02029	0.773877	0.938504	25.2553	3.60289	46.5338	75.1548	10.2207	130.043	8.85077	40.7241	21.1434	15.274	80.5977	51.1194	40.9379	128.93	47.6229	44.2168	58.8985	47.4144	47.1959	77.5811	21.0646	77.8161	84.0245	23.3382	13.3937
C9orf3	6.79832	6.98328	0.884293	0.984075	0.940775	1.06762	0.933402	1.02721	0.923846	1.00684	0.958208	0.811443	0.671313	1.02651	0.934087	1.08815	1.08788	1.13417	0.848163	0.847408	0.953869	1.18217	0.733044	0.954499	40.7154	10.3512	75.8759	26.4375	61.9445	41.1038	87.9609	60.1762	32.7277	69.7513	119.437	41.5563	52.2743	52.8401	33.9486	45.668	46.0709	52.207	43.1052	66.9488	78.5038	83.8135	45.7755	50.683	66.3247
PARP1	6.48563	6.792	0.976693	1.0373	1.05548	1.07877	0.977237	0.964148	1.01597	1.52191	1.21518	1.11364	0.84545	1.06044	0.979894	0.979882	0.818398	1.20797	1.16125	1.11228	1.02276	1.06244	0.961491	1.05565	83.1135	8.64465	58.7356	40.504	90.1043	32.141	147.161	33.8474	47.6006	47.0938	159.515	38.2141	49.2603	26.8815	32.1649	39.0144	51.6326	33.3423	63.0487	33.5434	86.6813	55.2167	112.568	24.6501	99.1241
CUL4A	8.04867	7.98155	1.04481	0.969433	1.05331	0.91671	0.884273	1.00652	0.995357	1.02404	1.01548	0.99353	1.002	0.984643	0.955952	0.988804	0.960693	1.03049	0.996412	0.960296	0.990793	0.956331	0.837931	0.979419	54.9577	9.90239	55.2766	32.7973	39.9268	27.9916	39.8892	30.4407	39.877	38.4769	50.7571	50.1584	27.7401	29.7068	22.5691	37.0845	82.1595	31.1656	55.0375	38.0054	57.2412	44.7161	76.4413	23.1773	35.2816
HN1L	6.62039	6.60298	1.00449	0.961134	0.940259	1.01897	0.987767	1.11759	1.07496	1.407	1.08718	1.14706	0.922497	1.03227	0.987476	0.949318	0.966359	1.09942	0.899721	1.0851	1.05269	0.79124	0.939553	1.02248	89.3695	9.25503	53.7605	97.8176	62.019	36.723	25.8461	35.0291	71.155	42.3179	138.344	14.6045	43.1225	39.2308	32.6335	50.8738	104.135	32.6784	102.322	33.8756	120.048	68.1868	66.6443	27.6216	51.1726
TPRG1L	9.53208	9.62211	0.950099	0.923765	0.978418	0.972705	0.934836	1.09488	1.02332	1.01182	0.916543	1.03689	0.96113	0.992395	1.04323	0.966992	0.951427	0.987862	0.982554	0.997663	0.983681	0.94879	0.805747	0.974512	41.8882	16.7445	56.0819	72.7919	51.2604	69.217	41.2324	50.7927	64.5122	61.0941	85.4062	40.4229	63.6954	58.9994	57.71	58.6415	81.5926	40.0933	74.8018	61.5166	91.533	56.0134	44.4363	50.2266	38.156
CHI3L2	5.91636	6.00933	0.803657	1.15223	1.02746	1.07528	0.961148	0.836551	0.871685	0.835812	0.832594	1.04702	0.825521	0.840348	0.994231	1.02208	0.707065	1.08805	0.800591	1.0088	1.03333	0.776896	1.16122	0.93817	7.01343	37.9419	5.94747	3.07863	0.690588	11.7508	1.81981	1.6261	26.6306	196.519	158.361	67.9017	19.2339	3.17365	42.465	115.056	0.203866	176.748	7.22894	8.20267	20.5029	8.17232	11.1438	17.7012	0.0723528
RAB8A	8.12869	8.61858	0.961546	1.02108	0.951151	1.03087	1.16837	0.979822	1.0461	1.12244	0.937289	1.05016	1.15763	1.05398	1.07871	0.999993	0.871051	0.952301	1.11887	1.11804	1.03072	1.13328	1.3016	1.05167	145.481	13.3338	83.6904	56.4905	53.8799	41.2098	64.0006	47.4045	74.1816	60.5402	96.9796	16.2089	81.6606	43.3895	43.5899	50.7214	55.9595	48.3581	64.064	34.2615	84.0503	50.5325	65.4336	37.3866	83.1433
RRAS	8.1822	8.48657	1.12896	0.976923	1.07334	1.06876	0.903552	1.05616	1.05053	1.0225	0.939562	1.0259	0.923581	1.03448	1.05031	0.976858	0.956612	0.983702	1.04016	1.0003	1.07514	1.00252	0.868678	1.00755	60.046	16.6643	107.422	36.8619	52.9158	19.3672	35.1922	33.3645	67.7858	60.2929	62.4679	52.4868	109.814	19.8915	16.8979	38.5852	71.6346	61.2445	123.872	25.7555	84.6325	40.673	121.787	20.4148	13.3193
HGS	8.97348	9.16101	1.04708	0.997416	0.977443	1.04169	1.12003	1.11251	1.05383	1.03872	0.923508	1.07298	0.829405	1.0259	1.07162	0.998788	0.989553	1.01597	1.12827	1.02423	1.02028	1.00831	0.911923	1.0195	82.4031	14.4874	81.4491	49.0623	80.5538	49.9932	93.4814	50.9159	62.9594	53.6301	78.4297	18.185	72.1923	37.5133	41.3013	43.6227	70.0267	44.6686	81.6529	33.1709	82.4817	62.0323	89.3264	38.7348	49.2041
ACOT7	6.64907	6.93292	0.959738	1.13235	0.957969	1.13082	1.16836	1.22645	0.999171	0.985045	1.17415	1.03601	0.858419	1.09204	1.17876	1.0373	1.0568	1.01093	0.946625	1.1996	1.05141	1.05653	1.16633	1.06785	84.3295	2.91547	76.9964	21.1273	63.2339	32.5501	207.875	41.2057	143.278	45.4197	77.0771	5.82285	63.6209	31.6136	46.0883	48.691	157.445	39.0541	91.3126	42.6983	199.622	50.7969	81.5002	43.7868	77.6002
ATF3	6.69611	6.51849	0.654374	1.0065	1.1134	1.04745	1.05433	0.884426	0.912035	0.898106	0.791684	0.962653	1.18709	1.03253	0.894148	0.907341	0.878192	1.02321	0.896817	1.0405	1.06957	0.684917	0.869185	0.94326	42.0067	10.237	31.87	78.2462	69.1292	59.1906	19.7892	143.565	15.9694	222.612	158.56	15.241	24.554	16.0839	44.2015	55.8616	11.0983	27.354	44.2167	17.1628	42.2145	5.90231	106.6	64.8836	53.3937
CXCL16	7.31767	8.22633	1.06014	1.20229	1.09258	1.15669	1.32146	1.14167	1.02142	1.05851	0.900568	1.10173	0.97559	1.00666	1.06383	1.00549	0.97271	0.95328	1.16782	1.14872	1.03605	1.04146	1.05793	1.07079	158.946	14.9739	87.0771	95.6467	33.598	31.3561	110.408	41.9364	95.6311	56.7017	157.725	16.7702	89.5914	27.2722	48.1102	63.1366	78.5584	68.3064	50.1563	25.173	101.072	58.4004	69.7804	28.2641	42.6949
NOL7	9.68662	9.61132	0.959714	1.06421	0.996458	1.00681	1.0254	0.952446	1.06839	1.03071	0.998566	1.01886	0.811307	0.997416	1.04557	1.03773	0.965858	0.963858	1.16379	1.03086	1.05034	0.981413	0.98507	1.00737	78.2715	19.4733	49.5874	57.9685	81.6575	36.5696	57.7637	40.9723	94.031	58.9532	99.3417	26.1045	53.2876	37.8861	38.2731	50.0379	71.544	40.9758	96.0417	36.921	63.4634	56.1033	65.1679	38.2284	83.56
DDX1	9.9464	9.71087	0.943898	1.00891	0.98164	0.944005	0.944715	0.995595	1.03755	1.03255	1.01251	0.937117	0.934234	1.00047	0.960496	1.04213	0.972988	1.0219	1.02672	1.02874	0.999333	1.00145	0.87497	0.985806	76.3548	20.4204	62.1908	36.8369	63.5415	42.6385	72.542	49.4389	78.9584	71.8238	96.4095	55.997	54.5101	54.1874	37.0848	54.1454	50.927	47.5996	71.9583	56.3412	64.0053	61.396	59.4825	47.5779	45.9461
UBE2L3	6.9243	6.78121	1.04121	0.987051	0.999023	0.979334	0.961723	1.02963	1.04661	1.04449	1.01374	1.05692	1.22385	1.00708	0.951411	0.968984	1.08096	1.03314	0.96564	1.03277	1.00308	1.05359	1.00143	1.02294	48.8118	8.96318	78.9611	45.9423	62.6537	47.2007	74.4042	45.6976	99.5934	60.3331	81.5642	27.0174	62.4519	44.1206	42.8057	50.9529	115.06	48.0047	69.7634	44.3864	82.9522	62.839	67.2049	39.5526	46.8409
DARS	11.0534	10.9332	0.942237	0.976922	1.00603	1.00032	1.00441	1.03137	1.02549	1.01134	0.925804	1.05167	0.981332	0.99774	0.98525	0.951028	1.00167	0.977617	0.998483	0.976677	0.984967	1.00133	0.883221	0.986423	104.254	10.8985	76.3116	34.9459	65.8428	34.6347	46.3557	36.3641	59.5479	71.2379	91.3307	34.4035	44.8551	52.2974	32.9259	46.7278	83.762	42.5478	85.8944	39.2505	95.5694	51.6652	103.308	32.4927	164.63
ACP1	8.76835	7.96375	1.05392	1.07839	0.956956	1.06604	1.10908	0.830015	1.0256	0.907977	1.02849	0.990295	0.902515	1.01024	1.04867	1.0058	0.983221	1.06738	0.988976	1.06235	1.03258	1.06194	1.0351	1.01169	71.0949	26.247	71.095	52.0862	66.5854	36.1342	68.2771	37.1602	80.4746	59.4119	92.7501	33.2616	43.621	35.0816	34.5777	55.1	68.9964	39.1881	59.09	38.1378	87.2435	51.2849	81.0875	32.1981	160.338
RBCK1	7.61074	7.39865	0.96145	1.05862	1.00603	0.972134	1.03547	1.08788	0.997357	1.0527	0.964527	1.0555	1.09313	0.967283	0.977051	0.994288	1.07003	1.03444	0.998627	0.91037	0.945007	0.88262	0.847482	0.995809	65.3807	18.7744	65.095	63.4782	93.422	35.978	125.633	50.2659	100.345	52.9214	69.6175	25.7651	83.7464	31.1846	40.1723	39.3473	129.928	41.0834	133.149	30.0794	77.3299	43.2789	67.0773	27.3323	157.605
PFDN1	8.46032	8.31381	1.01667	0.976272	1.02878	1.00498	0.984496	0.968124	1.01906	1.00056	1.02173	0.94481	0.8945	1.03484	1.01179	1.04101	0.95463	0.987744	1.04479	1.03211	0.982985	1.03876	1.03665	1.0012	81.6724	20.3041	78.7438	44.8731	67.3331	48.7243	69.2384	57.2236	97.3419	80.7722	94.3137	46.678	63.4607	42.059	39.1662	50.3707	44.0336	55.1818	58.3948	43.268	45.1949	59.3096	90.8316	47.0685	56.8295
STXBP2	6.32555	7.48385	0.998011	0.974987	0.885748	1.0423	1.40698	1.0415	1.01606	1.03363	1.01579	1.04508	1.1631	1.07423	1.2611	0.997494	1.05923	1.07748	0.964862	1.19127	1.0388	0.928608	1.14044	1.0646	62.9405	26.2465	62.2893	79.4368	84.3906	60.5979	85.5007	49.2059	67.6546	44.3502	85.4217	16.5593	66.6751	46.1844	50.3281	45.7498	45.9798	49.246	62.5241	33.24	115.483	61.4675	53.5277	35.2408	90.9929
NPLOC4	7.18246	7.72056	1.08501	1.00952	1.07492	1.03446	0.985166	1.09341	1.02551	1.06176	0.948349	1.05402	0.936568	1.04067	0.975632	1.02827	0.977353	0.987469	1.09807	0.985031	1.02068	1.069	0.904327	1.01882	80.2665	8.44683	65.6349	48.311	75.1622	47.5374	116.366	53.6893	48.4921	51.6882	88.6356	32.4771	63.3029	43.2637	48.4807	56.7286	73.0195	39.2899	59.7804	42.5818	66.7869	47.0111	103.174	41.9205	41.4188
COPS3	9.69556	9.3828	0.940175	0.986801	0.990349	0.991406	0.963984	0.994999	1.01186	1.06979	1.04576	0.960891	1.03242	0.992479	1.01993	1.03829	0.990306	0.931902	1.01357	0.977867	0.965249	1.03232	0.975954	0.996491	72.3686	17.2826	54.581	30.8237	72.4387	47.0416	61.9306	49.9847	69.3423	60.9792	108.252	51.5635	48.5126	54.016	41.7923	49.2343	49.2532	55.0169	77.0992	54.1083	87.3221	66.4289	52.4336	57.359	145.027
GBAS	7.96856	6.95358	1.00313	0.949657	0.988685	0.866426	0.734949	0.989385	0.872628	1.03232	1.15736	0.949115	1.04817	0.935007	0.991354	1.01479	0.930491	1.02422	1.0128	0.939452	0.952852	1.02811	0.8671	0.966095	499.01	26.7843	78.8467	37.1627	41.5694	15.9036	44.2848	22.4808	24.4584	46.1223	61.0635	165.386	30.8306	27.6685	9.3186	26.6398	29.635	42.5628	102.192	58.8271	315.791	18.7109	44.9931	15.8946	57.8915
GTF3C6	5.67063	5.76883	1.03822	0.981412	1.01827	0.960626	0.988374	1.01133	1.01629	0.997846	1.08308	1.04321	1.01566	1.00957	1.00085	0.997469	1.01871	1.00586	0.991157	0.989141	1.0012	1.00377	0.964794	1.00652	64.649	10.7119	63.3871	39.0582	38.006	49.7537	53.1339	57.8281	96.588	68.3907	92.8384	58.7742	50.1086	40.5656	56.3445	54.0107	55.9348	56.5167	77.4415	56.1128	54.8973	55.897	67.2823	56.5198	59.5789
KHSRP	8.50658	8.45371	1.00504	1.0267	0.975508	1.07437	1.05392	1.09915	1.03081	1.00164	0.93457	1.0422	0.801325	1.0387	1.04519	1.02376	0.937009	1.04405	1.02545	1.00632	0.998764	0.994802	0.994614	1.00733	48.8704	9.3615	98.268	50.8083	61.604	41.9823	89.9683	44.3501	74.8328	70.0539	121.326	23.2576	53.0173	40.0382	40.481	50.7347	74.617	46.0561	98.3827	34.7633	94.0545	74.2306	52.8093	32.551	83.8592
C16orf42	7.23967	7.28603	1.00574	1.01441	1.00251	0.979504	1.00145	1.10984	1.0064	0.950501	1.01201	0.960753	1.0055	1.0378	0.98695	0.995352	0.977018	1.01258	0.873009	0.97329	1.01682	1.01816	0.969363	0.995665	86.3316	21.7583	71.9659	42.8302	81.9171	38.5139	44.9861	47.7992	69.1875	50.1802	58.9473	38.5229	58.3593	32.3766	42.7017	40.3329	115.317	42.0839	72.4052	43.4368	100.653	59.4277	54.6095	40.1928	39.9844
IMP4	8.84752	9.26507	1.01013	1.08604	1.04256	1.07106	1.0455	1.1225	1.0075	1.02481	0.957301	1.03635	0.998368	0.96052	0.992122	0.95071	1.0061	0.958251	0.964606	1.03512	1.02897	1.0359	0.916682	1.01196	76.7035	17.8167	63.555	47.3613	67.1837	44.633	92.4138	42.6339	60.6061	53.6778	61.592	38.0926	39.939	34.2136	29.4733	37.4436	104.121	46.0118	69.1879	36.5141	143.295	72.1197	66.0695	40.6714	143.923
HERPUD1	8.45829	8.45657	1.22069	1.05716	1.01699	0.997061	0.971731	0.805319	1.02516	0.997031	0.97299	1.01376	1.00736	0.912936	0.963944	0.924383	1.10753	1.14479	1.04289	0.95885	1.04913	1.03071	0.941539	1.00771	32.3375	43.4205	94.3514	78.7207	52.7861	36.6118	44.5433	53.0809	23.3832	71.2411	95.5474	75.5367	68.6893	34.2752	24.1246	69.2628	38.6011	29.917	57.5881	52.6468	82.1565	60.2354	41.2564	39.9992	77.0406
THY1	6.17878	6.23915	1.16648	1.27808	1.30592	1.48492	1.02872	1.26211	1.20203	1.36969	1.13463	1.10632	0.897559	1.04814	1.19464	1.03815	0.855756	1.08575	1.14189	1.14889	1.02715	0.989978	0.911587	1.12754	125.501	1.16495	325.168	1.51472	97.2584	7.75916	41.2389	61.6494	16.0211	208.659	69.873	15.3678	219.909	2.94672	3.60507	19.8299	31.8329	2.91342	63.7078	9.03766	183.739	23.0284	87.1737	17.5486	79.1512
COPA	9.78466	9.56526	1.02059	1.00166	1.0254	1.00218	1.0505	0.933774	1.05544	1.02096	1.10277	1.04787	0.843865	1.02169	1.04321	1.02651	0.937451	1.02045	1.12492	1.10101	1.02021	0.976784	0.89369	1.0129	69.2133	21.7711	79.7448	60.2747	104.764	44.6595	130.948	42.1375	52.9772	55.2157	83.4693	37.5174	69.5594	42.5364	40.1814	61.7784	46.0088	39.5926	78.6305	40.7696	99.8689	50.6624	104.468	28.2937	79.3626
PSMG2	9.11045	9.00866	1.01351	0.991829	0.941112	0.961957	1.08355	0.899302	0.994358	1.00443	1.02239	0.951993	0.880654	0.970821	1.02799	1.02962	0.974895	0.989142	1.02987	1.02523	0.967375	1.02327	0.926975	0.986204	41.5811	13.2943	83.7099	51.5425	82.9797	45.2965	57.4543	50.1932	85.181	73.3522	94.2694	29.6323	55.3332	55.7296	41.0129	51.3518	62.5749	52.6255	59.3442	54.4878	68.4088	64.0681	43.2589	40.4869	67.6647
NOMO1	7.0838	7.33269	1.03878	1.04486	1.02511	1.03947	1.05455	0.994049	1.03679	1.0091	1.06609	1.0078	0.878905	1.05687	1.03378	1.04559	1.05259	0.965064	0.930907	1.01375	1.01958	0.787084	1.08634	1.00891	93.8388	18.3064	71.1294	54.3435	145.568	44.1134	97.5957	34.4741	53.4432	55.571	84.0247	41.8314	85.5884	34.3833	37.2255	56.8342	47.3191	41.5217	74.8753	31.4114	147.102	57.3745	178.247	27.6459	77.3772
PRPF6	6.3455	6.11	0.975569	0.975382	1.00692	0.969419	0.968952	0.927311	0.999082	0.834257	1.04511	0.872161	1.08347	1.04563	0.995322	1.01937	1.09336	1.0536	0.861035	0.878505	1.04991	1.09425	0.925229	0.984469	56.1718	15.1157	68.6096	73.8226	63.874	46.77	129.757	51.2268	70.4308	75.53	71.2547	42.017	56.8678	43.657	37.7347	44.7542	82.0357	48.534	84.8959	49.6133	114.003	58.039	70.7607	31.3837	88.6739
RNF11	7.18152	7.27889	1.06817	0.959323	0.942808	0.899632	1.03309	0.989329	1.03305	0.983364	1.01643	0.989983	0.975911	1.04239	1.03678	1.02818	0.932193	1.02997	0.973475	1.07951	1.01762	0.98033	1.00337	1.00071	51.1078	12.5655	74.0933	46.1202	30.7618	63.572	33.0096	57.1009	50.8234	67.9859	82.211	49.5455	63.6978	79.8595	69.3846	85.6818	64.0285	56.7444	63.1533	68.8964	57.7168	75.0074	65.0076	58.3623	40.3025
NDUFB6	8.73648	7.99351	0.930784	0.953825	1.0008	0.998358	0.977707	0.914958	0.977841	0.956923	1.18264	0.887108	1.10943	1.02518	0.951309	1.03648	1.06798	1.07307	0.881095	0.929657	1.00901	1.05849	1.13082	1.00255	43.4757	17.9564	68.5234	39.495	74.8355	38.2304	71.9723	42.7743	92.6253	68.6216	115.897	76.7955	44.3276	53.0856	21.6201	34.431	84.7747	60.5954	55.6127	56.7759	37.3067	56.5018	75.5426	47.5308	99.4884
DLST	7.45841	7.59735	1.04587	0.997756	1.02426	0.963798	0.922987	1.09573	1.02361	1.06464	1.01985	1.08348	0.955183	1.01196	0.95451	0.974457	0.969683	0.994139	1.02039	0.947131	0.991251	0.99453	0.970054	1.0012	56.108	14.8188	96.9467	41.2028	39.3562	48.6125	65.1591	46.7518	65.6305	63.2994	53.8305	77.8698	61.9809	45.3145	32.6468	43.3334	82.8681	48.2077	75.3461	44.6886	74.5805	66.9287	66.407	31.7548	38.5326
COL5A1	7.38373	7.79249	1.17921	1.21009	1.28235	1.4449	1.08929	1.57491	1.2374	1.03239	0.925938	1.16778	0.856431	1.2335	1.18232	1.12779	1.00622	1.17398	1.23907	1.19064	1.16107	1.01658	0.738533	1.14621	78.6696	0.733701	444.007	1.73803	159.418	3.08479	44.5543	11.5702	21.8661	36.1014	50.4336	8.35907	289.461	1.31536	1.80155	9.04615	46.5249	2.30995	128.37	3.51496	62.2556	3.64979	183.48	3.20746	39.3891
SERPINE2	8.93595	9.52798	1.14281	1.14895	1.00611	1.23963	0.940085	0.986735	1.29968	1.03848	0.889014	1.03479	0.77443	1.02656	1.07411	1.00865	0.910638	1.05289	1.16365	1.04316	1.05868	0.976873	0.964276	1.03715	50.6092	1.6883	255.289	13.2777	61.229	24.8928	166.107	17.7167	119.219	160.682	201.492	6.92987	36.2826	14.9061	25.0754	24.3857	243.63	5.05447	256.216	10.1952	104.326	41.8308	90.1204	31.0605	20.6433
PHGDH	9.5063	8.15775	0.890403	0.952089	0.902164	0.87886	0.845687	0.856441	0.850081	0.958221	0.824314	0.931139	0.717458	0.738887	0.92735	0.945918	0.975971	0.82548	0.99363	0.977236	0.907167	0.900135	0.948674	0.892729	101.674	72.4333	27.0869	70.0334	87.1782	29.2881	24.0787	36.5931	4.18266	213.125	133.703	45.665	19.9012	57.6807	18.0484	38.3499	17.8746	37.1727	27.6568	73.1748	170.703	42.8822	52.8851	31.1006	267.194
DKC1	8.92454	9.43162	0.916339	1.06025	0.954995	1.07207	1.06403	1.15509	1.01228	1.02791	0.979709	1.08676	0.992224	1.04485	1.0177	1.00353	1.01724	0.962801	1.00971	1.08	1.03799	0.994535	0.957231	1.0213	93.2476	8.37968	43.7515	30.7279	69.7684	30.6258	121.115	31.5174	69.6139	45.7121	70.8535	14.398	35.5136	39.1414	27.4812	37.1122	72.8071	35.6688	92.0674	33.712	91.2762	78.3582	71.8221	44.5029	116.244
HP1BP3	6.59233	6.57208	1.03497	1.00803	0.982594	1.0193	1.07232	0.998013	1.02534	0.871392	0.950935	0.938661	1.04476	0.979749	0.979824	1.0079	1.02071	1.04632	0.828124	0.962691	1.02434	1.0183	0.888693	0.985855	64.7635	22.1451	70.7507	30.9345	37.1042	33.577	87.3523	50.362	49.4056	95.0961	128.029	34.6449	48.6359	48.227	31.1863	54.3421	76.9369	23.8753	66.6829	34.7191	61.559	56.9048	78.4396	30.122	45.6361
CUX1	6.10634	6.16453	0.956504	0.989392	1.00565	1.0807	1.00531	1.01652	1.02633	0.857117	1.04486	0.942794	1.22122	1.06423	1.05742	1.02026	0.987287	1.08483	0.831765	0.959733	1.01395	1.05941	0.984376	1.00998	121.702	17.5126	112.33	61.3605	78.8418	39.754	84.7493	35.1073	73.381	36.4692	69.9372	35.4583	76.355	45.4992	61.63	48.8401	60.4003	63.8505	116.54	60.889	99.4211	49.6249	27.5409	49.009	89.0406
HLA-DQA1	6.89441	7.09805	1.29453	1.286	1.02197	1.14604	1.3587	0.684355	1.00994	1.02149	0.912788	0.913241	0.937633	0.869402	1.10381	1.07671	0.964083	0.991285	0.958218	1.04689	1.00195	1.07973	0.985228	1.03162	21.6897	4.50495	103.67	23.7204	92.4307	50.4334	29.3204	43.2681	174.529	77.3748	236.825	10.8248	85.9942	11.1679	57.935	58.6527	2.07159	36.297	72.9282	77.37	16.9613	28.8382	218.555	41.822	6.53898
SVIL	8.20993	7.96066	0.960195	0.930801	1.03583	0.861796	0.734964	1.04236	0.931138	0.965523	0.937478	0.940829	0.985685	0.958877	0.916695	1.02412	0.959948	0.989749	0.97148	0.882999	0.938619	0.990619	0.89677	0.945547	38.6831	12.9078	63.4151	14.8375	61.3449	32.9631	9.08394	44.9998	25.7364	54.4881	72.5631	179.349	39.4416	30.04	34.6793	34.4385	36.2972	85.7837	53.0675	74.2382	55.6476	63.5859	46.3231	26.2033	9.72105
RPS6KB2	8.44954	8.50783	0.942859	1.01729	0.89197	0.899418	1.05277	1.15323	0.993633	0.986102	0.935163	1.03312	0.905648	1.01087	1.02176	1.01074	1.01102	1.01018	0.940234	0.985748	0.960936	1.01654	0.914028	0.985393	67.6813	15.4574	66.1365	38.1142	53.4951	77.6226	86.498	70.0887	51.2118	75.9884	43.271	22.1377	37.0929	70.671	91.5556	81.4215	75.7163	51.5069	59.3955	93.9231	61.5229	51.9315	47.2833	109.934	50.7068
FAM38A	8.57662	8.71625	1.09588	1.03154	1.01628	1.02204	1.10315	1.23771	1.05311	1.07528	0.980568	1.29061	0.933438	1.17262	1.1142	0.935551	1.14942	1.0728	1.18767	1.07902	1.10839	1.08079	0.872495	1.07679	85.8436	6.7378	87.2746	22.5896	67.5471	41.9527	76.4832	35.5612	72.6665	53.5867	66.1361	12.9511	83.2505	20.6105	36.892	45.0893	115.434	34.2131	93.7061	23.3143	122.045	61.0493	177.94	25.6911	30.4235
MRPS18B	8.94411	8.18852	0.973799	0.997275	0.982158	0.864218	0.904734	0.946896	0.964833	1.02225	1.10979	0.932938	1.03206	0.98971	0.911108	1.03401	0.992037	0.95953	0.964399	0.95469	1.00017	1.03641	0.858113	0.972911	76.7966	26.5382	81.1481	55.3545	47.9648	46.5872	72.6115	37.1804	74.165	63.9135	58.5731	95.1266	50.1084	39.1616	32.4747	44.0444	91.4037	47.2669	71.6006	57.922	48.9386	56.5604	85.6824	28.4487	75.0136
MRPL40	8.09679	7.95559	0.968196	0.967476	0.994345	1.00072	0.910262	0.982562	1.03574	1.02766	1.01709	0.948211	0.825709	0.961988	0.936173	1.02338	1.00237	0.984735	0.966445	0.958293	1.00009	1.03817	0.981013	0.977649	127.731	31.2431	55.7403	73.6415	57.059	39.9593	166.687	42.8542	78.5404	58.6436	72.4644	71.5325	50.9767	42.6394	27.8438	43.0926	64.7825	46.6392	49.5515	46.3508	95.0951	43.4284	57.2676	34.3888	27.1973
CST6	6.31624	6.30513	1.05011	1.10603	0.813838	0.807239	1.16031	1.17355	1.04262	0.976212	1.07385	0.986528	0.991446	1.30411	1.15161	1.04587	1.12972	1.04576	1.1633	1.23422	0.977475	1.22865	1.55405	1.09602	56.1125	0.343337	38.926	13.9711	0.834149	37.137	12.928	41.5589	13.7083	2208.62	5.36613	1.24475	212.436	34.1874	73.8609	45.216	77.2032	14.3241	22.3695	19.2504	166.168	16.9211	46.0506	44.2067	7.0257
ALKBH5	11.045	10.9655	0.990382	1.01759	1.03799	0.992385	0.892738	1.03723	1.05316	1.03913	0.947606	1.02583	0.860307	0.938879	0.977913	0.986736	0.962431	0.987214	1.10076	0.950888	1.00604	1.01064	0.879693	0.985502	67.0611	19.5341	94.3096	75.6174	65.7529	29.7311	84.0473	38.4209	53.9401	49.3125	85.9199	89.844	51.8947	25.1068	35.3091	49.4432	109.523	52.3138	85.611	51.3061	85.3937	45.7418	68.3608	24.8052	139.377
IMMT	9.38711	8.88208	0.973943	0.993459	1.00459	0.941264	0.889426	0.976694	0.9462	1.08708	1.02623	0.982088	0.989444	0.953569	0.910222	1.04108	0.987961	0.984912	1.05156	0.95945	0.94543	0.945402	0.853147	0.973483	100.452	15.6944	56.0932	43.0112	60.1811	41.018	51.8026	38.2969	54.4589	60.7372	89.0517	101.796	47.4179	40.1498	29.337	40.1455	67.1351	47.7321	66.1381	53.8126	79.4022	51.9922	79.5292	30.917	128.005
NINJ1	8.19184	8.3312	1.09888	1.07294	0.984328	1.08495	1.03558	0.981052	0.983947	1.05794	0.907683	0.899214	1.23168	0.966444	0.933749	0.984241	0.911302	0.906112	0.971789	0.980404	0.975295	1.04931	0.852256	0.993766	103.436	34.7836	91.0939	44.9055	108.674	23.3911	77.5083	54.6795	79.8417	118.831	345.976	44.093	70.2766	25.2894	22.9104	28.4162	24.6349	31.3123	62.4302	46.2438	148.251	27.6834	109.809	26.8159	33.9291
IRF9	8.77188	9.65989	0.923896	1.21113	1.06409	1.11663	1.20052	1.05063	1.04243	1.0503	0.978299	1.06556	1.07459	1.02045	1.04124	1.03355	1.00175	0.995784	1.04688	1.03056	1.0249	1.01327	1.08709	1.05112	46.5224	13.7988	142.735	90.5736	10.4341	23.4731	112.091	33.1517	114.818	37.5559	57.9748	14.9329	151.387	30.416	62.0815	75.5186	56.9128	47.3916	92.9941	42.0116	86.3391	18.3269	68.3981	14.2586	13.0187
MRPS18A	7.62142	7.09514	0.985879	0.992017	0.959895	0.96379	0.986488	1.07941	0.985556	1.0409	1.04671	0.947272	1.02611	1.02935	0.888092	0.988642	0.852268	0.892937	0.958265	0.911251	0.954252	0.665311	0.760722	0.948339	81.7374	16.8457	61.3512	82.7291	70.4795	53.8635	59.4825	56.7757	71.0442	52.2638	78.6867	45.8992	48.9409	48.2311	40.9452	41.318	69.2906	49.1045	64.8149	47.2298	34.3081	55.3027	84.9793	54.2465	73.2668
TCEAL4	8.70934	8.60262	1.01673	0.951745	1.0058	0.952595	0.90437	1.09674	0.939688	0.997569	0.985147	0.932497	0.878764	1.01997	1.00782	1.00097	0.943151	0.927304	0.946121	0.992324	1.00457	0.992535	1.00959	0.976476	88.4617	22.9458	98.3462	49.0301	76.3136	27.4932	122.621	52.551	42.3177	98.4509	61.9813	53.4246	46.2208	47.1568	21.7517	43.1011	61.0207	31.6412	52.781	56.2034	84.978	46.5029	49.9	37.3141	105.505
C3orf37	7.10352	7.01205	1.03581	1.03601	0.974558	1.0991	0.97402	0.951942	1.01021	1.13669	1.15875	1.04105	1.01496	1.01138	0.987906	0.991341	1.06222	1.04749	1.07485	0.996642	0.976203	0.884457	1.03285	1.02373	71.217	6.62226	61.0075	49.6306	112.264	36.2434	85.9816	42.762	53.9864	58.3209	136.355	25.3269	57.036	41.4596	33.8867	39.7611	72.0553	39.6763	65.7885	36.4712	80.6644	50.5066	143.056	26.9811	109.937
FBXO7	7.23703	7.21366	1.02329	0.970009	0.978968	1.03393	1.04755	0.960811	1.02808	1.08426	1.09878	1.03092	1.00485	1.03092	1.00335	0.998481	0.992029	1.03784	0.985437	1.04422	1.0149	0.945276	0.925035	1.01138	74.4808	18.7286	80.1808	84.2731	89.9643	35.0733	68.4597	44.4736	79.3909	70.888	109.656	32.7532	81.1544	34.9819	34.951	48.9856	64.6008	40.0836	79.4955	44.5104	77.7574	40.2704	94.1269	29.1584	67.0243
STK25	8.19029	7.28439	1.03523	0.973733	1.045	0.904228	0.867209	1.08541	1.00287	1.25878	0.99121	1.06544	1.04074	0.989536	0.906895	0.993802	1.02153	0.997108	0.94802	0.94159	0.962893	0.800287	0.692951	0.977355	35.6629	12.023	74.5511	43.7074	57.2871	37.455	68.6082	49.1451	58.932	60.3548	93.4908	84.3753	47.6864	34.6142	33.011	26.9285	86.8363	53.9945	97.4176	49.251	99.3574	63.6083	89.4062	39.2827	104.142
GALNT2	6.08229	6.00915	1.11827	1.05345	1.04491	1.07534	0.954786	1.04556	1.05157	1.14656	0.97627	1.07179	0.966392	1.04423	1.00378	1.01325	0.818932	1.01128	1.09149	1.09031	1.04971	0.763727	0.946026	1.01608	74.7185	5.0796	131.029	36.2571	116.92	25.7591	147.512	23.7154	65.3598	33.2153	79.8759	20.898	92.8921	18.0808	26.9259	32.5458	80.3197	19.357	119.836	21.6196	124.973	44.1824	355.684	26.2591	31.639
MAP2K3	6.84132	6.76732	1.02592	1.01749	0.990317	1.07837	1.04017	1.08236	0.984288	0.99396	0.975226	0.996815	1.06522	1.00902	0.975613	0.993025	0.989502	0.994132	0.932686	0.967228	0.989838	0.998271	1.00586	1.00502	67.9421	11.2563	67.4971	92.4673	56.8767	64.3521	39.8363	54.797	51.5885	55.8326	93.9807	70.785	47.7639	71.9235	38.5083	47.4881	83.7992	93.4601	71.8354	44.3472	124.846	61.6165	52.6518	44.8746	41.8931
TMEM165	6.5152	6.97502	1.00959	1.07222	0.998581	1.14977	1.27804	0.926679	1.07415	1.00795	1.10164	0.956785	0.875191	1.06041	1.15892	1.04343	0.918766	0.963322	1.14281	1.25595	1.00043	0.979747	1.08836	1.05061	68.6144	3.67173	96.1535	70.8872	32.8122	50.656	79.4157	57.269	56.2669	71.4824	130.951	9.36274	63.3711	68.9259	59.2615	59.3198	50.0711	99.4567	75.9771	38.9414	106.974	82.4208	79.8501	54.2376	39.0087
C6orf108	7.11957	7.11541	0.992923	1.05955	0.990935	0.999415	0.963348	0.990351	0.978153	1.01499	1.11745	0.939832	0.856435	1.03247	1.00902	1.03294	1.04646	1.01461	0.953348	1.0246	0.991322	1.10762	0.966017	1.0039	93.1148	27.8883	73.8641	111.714	86.4713	46.7839	63.3986	51.3759	60.7152	70.5463	65.4976	39.7082	74.4156	41.4748	48.9296	50.5517	102.602	41.654	61.1019	36.777	56.1503	53.6251	42.8384	40.2813	61.3084
VPS35	8.97461	8.95469	0.964855	0.984138	0.956097	1.02244	1.07741	0.923574	1.02748	0.998752	1.11151	0.995006	0.857658	1.05834	1.11939	1.02917	0.941136	0.968114	1.05266	1.14166	1.01043	0.995619	1.01617	1.01198	58.6225	11.2598	64.3409	69.4998	74.582	54.1044	72.62	41.6421	68.1952	66.3977	123.244	25.8746	48.8351	63.8502	40.5771	63.5024	72.8914	39.6401	71.9586	44.7915	85.7056	75.5521	68.3343	40.3745	64.2871
YAP1	8.50905	8.41337	0.939302	0.914643	1.00951	0.94093	0.91365	1.02025	0.951632	1.00716	1.01872	0.878405	0.852276	1.0341	1.01661	0.988426	0.935367	0.962347	1.17686	1.12719	1.00556	0.99682	0.955538	0.98311	45.6259	10.7764	70.7521	36.0123	19.4673	42.6555	25.7556	39.8769	49.6749	72.5209	60.7483	31.0529	39.2165	65.4183	38.0461	50.2202	73.2822	51.2005	101.577	49.6131	94.5502	73.5649	39.3655	29.9473	47.9427
MPST	6.84835	6.71956	0.908577	0.933551	0.995553	0.994499	1.00191	0.993212	0.961445	0.962029	1.11607	0.925798	0.9855	1.02042	0.999379	1.02422	1.07974	1.04977	1.04062	0.982014	0.9596	1.07656	0.974786	0.999297	97.6656	24.3366	65.1895	70.0553	60.4776	65.0616	58.253	70.0964	75.4147	80.1872	52.2097	31.1102	55.2632	52.6055	61.8018	47.1192	49.027	54.8533	33.8398	41.3557	125.793	79.8967	37.3194	42.0185	70.6162
IVNS1ABP	7.49853	7.53559	1.10421	1.08368	0.9646	1.07468	1.05575	0.998763	1.05455	0.959915	1.00608	1.00382	1.13497	1.08297	1.1159	0.99594	1.03482	1.04701	1.02242	1.05766	1.0643	0.990729	0.817798	1.03193	65.9805	12.6414	93.7096	57.1158	132.516	18.7491	118.292	29.4144	116.292	55.1189	67.9214	18.4079	69.6184	46.1224	25.7525	34.3296	145.458	27.6684	194.904	32.5601	48.2583	36.4457	53.2662	24.6953	78.1819
SSFA2	6.47138	6.41058	1.00195	1.06028	0.986789	1.10889	1.1879	0.970801	1.11851	0.789323	0.974092	0.914137	1.00716	1.00605	1.03996	1.02055	1.11348	1.09879	0.890239	1.01202	1.026	1.07658	0.691398	1.00452	53.9482	25.4973	71.7676	35.5447	100.837	18.5674	72.288	27.6907	61.2763	110.575	61.5237	27.6713	48.607	39.728	26.2382	49.1515	102.324	37.804	118.438	41.0037	142.199	26.3943	90.1458	47.2784	120.235
AIM1	6.51378	6.30723	0.967292	0.849348	0.878764	0.774872	1.17455	0.967387	1.02446	0.59978	1.06634	1.11832	1.037	1.04046	1.15216	1.0448	1.03611	1.26511	0.917863	1.10224	0.879585	0.758579	0.916152	0.97958	29.2269	4.15101	34.4493	46.4055	17.1286	114.535	43.2061	72.0124	88.2549	83.3797	79.647	4.39847	60.7967	120.061	93.9612	76.7343	77.9486	72.7575	105.467	75.7544	72.7659	149.324	49.4227	47.701	33.2685
SPAG7	7.88001	7.59052	1.00256	1.00576	1.03477	0.903277	0.843122	1.06665	1.03362	0.987492	1.01201	1.06143	0.954681	0.957334	0.925952	0.998711	1.07262	0.910361	1.0167	0.941502	0.976688	0.993121	0.974578	0.984425	82.7137	15.3414	86.2188	62.3238	49.878	37.3886	52.255	50.7705	95.0122	67.1912	80.8917	95.434	69.2946	53.5632	32.5272	41.5385	64.8661	53.2169	56.9872	54.185	91.8672	53.3914	50.5809	37.7272	114.392
FH	9.38089	8.88165	0.953442	0.953567	0.98986	0.929584	0.916213	1.03556	0.946781	1.02608	0.963959	1.05834	0.777899	0.973607	0.979402	1.02813	0.94415	1.02	1.10596	0.981842	0.995125	0.977932	0.918264	0.975033	49.0668	18.9229	46.8959	40.8772	84.5344	50.3074	152.862	46.0323	73.7949	70.1307	85.0063	99.1973	39.1552	53.2507	45.7006	56.3573	67.8338	53.0343	44.2541	66.4624	65.9143	57.1218	57.0151	49.5547	101.955
PFKM	7.32341	7.5459	1.07286	0.808823	1.06246	0.737844	0.639665	1.03603	0.933451	0.972627	1.17007	0.88222	0.759905	0.902179	0.898535	1.07186	0.907963	0.923412	0.973318	0.84803	0.943004	0.959238	0.794214	0.918938	31.0938	9.44913	39.7433	15.7223	49.4365	10.5486	39.2844	28.6363	22.7919	28.6725	27.1601	599.137	22.4479	19.8973	9.66667	13.0893	43.4711	90.0361	68.5053	105.918	89.2136	15.1465	56.6748	16.5948	74.4294
MARCKS	10.073	10.9221	0.991417	1.02181	1.05016	1.10329	1.16025	0.968612	1.08089	1.025	1.01118	1.00919	0.832562	1.0564	1.12334	1.03469	0.953103	1.01916	1.14906	1.14183	0.992692	1.00198	1.04202	1.0366	121.719	6.21817	140.629	43.6155	64.181	35.9611	39.2161	42.6712	82.5759	82.327	111.948	20.1556	97.6322	62.3904	50.1746	57.8888	33.9287	65.5558	76.9261	39.447	92.8583	61.7396	68.7073	35.2772	69.5301
MRPL32	8.8857	8.53351	0.960364	1.06879	0.971172	1.02842	1.04454	0.993679	1.0514	0.94098	1.01649	0.948246	0.983742	1.03069	1.01259	1.04345	0.996941	0.959128	0.979557	1.04492	1.05188	1.03021	0.87787	1.00167	47.1938	12.1207	52.7519	40.3756	50.5014	41.6327	85.1043	41.6264	119.778	72.159	77.6091	36.2523	45.1341	50.0254	37.6465	56.6561	100.377	53.0586	48.2963	46.5526	91.7315	60.4326	63.1421	45.506	105.653
BICD2	7.6347	7.89333	0.886391	1.03356	0.878032	1.14648	1.07359	1.09664	1.01901	0.987647	1.03891	1.03731	0.880927	1.13022	1.09782	1.03011	1.06542	1.03751	0.915599	1.07937	1.05932	0.960014	1.00987	1.02208	99.8379	2.33812	99.9017	18.5585	81.4195	51.7671	75.6429	56.8918	56.5203	66.4392	77.0241	7.9157	77.1411	66.0416	46.9844	47.4999	91.0342	33.0111	94.5884	61.0281	76.9088	68.5904	125.407	85.5236	94.4143
CENPB	9.30863	9.58083	0.969311	0.985436	0.995917	1.01105	0.956127	1.08798	1.004	1.00263	0.956395	0.963708	0.972073	1.02851	0.988678	1.00302	0.952286	1.02665	0.915847	1.01541	0.988021	1.00915	0.955258	0.989879	62.2288	14.9551	83.0129	55.6603	49.6417	41.3236	119.955	49.4193	60.5148	68.5874	80.0853	37.1634	65.1527	38.4702	36.5002	44.8658	107.06	47.093	101.876	46.0689	62.5827	72.8802	92.7361	42.3727	119.198
CDK2AP2	6.72136	6.92825	1.15943	1.14182	0.964149	1.12472	1.0985	0.944884	1.04054	1.02969	0.985098	1.10746	0.905044	1.02568	1.03303	0.965039	1.0065	0.930326	1.05923	1.10498	1.03215	1.01012	0.867714	1.02553	92.0667	10.7907	97.0308	99.6387	68.8575	51.1911	95.6878	34.8552	62.3515	37.9223	71.7826	19.5587	57.1616	37.5371	34.0856	41.5302	140.859	71.2486	88.7134	37.8034	242.199	70.1013	86.2343	34.3208	42.1454
STRA13	8.59681	8.54112	0.948789	1.04632	0.984891	1.08638	1.06651	1.05768	1.03372	0.995629	1.0331	1.03406	0.895799	1.05638	1.02554	0.985666	0.980305	0.992747	0.995557	1.02568	1.02758	0.997265	0.935162	1.00975	73.9756	18.6394	52.7694	54.3608	44.4394	57.4222	69.0508	62.7486	71.0407	47.0263	60.8176	19.7389	42.7625	39.3954	52.0757	49.3486	127.02	42.2287	54.7331	43.8068	93.1379	60.541	62.9883	45.7974	52.3568
NANS	6.90433	7.36276	1.00316	1.03715	1.03142	1.10551	1.1585	0.990156	1.08572	0.987082	1.15376	0.943534	1.12296	0.982566	1.09533	1.01403	1.05376	1.08412	0.991244	1.12643	1.05658	1.12803	1.26086	1.06723	64.1632	60.2152	53.5187	141.824	50.0784	55.8824	60.7084	39.6052	71.3414	43.7406	103.37	35.3343	43.4102	40.5461	36.7396	61.9613	71.8037	46.0227	53.8661	32.6471	110.189	54.7219	78.0418	38.3725	88.172
PYCR2	7.33074	7.06659	1.05279	1.01539	1.00894	1.0937	0.982693	1.01107	0.939171	1.22284	1.15511	0.970453	0.902033	1.03183	1.00289	0.986079	1.01842	1.13713	0.941104	0.971491	1.00463	0.868013	0.872857	1.00898	125.401	11.4837	80.3737	86.0663	148.583	35.4009	152.157	29.6046	49.1542	44.4216	93.8434	43.5993	43.7765	22.6734	21.8378	34.3128	125.274	33.4908	49.7418	26.3023	241.233	45.823	68.8376	24.1633	135.361
MAPK3	8.93401	7.75962	0.973207	0.869879	0.896178	0.843992	0.965771	0.974072	0.990511	0.984193	0.929841	0.944212	1.0387	1.06503	0.970494	0.968634	0.955556	0.996382	0.899424	0.931894	0.974749	0.687833	0.817759	0.937062	68.1357	14.732	57.4862	78.7403	40.9693	118.264	52.185	91.2815	32.1066	61.7915	62.5607	33.9947	54.4032	91.3166	93.1873	66.4225	43.7588	38.5164	49.7505	77.6607	69.7005	94.4299	62.1825	60.0951	48.4114
NRD1	8.09393	7.25528	0.961209	0.996991	1.07324	0.900818	0.87786	1.00862	0.960447	0.808547	1.15697	1.06229	1.26881	0.987467	0.89277	1.03637	0.973651	1.1284	1.03467	0.925088	1.00684	0.709178	0.73282	0.976336	62.9948	9.4864	63.6872	44.4725	48.9104	39.5197	79.4426	48.1935	55.5622	70.1142	84.0877	78.0005	50.5087	42.5394	47.901	55.3218	94.6772	52.3394	76.2284	63.3441	75.2436	50.6768	107.8	36.1025	75.7025
TAF7	7.96013	7.6459	0.981709	0.969704	1.03491	1.02112	0.8918	0.939396	1.0048	0.879115	0.921547	0.913556	1.08532	0.982502	0.984431	0.98335	1.0444	0.998678	0.83192	0.911438	0.988328	1.01659	0.876709	0.964825	54.8486	17.5335	85.5959	59.0846	78.8278	37.6551	63.7989	44.9466	32.3226	82.7682	103.988	63.5681	56.3095	51.6807	36.5254	48.8522	37.4796	68.5399	44.1672	50.19	59.6399	47.9834	91.1599	33.5067	81.2332
FAM100B	7.32802	7.25303	1.01281	1.02821	0.958586	1.08221	1.04642	1.04788	0.977902	1.02334	0.995758	1.13549	1.02586	1.02366	0.995521	0.995207	0.939817	0.954926	1.07929	1.05728	1.05306	1.01144	1.00397	1.02136	93.869	9.50109	55.507	103.471	46.638	63.1699	103.862	41.3152	73.7583	57.7838	84.0782	21.9163	54.2248	35.3578	45.9131	34.6372	70.7436	52.9176	61.8747	30.0054	59.3755	70.0764	80.7848	37.2535	77.543
VARS	6.91203	6.87275	1.01236	1.01267	0.976857	0.937371	1.03594	1.06115	0.995066	0.912643	1.09303	1.01785	0.933811	1.07177	1.04598	1.0146	1.07425	0.970785	0.938445	0.960303	1.02912	1.0585	1.13499	1.01369	88.1212	7.86662	50.9898	59.5386	87.4455	59.1615	90.8358	51.8331	88.3782	62.4202	54.9937	24.3465	57.9846	34.2802	45.7118	47.6093	51.6652	42.1629	79.1404	40.8074	61.0127	73.7932	89.2466	41.4403	79.4822
CAPNS2	6.34738	6.30896	0.634719	0.860776	0.731625	0.925972	1.4041	0.990604	0.813546	0.759732	1.08987	0.923668	0.760713	1.20959	1.0089	0.99352	0.960172	1.04565	0.727361	1.06388	0.923078	1.02742	0.835325	0.93763	44.222	0.466002	23.8191	27.4776	15.4531	101.766	20.1533	145.654	54.9755	139.219	20.4675	0.167956	48.9846	99.4069	110.089	48.7818	22.1453	89.0548	50.2266	108.544	19.6005	70.7781	47.8013	106.339	49.8058
SMARCE1	8.01992	7.72578	0.970354	0.992237	1.01325	0.959984	0.956459	0.972201	1.02268	1.0004	0.999464	0.95567	0.812931	0.967149	1.01708	1.02338	0.942213	0.945647	1.02738	1.03793	1.01554	0.991221	0.993352	0.98174	77.7659	13.8866	76.6469	52.5187	55.7135	39.7446	72.6951	42.2925	64.3572	87.8788	115.664	34.4741	54.0352	47.5512	43.6161	58.7569	70.0877	42.6886	65.7022	43.9878	71.5233	56.6497	79.5635	36.4934	106.972
DCI	6.95126	6.7075	0.975204	0.955523	0.941311	0.954834	0.867418	0.975699	1.00119	1.45415	1.15611	0.88115	0.783508	0.998967	0.807861	1.00893	1.11776	1.07789	0.918746	0.799839	0.920324	0.713788	0.728736	0.954235	99.4966	50.7299	66.1647	70.2575	113.518	49.3085	26.7876	37.2211	42.5154	70.8603	111.322	97.8759	40.5917	31.6253	29.0405	40.1509	78.5074	44.1986	47.5487	37.7915	77.3866	44.1551	58.8176	30.9313	58.3075
REEP4	6.48611	6.95479	1.01521	0.968073	0.923233	0.958402	1.13566	1.05902	0.916197	0.829548	0.975959	1.18643	0.737798	1.16818	1.15875	1.02154	1.11157	0.94654	0.973428	1.13971	0.945072	0.828996	0.847609	0.992711	56.4075	1.65668	72.8083	36.3426	61.2855	77.515	42.6553	76.9268	69.2676	61.1259	63.32	3.21428	60.3862	63.6843	71.3371	54.0535	81.4642	56.2432	49.2856	43.4561	55.9405	68.3328	92.1047	42.4953	115.839
CHMP5	8.76966	8.88651	0.980259	1.04374	0.95989	1.06154	1.12827	0.978547	0.997621	1.01901	1.04497	0.950123	0.854853	1.03436	1.0493	1.04244	0.94759	1.02887	1.06677	1.05547	1.02576	1.00237	1.04721	1.01519	49.2379	13.2372	78.3203	76.2176	99.8855	49.9708	73.0297	46.7584	153.072	64.8395	115.857	26.6082	94.6673	63.1887	27.5015	41.8299	95.678	46.9212	75.1654	48.6944	42.74	59.1574	117.948	36.8362	123.382
MAGOH	7.39789	7.56998	0.997207	1.08313	1.00271	1.01854	1.13602	0.974714	1.04309	1.16347	1.13051	1.01142	1.08271	1.00866	1.02815	1.02943	1.0239	0.922223	1.0775	1.07698	1.02748	0.991721	0.723365	1.02633	69.8903	9.59221	83.4921	45.9236	39.8813	37.6547	108.081	54.5836	76.8243	69.5331	148.626	18.8009	51.8222	47.8732	33.7877	45.6358	106.053	48.7045	77.6833	40.0789	91.4973	77.0156	88.5983	45.0395	55.6751
PGM1	9.49939	8.57831	0.964225	0.926691	1.02186	0.800069	0.707122	0.953578	0.973109	1.03956	1.06912	0.876434	0.941952	0.908085	0.866395	1.04833	0.926156	0.766505	1.02357	0.832751	0.989188	1.00051	0.855198	0.928115	27.7345	10.212	44.2297	28.5267	33.372	33.3937	32.3941	45.1702	30.9866	67.8227	64.3029	224.576	31.9823	24.9989	25.8564	31.886	33.5621	86.6371	62.3514	74.4693	103.121	49.9657	105.74	29.2533	45.8604
TXNDC12	6.33311	6.72799	1.04311	1.0114	0.98288	1.02886	1.09097	1.02961	1.00638	1.60465	1.00487	1.20236	1.22718	1.06147	1.12865	0.954895	0.984973	1.00321	1.1594	1.1451	1.05036	0.654883	0.775726	1.05481	82.1411	20.1428	90.7645	47.9844	49.2683	31.8943	78.5478	36.8585	79.2519	63.0646	90.2524	23.7347	57.605	33.7011	28.1652	45.2972	137.286	36.6134	73.5852	26.9829	108.86	50.3762	113.85	33.9018	60.3165
CAPZA2	9.67772	9.95203	1.00316	1.02538	1.04556	0.970124	0.932719	1.01883	1.02834	1.03519	0.935395	1.02847	0.771712	0.98531	0.993625	1.04412	0.942582	1.01849	1.14842	1.03172	1.00632	0.998173	0.956266	0.996186	44.9754	17.367	77.095	40.2824	60.9768	48.5937	110.009	51.0274	65.7343	75.2183	101.405	75.3161	58.5833	55.1396	37.6955	48.5348	70.6672	47.1156	79.4404	52.5729	37.0133	63.4537	57.0693	47.0482	39.6982
ALDH3A2	8.26574	7.16652	0.833558	0.88923	0.91357	0.904114	0.890903	0.867014	0.872219	0.793966	1.02679	0.911573	0.830231	0.958868	0.982942	1.03102	0.873209	0.9456	0.902535	0.858605	0.842586	0.834201	1.00462	0.903208	93.6044	12.5217	26.4627	60.9805	156.672	65.4884	29.0813	84.9613	34.946	127.059	80.8331	51.5808	36.661	82.0624	43.4796	37.976	45.0739	57.6961	44.6166	87.169	43.4199	108.169	19.442	39.0343	110.777
ERCC1	7.9148	7.65481	1.04786	0.978472	1.00507	0.958606	0.921355	1.02361	0.929504	0.936458	0.978212	0.926439	1.03331	1.00434	0.93392	0.977579	1.00702	0.987024	0.885183	0.957245	1.03337	1.04197	0.978409	0.978331	51.5321	42.0297	69.0595	95.3213	65.4618	32.6322	53.1745	44.9524	123.53	92.0673	60.6922	57.7038	57.8294	33.4239	20.9818	34.8324	36.5452	40.8619	61.4532	38.1924	49.405	52.8138	63.3471	33.4226	92.2953
CDSN	5.53	6.17275	1.12881	1.20568	0.6719	0.654513	1.05912	1.18953	1.05865	1.71827	1.68406	1.32195	1.72936	1.35705	1.07426	1.185	0.775551	0.891018	1.40437	1.27111	1.05047	1.02785	1.18482	1.17349	115.84	0.0606764	14.1183	0.296759	1.62576	0.169231	1.22978	0.135086	9.41441	183.4	0.112809	0.0427953	11.7367	16.8403	71.1921	201.389	74.6569	0.428267	26.1909	78.9719	4.01526	0.259806	2.37792	3.30108	2.57182
ITPA	7.39495	7.86405	0.986181	1.03532	0.979194	1.02226	1.15648	1.15897	1.05732	0.99408	1.14862	1.03124	1.07174	1.07666	1.10724	1.02316	1.02428	1.1124	0.964632	1.06704	1.071	0.980422	0.965587	1.04923	78.0801	7.67028	50.6746	44.5021	50.7005	37.9247	135.951	57.8039	100.675	64.5632	70.1504	17.9869	48.4085	36.0811	38.88	37.0799	100.767	43.4439	96.1158	43.3867	88.0404	67.1828	57.5046	37.833	135.512
PPP1R11	9.89296	9.42456	0.952654	0.932662	0.964562	0.939511	1.09217	0.937558	0.999048	1.0384	0.951147	1.03439	0.890177	1.04015	1.02435	1.01535	0.954856	0.978631	1.13499	1.03217	0.995375	0.977945	0.984859	0.993855	76.8335	21.5865	83.537	78.9076	78.4773	51.454	94.6055	48.2106	72.2552	62.0792	81.9479	31.1031	68.829	52.7463	48.288	58.2469	98.1653	73.8535	92.7769	43.8334	48.7932	64.7931	88.461	41.8596	42.7699
CSE1L	8.43587	8.83339	0.938811	1.01996	0.968051	0.993747	1.05291	1.06444	1.00483	1.01344	1.10974	1.06569	0.937607	1.05047	1.07194	1.01656	1.009	1.00514	1.12515	1.03419	1.05214	0.9749	1.01244	1.02482	54.5426	7.40649	67.3909	28.6796	52.425	36.0265	141.083	37.0234	79.4709	52.8173	87.9128	24.5483	48.2367	48.4031	34.3128	41.7791	129.213	39.8358	86.2273	46.3598	123.602	63.416	83.1515	41.56	129.414
USP5	9.10427	7.74454	0.917227	0.99777	1.00758	0.946965	0.962364	1.12457	0.99387	1.01397	0.980881	1.10066	0.83853	1.07433	1.01538	1.01101	0.928661	0.96467	1.14095	0.986247	1.02098	0.994452	0.656708	0.984655	107.311	6.43115	50.1936	36.0357	101.34	49.6645	36.8796	50.9154	50.6839	59.9052	63.6752	35.0214	56.2889	47.4791	64.2071	45.9882	77.8039	39.3883	82.0743	58.5186	86.1355	61.0322	73.5709	45.8316	84.2921
AP3S1	7.89096	8.19934	1.04426	0.932633	0.943137	0.998439	1.03908	1.01067	1.056	1.02893	1.05555	0.946633	0.99554	0.995235	1.14247	0.998814	0.957487	0.97235	1.01775	1.13015	0.960989	0.982751	0.957806	1.00794	84.1791	15.8786	109.946	26.4777	137.752	48.2367	47.1893	53.239	109.463	77.0294	96.0794	21.6585	63.5778	55.3944	46.4537	52.2139	70.1531	43.5178	79.3884	40.123	59.2627	70.9067	98.4733	45.2074	43.0036
PDLIM7	6.44944	7.15007	1.34226	0.983788	1.22363	0.871405	0.713707	1.23691	1.1068	0.982666	0.992524	1.02423	1.11681	1.05101	0.947052	1.07547	1.01374	1.10176	1.05809	0.966321	1.09446	1.01486	0.964804	1.04201	81.6389	7.58292	197.422	17.7547	71.6568	16.2874	103.706	28.2366	81.5237	42.4304	60.9476	84.0514	90.7148	11.9629	13.6904	37.0243	33.9084	29.3021	86.0348	30.5812	60.0223	29.8318	132.746	25.6206	36.1284
NOC2L	6.49924	6.44942	0.974996	0.97925	0.961811	0.991835	0.982895	1.08509	1.0015	0.918742	1.01567	0.920267	0.823609	1.03528	1.01951	1.02718	0.993584	0.961431	0.801241	1.01551	1.03439	1.02926	1.1344	0.986069	42.4214	8.32162	60.6471	47.3062	34.5456	62.8462	113.356	59.3912	75.3498	64.7034	68.2353	24.8079	48.4501	43.142	36.6709	40.5177	102.814	55.8662	81.9983	44.0291	92.623	81.3029	100.364	53.0404	55.8566
ID3	8.94725	8.2595	0.987936	0.99114	1.07315	0.913918	0.986674	0.89383	0.920202	1.0229	1.04385	0.807931	0.70445	1.04433	1.04408	1.01798	0.89639	0.924345	1.03083	0.878818	0.931246	0.947038	0.807999	0.946145	47.5457	3.64316	197.258	11.5929	58.1507	15.1805	285.488	38.9126	83.6158	126.647	65.3226	61.3136	88.7016	31.6647	29.0371	50.6614	162.401	49.813	45.0348	73.3439	144.14	17.0162	64.2736	22.8611	85.3817
SERINC3	7.82125	7.99803	1.07199	0.992734	0.997595	0.995253	1.02077	1.00903	1.02723	0.96267	0.987623	1.04835	1.03576	1.07197	1.03755	1.00853	0.942058	1.07548	1.02557	1.05365	1.01073	0.96232	0.84643	1.00873	61.2545	24.1524	99.3099	42.6905	47.5653	42.2552	119.923	41.2319	57.262	78.7873	80.8442	40.7888	72.1131	48.6211	34.5722	57.0982	108.818	36.4316	98.9665	38.7867	119.334	56.1231	80.842	29.2018	76.6969
MYOF	8.08835	9.03224	1.00869	1.04146	1.04405	1.00944	1.16799	1.1167	1.07119	0.996658	0.898644	1.05253	0.916092	1.06554	1.08687	1.07058	1.05932	1.04122	1.03518	1.04214	1.03508	1.04946	0.931327	1.03525	73.1664	4.81269	110.537	72.8044	80.282	53.2812	34.6966	46.0962	115.823	77.8193	107.563	13.0201	92.2885	35.2361	41.786	56.1856	132.584	27.3271	104.8	29.8722	60.591	80.6684	50.1628	26.9794	30.2478
STAU1	9.0876	9.19044	1.00435	1.01602	1.02374	1.04292	1.01517	1.01062	1.00638	1.00963	1.03214	0.998913	0.991072	1.03928	1.00255	1.01055	0.964851	1.01049	1.07666	1.05863	1.01941	0.975959	0.963726	1.013	72.8248	13.0916	89.3976	81.1537	78.2937	45.6193	123.76	41.4241	72.2542	70.0347	103.815	34.0729	59.4568	44.367	38.1338	56.0017	105.031	46.5363	82.3723	40.7568	113.177	59.8698	72.0993	32.7816	144.938
POLR2E	6.17826	6.20009	0.944785	0.928741	1.03128	1.03257	0.985596	1.02104	0.955519	0.928447	0.937995	0.986814	1.08974	1.00258	0.972068	1.02061	0.944043	1.17093	0.865534	1.03388	1.037	0.70485	1.084	0.984668	49.8887	14.1534	85.1146	69.0948	72.7274	57.6935	40.2459	56.8672	57.6121	76.8908	87.1016	41.6873	61.6656	46.9835	52.8861	49.7304	56.2992	55.6387	78.6089	49.9836	105.791	69.8163	41.0439	46.9835	86.4985
CYFIP1	6.94678	6.84244	1.15768	0.982718	0.980476	1.04311	1.08051	0.947192	1.10661	0.959974	1.11075	0.997642	0.853545	1.03461	1.05167	1.02661	1.01857	1.10048	1.00617	1.11839	0.998354	0.997394	0.881987	1.02164	70.9838	12.2124	74.9384	49.8138	45.1318	76.938	51.9338	55.5724	84.0599	73.7542	111.815	23.3197	116.386	87.8239	55.9459	71.8252	68.1583	43.8649	101.53	48.3568	82.1868	80.2955	50.2096	41.2757	58.5096
KIAA0100	6.52141	6.67314	1.02008	0.978224	1.03006	1.00575	1.03883	1.04254	0.990606	0.857661	0.858714	0.839153	1.06369	1.05608	1.01616	1.01379	1.04418	1.07219	0.915953	0.958397	1.02395	0.974569	0.720753	0.977205	79.0722	20.9418	43.5659	72.8653	74.8793	50.6572	71.3661	56.3516	58.0762	73.218	80.0009	39.0083	54.7552	44.5465	57.1431	61.6531	112.84	40.2352	84.037	59.1087	80.5664	72.6168	78.9129	43.5882	93.3845
C11orf83	6.57598	6.3557	0.93773	1.0566	0.957866	1.01114	1.00294	1.08923	1.0194	0.938417	1.07451	1.03178	0.940723	1.02276	0.982776	0.955484	1.04517	0.992065	1.02411	1.00485	1.03	1.08265	1.14211	1.0163	62.178	23.0399	82.6664	47.2222	57.7719	46.2151	85.4259	60.5868	63.3837	58.8909	34.6891	35.9982	33.4454	40.8828	44.0953	39.1654	92.8724	45.1211	58.1767	38.2861	104.771	67.9816	49.2775	47.0004	86.963
ITPKC	5.74081	5.92231	0.974167	0.988789	0.968277	0.999761	1.07483	1.02619	0.985891	0.989123	0.85579	1.06614	1.00781	1.00119	1.02872	1.0067	1.01853	1.03732	0.894783	0.98996	1.02428	1.00724	0.95386	0.995207	25.7231	5.35851	46.3166	86.357	37.9527	74.6063	31.9119	69.5217	45.9221	57.7378	61.358	7.35547	71.4379	86.7847	38.0138	33.9713	42.2851	211.091	62.6164	34.6579	35.8855	71.5716	63.1877	35.2349	27.4679
GLT25D1	8.04708	9.22501	1.0452	1.09974	1.16695	1.24487	1.12868	1.2113	1.09117	1.16054	1.08707	1.26809	1.04377	1.14996	1.11234	1.01707	1.05362	1.02382	1.1818	1.13934	1.10028	1.05272	0.945317	1.11065	101.931	2.97521	105.686	25.5881	74.4676	20.9723	101.667	27.2043	83.6782	41.8837	79.5268	13.589	64.3636	14.6182	18.2041	26.741	93.4948	19.6346	129.269	16.5721	178.719	48.6761	233.85	17.6535	60.0985
RNPEP	7.43185	7.6732	1.05592	0.952889	0.924206	1.01834	1.10954	1.13593	1.03902	1.05485	0.932528	1.13044	0.998668	1.03368	1.0823	0.953667	0.973028	1.03257	1.03492	1.11792	0.967879	1.00904	0.828782	1.01839	84.8456	17.6245	54.9104	66.178	62.1018	66.8548	144.05	56.4451	72.6967	60.6689	71.9709	25.2794	53.8917	50.0784	52.2032	50.4638	139.033	56.5945	38.2056	44.219	85.7192	77.5177	63.913	32.6015	75.0102
TOM1	8.39674	8.38781	1.04295	0.921441	0.964837	0.905697	0.946439	1.06349	0.977613	1.02756	0.897319	1.05349	0.90686	0.980488	0.961107	0.995547	0.948148	0.980459	1.04881	0.975637	0.934424	0.993251	0.909164	0.973083	60.1709	30.7444	86.7851	74.7748	48.6434	97.7504	51.9381	90.1221	38.4143	69.6771	47.6088	43.91	87.9756	78.72	86.1186	62.2395	46.7615	65.6658	43.7793	57.3721	72.6298	71.7632	76.3435	52.1865	31.5714
C7orf50	9.53182	9.05701	0.998401	1.04526	1.01669	0.934703	0.903985	1.08279	1.01338	1.02306	0.897016	1.09044	0.949123	0.98221	1.01429	1.00629	0.965191	0.956873	1.03706	0.963165	0.997919	0.980719	0.848005	0.986027	65.2861	12.8316	76.5149	58.4366	160.318	35.8758	98.196	56.2546	63.9673	53.5879	66.3843	51.5175	38.8376	15.9711	36.9205	39.9909	55.9906	21.4786	65.7801	29.6988	95.6817	41.4063	100.867	42.9316	78.7308
SEC11C	8.44691	8.86539	1.10073	1.06348	0.910219	1.01612	1.16526	0.842905	0.991923	1.01326	1.115	0.961658	0.953149	0.965391	1.02536	0.964716	0.992432	1.00673	0.980261	1.06347	1.00909	1.00879	0.874383	1.00116	24.9599	153.821	48.7528	82.1283	43.879	54.6596	75.5573	41.9349	7.86879	75.1837	99.4367	69.6894	57.0958	50.8226	49.9756	103.099	52.3385	54.5239	44.7193	39.238	55.6853	57.1371	53.9921	37.3538	56.1714
TRAF7	6.14565	6.43464	0.950147	0.993497	0.990694	1.02212	1.04702	1.01384	1.01592	1.2269	1.15442	0.955837	0.831161	1.10708	1.14592	1.06519	1.06828	1.2006	1.01282	1.04671	1.00946	1.15724	0.87916	1.04257	135.197	9.25706	67.7671	66.9335	119.5	67.1536	41.8158	48.4008	46.0688	57.6326	89.7602	16.4689	71.8158	37.4013	59.1519	55.3421	132.445	43.7178	99.9538	45.8452	93.7269	80.971	70.4268	46.3388	99.8688
INTS1	7.10739	7.25066	1.04014	1.0498	1.01458	0.969879	0.954439	1.12259	0.993906	0.967581	0.96649	1.14629	0.999781	1.02198	0.989199	0.979311	1.2013	1.15368	0.929882	0.952504	1.02226	0.990691	0.772591	1.01138	79.3619	13.8555	49.0022	49.6291	83.4333	44.4086	158.824	44.7922	61.9307	56.4889	79.7905	37.3215	68.28	31.9924	44.4306	43.6286	74.3841	43.6871	71.2834	33.8688	92.946	51.1405	107.238	24.0008	66.7192
MRPS12	8.18749	8.35821	0.979169	1.05197	1.00717	1.04185	1.05077	1.13369	1.03888	1.04917	1.06463	1.0052	0.897226	1.02653	0.98257	1.03704	0.989009	0.970177	1.00085	0.99957	1.03557	1.02891	0.975258	1.01739	40.7682	10.7571	57.3129	44.114	77.2939	47.6539	100.815	41.5921	76.8776	51.0847	64.0471	33.1253	53.7574	36.1375	35.396	42.7623	72.4866	42.9505	67.8435	31.7277	59.0162	55.6939	62.254	57.5437	94.4272
PCDHGC3	5.95791	5.97414	0.981375	1.02932	1.00643	1.0068	0.992224	1.00459	0.997163	0.79505	1.09048	1.02873	0.876373	1.04501	1.05028	1.02892	1.08204	1.01251	0.88226	1.07975	1.01044	1.23023	1.05272	1.01346	92.3565	11.4596	196.848	41.5848	85.0174	62.4251	58.3504	60.9454	25.3758	114.962	55.1131	45.3573	92.9191	28.3823	26.5503	46.0194	44.5954	48.2014	60.9458	29.0253	107.528	85.8114	72.866	61.3396	51.7975
CYB5A	8.43666	6.89032	0.920637	0.961793	0.926103	1.08344	0.816711	0.856039	0.903444	0.955428	0.952957	0.739273	0.74622	0.893499	0.922621	0.972861	0.979817	0.930759	0.833879	0.954721	0.851694	0.987706	0.92186	0.910069	46.9304	12.7572	87.1307	79.8728	40.8185	43.3554	83.8163	65.0549	6.33021	302.957	92.3534	32.7417	28.1256	46.7467	52.3233	68.7384	54.1102	50.2699	16.4811	52.9641	84.7502	91.4222	37.9526	54.4066	53.5681
ACSL1	7.28663	7.54534	1.02648	1.00015	1.09761	0.944736	0.867737	1.00082	0.92355	1.0797	1.43701	0.957786	1.27174	0.936948	0.865371	1.02437	0.90268	1.05391	1.0797	0.960978	0.925757	0.913824	0.842527	1.0054	44.1188	26.9714	79.0722	27.8058	24.8385	46.5195	46.684	60.4616	67.5846	314.394	36.295	87.9818	48.6953	55.1588	65.8357	77.6776	50.1283	56.4242	60.8521	61.715	53.9401	59.8937	62.615	25.8117	64.6925
SH3BGRL	8.2658	7.84469	1.04361	0.980459	1.02236	1.02079	1.01392	0.839382	0.98203	0.999108	1.10217	0.892827	0.968827	1.02276	1.12593	1.01842	0.935653	0.995249	0.909629	1.15235	0.990935	1.02341	0.973193	1.00062	52.6379	38.7936	95.7181	35.58	14.8988	21.7685	30.339	33.7958	68.0707	108.783	78.2545	34.7303	73.8375	39.6047	25.1457	49.2464	28.0015	31.5865	44.3391	44.8289	53.4635	30.1523	32.4145	40.5042	20.9497
IL18	9.56029	10.1591	0.954852	0.943435	0.99722	0.978289	0.995271	1.03918	0.929873	0.991785	0.983291	1.0604	1.00759	1.16719	1.00829	1.09127	0.958151	1.08773	0.973964	1.10433	0.979422	0.986713	1.24145	1.02284	17.6989	1.12241	28.7689	32.9191	34.1045	85.0622	7.41766	48.7753	133.977	91.4564	41.0255	2.55696	68.0153	111.742	71.287	58.061	105.48	21.4587	33.8672	52.6552	64.2121	60.9394	11.9604	35.6977	6.73024
TAF9	6.67028	6.7962	1.01072	1.052	0.970551	0.991461	1.02453	0.885462	1.01992	0.910587	1.05877	0.9631	1.18214	1.00564	1.03696	1.0126	1.03915	1.07515	0.910164	1.08099	0.968549	1.06101	0.884249	1.00684	47.4074	18.0486	86.0339	54.4897	75.9647	40.5414	70.5287	50.3482	102.053	83.4197	111.246	39.2323	47.783	54.5366	37.9775	53.6964	66.0912	57.7007	64.9827	49.5498	61.6425	70.3194	96.7156	53.5717	94.272
TCN1	5.61998	5.39087	0.954498	1.3166	0.927306	1.18221	1.9251	0.664075	0.757036	1.37363	1.17068	0.866749	1.20994	0.613229	0.958699	0.95973	1.13862	1.02704	1.19093	1.0838	0.944438	0.98749	0.948226	1.05714	1.13285	173.773	0.544381	280.306	0.587784	42.8634	0.50182	1.2088	81.9514	65.1883	54.5877	435.216	6.2225	2.13839	29.0938	236.018	0.473142	8.90202	6.71268	0.0892857	51.5309	46.2194	12.7562	1.18797	0.0218489
ANXA4	6.4885	6.47069	1.00158	0.999811	0.948333	1.07594	1.15109	0.925858	1.04362	0.978139	1.19567	0.878919	0.726874	1.07795	1.16325	1.08155	0.921904	0.946207	1.00331	1.19623	0.965109	1.00783	0.984809	1.01305	76.5022	10.9761	103.239	99.6042	73.6235	37.9523	66.9742	49.0208	108.127	86.4516	159.926	20.7193	80.5877	39.8742	41.4325	55.6551	141.585	36.3869	79.723	41.774	77.3034	53.4727	51.3338	35.3744	44.5064
IDH3G	7.29423	7.25417	1.05216	0.989784	1.04363	0.954305	0.940321	1.07884	1.0124	0.947115	0.981391	1.04098	1.03337	1.02114	0.976523	0.996961	1.10167	1.08095	1.04029	0.911883	0.995164	1.04351	0.824055	1.00316	90.2993	18.4317	94.777	63.1236	122.416	51.7045	117.609	47.5683	57.9905	64.2157	72.6909	72.3521	59.9438	38.7147	32.1017	42.8854	58.6408	63.1963	65.6977	47.3153	91.2256	57.4579	63.6008	35.0367	54.609
THOC7	9.7596	9.16897	0.908257	0.964458	0.9732	0.987138	0.977195	0.880497	0.994192	1.01754	1.10598	0.915634	0.993861	1.0037	0.969274	1.03578	0.954033	0.953099	0.972924	1.0715	0.996553	0.993536	0.852258	0.977172	46.6771	15.0228	53.3577	56.105	49.0566	51.14	81.1062	62.0715	94.6497	106.761	75.0047	43.4058	52.8012	64.7268	50.6125	60.6092	60.4474	74.9437	60.9341	63.9545	49.1027	83.7497	52.5602	58.9615	59.327
CCL18	5.92087	5.96289	1.10288	1.23655	1.24668	1.34215	1.13301	0.873928	0.885903	0.98911	0.89246	1.1133	0.826859	1.0096	1.05724	1.00849	0.716408	1.10575	0.797739	1.08574	1.12142	1.35041	0.978022	1.0416	104.335	0.197733	68.045	2.1442	39.8045	71.2933	16.9282	557.685	209.872	40.2022	102.416	35.8971	205.022	7.77583	6.56859	13.8239	8.40137	1.00143	108.844	10.766	25.0056	162.434	39.8707	2.22543	41.8063
VPS24	7.25142	7.28555	1.03188	0.978221	0.950763	0.995104	1.01514	1.00471	1.08757	0.973302	0.948862	0.926387	0.932349	1.0597	1.02565	0.996131	0.964447	1.00924	0.914887	1.00735	0.948556	1.00051	0.934462	0.985963	73.5921	18.1401	93.898	52.0657	74.2023	51.4675	63.6425	53.9996	55.6991	80.6435	89.951	41.5614	64.1947	54.7391	40.7871	56.2772	86.2571	43.0172	84.2226	51.0914	66.6394	68.3618	74.5906	43.3259	55.7885
TGIF1	6.78748	7.02883	1.09167	1.08781	1.00382	1.1797	1.12362	1.01424	1.05078	0.947756	1.10538	0.982928	1.18284	1.10299	1.0875	0.987459	1.00984	1.01206	0.978114	1.12453	1.09655	1.05642	1.06284	1.06137	64.6659	8.54387	74.9492	84.8733	76.5601	29.5864	96.7527	56.3435	59.5393	103.426	93.153	16.0872	59.0068	21.3313	22.8374	33.6528	83.4163	46.6603	84.2576	16.0302	185.248	31.5098	58.6351	39.3365	104.238
CSRP2	8.47353	8.18851	0.839346	0.968945	1.0104	1.21605	0.908839	0.926819	0.924063	1.00231	1.00238	1.02479	1.00385	1.04457	1.05841	1.02687	1.02596	1.01758	0.900028	1.00435	1.10372	1.02556	1.08002	1.00547	123.446	3.328	91.2717	20.0665	39.3929	37.7269	19.1077	85.0472	214.719	24.7152	149.417	13.9524	95.5332	35.7678	37.6153	41.1263	88.9795	49.4817	44.9377	25.0694	40.4176	127.954	73.5234	69.2055	46.5572
ZNHIT1	8.88736	8.89847	0.999003	0.971448	1.0122	0.996913	1.01412	1.00125	1.04728	0.989784	1.03993	0.963898	1.05261	1.03233	1.01941	1.01365	0.983288	1.02092	0.988104	1.01133	1.03721	0.973069	0.838472	1.0003	162.102	15.8389	74.7904	50.0818	97.018	41.5644	125.441	51.7019	70.9564	69.8628	64.6002	40.4189	47.799	38.2527	37.3683	34.2822	74.9732	43.2794	52.2485	37.1397	242.834	43.786	57.5621	37.095	90.4276
CEBPB	10.4019	11.4377	1.01633	1.17345	1.07591	1.0857	0.978465	1.07911	1.05358	1.06567	0.93862	1.06315	0.818814	1.02666	0.999223	1.00831	0.936582	0.970467	1.1677	1.06691	1.04848	0.972525	0.995591	1.02577	141.593	6.24672	94.261	93.3187	93.4607	21.6476	165.731	33.852	129.762	123.437	89.8586	17.5148	73.0595	37.8372	43.128	37.8179	84.6897	84.5142	82.6397	32.4198	208.519	36.5734	103.279	16.3825	59.6774
CDIPT	6.93933	7.17231	0.996705	1.03956	1.01632	1.04979	0.981154	1.08197	1.01332	1.02238	1.05573	1.02659	1.0335	1.06114	1.03681	0.988702	0.972875	1.07428	0.970706	1.08991	1.13533	1.04907	0.942666	1.0304	89.7329	27.0179	93.6342	53.8444	97.2532	36.5229	116.246	49.5603	60.5666	70.217	83.6904	39.5503	67.0451	30.5476	35.9661	42.2112	112.628	43.8359	61.0096	41.4215	138.942	49.5783	61.3196	33.7169	93.7959
SRGN	7.85311	8.00793	1.28537	1.3248	1.2406	1.37168	1.22848	0.713341	1.08673	1.05482	1.03086	0.913641	0.93531	0.912946	0.959303	0.965206	0.978973	0.997939	1.09029	1.0561	1.08367	1.0073	1.02531	1.06013	158.191	6.97603	192.579	20.1314	52.0196	35.2925	38.1039	111.27	159.4	90.3916	170.197	32.5024	135.317	32.8732	31.1651	59.0144	6.86435	24.055	147.112	35.0704	65.2752	40.739	110.677	20.0001	45.0424
MICALL1	6.54516	6.91031	0.988613	1.0497	0.912917	0.971231	1.30488	1.25982	0.95362	1.49864	1.05295	1.19105	0.70014	1.18852	1.26192	1.02305	1.10123	1.09806	1.11291	1.18503	1.05904	1.04923	1.0609	1.09635	109.7	6.41278	58.1636	30.0281	56.4557	57.5629	58.4378	52.2542	104.579	61.9319	70.7341	7.15172	106.548	44.4887	98.751	75.2821	107.807	62.506	92.8	42.1834	107.932	78.9462	71.3842	36.1103	42.4724
ACP5	6.02932	6.63459	1.18798	1.19607	0.985103	1.10591	1.24524	1.07233	1.10724	1.52497	1.43904	1.1198	0.835938	1.10452	1.29105	1.02746	1.06242	1.08781	1.34514	1.21444	0.975205	1.58841	0.971372	1.16607	238.106	6.48999	147.05	16.1184	78.344	32.9684	105.782	59.5125	251.289	89.8504	67.0659	10.4953	150.314	34.2922	52.1423	66.6124	72.312	16.2988	97.2513	27.0111	108.144	27.7562	70.4198	36.2258	46.7112
EMP3	8.19946	8.92942	1.10697	1.06899	1.08266	1.19609	0.948573	0.951209	1.05627	1.01353	0.930953	0.90858	0.969575	0.989191	1.03352	1.00513	0.957048	0.973991	1.03597	1.00928	1.06737	0.998443	0.99726	1.01431	158.426	5.00189	216.791	19.9091	50.8704	19.5881	31.6155	68.7821	86.0708	66.7881	67.752	34.4452	125.916	16.6498	12.8042	25.1299	128.036	14.9471	142.748	26.1341	41.5476	18.0704	109.882	15.009	23.2755
BARX2	5.88179	5.91302	1.02072	0.712431	0.809293	0.770059	0.979698	0.920665	0.903031	0.82759	0.935282	0.959169	0.718143	0.849195	0.922452	0.967912	1.08675	0.859442	0.684519	0.962226	0.775375	0.800018	0.910007	0.874951	24.6407	45.87	17.4935	43.6484	13.954	96.2475	19.8834	191.825	8.97887	97.1723	11.4001	43.9575	13.0635	148.038	27.9946	16.1279	28.04	82.2242	30.6523	60.9508	76.9671	151.654	41.6222	109.896	17.382
MFN2	6.30144	6.42949	1.01303	0.988994	1.00947	0.964427	0.90421	1.19053	0.964526	1.54262	0.84409	1.05187	1.2459	1.01371	0.908473	1.01463	0.911541	1.14585	0.944707	0.87005	0.995214	1.01079	0.786553	1.01529	38.2145	11.0477	59.3585	47.3696	43.9439	56.1523	95.2539	50.7855	75.0078	70.4801	97.9573	82.9957	59.6618	39.7686	45.3997	57.5954	97.24	60.2019	92.2084	50.6055	86.0532	78.2473	103.98	37.342	50.4662
HUWE1	7.36586	7.32375	1.02495	0.965072	1.04758	0.958293	0.931854	1.00932	0.973606	0.97684	0.911752	1.04981	0.875827	0.999924	0.983608	1.0187	1.03044	1.03329	0.97871	0.99322	0.996729	0.960252	1.02389	0.987793	79.6025	13.3242	62.3194	63.9402	86.9334	53.4024	79.7037	53.2054	57.8797	73.9173	110.384	54.9705	80.2502	41.7107	48.5943	56.9056	90.8919	55.3545	66.3005	52.7999	94.6068	87.8712	117.015	31.2673	115.488
YPEL5	9.34323	9.03259	0.974404	1.01177	1.04314	1.04417	1.02897	0.925013	1.05248	1.05483	1.02685	0.930763	0.852797	1.0162	1.03826	1.02076	0.952452	0.980626	1.06116	1.03961	1.02611	1.00041	0.997915	1.00375	60.9264	19.9635	79.3106	61.1328	84.6042	38.4397	52.3773	86.1404	86.8573	107.717	108.486	27.6773	78.7925	75.0575	45.4061	55.8579	49.61	47.3452	53.5751	38.6343	50.695	34.1338	69.3311	71.6645	103.132
DUSP7	6.24303	6.2635	0.97258	1.02676	0.96212	1.04123	1.09081	1.04095	1.04539	1.28997	1.00866	1.10448	0.738029	1.14005	1.04661	0.985302	1.08505	0.980343	1.03685	1.15399	1.12218	0.900003	1.20427	1.04646	100.715	2.20872	54.1848	30.8997	56.5694	45.4301	73.8334	59.6133	87.3864	67.9697	48.4816	5.82745	68.3685	74.6499	60.5187	74.3514	85.5407	174.651	129.734	35.2566	106.388	58.9047	73.3822	53.9071	37.1358
SELS	8.62151	9.25845	1.06408	1.06615	1.01383	1.08	1.14664	0.976122	1.09898	1.07405	1.00664	1.03175	0.999469	0.991254	1.03628	0.98635	0.999828	1.00585	1.02832	1.13432	1.02746	1.0113	0.95008	1.0347	55.7587	22.2866	79.3622	61.7513	69.1416	43.2547	75.2603	51.3075	70.4873	81.5279	93.5376	27.0761	63.1774	50.7814	35.0739	61.2189	138.854	50.2982	71.5844	41.0497	129.912	62.4272	66.1268	43.9225	132.324
PML	6.02858	6.10025	0.984127	1.01896	0.993789	1.01996	1.05386	1.05511	1.05532	0.762662	1.07368	1.04893	1.35814	1.04798	1.07583	1.05838	1.1352	1.16542	0.864429	0.99711	1.09152	1.13091	0.985162	1.0465	53.2147	13.6936	120.568	81.5757	56.6123	34.1569	100.247	23.1129	186.858	54.9	97.1152	19.0411	154.192	24.9495	63.9062	78.4056	61.9386	64.9536	164.313	34.242	36.1944	34.0816	59.4175	16.1859	16.7983
PTK7	6.38077	7.20145	1.27688	1.16031	1.02544	1.27495	1.20663	1.32192	1.13543	1.13192	0.974479	1.37043	0.765384	1.2627	1.33999	1.05637	1.06002	1.23882	1.18522	1.41914	1.13279	1.05154	1.03347	1.16304	168.101	6.51406	179.082	38.7235	96.5791	17.1751	45.1607	19.2828	90.4667	61.8747	82.2414	8.21636	131.35	14.6691	25.9563	44.1221	123.482	16.3876	140.846	13.0929	82.6121	25.4738	128.927	12.3915	56.73
UBE2A	7.98933	8.26823	1.03491	0.999478	1.00345	1.05201	1.0223	1.00017	1.01808	1.07142	1.05166	1.20106	1.03294	0.998572	0.997471	1.00446	0.985739	0.916503	1.13487	1.055	1.02269	1.01004	0.922073	1.02547	90.7952	8.8196	81.6373	46.0697	89.2208	46.6509	157.223	44.9204	72.9231	65.2161	112.252	24.5676	61.1576	56.0746	49.1582	50.8767	64.7297	46.9803	71.3453	43.9615	65.2422	61.5663	64.1788	47.2103	71.2447
LASS2	6.87141	6.48878	1.04407	1.0357	1.03921	1.16193	1.08976	1.0031	1.03209	0.982482	1.17108	1.02654	1.11262	1.02325	0.97792	1.01081	0.820698	1.00166	1.03577	1.10601	1.04138	0.728546	0.904981	1.01665	72.0621	16.932	85.6788	50.5832	125.667	31.002	225.949	25.0716	99.8886	57.741	103.809	26.7942	58.4646	20.0993	22.0739	45.5119	74.4659	32.2513	82.3623	22.4637	72.026	53.8595	69.2191	21.4795	111.242
GSTM2	8.69227	6.91004	0.948576	0.933321	1.11652	0.916249	1.01792	0.980685	0.77154	0.921048	0.940506	1.00666	0.754344	1.03659	0.794089	0.973001	1.0228	1.03084	0.803021	0.874712	0.907459	1.00241	0.647565	0.923802	138.243	6.27295	53.198	28.9613	1.84179	10.1301	9.77223	10.8089	1.10653	13.9503	41.9529	80.4127	5.04512	6.08435	261.601	50.4025	2.31949	15.8129	5.23091	19.8125	89.4983	30.8861	16.6064	6.50272	327.754
DNAJB6	9.12089	8.06963	0.950591	1.02144	0.981504	0.995501	0.922049	0.884742	1.05355	0.869205	1.04856	0.996123	1.1434	1.08366	0.960304	1.04538	1.04932	1.07632	0.939121	0.980513	1.06384	1.04959	0.784754	0.995213	56.7504	7.6104	66.7932	37.7522	31.4652	65.594	61.5058	44.1934	55.177	64.1978	89.8132	51.6337	57.5092	59.1021	102.815	117.511	53.5777	104.549	63.3701	73.9154	35.8994	55.5413	53.9195	64.061	72.0679
CNIH	8.02019	8.33685	1.08564	1.0384	0.995134	1.13859	1.15433	0.888209	1.05551	1.02096	1.02685	0.934512	0.870634	1.04111	1.09689	1.02412	0.939033	1.00062	0.981022	1.08088	1.04138	1.0142	1.05647	1.02307	46.1971	14.7114	91.579	54.9444	42.7065	46.198	59.7793	44.2932	75.2875	66.8272	79.6183	33.8677	50.2118	47.8935	39.0617	53.0969	92.6926	46.9919	65.5021	37.044	83.6786	79.8449	77.1591	48.7921	83.6123
DNM2	7.43592	6.98331	1.0515	0.987199	0.988263	0.978369	1.03993	1.00885	0.96262	1.01366	1.05981	0.997947	1.34098	1.02034	0.971864	0.989056	0.802731	1.06795	1.08478	0.94183	1.0105	0.776785	0.974761	1.00332	107.608	15.1285	86.8802	72.1394	61.4312	82.7075	72.3138	53.3827	68.7573	67.8421	92.7206	37.707	71.9686	64.095	50.8176	56.7103	77.4549	52.0355	87.8958	54.0207	99.299	66.6626	79.6758	41.2424	80.987
HYOU1	6.84912	7.2106	1.08163	1.04555	1.01598	1.04615	1.10055	0.989052	1.00794	0.781999	1.08998	1.16688	1.17636	1.02771	1.08372	0.967501	1.03171	1.17607	1.11246	1.21476	1.07078	0.842666	1.04572	1.0512	64.0557	16.9282	80.3337	68.965	51.552	54.1172	51.9981	38.9563	56.8879	48.6935	91.1014	16.5509	68.9306	42.1114	41.2232	50.8484	98.1759	54.2847	81.7926	35.3238	318.81	91.556	95.6678	31.2574	114.197
PSMF1	8.49861	8.09114	0.958903	0.997411	1.0301	0.923702	0.897765	0.994934	0.968871	1.05054	1.06234	0.972232	1.02639	0.945108	0.864851	1.00295	0.959208	0.959357	1.01382	0.913999	1.00974	0.963926	0.883902	0.971431	61.7218	17.2226	72.1773	51.4538	78.5565	48.0591	117.678	45.8456	82.7147	63.0103	67.7824	58.7868	59.6891	37.7285	40.3713	47.5467	114.561	46.5516	110.895	48.2879	95.2253	62.7124	70.0716	40.9605	144.145
PHPT1	8.95586	8.59617	1.01338	0.936846	1.05128	0.987919	0.819178	0.963023	0.956348	0.924529	1.02767	0.857741	1.00513	0.939817	0.866683	1.01495	0.997497	1.00739	0.869303	0.883131	0.979232	1.02746	0.86976	0.952298	71.3403	28.5913	71.3761	50	69.9019	39.6078	66.3548	55.4857	83.2344	71.7204	79.7836	104.301	53.3856	41.2883	25.0265	34.076	68.6697	61.4216	57.0748	59.0114	65.0547	37.312	107.227	50.1477	68.7969
CAB39	10.4742	10.1968	0.975883	1.03957	1.03302	0.894788	0.990704	0.975492	1.09542	1.03606	0.97511	0.976275	0.861947	1.03285	0.959467	1.02771	0.964761	0.96743	1.11038	1.07513	1.06148	0.980039	0.933977	0.998451	41.5557	12.0807	73.9606	51.7933	45.1201	49.0342	54.452	45.2494	92.3641	62.728	103.012	62.5151	55.8259	63.5577	51.746	53.2866	122.419	47.9153	181.879	54.2098	80.2963	74.4967	73.5014	32.8754	25.5237
MFAP2	6.05041	6.12366	1.33823	1.15388	1.08919	1.17856	1.02322	1.25537	1.17858	1.06059	1.11782	1.18139	0.844533	1.23697	1.39788	1.04543	0.755615	1.12818	1.36781	1.33981	1.25544	1.15999	1.04185	1.15002	134.589	2.74713	261.699	8.13166	53.3373	3.27489	43.5832	11.7474	103.969	51.2876	36.6897	12.0147	195.418	2.55554	3.21416	5.39759	89.2151	1.30879	76.0228	7.12784	221.063	4.04192	119.175	7.81882	43.4748
WDR45L	6.5296	7.87304	1.03187	0.962321	0.963851	1.03922	1.11685	0.998213	1.0052	1.58734	1.03472	1.01279	1.18622	1.0737	1.05532	0.970511	1.06366	0.961464	0.817907	1.08508	0.966911	1.14462	0.990969	1.05089	62.1793	12.4671	69.2262	125.566	71.7853	69.8793	54.6774	57.0731	48.2588	58.6397	112.176	23.6915	55.4076	66.0971	50.4917	62.7827	65.756	49.2521	55.7904	31.8756	81.4235	88.9357	96.3477	35.5604	76.6079
SREBF1	6.78194	6.79703	1.00332	1.09483	0.964008	1.21815	1.14422	1.07379	1.01198	0.982874	1.05684	1.04654	1.18492	1.04615	1.08866	1.04647	1.16965	0.951017	0.971435	0.985815	0.987338	0.984806	0.954442	1.04606	168.88	33.2668	59.1752	73.4154	79.0934	46.189	119.356	72.327	101.968	150.229	102.539	20.2004	59.8646	47.008	84.1692	49.811	78.2505	41.8224	49.8308	33.1873	40.1576	68.858	117.646	30.426	54.883
TMEM179B	6.84479	6.80195	1.02509	1.06162	1.00546	1.08702	1.07133	1.04561	0.975289	0.821279	1.10181	1.02123	1.14683	1.05588	1.06371	0.964686	0.77698	0.995955	1.1126	1.13482	0.997892	1.11243	0.807967	1.01836	111.034	22.9353	87.9035	82.9931	56.4566	41.3237	60.2366	46.3186	68.0759	65.548	55.7322	30.3536	72.3684	35.0788	45.6234	53.6941	100.088	53.2176	56.0323	38.4837	127.371	49.4877	56.5574	36.7282	68.8573
SF3A2	8.2673	7.96306	1.03418	0.966727	1.01842	1.03613	0.988763	1.0407	0.946094	1.02921	0.958258	1.18774	1.12756	1.03236	0.999683	0.970548	1.04358	0.988937	0.914661	0.974894	1.0715	0.926224	0.732641	0.999467	60.5126	11.4321	110.054	61.4692	116.971	46.5127	59.4483	39.6135	96.6273	71.2169	109.467	26.0155	65.6886	34.8826	46.8185	46.2079	49.1518	56.3359	80.4376	35.9224	111.392	63.4596	52.2767	30.9072	100.05
BAT2	7.61028	7.58417	0.969015	1.00722	1.05838	0.962796	0.97097	1.03151	0.970094	0.99072	0.937803	1.07425	0.964259	1.05652	1.01534	0.99566	1.02625	0.996248	1.13052	1.00269	0.98337	1.07352	0.983375	1.00955	80.7955	10.7608	94.2171	63.3271	99.006	41.6449	101.243	41.6023	69.4628	83.0543	111.122	38.1254	64.823	40.3216	42.0785	45.1474	75.2838	43.5737	117.405	43.6931	56.948	68.4779	107.424	28.2038	63.382
GADD45A	8.0641	8.52645	1.17458	1.06595	1.16095	0.927576	0.940047	1.06546	1.03063	0.913978	0.998569	0.891566	1.14947	1.02778	0.979691	0.996298	1.02181	1.01759	0.900597	1.03524	1.04021	1.03206	0.864233	1.01116	32.4643	2.08037	109.965	60.0574	43.1039	21.8857	11.9384	62.2287	52.7796	53.4443	97.3223	77.1885	78.1203	21.6262	28.8425	27.0643	75.6126	64.6436	92.5015	43.779	104.155	25.573	90.7158	16.0399	61.5072
SYNCRIP	8.04152	9.19975	1.01992	1.02888	1.01943	1.0543	1.17494	1.06581	1.12246	1.10068	1.02383	1.05508	0.910753	1.06605	1.03755	1.01449	0.963603	1.00399	1.03917	1.16735	1.05146	0.986385	1.07021	1.04649	78.7563	8.04782	67.4422	36.8722	47.1459	49.9455	64.5058	59.0534	78.816	68.9865	115.114	19.8406	59.4865	64.8172	50.0992	61.5786	68.8986	49.7785	122.46	47.9524	81.7044	88.8683	98.904	44.2909	104.099
C19orf50	8.51877	8.48944	1.00825	0.994031	1.02279	1.06185	1.00825	1.00361	1.00512	1.02258	1.02174	0.968313	1.01382	1.01737	1.00199	1.00671	0.953588	1.03397	1.02905	1.00046	1.03726	1.01809	1.00179	1.01098	72.2731	16.9939	97.8797	62.1449	79.8	48.9546	82.9143	50.2961	68.2286	65.0458	86.3796	32.8363	54.4741	36.7853	50.4054	53.4879	55.6873	45.8277	80.5758	46.1877	105.896	61.4053	74.8357	43.2554	104.974
UCHL1	6.58338	6.53305	1.35744	1.22866	1.21734	0.956512	0.706277	0.983851	0.944511	0.978874	0.969079	0.891906	1.00437	0.836248	0.868159	1.07755	0.693157	0.792616	0.884086	0.789157	1.02985	1.07063	1.12356	0.971611	204.087	0.956314	30.7296	14.7436	24.7764	1.72723	2.31942	6.49537	0.990137	12.1677	16.9948	11.0089	11.6922	1.8023	3.36248	2.48489	2.27551	3.67186	4.46553	6.56276	742.698	2.99887	182.958	6.84389	663.848
NXN	7.92083	8.19781	1.0515	1.08601	1.04778	1.01245	0.954169	1.15212	1.03509	1.20316	0.949944	1.12283	0.821917	1.10286	1.04624	1.02535	1.06903	0.990394	1.16967	0.994028	1.03708	1.00702	0.832801	1.03388	93.9273	7.78222	104.36	46.7144	50.0216	30.3037	62.4043	31.4777	69.9755	51.5797	122.766	44.5298	87.352	22.3719	37.3502	48.4056	141.131	42.471	129.468	31.6749	159.639	64.5972	53.6835	31.5474	55.3672
PACSIN3	6.85662	7.19958	0.963387	0.935955	1.0988	0.872159	0.7903	1.05002	0.994991	1.00103	1.02423	0.993487	0.887279	0.94353	0.869616	1.03497	0.994047	0.911705	0.961129	0.866126	0.987255	0.98812	0.85317	0.953396	46.072	11.0054	59.9842	50.3795	55.6828	62.9064	58.7805	64.053	99.8828	30.265	63.4948	139.702	32.6966	34.0388	43.4691	31.3623	123.249	61.264	92.3038	62.9942	45.891	72.1151	109.497	35.7569	86.9606
LRRFIP1	7.39965	7.84843	0.951409	0.892829	1.01965	1.01101	0.940535	1.06076	0.89906	1.0044	1.2246	1.13368	1.35834	1.08284	1.07951	1.00655	0.940385	1.12049	1.09452	1.12784	1.0006	1.02229	0.96698	1.04468	49.5323	16.6145	76.9247	55.5493	68.7072	59.2474	59.4033	44.5979	73.66	51.4549	90.5431	29.4106	54.7187	66.683	36.9477	46.2669	91.5563	48.5916	127.379	53.4711	69.0453	76.4092	111.261	34.2965	64.2766
RRP7A	7.85368	8.26242	1.02253	1.08969	0.964122	1.05229	1.12515	1.12752	1.0626	1.0457	0.884608	1.14454	0.896605	1.04588	1.08385	0.970944	1.02178	0.911606	1.09725	1.01132	1.0581	1.0011	0.911607	1.02518	75.1086	11.7506	72.0468	75.1599	39.1209	43.6332	85.0936	55.167	83.1577	57.1228	154.401	48.2088	47.2613	28.1304	29.7333	32.5537	77.8631	34.1624	96.005	28.8122	150.232	84.7131	95.4337	39.9053	27.767
PSME3	7.70563	7.57698	0.957155	0.971848	0.96531	0.92644	1.09252	1.05414	1.02799	1.06493	1.22974	1.00006	1.1512	0.994597	0.995902	1.01969	0.896128	0.912004	1.03409	1.10543	1.00223	0.743305	0.870408	1.00072	72.9897	10.2369	61.2697	52.9676	76.6772	51.1967	97.5828	52.0242	75.8839	68.0955	110.771	21.2845	58.77	49.8345	55.2363	62.9387	80.9027	51.0651	79.8169	42.6515	93.242	83.5214	85.5624	61.9506	107.301
CSK	7.97258	9.17654	0.979225	0.944037	0.941191	0.935705	1.21624	0.962012	1.00915	1.01988	0.906263	1.10442	0.984069	1.00448	1.05545	0.979049	0.958877	0.945178	1.02475	1.07618	0.973203	0.987633	1.01887	1.00123	69.533	8.57837	74.7665	83.5508	62.2946	116.298	89.9519	73.8859	78.2903	53.9304	101.393	12.7767	84.3511	70.2204	67.3826	51.3238	71.6264	52.5078	58.0835	51.8606	42.6454	132.137	57.4246	40.6755	59.3718
ARL4D	6.26696	6.30366	0.808459	1.01185	1.0574	1.05169	1.05436	0.976491	1.13572	1.34033	1.02492	1.00762	1.04643	1.0701	1.07638	1.04379	1.08972	0.890582	0.921555	1.17711	0.990778	0.626382	1.13804	1.0257	38.2271	8.41258	27.4848	98.0798	66.1068	144.261	73.1162	58.9449	63.4493	37.9501	35.3466	7.39702	36.3281	59.9925	82.8019	44.3152	86.5139	116.435	51.9913	34.6362	42.1703	213.28	38.0257	68.4419	16.7255
RBM39	7.28954	7.47404	1.03014	1.03059	0.979424	1.03699	1.04134	1.00197	0.979304	0.913639	0.993727	0.935924	1.0062	1.05482	0.992486	0.978102	0.973206	1.03952	0.938766	1.00813	0.966631	0.999007	0.966859	0.993656	66.0411	8.1758	74.2491	51.4012	60.1559	42.933	95.7494	51.0417	59.9739	89.8846	238.043	27.4103	51.9765	69.1873	35.849	57.5595	108.103	64.1248	87.9457	53.5828	108.121	73.0855	70.1446	35.8732	77.5275
MMP3	6.28814	9.05174	1.73419	1.8156	1.24636	1.72162	0.994165	1.74612	1.89438	1.1823	1.20655	1.77153	1.3962	1.54926	1.36601	1.25983	0.909631	1.25428	1.59584	1.51684	1.29225	1.06604	1.13551	1.41212	2.05797	0.0174765	24.5116	0.233418	8.42269	0.732153	19.994	9.143	27.7167	100.651	61.361	0.57814	163.253	0.170933	1.97084	1.57595	2.76581	1.63728	105.632	1.3082	6.28808	8.48161	129.927	10.7364	3.48752
SQLE	6.94392	7.82713	0.989129	1.16127	0.890339	1.14143	1.4754	0.951429	1.01739	1.01002	1.08797	1.03825	0.963242	1.08943	1.35509	1.03821	1.00001	1.04887	0.981858	1.2542	1.0778	0.967921	0.974065	1.07206	103.446	3.20697	85.7467	29.8236	111.764	36.1886	69.3307	33.8427	147.831	56.5845	65.357	3.47083	60.0765	55.4142	48.9993	100.142	60.2198	52.3025	126.423	45.0468	144.701	59.6361	93.0816	29.4656	74.9446
MACF1	7.31819	7.29331	1.00534	1.04262	1.04562	1.07184	0.995402	1.14281	1.01664	0.648016	0.938583	0.959344	1.14297	1.04366	1.04809	1.02001	1.02493	1.1902	0.946368	1.00915	1.0747	1.04065	0.64142	1.0023	120.82	11.6722	96.1386	35.1523	37.9538	27.6816	90.4203	30.4782	75.9519	112.16	75.4853	32.8348	68.1722	24.5225	28.8006	62.2816	96.8118	38.0394	99.6913	45.5561	122.138	54.6626	71.7473	32.5631	50.7187
LCE3E	6.1223	6.39638	1.31137	0.831012	0.742368	0.75799	1.07304	1.27263	1.06249	1.06067	1.14316	1.23167	1.40432	1.26444	1.26358	1.26391	0.889472	0.962494	0.820192	1.17772	1.00778	1.01183	1.01342	1.07455	99.4512	0	10.3044	0.87019	1.09532	5.60041	11.827	1.1457	10.5207	20.0581	0.242187	0	35.1065	79.186	137.305	229.993	70.8204	15.6808	41.9901	327.94	44.0851	1.86559	2.20503	83.9995	5.92877
MYL3	6.14876	6.13715	1.10364	0.799269	0.959301	0.747921	0.555663	0.993871	0.859609	0.862411	0.594428	0.870448	0.905814	0.716892	0.726449	0.965701	0.735891	0.925526	1.07866	0.65259	0.732386	0.940265	0.870283	0.837954	0.543623	0.051644	5.47014	0.144455	1.22203	0.0776948	0.0570593	17.5178	0	1.71804	0.136276	247.065	0.60246	9.82489	0.0315484	0.121053	2.63743	61.3174	11.6722	155.959	0.0766767	0.046089	5.17925	9.28506	0.44943
KEAP1	7.35696	7.211	0.921994	0.937363	1.00923	0.990452	0.908447	0.980161	0.994666	1.06534	1.02592	1.00695	0.968343	0.986828	0.939391	1.03711	1.00931	1.00045	0.943209	0.939121	0.997783	1.05189	0.848957	0.979187	209.125	9.2832	77.4931	59.2159	120.937	58.7098	65.6061	49.8486	47.9048	54.2	99.1935	49.2318	55.6907	41.6231	84.3936	50.5087	59.1218	48.857	60.9049	50.5695	95.2976	60.0196	83.3047	33.8056	107.696
PAPOLA	8.86386	9.18205	1.01705	1.05321	1.02143	1.01796	1.08758	1.08927	1.01793	1.04412	0.965119	1.02342	0.839934	1.01611	1.03622	1.00638	0.931387	1.01605	1.08689	1.03453	1.02114	0.99594	0.995323	1.01509	86.442	15.5396	93.9058	54.7705	44.2099	40.0352	65.2898	45.224	58.691	69.0608	96.6118	32.9768	54.2327	52.8758	40.2824	52.3721	97.9607	50.233	74.9395	40.3684	89.0415	69.6604	88.0146	30.4659	71.9515
MRPS17	7.47918	8.02231	1.01908	1.14179	1.01119	1.04435	1.04239	1.14763	1.09974	1.39849	1.18101	1.09203	1.03487	1.06908	1.17342	0.974099	1.05777	1.03148	1.02648	0.989305	1.00521	0.755307	0.909794	1.05736	687.486	5.82971	77.43	28.2676	31.2932	17.9269	80.2786	21.7828	97.4339	34.9382	54.6557	26.7904	29.55	27.8927	23.2195	32.6376	100.452	41.748	159.319	27.5176	703.215	33.915	45.1612	30.9975	65.998
KRT80	6.41433	7.39672	0.864799	1.00102	0.7136	0.907271	1.37413	0.882581	0.956473	0.997904	1.1018	0.983135	1.09271	1.01363	0.997931	1.00489	1.03684	0.923117	0.959803	1.06541	0.949657	0.989291	1.24198	1.00276	53.6186	10.1234	32.9751	46.4565	39.2871	99.015	55.0689	31.1653	10.0708	120.207	21.1249	8.32218	75.8996	131.697	86.5065	99.3754	64.6857	53.0471	38.3684	148.229	11.5123	86.0896	33.4684	95.2328	60.9897
FKBP3	7.94113	7.62948	1.00927	0.965304	0.988059	0.939102	0.844704	0.998588	0.960755	1.00116	1.04648	0.992633	1.00893	0.96698	0.919838	1.01098	0.978207	1.01883	0.944281	0.879276	0.982639	1.00135	1.0016	0.974237	56.9694	12.8187	81.313	27.4079	34.4189	37.7133	58.2515	46.5415	81.9307	66.7681	62.5111	101.99	38.6984	53.2293	38.2222	39.28	61.112	63.6102	47.7644	72.7293	66.2683	51.0223	79.8805	36.2801	104.212
AP3D1	7.2846	7.21042	1.03867	0.997577	1.00659	1.05183	1.03253	1.00796	0.953022	1.0689	1.0589	0.984749	1.09837	1.0193	0.999015	0.997576	1.001	1.06211	0.965494	1.09797	1.05827	1.11818	1.06148	1.03236	48.992	18.8824	66.7954	84.4192	86.2367	69.5519	66.6942	53.6717	79.4531	61.0952	86.9777	36.6976	62.8856	43.4451	58.1342	63.3046	61.0054	56.8349	85.5291	39.332	135.125	83.6085	52.6527	33.9794	104.835
RAB13	8.15084	7.99133	1.05797	0.958945	0.983358	0.971048	0.967086	1.00301	0.98043	0.98756	1.00593	0.905957	1.14818	1.04483	1.02522	1.00372	0.999333	1.02134	0.803231	1.03993	1.01448	1.03103	1.03636	0.999474	84.1856	17.3702	86.9072	45.0146	66.4226	39.233	123.492	49.077	43.6085	97.2079	104.38	31.6636	55.393	41.8641	34.112	44.83	55.6328	54.8795	66.0911	45.0785	114.423	59.6578	84.6291	28.119	78.9017
CTDSP2	9.19942	9.20922	1.04767	0.976614	1.0658	1.05236	1.00544	0.963812	1.0172	1.11169	0.908789	1.0155	0.902394	0.973366	0.938267	0.987573	0.930025	0.972159	1.03892	0.97899	1.02058	0.992439	0.855526	0.988339	78.2894	33.2838	110.45	71.3083	74.9168	51.4316	67.1793	54.5001	37.7469	108.855	148.036	52.4316	80.9759	40.8865	36.3586	60.8699	61.1097	46.3152	139.684	49.298	44.8648	60.1712	99.0542	19.3885	49.4583
RNF7	9.05152	9.2827	1.00725	1.01486	1.01669	0.993354	0.978519	1.03749	1.05167	1.03475	1.0742	1.00966	0.836625	0.994038	0.988983	1.03076	0.944529	0.997619	1.05664	1.0453	1.0015	0.98398	0.955189	1.00255	132.074	13.3389	84.546	50.5724	91.2641	36.8314	74.5531	40.1327	68.5345	55.2683	73.5324	36.5488	46.8012	38.7793	35.4157	44.0362	89.4693	47.112	70.5472	46.7298	98.0322	46.4624	65.708	32.3464	121.489
VTI1B	7.83525	7.70471	1.0001	0.997768	0.9978	1.0079	1.01023	1.0097	0.98334	0.997934	1.19109	0.943402	0.869538	1.01641	0.98103	1.04758	0.986019	0.980875	0.907171	0.990125	0.999409	1.02169	0.939677	0.994227	64.0365	32.3337	113.912	55.1325	36.61	52.2668	54.3192	62.5847	69.6377	71.1345	48.0257	46.8548	64.449	52.0139	48.4355	51.943	113.121	49.6556	75.6068	42.4811	95.0582	71.4589	69.3363	45.8032	35.0835
RPP21	9.70447	8.79582	0.94207	0.963209	0.928726	0.951786	1.05752	1.00926	1.01143	0.993758	1.01704	1.0381	1.07734	1.09015	1.00951	0.992109	1.04974	0.974517	0.937869	0.997012	0.987552	1.04277	0.842887	0.995922	119.92	12.4434	91.6125	48.8063	89.2454	56.7076	118.197	58.0232	60.7309	53.9956	73.9454	24.3593	45.5921	50.2936	42.4202	34.5009	103.949	59.2636	78.6668	50.5157	49.9134	60.6377	86.9298	49.1636	78.2944
FADS2	5.95121	6.00598	1.00123	0.992156	1.01343	1.07752	1.00625	0.998807	1.01742	1.29673	0.988046	0.832115	0.926132	1.04855	1.05703	1.00184	0.874517	0.919403	0.86436	1.05142	1.09333	0.646569	1.18168	0.994693	144.669	1.16725	37.0758	5.17983	104.943	2.09053	6.88973	2.44226	4.7334	817.465	39.4593	12.4936	17.0472	1.05027	4.89379	10.4219	81.0329	1.28191	9.61074	3.43241	8.51336	5.87572	121.485	0.69611	81.9356
SCAMP3	8.00645	6.08221	1.02366	1.00322	1.01624	0.995754	1.00964	1.03006	1.02481	0.634411	0.999477	1.15101	1.15834	0.996525	0.964421	0.962472	0.921593	0.901208	1.12162	0.970342	1.01613	0.679961	0.93397	0.976897	70.8652	18.8429	68.3684	54.2598	100.309	52.2252	216.22	50.5836	63.0075	62.5045	92.2004	43.9794	61.8481	43.0506	46.0039	50.9817	62.3952	59.8371	59.7058	42.3553	87.3109	61.1766	68.9175	38.3988	89.3635
IL20RB	6.89094	7.29995	0.829667	0.842725	0.758924	0.880916	1.49419	1.39679	0.976766	0.944217	1.00811	1.12806	0.85007	1.19165	1.1551	1.0832	1.09875	1.19502	0.787472	1.29489	0.975024	0.960135	0.959424	1.03862	59.1577	0.101768	30.9424	53.7435	50.4934	70.5007	30.5973	71.1926	55.1078	31.1216	14.4156	0.913735	59.6898	42.9725	64.5786	38.4692	88.8391	77.1762	175.736	65.4381	22.6191	127.513	107.277	54.4842	10.8456
ZNF593	8.31249	7.7769	0.978039	1.04644	1.00856	0.993724	1.07177	1.15924	1.08022	0.994625	0.962498	1.139	1.04713	1.06743	1.0435	0.978667	0.956382	0.859697	1.00958	1.00263	1.05152	0.744971	0.815624	1.00054	43.9873	9.87372	47.2952	47.8761	46.0572	37.2017	89.4768	50.1111	74.1308	54.153	56.7267	24.5022	36.1997	32.5089	32.012	35.4797	90.8497	46.0505	73.8157	29.8111	160.969	65.3006	90.1398	74.866	68.9008
SLC25A1	7.43928	7.82516	1.01538	1.0395	0.936138	1.10058	1.15444	1.06254	0.996672	1.07993	1.02238	0.9695	0.858609	1.03247	1.1019	0.995252	0.900921	0.929979	1.10757	1.06336	1.00888	0.954145	1.05781	1.01847	187.027	17.0905	62.9155	64.0903	114.655	49.4452	266.231	39.5378	82.5632	71.6679	57.3816	14.5912	50.6392	30.3306	58.1891	56.4023	80.1337	42.4049	71.5415	31.7755	100.34	51.6493	91.4277	38.2084	77.1977
SPG21	6.49383	6.47721	1.05406	1.01757	0.960422	1.04128	1.05426	0.962388	1.05646	1.50012	1.11722	0.969095	1.24438	1.10533	1.10662	1.03596	1.00488	1.10705	0.893098	1.08508	1.06949	1.17917	1.23758	1.08578	87.6316	16.8574	105.673	60.3061	73.1068	31.5331	100.337	38.0935	81.2275	81.4332	85.9457	25.0839	61.6322	36.3331	36.8624	45.2293	141.98	45.3526	96.3586	56.5299	57.1284	55.5121	83.5405	43.1116	92.9314
RARRES3	7.70747	7.14013	1.00087	1.24285	1.02161	0.98938	1.40748	0.969297	1.06176	0.99995	0.719493	0.986215	1.14208	0.8724	0.834358	1.13472	0.962885	0.78723	1.04763	0.882236	1.03907	1.08897	0.977705	1.00801	39.5616	16.0395	123.094	237.903	8.77544	29.3908	63.5924	37.5566	372.453	33.8045	82.4822	31.9095	154.59	23.9072	110.676	83.3226	49.036	35.1221	48.1332	38.5445	15.1848	17.8033	62.2039	8.13002	6.06251
VASP	6.43019	6.6964	1.0642	1.00088	1.07977	1.10804	1.13095	1.04886	1.09004	0.914729	1.20676	0.901205	1.43889	1.09363	1.07429	1.04756	0.975984	1.15904	1.15036	1.04583	1.14275	1.25602	0.925184	1.08833	77.5928	7.64087	100.691	81.8547	95.8786	33.8866	77.0334	37.6151	81.6181	61.7243	100.042	14.9641	77.8358	32.93	26.5865	40.4349	96.8769	43.1412	110.763	30.9804	55.2123	56.202	155.326	31.2528	54.7351
COL18A1	6.79302	7.91297	1.06313	1.10167	1.15485	1.15647	1.05054	1.28281	1.0965	1.06203	1.03829	1.09406	1.08738	1.07956	1.05541	1.03329	1.03169	1.06833	0.986365	0.98588	1.04621	1.26328	0.78674	1.07259	88.836	6.61166	218.387	14.6035	127.138	20.874	54.4451	50.6438	37.7202	79.453	97.5011	21.3025	134.253	24.2893	25.9428	36.9789	63.8052	15.659	78.063	34.5522	75.8113	28.7896	61.3366	27.8553	82.7003
EIF2S3	9.38865	8.7102	0.990354	1.01346	0.983922	0.98595	0.989534	0.884359	1.0147	1.04725	1.0355	0.975044	0.989587	1.01504	1.0763	0.994676	0.928079	0.915157	1.05388	1.1319	0.988738	0.99705	0.768285	0.989465	35.8854	17.6098	60.9893	53.7002	88.0759	42.8513	82.988	47.981	98.397	89.5591	99.2623	31.669	48.8352	43.6371	59.9465	80.9213	92.338	56.3122	52.9772	43.777	69.0843	74.4928	75.9047	41.4847	129.19
CETN2	9.35146	7.94311	0.981363	0.985101	0.97223	1.00357	1.0484	1.06399	1.03645	1.06898	0.93178	1.06094	1.04214	1.09038	1.09394	1.00112	0.990204	0.953913	0.978498	1.07547	1.00391	0.972909	0.777687	1.00633	70.6177	12.1096	50.2695	288.695	113.527	43.3589	117.307	49.0754	56.9143	68.1933	96.8255	27.0008	53.7568	49.0643	40.3025	92.2422	73.8985	55.9357	85.0977	41.5329	84.8637	57.338	56.3013	51.4894	62.3472
PPP1R13L	6.84606	7.35249	0.949073	0.907024	0.83141	0.909386	1.30719	1.14821	1.0186	0.899891	0.930544	1.0325	0.950736	1.10838	1.20897	1.028	1.07002	1.02152	0.921121	1.0671	1.01578	1.01458	0.997061	1.01605	32.8335	4.57049	74.866	46.3529	70.6853	94.1594	101.46	66.2643	76.1187	75.7748	51.7692	4.97141	97.3645	68.2475	66.7047	52.1819	71.6399	69.9612	84.1671	48.7888	42.8501	79.1912	135.484	44.8727	14.6698
SRRM2	9.79441	9.69201	0.978033	0.958154	1.02907	0.966614	0.90848	1.05296	0.903884	1.00297	0.898674	1.09043	0.83195	0.983396	0.965064	0.989831	1.00437	1.02503	1.05491	0.974364	0.979949	0.997956	0.848455	0.97355	80.4817	18.0668	83.7372	78.4446	73.3137	48.887	52.757	43.6606	52.6969	94.8101	141.678	45.8134	60.2232	48.3881	44.9614	60.4521	64.9169	51.5838	82.0147	45.6714	86.0472	99.8575	77.1993	18.4159	56.2169
TGFB1	5.58422	5.71476	1.03596	1.05	0.991081	0.986157	1.02645	0.977639	1.02033	0.77938	1.15232	1.3039	1.34488	1.03987	1.0333	0.98259	1.05778	0.997581	1.10303	0.98435	1.02987	0.971318	1.49289	1.06479	95.3664	2.29264	186.36	28.2075	134.112	21.4236	72.121	31.1758	82.5436	37.7925	61.3073	11.9063	167.941	13.0359	38.7938	41.968	94.7264	28.1326	121.285	15.3326	93.7836	44.1095	175.744	17.3678	51.0949
DPY30	8.31981	8.28046	1.01153	1.04076	0.929582	0.994736	1.10214	0.925004	1.02132	1.03052	1.1172	0.937043	1.09958	0.996326	1.02759	1.02021	1.01701	0.924608	0.971785	1.01821	0.976543	0.933513	1.07878	1.00828	112.404	20.6029	68.2994	88.7722	94.8175	40.1697	75.3612	43.9816	86.3277	72.3832	140.052	25.6755	51.0882	59.7989	36.4729	47.509	100.882	49.5797	68.957	55.3312	91.4451	57.5494	103.03	43.8214	119.41
C4A	6.0667	6.11574	1.00788	1.01887	1.00238	0.991226	0.958785	0.990795	1.01584	0.697371	0.864524	0.934744	0.941937	0.96516	1.05628	1.04539	1.00967	1.10548	0.974177	1.03164	1.08129	0.89308	0.976935	0.979212	5.42071	9.47089	100.155	19.4018	17.9421	9.52768	46.9591	14.5837	18.6577	24.9978	45.895	63.0265	46.8323	4.35252	1.96959	40.3676	10.0966	5.50096	63.4919	11.9153	2.61059	26.4507	67.1867	6.7571	2.27103
DPP7	7.30695	7.29698	1.03929	1.00566	1.00845	1.07123	0.983309	0.978803	0.928016	0.948878	0.923142	0.941058	1.09782	0.953477	0.955999	0.912743	1.06115	1.04962	0.864644	0.893641	0.981113	1.05278	0.906523	0.978921	67.0421	54.645	100.942	72.8547	109.882	40.386	75.2016	53.9013	56.4095	83.9088	58.0083	62.7617	69.2742	29.366	27.0392	41.8999	80.266	46.3062	47.2566	36.5512	75.4283	54.0943	104.017	42.4005	91.9022
POLR2H	8.99193	9.34467	1.00811	1.04595	0.964358	1.11954	1.12886	1.1175	1.01131	1.04215	0.989084	1.08614	0.939894	1.00451	1.03513	1.01777	1.01228	0.998001	1.01913	1.00842	0.996835	1.01196	0.907327	1.02211	102.123	10.3777	89.202	52.9702	71.5112	27.8629	130.62	37.1301	60.8236	40.1114	104.763	15.6898	30.2703	29.4212	25.7695	33.9065	63.6205	38.9286	55.6056	29.8649	67.1722	49.2951	184.17	36.2347	138.265
C1orf77	8.57345	8.39931	0.993457	1.0143	1.03497	0.98841	0.946159	1.00814	1.00634	0.927517	0.964406	0.966483	1.03928	0.993418	0.936731	0.989191	1.01764	1.03168	0.972998	0.989556	0.995884	1.09362	1.00508	0.995965	72.4849	9.05139	81.4552	56.8331	75.1219	51.4453	134.753	54.4814	77.1908	72.0849	136.868	44.6658	58.8593	49.5168	44.7995	49.9505	79.2114	73.9847	80.2162	54.8134	86.759	69.9778	106.285	41.3478	88.5028
FST	7.10138	6.78167	1.16212	1.13841	1.01198	1.22267	1.07302	1.47418	1.09609	0.869655	1.39305	1.12288	0.897858	1.22597	1.01024	1.0929	0.977585	1.12525	1.28349	1.28353	1.37841	0.670807	1.1697	1.12761	103.358	2.06928	143.217	7.75288	35.5523	1.99878	15.6457	8.02879	251.392	24.2415	38.9094	12.4392	42.5303	3.59825	3.3079	13.5533	156.767	6.58075	498.039	4.9258	271.622	3.50541	31.6068	1.51331	65.9042
SDCBP2	6.25658	6.50901	0.892915	0.933255	0.821998	0.986099	1.43176	1.03351	1.05225	0.696511	1.05426	0.860656	1.00761	1.04006	1.09142	1.06439	1.03582	1.04725	0.784903	0.944725	0.960928	1.05785	1.15086	0.997573	15.9706	2.5522	74.2798	108.341	54.1088	150.903	73.5962	63.5243	29.8663	33.9285	77.3768	3.6624	55.5142	121.648	84.706	61.7595	79.4578	109.633	54.679	56.5225	16.1697	98.8906	49.4211	119.359	22.2889
KLC1	7.55517	7.5962	1.03463	0.937884	0.962028	0.949518	0.927623	1.06267	1.04985	0.948908	0.991151	0.894215	1.01822	1.01325	1.00897	1.00965	0.966806	0.964713	0.864121	0.978684	1.00369	0.988767	1.05569	0.982432	89.1215	14.8611	87.9971	47.7643	37.3396	49.0364	67.158	69.9146	50.1124	60.2231	65.929	45.6081	63.4947	62.5809	41.268	49.6678	58.1116	41.0861	95.9418	53.8668	103.775	50.4184	99.1405	49.4992	56.2781
PSMG3	6.52709	6.72489	0.973127	1.02335	0.956259	1.04936	1.10636	1.09287	1.06091	1.30666	1.12806	1.15718	0.849262	1.04021	1.07619	1.02278	1.07911	1.1556	0.951869	1.07925	1.00522	0.789043	0.891068	1.0378	69.9754	9.07809	66.8196	48.1591	118.211	36.8071	120.69	41.6985	70.7707	52.8338	70.6995	17.4007	46.506	36.37	38.568	37.7562	83.4149	42.34	55.9038	44.2914	87.758	62.9215	120.555	46.161	107.788
C6orf62	8.29566	8.35909	1.01226	1.05632	1.00778	0.936052	1.10177	0.977795	1.05106	1.03474	0.999032	1.04009	0.93833	1.05994	1.07506	1.0248	0.942849	1.11934	1.12517	1.09443	1.00263	1.02987	1.09254	1.03437	59.7705	14.0018	57.3651	43.4583	45.6323	37.4608	86.4193	41.4215	112.535	80.0118	112.244	28.6759	77.2094	54.7179	66.4981	78.011	79.4275	44.5763	98.0678	60.6031	27.5343	70.1062	76.3598	36.8641	43.1614
PPIC	8.20899	8.61566	0.947012	0.950022	1.00609	0.996372	1.04954	1.0588	1.14739	1.00279	0.942372	0.928052	0.719447	0.994151	1.07435	1.04899	0.878903	0.889947	1.11257	1.12985	0.968744	0.982062	0.938088	0.988835	73.2012	14.1805	95.407	50.9983	96.8038	59.3474	127.137	60.416	94.8369	64.35	81.8326	23.7856	90.7081	43.8115	66.603	50.2163	50.2124	77.7981	37.1712	46.9302	82.749	87.8847	203.695	78.8269	78.2403
LMNB2	6.15911	6.20748	1.00599	1.11473	0.968158	1.16757	1.17602	1.1044	1.04794	1.08229	1.02165	1.10999	1.36748	1.1545	1.09759	1.03038	0.86385	1.11609	1.08252	1.25893	1.05603	1.02594	0.940117	1.08534	68.8809	2.45125	60.5032	31.0815	62.6689	45.1835	77.3944	44.6175	82.7388	37.9804	150.879	7.6142	54.9189	33.9952	40.1131	47.3295	89.8776	42.7429	195.89	33.4503	168.528	83.3742	59.5439	27.7708	90.9778
SNHG8	7.62298	6.97355	0.945757	0.917394	0.983902	0.959432	0.967114	0.921397	0.914806	1.0217	0.913406	0.956744	0.821738	0.896833	0.950967	0.983215	0.962989	1.01083	0.99408	0.940452	0.992671	0.98487	0.908214	0.949929	40.7959	30.2674	59.5426	63.7745	53.0819	48.0501	61.5869	42.2864	51.0299	134.291	69.8423	36.3811	29.8984	46.9527	42.4884	59.1684	34.7556	65.3105	32.7398	45.8156	87.8999	69.7264	54.1014	46.7715	221.809
ASAH1	6.29063	6.40418	1.02897	0.995723	0.985987	0.969203	1.03499	0.934668	1.02244	1.02571	1.07629	0.949089	1.44489	1.03403	1.03488	1.01976	0.859879	1.04113	0.982522	1.0622	0.953743	1.31485	0.985882	1.03604	66.1613	30.5433	84.3775	76.7941	36.2575	86.2855	28.1864	85.9069	86.1457	77.1757	104.35	53.7233	60.6539	79.9207	87.7344	89.266	43.3521	40.2237	31.6444	50.4328	32.4532	83.2449	83.6985	52.4808	50.1213
CARHSP1	8.22872	8.77381	0.93957	0.980527	0.898932	0.95553	1.06624	1.05892	1.12023	1.00501	0.941101	1.03467	0.79667	1.10242	1.08911	1.07839	0.973454	0.994918	1.0562	1.04849	0.965854	0.967811	1.01642	1.00431	66.6001	3.96829	40.6844	45.6349	28.1006	99.9531	110.476	52.7883	66.9878	38.8772	82.3381	12.9542	78.4295	77.7237	97.2657	82.6527	64.9281	88.4259	84.0621	41.3373	72.716	56.7891	46.3455	71.1383	18.6679
C6orf106	6.74822	6.82856	1.05785	1.049	1.01191	1.00632	0.949286	1.0675	1.04428	0.99305	0.947734	0.995515	1.03025	1.03764	0.932725	1.04292	0.971528	1.00456	0.915133	0.994648	1.04004	1.02133	1.03454	1.00704	85.7612	13.7928	82.5427	63.117	70.5201	38.003	88.9678	43.0149	69.5953	72.266	81.2108	68.2922	75.0768	36.0477	36.8654	57.8269	150.588	54.9797	102.124	58.5733	38.3376	36.882	75.893	24.4935	74.8188
ISOC2	8.07656	7.81741	0.953957	1.02036	1.04825	0.987563	0.875808	1.07322	0.962448	1.05068	1.00987	1.04791	0.807308	1.01572	0.94449	0.992265	0.97185	0.93638	1.00883	0.967382	0.990792	1.06471	0.863471	0.980632	56.4388	21.1288	69.0646	82.1918	71.5855	68.9745	95.1654	48.4147	57.1793	77.1482	67.5301	48.0932	48.8484	40.6894	31.9727	45.5986	79.8954	58.1285	50.2505	44.045	66.06	51.7502	77.8824	44.6113	109.629
RNPEPL1	6.07653	6.01601	0.996929	1.0131	1.00022	0.971919	1.04879	1.02562	1.02056	1.04845	0.861652	1.04697	0.994619	0.99944	0.992853	0.993279	0.979653	1.06198	0.95293	0.991474	1.0027	1.06133	0.945727	1.00049	50.2346	18.8443	65.426	74.4404	79.3355	90.4948	83.9488	69.9083	49.3312	53.8018	86.8181	51.7781	66.9646	47.0025	47.6311	41.4812	99.5004	54.7245	71.7075	50.2153	68.5387	79.383	58.3504	40.817	85.5404
UCHL3	8.13922	8.39223	0.949664	0.990494	0.900934	0.895983	1.12626	0.970691	1.05845	0.991616	1.0728	0.938825	0.914698	1.0059	1.04469	1.05184	1.0101	1.00299	0.997871	0.983575	1.09258	1.00042	1.07155	1.00343	103.077	9.84461	88.0694	34.4956	62.9029	54.4327	71.4573	62.2901	81.5932	82.9201	78.8029	24.8007	43.9106	66.7697	69.0582	71.6084	73.1745	60.5681	71.3903	73.5956	57.7909	80.2581	83.5072	79.8398	60.8858
NUCKS1	10.1911	9.6637	0.942766	0.98351	0.985199	1.03977	0.959178	1.03193	0.947352	0.987195	0.92574	0.976572	0.839873	0.971546	0.975555	0.992661	0.98073	0.999861	0.967182	0.971485	0.98695	1.00887	0.942975	0.972233	77.2641	16.4754	89.6148	36.9441	94.2217	27.2629	195.19	40.469	71.8284	83.9222	147.215	46.6289	51.7017	38.9275	34.9006	51.5929	115.101	26.7143	81.2594	42.7191	73.9428	52.0229	112.018	22.3637	85.2704
REXO2	10.0017	10.0604	0.997103	0.953854	0.971923	0.937314	1.01481	0.98576	1.08884	1.06226	0.971621	1.01617	0.862207	1.05129	1.08712	1.03457	0.969267	0.989502	1.03395	1.04483	1.04819	0.994442	1.01694	1.00628	50.124	29.9165	71.0591	42.1416	43.0477	62.6498	26.8687	64.4745	100.377	91.1024	64.0372	26.4753	62.9655	62.2402	62.9807	49.8625	62.4639	50.8806	49.6541	54.7218	152.126	78.2446	35.9498	60.0424	82.1216
SEC24C	8.41811	7.70721	0.982874	1.0106	0.980218	0.865234	1.05868	1.0849	0.970306	0.989246	1.02906	1.09931	1.04122	1.01745	1.01904	0.993156	1.04944	1.05063	1.117	0.982285	0.98592	0.990184	0.830901	1.00703	58.5486	13.0748	64.5348	66.7212	51.5142	90.0856	68.11	71.5745	70.6055	63.036	75.9756	25.4081	70.885	91.1032	72.5392	71.5146	75.7276	67.4815	70.5396	64.0024	120.719	92.2486	47.8864	47.7843	45.9356
COX7A1	7.73161	7.37778	1.10845	0.719992	0.995909	0.718186	0.566243	0.987169	0.821548	0.90292	0.827387	0.773203	0.659961	0.791254	0.744015	1.04465	1.01244	0.945369	0.873973	0.737957	0.835208	0.929133	0.829857	0.848801	6.18477	12.1593	36.0638	20.3601	7.82729	5.83857	3.44267	61.5183	1.62324	16.4447	11.3117	543.109	9.10047	30.6644	0.648485	7.25233	12.9251	98.1748	24.5062	145.507	1.48909	7.38442	45.0979	13.6767	6.61296
PRCP	9.9475	9.79648	0.94838	1.02431	1.08784	0.994061	0.984818	0.999132	0.988103	1.01308	0.915394	0.994446	0.814449	0.964168	0.999722	1.01992	0.935937	0.961124	1.06789	1.04328	0.9818	0.991005	0.934721	0.98398	86.452	43.9398	101.639	43.2057	27.4082	65.9648	17.8729	69.7788	38.4109	135.39	82.6409	47.744	77.2605	52.7484	61.274	73.306	17.3337	71.7558	54.0256	45.3994	99.9584	93.2952	48.2174	41.9996	59.0561
PXN	5.98796	5.91721	1.11417	0.996921	1.07291	1.00949	0.963648	1.15685	1.02183	1.03623	0.988867	1.01081	0.988111	1.0017	1.01384	1.00574	0.974935	1.03723	0.93713	1.04204	0.995611	0.983258	0.965422	1.01508	57.4137	8.88543	93.0959	70.4919	29.0907	17.3002	58.1968	18.8227	120.238	46.9191	74.8188	33.4595	60.1319	12.3315	10.4404	30.058	216.737	18.3544	275.296	15.87	139.486	25.8208	177.278	15.5735	37.4505
KIAA0114	8.30503	7.23328	0.999221	0.848013	0.912801	0.984354	0.905454	0.97085	0.862613	0.991204	1.06953	1.0022	0.827678	0.965883	0.900939	0.973359	1.00084	1.00457	0.898208	0.982463	0.931221	0.805505	0.854134	0.937669	99.7699	34.8867	38.3834	54.2197	83.2676	64.1246	85.4211	76.0198	7.77508	62.3169	49.7544	45.0298	16.2881	60.2794	17.4575	30.7601	36.5751	86.6383	40.3147	93.8679	118.051	81.363	35.2002	50.208	160.243
LY6G6C	6.23857	6.34271	0.804097	0.826415	0.646703	0.82495	1.12809	0.925987	0.744277	0.839187	1.0011	0.920044	1.2791	1.0488	0.956892	1.03302	0.656507	0.781042	0.925434	1.01528	0.922271	0.649124	0.968849	0.899865	70.356	0.0553909	77.6216	1.95353	7.03214	31.3829	3.21644	46.217	10.061	261.52	0.780302	0.100459	30.4273	198.941	90.909	30.9452	197.369	5.48166	2.76129	400.317	6.58276	22.1314	1.4464	100.255	7.07348
TMEM50A	6.85257	6.9108	1.0632	1.09478	0.998191	1.08991	1.15822	0.989772	1.07777	1.38687	0.83086	1.21033	1.36968	1.05387	1.04964	0.999984	1.10166	1.09631	1.11425	1.18124	1.02828	0.917578	0.864956	1.07987	50.7062	36.0601	100.575	67.2586	44.3047	46.9109	67.0501	53.1926	89.0409	83.0294	135.41	34.6896	83.7154	52.0933	58.7488	67.2293	95.9367	55.1667	66.4029	50.4657	70.6949	55.3717	61.122	35.1011	45.7029
CFB	7.13744	7.46448	0.935625	1.38364	1.18917	1.15682	1.23606	1.10587	1.11679	1.04789	1.12851	1.05897	0.745323	0.913646	1.0039	1.10812	0.99102	1.06703	0.999934	1.12965	1.11616	1.28059	1.12398	1.08756	11.9687	5.39761	72.0605	379.149	5.46606	23.0447	41.8917	25.2543	83.1381	73.5539	119.819	21.4281	125.499	12.7181	43.3632	105.125	44.9552	172.31	71.4574	16.5856	38.5735	17.4582	166.771	6.09975	1.97301
SLC25A11	7.39387	7.28293	0.986515	0.946496	1.03797	0.897253	0.799265	1.04808	0.91487	1.05944	0.955658	1.02952	1.15648	0.960163	0.852052	0.990903	1.0249	0.999312	0.96425	0.828032	0.967543	0.988136	0.688997	0.956944	88.3197	16.8126	53.5919	50.0452	56.9267	44.2103	95.6852	43.0887	50.9399	94.0422	71.8908	187.882	54.6897	42.8371	45.5033	43.0696	59.3355	57.5461	61.629	64.8906	79.9546	55.425	42.9903	37.8641	116.52
DAZAP1	6.22383	6.19216	0.982451	0.983689	0.935792	1.02198	1.03114	1.05534	0.961016	1.00582	1.08863	1.00011	0.913776	1.03058	1.01577	1.00582	1.01247	1.14729	1.05489	0.992198	1.01066	1.09536	0.913803	1.01231	92.408	11.6096	71.9127	53.2058	66.8043	52.2852	81.6237	68.4293	87.0451	71.2525	105.654	20.0357	68.2397	49.9637	51.2832	52.9525	73.6191	56.5038	120.718	38.4796	90.8872	70.5492	68.0383	39.2398	115.29
TMEM208	7.11723	7.43542	1.07777	1.0441	0.967774	1.073	1.14286	1.06409	1.02465	1.24278	1.15485	1.06827	0.995149	1.0311	1.1165	1.00304	1.01545	1.08543	1.13132	1.15968	1.03732	1.1314	1.09956	1.07934	76.9268	21.6802	103.573	60.1454	77.2774	39.4386	94.6441	52.139	67.3409	63.1302	83.0903	26.2694	78.1865	33.209	47.177	50.8618	112.051	51.6291	55.8726	38.204	73.0685	51.1313	70.0836	44.481	84.7825
GSTM1	8.19126	7.0652	0.931009	0.941934	1.12953	0.918623	1.07516	0.95249	0.798944	0.89541	0.949524	0.997534	0.76187	1.07741	0.828369	1.04964	1.00171	1.03953	0.837902	0.837465	0.932421	0.985205	0.891395	0.944432	3.1627	0.0575955	55.5161	21.3635	0.0492422	0.153647	0.190173	0.388048	0.490049	0.593135	53.5456	39.0474	0.06103	0.0944069	481.563	84.1929	0.0327313	0.079929	0.0476754	0.389185	88.8623	43.4932	0.0665306	0.0220552	0.333473
SCO2	7.31435	7.83103	0.903996	1.21027	0.98019	1.03157	1.37031	1.14593	1.03282	1.02622	0.982091	1.04529	1.10277	1.09722	1.04392	1.10552	1.02009	1.07816	0.954777	1.05877	1.01715	1.08931	1.15012	1.06888	66.2703	6.74702	103.512	46.4459	54.8393	55.6184	312.876	51.9545	166.369	62.8478	80.8358	19.2981	116.089	47.4126	44.6346	58.6258	94.5495	67.3853	70.0721	48.7918	69.943	52.857	57.5744	44.0164	45.4957
CALD1	8.38838	7.90087	1.06936	1.03345	1.11816	1.19896	0.860601	1.13567	1.09718	1.00275	0.970688	0.926867	0.702424	1.03	1.03414	0.993749	0.960257	0.998955	0.972153	1.01557	1.02644	1.01404	0.983142	1.00688	68.2404	15.2794	310.104	7.37119	75.3259	10.6609	24.0204	32.17	105.426	131.966	116.375	48.087	136.823	25.7145	17.2484	72.9243	75.7916	15.15	160.911	30.3667	48.6459	28.5134	37.8495	35.8513	37.5517
ANAPC5	9.15497	8.21432	0.989387	1.03889	1.0346	0.979264	0.954445	0.960505	1.00398	0.939321	1.18821	1.00611	1.03215	1.03493	0.997386	1.00876	1.01858	0.975228	0.999148	0.942477	1.0186	1.0396	0.849719	1.00054	88.7027	28.4626	66.0444	55.3744	46.6844	48.6439	102.001	57.5151	65.0216	72.3558	110.134	42.7092	56.9122	49.482	36.6178	54.8013	72.2432	44.4678	99.8861	49.6143	79.1668	58.2198	80.187	48.0846	97.416
FTHL3	8.7647	8.61767	1.07233	0.940515	1.08572	1.23837	0.947837	1.06219	0.983225	1.042	0.999129	0.932696	1.04478	1.14517	0.974746	1.0465	0.944884	1.13638	1.05291	1.03315	1.0004	1.00714	1.2017	1.04246	171.164	12.4761	114.15	76.1564	147.231	20.4599	45.346	33.9513	49.0267	73.1826	63.9034	46.0683	66.7443	21.7395	20.5503	26.689	153.694	21.6904	115.909	18.7106	107.74	20.4623	160.234	12.7828	108.733
TUBB3	6.27036	7.49755	1.26932	1.25063	1.07528	1.18154	1.29202	1.44926	1.56076	1.83386	1.10202	1.41086	0.922906	1.25031	1.65496	0.917449	1.00019	1.11253	1.50286	1.85421	1.15589	1.03866	1.1482	1.28494	34.0316	0.749586	79.0774	16.1384	76.4319	18.9275	105.244	15.5095	111.667	26.4721	26.9806	1.99278	96.0586	9.96909	28.9401	35.0896	78.6677	16.1011	117.346	32.278	110.91	45.6194	227.152	153.505	98.5687
PPAP2C	6.29284	6.29058	0.999157	1.00237	0.945796	1.11332	1.18289	1.10641	0.985	1.03906	1.28667	1.1681	0.801446	1.03662	1.10319	0.998856	1.12432	1.15818	0.973994	1.22611	0.952356	1.09774	0.975698	1.06082	71.1865	41.5299	69.8394	177.31	187.401	49.3457	35.64	28.2567	66.3018	42.0426	128.387	39.4446	42.5876	11.4605	35.894	46.7934	62.4015	22.8926	65.3251	10.7814	109.459	31.9496	74.6741	17.9938	107.657
CAPRIN1	7.21769	7.10566	1.03841	1.00694	1.02851	1.0636	1.03927	0.984479	1.05385	1.00671	0.956541	1.02084	1.04104	0.978833	0.984791	1.02219	0.972921	1.02655	1.01783	0.993952	1.02884	1.01678	0.845653	1.00612	50.8033	14.6656	93.5149	69.1226	90.069	53.1456	42.2876	43.4325	139.657	74.168	141.543	31.3191	81.9788	53.2108	54.1895	68.6157	85.7325	47.8127	117.584	48.4418	92.7961	92.2068	103.229	41.4684	106.429
SCNN1A	6.49619	7.19502	0.74435	0.906198	0.705716	0.869946	1.60155	0.834739	0.850963	0.844379	0.808007	0.982665	0.765118	0.738461	0.802566	0.943639	1.02659	0.991173	0.87369	0.801919	0.902475	0.908816	0.75795	0.888615	16.0039	29.0365	33.5889	184.477	61.7949	162.333	9.19674	88.9651	16.6434	35.5965	76.6306	30.5827	28.3426	81.702	101.473	73.4606	65.2033	90.9607	6.2427	69.857	31.4167	101.172	11.4494	51.6921	49.911
PTDSS1	8.81674	8.6601	1.03489	1.02195	1.0067	1.09296	1.02028	0.996137	1.02241	1.01454	1.10914	0.956338	0.920822	0.999476	0.920916	1.08288	0.949896	1.02221	1.13477	1.00597	1.08651	0.827073	0.925811	1.00722	77.5175	11.1052	112.607	36.739	155.958	35.5127	86.6213	31.3543	83.8456	57.7972	68.7629	29.397	71.7389	30.3385	40.5838	36.6507	68.4883	29.9511	71.5587	35.5024	103.769	47.4283	60.5962	31.0808	230.227
TOB1	9.08842	8.52966	0.974758	0.899462	0.909481	0.911386	1.04481	0.938519	0.985318	0.976421	0.966911	1.02081	0.832322	0.976553	0.881101	0.973858	0.977434	0.958973	1.05968	0.961468	0.996759	1.01432	0.964757	0.9631	68.7999	30.1127	41.0181	87.4491	68.8794	96.1045	24.5814	92.1883	48.9673	199.41	142.266	75.112	45.4977	64.1361	79.9689	74.4505	78.337	56.0081	39.0083	65.8935	57.521	54.8249	44.6013	64.8363	71.6023
CA2	7.09564	7.54764	1.28892	1.3241	0.880246	0.952245	1.05499	1.12354	1.09142	1.51559	1.51674	1.25547	0.908607	1.06281	1.12829	1.12362	0.964778	1.09702	1.25413	1.35318	1.15214	1.05116	1.37017	1.1652	42.8645	24.1978	96.4363	10.8702	44.6667	46.7098	63.1683	16.6146	313.491	95.5007	17.0803	17.3545	49.2697	7.26249	28.9159	62.0391	2.49449	13.7022	79.4419	27.1076	62.1191	112.307	241.758	15.9452	8.49752
HSPA4	7.67667	8.06348	0.93225	0.978949	0.965807	0.9761	1.16294	1.16585	0.981262	1.04636	0.982056	1.09156	0.966639	0.999775	1.07083	0.997683	1.00585	1.00821	1.01237	1.04253	0.950409	1.00866	0.880864	1.01081	69.5242	9.47977	61.9791	54.7592	93.1687	71.7817	79.7546	69.2409	85.1404	64.2056	107.894	28.2256	61.7127	80.5953	61.9338	67.8796	49.8434	57.4022	52.0558	51.4646	57.0531	102.953	113.968	59.2711	102.817
PABPN1	6.4269	6.79264	1.06233	1.03159	0.988807	1.01461	1.0475	1.05239	0.954463	1.05265	0.993373	1.11281	0.986387	1.07268	1.07501	0.938142	1.12578	1.35046	0.916041	1.02242	0.993394	1.05691	0.886312	1.03495	82.8335	10.9285	94.4109	56.8995	42.8061	38.8601	86.92	58.2816	81.0209	71.7911	95.9937	21.0533	53.9971	40.0242	38.1752	49.6034	103.742	72.7858	90.1297	48.2799	98.5212	67.3155	83.5672	25.5124	134.231
SMARCD2	7.46471	6.98075	0.841949	0.914887	0.985859	1.06741	1.05503	1.09561	0.932235	0.930415	0.937261	0.973545	0.923813	0.999051	1.04574	1.00139	0.795118	1.05783	1.03249	1.09681	0.983333	0.92779	0.889582	0.975578	95.4472	25.8237	54.5313	74.2082	58.9885	62.2527	97.9655	52.663	74.9832	101.844	95.2658	22.7669	65.4056	50.0442	60.2291	58.0963	113.471	82.8401	61.0854	66.0653	89.9971	73.6144	45.9466	33.7314	128.141
CD276	6.46646	6.96976	1.09194	1.02911	1.10048	1.24428	1.06762	1.24806	1.10844	1.17866	1.14313	1.04928	0.872062	1.17685	1.1415	1.0595	1.00233	1.0224	1.21024	1.2048	1.19989	1.16952	1.06474	1.11356	125.208	7.23611	163.837	18.7728	116.456	9.65542	98.5701	24.7703	135.046	44.9448	81.5062	17.9013	91.0954	7.682	14.0647	24.9704	146.816	12.9472	167.465	9.81645	68.3195	14.7064	187.741	10.2216	59.135
SRPRB	5.8642	6.13635	1.0315	1.03763	0.975735	1.06516	1.15036	1.07814	1.0605	1.49741	1.12495	1.20787	0.865049	1.04248	1.04207	0.959646	1.09688	1.01894	1.08471	1.15493	0.958113	0.953812	0.880208	1.06124	74.8693	30.9275	54.2247	52.206	79.625	59.4112	99.2486	48.8774	59.1858	67.6209	94.3055	21.312	50.2192	55.4823	60.9188	58.387	75.6334	69.9622	51.639	33.9197	133.242	71.6944	92.2305	55.7686	101.799
MRPS33	8.09485	7.70245	1.00724	0.964687	0.990468	0.946402	0.932228	0.915517	0.935497	0.95186	1.03965	0.896451	0.966406	0.974542	0.975583	1.00987	1.03171	1.05796	0.899182	0.945572	1.01066	1.0594	0.990839	0.976273	47.5508	22.1893	59.6327	69.6433	40.0382	42.7052	56.7982	51.0394	92.6407	88.0114	85.2223	66.068	30.9196	40.8254	45.5672	47.4172	66.6142	63.0793	46.7636	65.6559	53.8252	60.4049	31.6929	55.358	147.631
IDH1	7.66493	7.36038	1.03597	1.03781	0.973262	0.997727	1.18849	0.861152	1.04864	1.0277	1.10103	0.910008	0.866109	0.987137	1.05596	1.03987	1.0148	1.03137	1.05164	1.0659	0.934582	1.06488	0.983693	1.01323	100.886	12.5602	54.554	48.9428	299.531	72.8779	44.3941	53.6556	118.806	131.475	92.304	22.4675	40.6388	43.6171	98.8336	75.0072	74.3188	52.3952	44.4481	36.8795	65.0196	91.9401	90.9876	22.3586	132.733
LOC653566	7.87189	8.63154	1.09622	1.05168	0.983235	1.03775	1.1848	0.924889	1.08121	0.812203	1.03605	0.93399	1.07889	0.990716	1.09901	1.02435	1.03259	1.1501	0.82062	1.06838	1.0538	1.09918	1.04673	1.02888	89.9534	29.4845	77.7998	48.8808	38.5774	41.2839	34.2606	39.0618	63.4284	68.9728	76.9648	29.811	58.9585	50.2067	42.3256	53.4301	116.643	56.5547	92.9071	43.6158	154.449	60.5293	75.1979	33.2923	61.5464
AP2A1	6.60456	6.92518	1.06999	0.979382	1.01805	0.969658	1.015	1.06113	1.0001	1.00639	1.03771	0.993201	1.0573	1.0295	0.993317	1.0414	1.08449	1.11544	0.98028	0.974511	1.05048	0.945549	0.839412	1.01249	61.2542	9.52801	87.8369	67.253	83.31	59.4329	98.0005	56.708	90.6595	73.1601	85.8632	47.9563	94.8344	42.5566	46.7444	50.9795	78.3156	57.3967	80.1786	51.7969	67.2438	63.0147	87.7506	44.8216	60.9054
CST5	5.86392	5.89832	0.996091	1.01023	1.00636	0.997846	1.01402	1.01503	1.00659	0.980079	1.08738	0.968747	1.03882	1.0062	1.01956	1.00314	1.0342	0.911651	0.90025	1.00502	1.01368	1.4379	1.18319	1.03028	0	4813.92	0.0385703	1.80046	0.0435151	0.171727	0	0	0	1.79946	0.120618	0.999873	0	0.381833	0	0.0802485	0.0579966	0.0471283	0	0.0628225	0	0	0	0.198938	0
IRF2BP2	8.20393	7.63423	0.956599	0.988007	1.01161	1.0428	0.953905	0.900261	0.973168	0.928247	0.950332	0.951417	0.967843	0.970162	0.95552	1.01945	1.0081	1.01873	0.980835	0.979005	1.03417	1.00204	0.897165	0.975684	92.7317	17.1914	85.5579	80.4771	98.7263	42.4715	112.975	66.9929	57.1313	101.009	139.911	39.7661	60.7974	57.9383	32.4403	44.0896	97.004	75.2185	67.9483	36.6897	64.5364	57.9764	81.222	43.753	78.5873
HTATIP2	7.58843	7.69136	1.01716	1.03357	0.894934	1.15464	1.17758	1.01707	1.1219	1.06572	1.26341	1.15968	1.00916	1.14035	1.14429	1.0629	0.951685	1.1055	0.997875	1.13022	1.00022	1.00307	0.9315	1.06583	89.2565	8.90816	96.8344	43.5256	116.334	31.6058	115.248	40.5461	89.3516	46.4577	61.0999	11.7356	58.7378	36.4254	70.0955	47.7037	99.2461	36.7373	75.2867	42.7072	148.831	45.5816	190.828	45.8245	98.1352
BRD2	9.76156	9.76933	0.966125	1.00296	1.01329	0.995029	1.02081	1.01798	0.993361	1.02509	0.894068	1.04155	0.843291	1.00721	1.00663	0.992403	0.946097	0.966732	1.06923	0.986113	1.01262	0.994844	0.909033	0.985927	79.6974	18.3333	100.795	65.6866	93.7234	39.1849	79.9087	49.8806	77.6619	78.2284	127.071	29.8819	72.7014	51.094	46.3755	63.0268	78.0684	63.3098	118.457	43.4001	43.8977	57.8479	103.554	41.1791	65.1767
FARSA	6.78531	6.92451	0.959755	0.995476	1.02562	1.02722	1.02855	1.16268	0.998399	1.04161	0.948386	1.0731	1.03068	1.03475	1.03642	1.02707	1.05982	0.970095	0.9786	1.00378	1.04928	1.0019	1.07453	1.02513	121.238	12.775	74.4044	70.3605	71.8208	53.138	104.68	52.6083	81.6906	64.5973	89.2471	33.1636	53.5378	41.1832	51.4275	45.9391	60.9742	55.92	76.6495	48.014	137.388	89.9292	87.5989	60.1942	120.981
PES1	6.97589	7.07886	0.981314	1.02159	0.996033	1.04999	1.1049	1.1416	1.06311	1.32824	1.12117	1.03878	0.882603	1.04021	1.02388	1.00009	1.04117	1.11642	0.921586	1.07349	1.00537	0.777427	0.890854	1.02952	71.4901	8.38426	63.6561	48.4479	68.8165	43.0506	97.8944	46.7305	82.6826	57.2974	75.9069	22.494	58.1339	37.6368	39.0025	41.9826	78.0392	49.3876	82.8757	38.019	117.265	74.2442	101.686	49.1846	71.5533
COL4A1	8.83388	8.22601	1.14344	1.28062	1.273	1.37319	1.15344	1.32239	1.26543	1.14746	0.90354	1.20771	0.891466	1.12064	1.1207	1.06306	0.894226	1.23951	1.33443	1.11714	1.12949	1.02826	0.676253	1.12788	96.5565	2.46205	335.521	2.3242	149.328	5.95157	75.0055	17.7207	27.3236	43.232	144.387	22.9738	110.788	2.25625	12.9757	27.1267	87.6146	6.58601	159.511	8.12514	107.287	12.6175	164.712	7.40118	150.924
TAX1BP1	9.69207	9.4371	0.956141	0.93936	0.96791	0.91535	1.05934	0.944502	1.05334	0.989175	0.984355	1.01892	0.857128	0.980745	1.01135	1.04913	0.97975	0.992835	1.07614	1.05199	1.00525	0.975377	0.981009	0.989957	58.6706	26.2762	56.7464	94.8335	62.2494	65.6042	59.1539	46.3204	55.2576	75.2867	127.936	45.7673	52.8968	78.0645	49.2375	58.0846	60.0867	40.7435	59.4133	49.8179	66.3129	69.9678	72.1047	37.5522	110.75
PLA2G2A	6.02258	5.95027	1.04954	0.828257	1.24409	0.820916	0.724294	0.78294	0.90023	0.866708	0.519571	0.791264	0.732319	0.702304	0.671133	0.81828	0.774391	0.928212	0.837665	0.604228	0.849888	0.92653	0.939967	0.824415	0.353192	2.40581	213.706	15.568	88.5553	202.262	0.36278	837.777	1.69008	430.26	45.4745	75.1825	34.6316	11.7062	0.44994	17.1417	9.68526	52.732	52.5977	64.389	0.69033	145.341	6.80087	17.8723	13.6758
SSR3	6.18868	6.62527	1.15144	1.07033	1.02231	1.07779	1.03944	1.01961	1.06096	1.46175	1.1417	1.05805	0.84676	1.03158	1.06397	1.0152	0.974019	1.16914	1.1385	1.21728	0.998507	0.743808	0.864974	1.05558	64.1312	61.4342	94.4653	36.7034	84.6954	37.2047	71.2827	32.4198	62.6436	63.9972	86.8901	37.575	62.2127	44.4215	31.7776	56.0651	93.2732	39.817	76.0645	39.041	118.756	61.4676	75.6871	37.8169	99.3343
DECR1	9.87072	9.70442	0.969712	0.968617	0.963407	0.883833	0.909255	1.05946	1.02014	1.00612	0.986741	0.95863	1.02916	0.965436	0.947894	1.0152	0.996273	1.01819	0.909964	0.942815	0.971795	1.04147	0.933588	0.976081	37.6446	22.5003	86.0919	58.9355	73.4942	63.987	124.007	51.9567	88.4018	102.116	126.624	101.685	79.0105	65.7938	41.4783	42.8851	19.4041	66.5874	42.3593	68.8351	49.8749	60.4282	69.4951	41.6856	49.7603
SPARCL1	10.2038	7.59878	0.978526	0.910043	1.0627	0.941764	0.75048	0.877268	0.89931	0.948533	0.893598	0.782948	0.575581	0.867069	0.901743	0.995696	0.915857	0.90169	0.981389	0.881073	0.911881	1.00388	0.859868	0.897186	20.4989	35.7738	197.248	34.122	25.3332	22.5848	16.4303	75.1281	9.25968	147.73	123.353	337.212	73.5362	48.997	7.95295	98.4103	29.4067	53.4602	78.2344	98.7335	16.783	35.5246	38.7728	24.8007	55.8581
ZNF750	6.32671	7.63749	0.724069	0.845599	0.695717	0.911738	1.46373	0.998858	0.902583	0.880097	0.947306	1.02696	0.702503	1.10581	1.07071	0.977493	1.10757	1.02912	0.748221	1.28507	0.93099	0.933556	0.998145	0.965992	51.8086	13.245	31.9331	36.0126	42.9957	133.72	97.0726	178.407	29.2046	133.574	56.6106	5.03544	70.081	119.139	93.363	91.1669	12.8575	109.718	12.1592	67.0003	31.7458	150.549	43.4002	112.149	65.3509
SSB	8.00104	8.1668	0.968516	1.05664	1.00938	1.05985	1.03334	0.967889	1.01142	0.945767	1.01721	0.946567	1.03265	1.01625	1.06802	1.01149	0.999816	1.0248	0.919928	1.05385	1.01886	1.02204	0.811268	0.999789	100.142	10.7438	77.888	84.4926	105.68	30.5448	75.3349	31.2571	102.085	74.2792	112.024	27.1174	48.4211	47.2528	34.6846	54.2285	94.8678	38.2709	71.9649	43.8828	118.667	66.4988	65.678	38.6697	176.926
C15orf48	6.30103	6.71037	1.10121	0.816235	0.696375	0.82732	1.55226	0.769774	0.884677	0.947244	1.08874	0.866392	1.31095	0.89378	1.01761	1.00711	1.04068	0.881994	0.87181	1.02905	0.909737	0.99057	1.10198	0.981215	64.4834	0.630424	26.1444	209.172	8.037	170.996	32.788	58.1322	42.5886	69.354	112.615	1.45981	101.618	278.977	7.81085	23.5186	29.762	73.9687	100.897	65.5642	9.05685	97.4292	30.8964	60.081	13.8711
POLDIP2	5.9978	6.78538	0.952519	0.990873	1.04118	0.987888	0.919172	0.984987	1.00784	1.31646	1.11601	1.0932	0.927909	0.980755	0.891446	1.03478	0.898014	0.913795	1.03108	0.901047	1.00302	1.17189	0.824934	0.999467	74.5758	19.4536	61.4915	44.9387	64.8381	56.745	122.694	55.7326	55.9749	69.9037	72.0157	65.1113	52.7005	49.5455	48.103	51.5784	73.7907	58.4243	62.6568	65.2851	92.5449	69.7131	67.4346	51.0138	123.286
C21orf33	8.2119	7.93653	0.985843	0.897369	1.05172	0.854515	0.812407	0.98033	0.893586	0.939404	0.968119	0.925861	1.00455	0.895533	0.83587	0.992033	1.02202	0.9745	0.889825	0.864037	0.96181	1.0258	0.969221	0.940207	62.2997	26.3818	37.9257	56.6713	59.4767	61.5683	57.3479	58.0619	36.9489	61.9971	71.951	205.516	53.3127	52.1237	45.0878	44.225	34.1686	65.7233	32.6048	76.3478	110.639	71.6016	43.4801	38.384	80.3508
PDCD4	9.44954	8.79603	0.967304	0.863555	0.916341	0.916514	1.00744	0.963126	0.880946	0.989895	0.900657	1.01747	0.859446	0.911922	1.09577	0.956269	1.00453	1.00131	1.00268	0.94125	0.918456	1.00915	1.01151	0.958835	42.662	62.4387	48.8837	57.6129	36.4308	92.11	35.8234	109.912	81.7873	162.537	87.1436	22.2767	56.1465	147.707	69.5346	60.2973	44.489	89.7222	37.3488	98.5798	18.073	113.747	17.9539	61.5666	62.1345
STT3A	8.35274	8.74876	1.00406	0.997505	1.04038	1.04908	1.0638	0.923348	1.02956	0.879538	1.11394	1.04565	0.976395	0.999781	1.1094	1.00641	1.01161	1.03124	1.08554	1.1733	1.04506	1.06248	0.848791	1.02366	63.5996	33.1128	72.8014	67.4534	52.686	45.7036	40.9536	38.2007	66.4356	59.9898	71.4736	30.337	73.7741	40.688	39.5288	56.5592	138.108	55.043	73.211	31.8553	285.561	77.8852	68.0755	26.1663	79.7178
RELA	6.60013	6.4777	1.07845	1.01926	1.0011	1.07339	1.04995	0.925074	0.994954	1.28703	0.97559	1.04328	1.24503	1.05084	1.01402	1.02047	0.957485	1.03475	1.06082	1.02926	1.03278	0.981511	0.859929	1.035	77.6304	14.5993	95.0018	85.5514	74.5095	57.6221	79.6949	50.529	50.8336	62.7345	146.8	32.0979	64.5842	54.0767	47.8917	51.8495	71.3701	53.3761	97.2578	42.2095	155.605	58.0209	82.5079	49.5115	65.8897
UBE2Z	7.00941	7.34953	0.975445	1.11047	1.00979	1.06314	1.08193	1.06071	1.02377	1.07293	1.01296	1.10944	1.08101	1.02808	1.05596	1.02816	0.958456	1.00698	1.06529	1.06274	1.05655	1.00032	1.01162	1.0417	101.907	13.9517	81.9947	65.7048	74.5791	36.9048	62.142	46.1202	103.082	63.5198	120.359	22.3712	106.497	42.3261	38.4096	49.7978	105.805	57.5671	99.1178	42.8171	118.398	57.9287	105.645	37.8909	106.501
TMEM189	7.53698	7.70022	1.1134	1.04344	0.959507	1.1188	1.12877	1.15027	1.0759	1.11684	1.05811	1.2053	0.975585	1.13813	1.12772	1.019	1.05157	1.06056	1.03422	1.05825	1.04474	0.955737	0.794396	1.05858	137.369	5.22956	125.01	62.7492	115.539	41.0164	163.576	33.592	69.1439	57.5049	89.6479	17.7687	60.0897	34.7838	42.2709	36.2246	212.93	44.6543	88.9728	30.5228	181.019	51.2392	94.0981	26.7086	114.423
MED15	6.26778	6.43405	1.07093	1.02306	1.02653	1.03201	1.06758	1.10045	1.03929	1.44381	1.09774	1.08011	1.28549	1.12396	1.07636	0.993926	1.12953	1.16575	0.989481	1.19391	1.08101	1.67176	1.00062	1.12825	107.449	8.07771	92.1443	72.0033	76.8862	41.397	300.236	35.2348	83.9541	48.9363	81.9588	24.3663	93.1297	28.5277	33.6874	43.6721	102.926	36.1589	112.923	28.4363	91.0807	51.6124	97.1687	25.5716	64.6941
CSNK1E	8.12646	8.32786	1.05155	0.980148	0.990386	1.06146	1.03574	1.15245	0.989422	1.00339	0.973505	1.04262	0.945423	1.03636	0.972217	0.984749	0.973842	1.03032	1.07663	0.991516	1.03793	0.984439	0.931117	1.01168	78.5305	10.3395	88.8397	87.4271	72.3866	28.5979	146.553	26.7482	63.1202	76.1896	120.736	26.1417	49.5431	35.9424	25.4251	42.3038	97.6908	39.2537	163.594	31.2565	91.905	34.5088	182.941	27.8559	68.3231
SOX15	7.81737	7.32159	0.975936	0.981163	0.79011	1.07717	1.28243	1.27098	1.11818	1.02059	1.01564	1.1226	0.925449	1.27819	1.17429	1.03749	1.04277	0.951863	1.08569	1.09781	1.05853	0.685528	1.10373	1.0522	109.088	1.64266	76.7525	60.4927	98.2548	74.9564	108.791	74.2817	93.8635	31.7538	39.7234	1.73643	54.3028	60.7771	52.4897	60.5609	172.619	66.6022	97.5853	32.3103	108.443	106.153	46.4805	79.0022	98.4474
TSG101	9.23069	8.48779	0.995572	0.931174	0.98029	0.949726	1.07209	0.89537	1.05465	0.970235	1.05321	0.921964	1.17902	1.01659	0.976653	1.02993	1.02044	0.966801	0.984182	1.02976	0.991343	0.966374	0.894457	0.994278	46.4814	20.1204	85.0171	72.8127	92.7103	71.2016	71.2461	57.8074	110.761	74.1231	106.399	50.8869	63.1751	72.5134	51.9505	54.0241	49.2941	54.1795	96.0807	65.82	87.5737	68.7631	92.3152	52.0941	58.5822
ATP6V1D	10.1093	7.71142	0.975484	0.945807	0.948467	0.924856	1.0575	1.00669	1.05434	1.04997	0.983452	1.03622	0.964861	1.01195	1.01719	1.02686	0.947341	0.942387	1.09792	1.00931	0.983315	0.666584	1.00901	0.983786	45.3302	11.4272	98.8201	56.9514	35.7251	80.6904	47.2769	63.1559	93.2141	59.9676	48.477	47.086	68.1787	93.367	64.8102	62.5296	87.2115	80.7737	78.1347	76.3047	73.2961	88.5118	63.9173	72.964	40.0489
PCMT1	10.0792	10.0507	1.00027	0.970788	1.05552	0.960134	0.878268	1.07597	0.99717	1.01471	0.893749	1.01888	0.767687	0.984939	0.984035	1.01068	0.918936	0.985176	1.10829	0.984423	0.991607	0.968276	0.882182	0.97389	57.6976	18.3618	89.2087	43.1028	83.6358	47.2485	74.2369	53.1935	88.1072	67.7659	99.0003	69.0979	61.0853	54.7569	39.0636	53.7526	94.8867	53.3928	107.778	63.7316	133.445	62.9194	115.254	49.9779	107.071
PSMD14	8.62355	9.14597	1.01902	1.0682	0.995201	1.06126	1.08105	0.992202	1.02745	1.04806	1.11384	1.01168	0.997017	1.02273	0.982356	1.07316	0.985186	0.98681	1.05529	1.0851	1.0271	0.994522	0.906273	1.02541	123.91	8.43458	67.5791	37.1033	98.5947	49.4973	93.2023	44.7879	78.5992	65.9639	106.645	30.4875	43.948	48.9289	49.6446	64.489	90.771	43.8996	69.0517	47.9701	111.181	57.7428	101.554	48.437	146.78
KRT36	5.90391	5.65068	0.828853	0.900289	0.631223	0.552812	1.05437	1.19421	1.05311	0.477774	0.705809	0.980412	0.961657	0.944465	1.04572	1.04102	0.490474	1.21195	0.829423	0.624655	0.596708	2.05627	0.723894	0.900243	0.203216	0.0328583	0.103228	0.351281	0.118276	0.0524704	0	0.0881323	0.0333891	10.9471	0.551255	0.0233422	0.0417494	646.304	0.0324204	0.0153341	0	70.4973	0.0651047	2868.99	0.0972132	0.117259	0	32.2439	0.0207159
MRPL36	9.25139	9.27393	1.00244	1.03668	0.984801	1.0635	1.02435	1.04978	1.03322	1.00897	1.09177	0.940307	1.0215	1.01304	1.06645	1.04203	1.00482	0.948427	0.972702	1.01427	1.02191	1.02955	1.01164	1.0182	109.134	15.1095	65.6275	49.4469	92.6829	38.7379	119.476	40.6324	58.2585	48.4535	53.2954	32.6436	41.233	41.1963	34.4441	34.49	162.127	48.3893	77.3129	41.916	112.115	59.9198	113.916	39.643	76.3769
PCOLCE	8.41548	7.91575	0.9119	0.968768	1.19137	1.10998	0.816881	1.07458	0.922829	0.962885	0.882031	0.942364	0.857078	0.94154	1.04041	1.03523	0.967819	1.01155	1.01654	0.943007	0.968504	1.03477	0.909556	0.976648	110.711	4.41466	265.893	9.80936	101.162	31.4677	44.9766	45.508	18.7151	179.957	68.9187	93.8376	222.29	8.34168	3.47635	37.6931	33.2528	7.69316	38.2803	23.6978	159.902	56.837	63.7644	17.9961	35.2137
NOP16	6.73094	6.69315	0.869803	1.02438	0.975037	1.00967	1.12179	1.04435	1.01349	0.936383	1.03904	1.03553	0.841567	1.034	1.09823	1.03462	1.0492	0.999604	0.95842	1.01165	1.01313	0.916404	0.887683	0.995903	34.616	4.33416	57.0537	39.9094	69.8426	59.6999	102.641	55.4884	111.915	67.9577	73.2556	19.9656	31.4342	68.1606	39.0095	46.4402	49.9614	89.1667	57.9584	57.178	80.4541	119.926	69.6508	88.4476	77.717
PVRL2	6.81356	7.2056	0.990699	1.06758	1.04199	1.16204	1.16604	1.06775	1.01266	0.829767	1.01723	1.01824	1.20993	1.03671	1.0232	1.03419	1.0999	0.993568	0.994198	1.04927	1.04864	1.03238	1.08762	1.04684	60.5687	11.9287	89.9783	117.645	54.3239	69.0626	65.0448	83.997	61.9707	68.7795	115.425	26.8107	101.761	57.1625	47.9556	49.6859	48.5667	73.5135	56.1484	24.6662	45.1817	67.951	99.1339	39.5336	45.5688
WTAP	7.13914	7.57756	1.09835	1.08572	0.97245	1.0915	1.1063	0.933243	1.03225	0.998162	1.03353	1.02157	1.09633	1.01018	0.988287	0.989235	0.957211	0.955484	0.969571	1.01185	1.00025	1.00402	1.1054	1.02195	65.0045	12.7782	65.7691	52.5074	56.0097	41.9455	84.4814	61.5982	64.0411	105.204	167.987	32.2	66.1628	59.2802	38.4593	49.0508	64.0267	54.1819	105	45.646	123.913	62.3308	92.7838	45.9481	98.5682
PAIP2	8.6888	7.92797	0.97694	0.955153	0.982137	0.930885	0.938903	0.856087	0.97877	0.991567	1.08113	0.894865	1.03204	0.995379	0.964098	1.0208	0.955594	0.995513	0.9732	1.02194	0.977402	1.01485	1.05659	0.980659	76.3151	26.9863	95.3021	62.0238	60.3871	47.5431	71.7213	61.2222	81.2164	103.794	133.287	78.9598	67.9872	77.3225	44.3966	64.492	33.7788	67.1111	59.7324	72.9901	41.819	56.0084	79.2459	57.211	94.9918
MANBAL	8.33962	8.45803	0.983098	0.991177	0.974971	1.05018	1.12689	1.03024	1.03265	1.01209	1.05382	1.01299	1.10908	1.10143	1.05874	1.0013	1.00901	1.07534	0.964072	1.07504	1.01251	1.03304	0.919875	1.02988	70.8351	16.8495	77.8575	63.1345	60.948	51.5262	134.655	59.4425	75.7202	69.101	61.8266	22.5322	66.7119	58.0842	36.8522	55.3446	84.9887	37.4618	72.7666	45.2548	107.506	57.3652	64.7007	53.7409	65.4058
DNAJC7	8.10482	7.95224	0.925718	0.972218	1.0062	0.914911	1.03065	1.00936	0.974969	0.941029	1.08131	0.92208	1.22993	1.02938	0.964761	1.03621	1.07369	1.16273	0.929298	1.03798	0.99135	1.03469	0.88718	1.00741	68.2782	16.1192	66.0666	54.3117	73.6515	60.5732	76.104	61.6901	107.77	90.8447	114.346	38.5097	69.0232	58.3063	66.2601	75.6813	85.1718	65.0316	70.8169	73.1285	86.6162	86.0979	84.0573	52.4187	115.657
RBBP7	8.354	7.64949	0.963444	1.00327	0.997994	0.982305	0.994386	0.911317	0.988933	1.04044	1.21085	0.945453	0.821909	1.00957	0.997987	1.02848	1.01302	0.948586	1.01978	1.19048	0.955607	0.981614	0.829509	0.99214	60.1627	22.3604	73.7509	58.1098	75.7842	42.2536	86.7658	51.9184	74.2085	74.0379	146.267	48.5836	62.4455	56.0338	46.1922	64.2725	86.0043	45.0729	56.06	63.6598	85.8781	66.2783	93.7815	49.5267	108.348
PTGFRN	7.62061	7.87308	0.992616	1.1222	1.10272	1.18929	1.16373	1.1825	1.17358	1.1334	1.0968	1.13463	0.720833	1.16608	1.17201	1.05168	0.938924	1.08417	1.11709	1.35822	1.09877	0.755824	0.852284	1.07654	66.9941	6.09165	167.032	31.0018	84.9882	26.9212	47.8106	31.7431	92.3128	49.408	81.9921	11.4034	103.081	23.5327	29.0936	44.1786	124.963	22.4834	142.231	18.2252	78.688	50.4303	130.663	26.0541	35.0342
RBM42	8.64979	8.84814	0.98621	1.03188	1.00712	1.00627	1.0001	1.03204	1.01447	0.948949	0.935061	0.945929	0.893131	0.98768	0.993022	0.986062	0.972871	0.991307	0.923201	1.00631	0.99978	1.00296	1.07991	0.987822	60.7969	14.3205	77.9798	79.8114	78.7576	62.1904	94.656	56.5666	76.6406	64.7448	92.1277	32.7384	99.2785	44.8006	51.9712	45.2685	51.6891	53.8274	86.3992	38.516	61.8559	56.8228	96.1805	44.7503	79.8263
MRPL18	9.10338	9.02085	0.984679	0.985653	0.96751	1.04545	1.05028	0.999792	1.02405	0.984539	1.08501	1.02775	1.00763	1.01803	0.955096	1.05022	0.999304	1.02591	1.03873	1.05839	0.995258	1.04907	1.13119	1.02303	63.0151	13.787	57.1039	64.5855	89.7681	53.4241	88.2517	43.4589	99.3975	73.8196	132.356	37.6216	57.5046	52.4894	43.6497	51.2203	101.276	65.6095	114.594	60.8003	142.93	68.5501	77.4696	45.4487	109.916
TXNL1	6.79172	6.83447	0.974659	0.992863	0.983078	1.09561	0.948353	0.841898	0.94011	0.973122	1.02059	0.929859	0.823153	0.975121	0.976133	1.03937	0.964612	0.998916	1.0664	0.990924	0.963279	0.982012	1.01131	0.975779	55.612	21.2052	84.7909	68.2107	50.9131	64.3223	49.1254	56.2492	81.3693	86.8099	105.594	40.0689	62.1003	72.819	67.5315	69.7022	68.2371	70.4266	56.943	63.9144	51.9705	87.3336	53.5827	60.3127	95.1123
C1orf144	8.31965	8.54257	1.0268	0.999739	0.997429	1.0213	0.992963	1.03002	1.01275	1.06881	0.980568	1.02329	1.01665	1.00913	1.00755	1.03959	0.944751	0.957007	0.992294	1.01167	1.01812	1.00606	0.990424	1.007	59.4287	12.3131	87.6028	55.3558	43.7334	51.4327	89.1197	60.4051	71.6314	71.8693	110.317	35.4787	74.9251	47.8878	49.6778	56.4598	126.938	50.191	100.618	48.0869	93.7233	70.4677	93.8993	48.4582	55.7678
EMP2	5.6039	5.68506	0.994865	0.988465	0.9889	0.989515	1.0196	0.987246	1.05227	0.985615	0.958813	1.0053	0.984571	0.995055	0.987479	1.0121	1.02148	1.05274	1.08686	1.0367	0.981776	1.05018	0.956698	1.00649	111.253	9.92129	73.2638	91.2146	51.7569	72.252	133.105	112.086	48.3716	180.345	172.054	14.6605	53.2843	82.7762	90.6442	87.1562	39.6153	97.9034	13.8355	70.0421	50.1347	93.1125	102.025	56.7808	87.5479
SLC16A3	7.83743	9.43988	1.32088	1.07935	1.0938	1.26068	0.95855	1.2694	1.17454	1.06864	0.961297	1.05712	1.01905	1.08082	0.938902	1.04058	0.987236	0.99556	1.11069	0.991724	1.09521	1.00855	0.776892	1.0614	156.766	6.47441	116.317	228.492	91.4729	31.92	110.158	21.0909	106.982	10.6454	87.0526	53.0682	89.3604	18.7993	27.0041	16.6887	168.167	13.0303	164.942	6.43071	76.031	30.3593	447.542	9.93191	57.5788
ADI1	6.83064	6.62721	0.916434	0.925486	1.04499	0.925826	0.93192	0.968003	0.965334	1.01602	1.0043	0.953431	0.838336	0.993827	0.918715	0.998951	0.970402	1.02649	0.93281	0.962397	0.973549	0.706861	0.795603	0.941414	114.188	27.6792	54.2662	52.8121	69.0385	49.8697	49.0871	55.5696	52.294	66.2137	113.99	61.7702	53.3778	43.0689	55.321	79.944	59.2703	48.513	53.655	42.0169	64.4602	50.4395	75.6191	37.9672	142.722
OAS1	6.55649	6.56428	0.87975	1.21566	0.982108	0.997706	1.38946	1.0679	1.09803	1.13324	1.20721	0.997715	1.25766	1.06312	1.1252	1.13607	1.12293	1.08419	1.02156	1.06234	0.953436	1.13584	1.24765	1.10375	54.3741	7.71872	88.0135	103.609	9.43627	55.6294	75.5867	70.3771	297.905	25.4591	64.1614	6.56041	206.832	41.0387	114.296	81.8665	97.1096	42.9087	92.4884	45.845	73.9565	94.1025	48.2809	17.7273	50.4958
ADH5	6.10082	5.84196	0.872067	0.910925	1.007	1.01876	0.913803	0.991349	0.937476	1.00441	0.921693	0.947517	0.931455	0.953184	0.971877	1.0125	0.936783	0.977151	0.894648	0.98403	0.960436	0.819678	0.895944	0.945842	100.638	14.4771	127.981	53.2437	53.0796	46.1406	37.1405	40.3961	168.171	67.4509	188.221	44.5898	76.7096	28.9534	69.2855	68.2276	55.2158	45.7873	77.3494	29.9036	98.2216	57.0905	79.0345	21.2054	108.309
TARS	7.9222	7.94582	0.993291	0.972454	0.909827	0.998755	1.14281	1.02616	1.04569	1.02427	1.28235	1.02844	1.0011	1.1442	1.1056	1.10554	0.947348	0.910026	1.18475	1.22427	0.944645	0.999711	0.816504	1.03846	77.8464	10.0636	77.5272	32.068	71.6271	44.9702	83.9727	47.2892	88.9794	41.8789	76.4018	22.3644	65.9014	71.9472	54.2715	56.034	128.303	36.7142	147.711	82.135	101.643	88.7126	96.3212	56.0291	118.553
GADD45B	7.17287	7.03094	0.993758	1.03895	1.03814	1.18596	0.859874	0.894914	0.940905	1.03218	1.00486	0.83629	1.08778	0.924484	0.929297	0.955772	0.90154	0.81417	0.972928	0.979336	0.985344	0.928266	0.998459	0.966819	16.2019	14.8362	170.565	69.126	33.8607	53.12	14.7168	89.6794	21.8499	173.734	60.7237	38.2564	49.0699	22.2105	24.8875	23.9105	20.0496	44.9344	53.7472	24.2645	17.4144	35.0327	40.0652	12.0396	38.0097
MYO1B	7.36519	8.76921	1.08573	1.26388	1.13288	1.23632	1.25321	1.29573	1.14258	1.04675	1.06518	1.07974	0.953498	1.16955	1.12785	1.11285	0.989357	1.11746	1.06286	1.15417	1.10932	1.02428	0.920291	1.11159	88.7549	3.35164	87.4323	26.3126	66.3599	18.0485	87.2898	15.1143	137.265	34.388	73.1373	8.56854	67.2333	9.69341	46.167	88.9342	140.453	34.2185	181.91	9.63348	331.249	65.4415	83.198	16.0641	35.0185
EPS8L1	6.10126	5.83203	0.948446	0.876651	0.859764	0.808427	1.21685	0.969615	0.900452	0.638412	0.999636	0.852064	0.915743	1.01346	0.95825	1.04719	1.05152	1.01421	0.734929	0.879983	0.95337	1.00518	1.07079	0.938807	15.4116	5.00056	14.9284	136.326	11.6927	193.181	5.33233	46.4221	20.685	42.92	51.421	3.00628	40.6369	131.544	70.0181	31.973	78.879	28.1516	32.8901	71.4986	20.4772	137.997	31.7998	46.3466	4.55825
SAE1	10.4318	10.308	0.987618	1.04214	1.02648	1.03614	1.02985	1.01921	1.03788	1.03434	0.965047	1.02096	0.818503	1.01443	1.0407	1.05041	0.945924	0.95772	1.11549	1.0363	1.03044	0.962246	0.971947	1.00685	65.062	11.635	67.3533	44.0427	73.2352	45.5211	88.2086	51.9017	78.7878	68.3096	121.196	29.9308	79.9115	41.3662	33.4934	49.187	84.0489	37.1019	103.403	41.3161	52.554	56.7984	106.424	35.8182	103.863
BAD	6.80211	6.66634	1.02464	1.03245	0.973951	1.04279	1.03428	0.98004	1.01868	0.978142	1.13228	0.877014	0.987528	1.04574	1.02644	1.01727	1.02372	1.0082	0.944327	1.01714	1.03107	1.03978	0.909977	1.00693	98.915	24.7361	104.251	112.127	128.129	48.2754	86.3284	50.4126	45.3902	61.0544	72.0122	33.9705	51.7469	36.0133	44.8545	45.1007	93.6162	39.9147	87.8643	33.7491	186.515	40.2958	59.4443	37.2923	71.1989
ERBB2	7.43077	7.10756	0.902358	0.925431	0.910912	0.870813	1.14467	1.0457	0.955857	0.936172	0.905107	1.10418	0.816146	1.00803	1.01163	0.984011	1.11068	1.04375	0.894751	1.01959	0.95301	0.851621	0.841604	0.96362	75.2404	26.1893	42.0027	126.527	32.328	115.05	46.4204	114.434	51.8995	108.117	133.095	26.8686	59.1103	75.4815	93.7368	69.454	68.5015	75.826	35.7622	66.5473	55.6826	143.879	57.9723	44.3709	41.6086
MXRA7	6.72613	7.00653	1.12094	0.955514	1.03096	1.13231	0.885345	1.05782	1.01988	0.930023	1.00179	0.933321	0.896041	0.978709	0.940738	0.98829	0.997637	0.940094	0.958891	0.927807	1.0049	0.979564	1.01906	0.985696	130.082	16.9827	165.875	40.1965	66.9362	12.6185	59.1656	38.5793	46.1196	62.7483	60.7845	49.3679	77.498	27.9836	12.8383	39.7063	146.28	27.15	78.5866	34.7155	123.628	23.1101	65.9159	24.2595	148.131
SMARCB1	7.71568	8.26943	1.02453	1.01265	0.999508	1.04707	1.0959	0.968559	1.0208	0.947326	1.07622	1.02429	0.796099	1.04464	1.041	0.998222	1.02739	1.00205	1.01343	1.13345	1.00102	1.06296	0.895877	1.01109	89.2758	15.7101	87.5772	60.8805	72.9375	50.3503	71.9693	51.5432	72.1529	77.4042	98.2451	23.1457	78.5607	46.3623	37.2746	45.8775	71.0913	46.6769	98.7274	41.052	150.878	64.5093	97.162	42.3296	111.516
GPS1	7.83802	8.01028	1.0242	1.01991	1.00276	0.979737	0.95507	1.10283	0.985078	0.982827	0.968799	0.994456	0.935773	0.989006	0.972786	0.967142	1.07118	1.0618	0.972372	0.962173	0.995557	1.03061	0.796813	0.989089	95.5596	21.0126	85.2075	67.6772	81.3305	53.9595	99.0269	52.1023	71.2697	64.9087	94.454	67.3059	66.7223	37.5106	50.8491	52.3087	86.0168	49.16	81.6856	52.536	93.5166	59.2691	82.6898	46.8517	69.6504
BLVRA	9.14385	8.93332	0.920921	0.965223	0.991813	0.964451	1.02684	0.935304	1.08997	1.02009	1.03113	0.993922	1.08042	1.00525	1.04106	1.01527	1.01417	0.968741	0.947926	0.970971	0.963454	1.03105	1.05314	1.00148	99.3799	9.71983	79.355	59.0063	147.776	61.1933	80.7648	73.8305	97.5717	58.8491	124.99	40.7825	72.4636	47.3803	50.9831	44.632	71.9734	40.1577	55.1579	44.2243	53.8275	64.3688	56.6736	33.1611	80.5251
C20orf30	9.56607	9.52514	1.04048	1.00829	1.03121	1.01606	0.945343	0.954136	1.03753	1.02721	1.07027	0.886002	0.909804	0.970038	0.950661	1.0098	0.930487	0.927587	1.0011	1.04947	1.037	0.994703	1.01646	0.991126	69.1046	29.571	113.117	55.0788	77.7282	27.5683	108.237	35.4537	78.6298	72.0131	92.8673	67.7397	68.849	36.0465	25.2103	43.5582	168.234	40.1287	109.13	37.7654	96.2561	38.673	85.1515	26.8889	166.941
C15orf24	8.41713	7.75405	0.962623	1.02077	0.99491	1.01525	1.06701	1.02675	1.07531	1.04671	1.16412	0.912559	1.08246	1.0379	1.04386	1.013	0.961832	0.944644	1.04413	1.11993	0.99037	0.81974	0.833684	1.00846	90.6587	22.4961	96.3589	54.333	53.7141	47.0812	94.1268	54.7068	92.7388	83.6693	96.8257	42.3477	79.2975	55.104	41.0815	56.916	92.0616	52.0818	64.3733	57.6628	99.7992	65.465	54.2266	52.1677	83.651
BCL3	6.98647	8.35818	1.0346	1.10223	1.0834	1.0976	1.24447	0.940171	1.01032	1.05099	0.93705	0.988368	1.10017	1.03135	1.00918	0.933296	0.963419	0.890442	0.948466	1.02186	0.979731	0.890868	0.911242	1.00806	70.0771	3.52484	71.4278	229.061	55.3245	84.3058	85.1537	52.8345	48.361	70.9811	154.716	11.9839	87.802	81.363	59.068	48.5066	33.8415	108.587	50.7033	21.7533	65.7775	98.0621	136.875	45.6143	34.7361
RAB38	6.70389	7.37446	0.975415	1.01664	0.782441	0.853851	1.58904	1.19181	1.05599	1.03112	1.0257	1.0633	1.02956	1.13927	1.33797	1.05877	0.971396	0.949737	1.00805	1.3602	0.990462	1.01004	1.15287	1.07589	64.499	0.438707	45.1303	11.6664	1.14695	62.8614	37.7233	57.7936	115.307	86.1841	26.1286	1.08915	30.5515	54.6772	72.4062	81.5648	107.31	92.1306	89.3902	48.3354	298.42	95.0314	19.0872	58.3532	46.7102
RALB	9.02749	9.21794	1.02433	0.971919	0.961522	1.07478	1.11803	0.970956	1.03239	1.01817	1.02035	0.958766	0.951761	1.0338	1.06112	1.03275	0.94553	0.941632	1.03692	1.10673	1.00147	0.996788	1.00524	1.01262	147.029	13.8432	85.2986	51.1679	78.0442	83.3251	34.5048	49.9424	82.0893	56.5868	60.346	28.236	68.8309	52.9617	80.0163	67.9713	93.9292	48.2864	111.839	28.2153	275.127	76.8923	111.283	36.1877	88.3453
CXCR7	7.48168	8.5565	1.36446	1.18854	1.14415	1.3791	1.10841	1.10597	1.31145	1.0889	1.02369	0.983667	0.855662	1.09749	1.04958	1.02149	0.882887	0.924802	1.18738	0.994125	1.07859	0.944555	0.997032	1.08247	136.763	2.34055	152.242	93.3301	254.447	30.7715	66.8807	93.4889	6.69978	103.515	72.2579	25.7238	40.5362	5.32771	25.0097	15.139	82.396	10.9023	102.762	8.89055	133.97	44.4617	171.433	5.61498	13.5452
HSPG2	5.78056	6.06441	1.04668	1.00867	1.04196	1.05104	1.00246	1.00801	0.997555	1.05637	1.16492	0.923781	0.698269	1.10784	1.04777	1.0682	1.1773	1.36985	0.971312	0.958515	1.07889	1.264	0.725991	1.03664	115.775	6.71018	254.898	24.739	96.5284	21.2305	59.3444	60.6268	36.0141	100.591	164.735	58.2712	140.125	8.41017	21.9422	47.43	77.8608	21.0872	98.4433	24.0103	189.673	33.8402	143.076	10.3512	68.0412
DEGS1	8.88606	9.68883	0.918459	0.986042	0.975328	1.06798	1.09034	0.988081	0.944909	1.00967	0.901758	1.04937	0.861374	1.0425	1.05533	1.04203	0.940227	1.03383	1.09529	1.08547	1.01259	0.988393	0.870481	0.998069	65.6476	10.8135	101.77	22.9113	73.4837	27.1999	91.8891	69.8813	89.5579	266.443	83.6261	23.7456	77.4006	56.9042	54.658	78.9144	144.688	41.4136	61.9073	69.3878	63.7754	27.4056	28.9613	47.9245	102.054
PSMD6	10.1773	9.3015	0.921516	0.988086	0.979202	0.986345	0.956691	0.911161	0.95259	0.984569	1.01283	0.94664	0.984303	0.967468	0.965705	1.04731	1.0206	1.04471	0.964992	1.02031	1.01044	1.02687	1.01654	0.986137	51.429	19.0794	57.3668	62.4322	40.1426	70.3791	95.0939	76.0729	100.717	101.064	141.998	53.8751	66.6516	76.3123	75.0914	98.4564	40.6079	63.4752	62.6925	63.8147	48.9132	95.9177	58.0983	76.5929	76.0238
ETF1	9.11584	8.96083	0.92646	0.934048	0.975725	0.977113	1.06445	1.06255	0.982995	0.9932	1.03027	0.985162	1.12247	1.03077	1.03042	1.02809	0.963439	0.999776	0.928955	1.02262	0.981968	1.0072	0.947011	0.999747	74.8346	13.7647	73.3331	58.2326	86.9975	60.1247	74.2923	78.7617	74.7798	96.6748	140.155	38.7622	51.6921	91.9601	57.4311	66.102	41.1943	67.9246	60.1185	70.2952	50.4059	105.753	90.0017	73.7827	70.327
LTBP4	7.48383	6.89127	0.994531	0.781288	0.969009	0.878097	0.712222	0.990696	0.896391	0.821781	0.919345	0.911526	0.745815	0.900481	0.894437	0.941445	1.01462	0.981487	0.848376	0.872346	0.9365	0.952659	0.891458	0.897834	54.3957	12.3795	61.8279	64.9215	97.8256	69.4996	34.4315	85.0324	33.6934	75.3934	56.7142	157.608	76.2644	27.8663	14.1636	41.7434	25.3637	28.5905	34.7948	42.9136	62.8534	82.4013	33.5264	22.0335	24.1539
PNRC1	5.80147	5.69252	0.888091	1.01752	1.04509	0.982804	1.01753	0.999101	0.989132	1.13919	0.630763	1.03464	1.56858	1.01617	0.975893	0.892415	0.934978	1.24617	0.961102	0.926925	0.960109	0.617794	0.775602	0.981886	100.364	13.0578	129.789	69.2241	98.4384	57.7673	64.121	55.8291	55.5744	133.748	150.853	71.0851	66.4183	30.827	24.8815	40.9894	52.2512	71.2334	122.619	56.0712	47.8374	52.6388	97.4257	31.4653	59.9328
RARRES2	7.67729	7.24139	1.14233	1.06309	1.12982	1.18422	0.803249	1.04308	1.00981	0.949799	0.931447	0.79268	0.712168	0.907704	0.962154	0.964398	0.925009	0.849344	0.861407	0.858325	0.996828	0.98403	0.832077	0.94776	59.8961	7.32015	333.796	22.7812	85.8695	18.8539	27.5474	40.9752	12.3567	172.54	160.695	52.2006	264.454	8.75693	3.1268	35.5678	10.373	10.5358	33.264	9.22631	22.3745	30.9861	124.132	14.6063	6.32975
LAP3	8.77645	9.03907	0.910984	1.26965	1.02888	0.963609	1.13959	0.935175	1.0752	1.01795	1.09218	0.974142	1.09513	0.955149	0.976521	1.08733	0.990488	1.04459	0.99494	1.04928	1.00062	1.06856	1.15994	1.03952	55.0344	13.0444	80.7904	81.6345	33.7711	36.2851	104.224	50.082	285.81	125.038	104.714	41.8682	222.243	43.3	93.2221	110.502	40.2532	34.8156	159.696	92.587	70.3959	46.1906	76.213	32.6872	31.5487
NDUFA6	8.19688	7.01874	0.959241	0.953294	1.0015	0.932528	0.92453	0.953369	0.957437	1.03354	0.952148	0.935926	1.12161	0.941078	0.829618	1.01764	0.928928	0.940857	0.967695	0.909954	0.932717	0.766726	1.03481	0.95215	84.2864	19.2082	92.066	47.7466	77.8804	48.9285	66.6495	50.0662	75.9056	100.965	96.087	94.576	54.5752	53.985	42.7778	48.7148	79.2893	58.0598	46.0535	64.3255	74.8985	56.451	71.2408	44.3102	115.65
ERGIC1	7.10965	7.13875	1.04516	0.972433	1.03358	1.00017	1.01187	1.03426	1.00764	0.938497	1.03145	0.952825	1.26898	1.01581	1.01425	0.962476	1.08793	1.05237	0.857992	0.994137	1.00476	1.05927	1.17959	1.02502	72.4084	51.4685	80.7891	139.095	116.03	49.0973	128.604	46.0599	48.3077	60.379	116.324	80.0363	64.8843	34.2809	41.9986	67.0907	49.993	45.9145	79.4401	44.4025	51.7116	70.3689	206.135	46.5562	83.5349
COPS5	9.73623	9.51167	0.976936	0.991762	1.02236	0.971389	0.962451	1.05022	1.05933	1.08539	1.02294	0.986034	0.921779	0.989287	1.00423	1.04372	1.00943	1.03027	1.12713	1.02684	1.04521	1.00905	0.947458	1.01349	59.1761	17.2825	91.7062	44.6027	79.1898	42.4473	79.3587	47.5019	80.8461	73.522	95.2443	60.9692	58.4357	51.1964	42.4932	47.5983	68.4831	62.7757	70.4305	55.1649	83.6447	62.4565	78.5144	43.8834	119.388
STAT6	7.98646	8.09831	0.983068	0.973407	0.988739	0.981664	1.07907	0.972606	0.982794	1.06902	0.929282	1.01356	1.05237	1.03278	0.997645	0.974198	1.09809	1.0343	0.963275	0.910962	0.980459	1.11277	0.726116	0.993151	52.9604	11.4897	65.2251	95.5984	74.0606	62.3426	101.213	68.7578	83.6056	97.2479	114.14	21.3632	73.3797	48.9506	56.7577	69.9132	126.63	58.1891	132.257	46.141	40.1479	83.0536	88.5114	52.7267	44.0304
EGFR	6.49519	6.5561	1.01674	1.02007	0.941419	1.04691	1.08233	1.04936	1.05969	0.895596	1.00675	1.06162	0.984344	1.08738	1.26219	1.00487	1.00641	1.0409	1.06823	1.0814	1.00371	0.9311	0.996976	1.03086	699.686	4.80727	66.1611	17.4987	37.4198	21.631	49.1996	23.7445	22.0621	53.6812	71.7765	8.18581	31.4498	22.5971	20.0368	33.2565	53.3031	12.0757	796.321	17.9177	1078.55	54.9317	43.343	13.3379	31.3651
RPL9	11.6918	10.7753	0.903897	0.958683	0.990341	0.93269	1.00101	0.853522	0.952546	0.999437	0.940063	0.986579	0.790796	0.988298	1.00228	1.00948	0.949205	0.991447	1.06309	0.99595	0.996973	0.994982	0.976567	0.965611	14.4354	4.77801	14.8664	15.8306	17.0251	66.8308	65.2652	70.0143	101.107	157.938	17.6831	10.5762	51.5942	97.2979	87.9277	136.365	63.0658	84.7675	133.615	147.322	137.719	206.765	94.2369	93.3226	24.494
TSKU	8.2456	9.11045	1.06229	0.979802	0.946131	0.97336	1.16464	1.23662	1.06181	1.06532	0.913228	1.1084	0.788712	1.05868	1.08869	1.00366	0.947245	1.00714	1.11578	1.09746	0.993071	1.00416	0.944484	1.0267	179.78	3.67831	96.837	55.0411	84.1258	46.4262	46.9479	38.9484	71.2278	121.014	50.8013	9.79843	77.5268	44.2467	71.247	36.8569	91.1762	47.1758	95.4016	52.3747	172.52	82.5062	105.623	32.5601	109.27
AGPAT2	7.10903	6.5086	0.982096	0.892462	0.949253	1.05363	1.14348	1.06158	1.03394	0.842413	1.06837	0.931842	0.910987	1.04988	1.07331	1.05213	0.919548	1.04876	1.01283	1.01037	0.928225	0.808569	0.906689	0.984779	85.2264	16.8271	85.1873	108.728	105.91	76.8928	65.9556	61.2374	57.8294	51.345	48.2967	23.4408	50.1625	45.2148	37.2553	51.447	86.3972	44.6805	48.887	35.2105	84.6484	70.8761	141.119	44.9601	74.3487
DDX39	7.73703	8.38742	0.984453	1.11791	0.973906	1.09022	1.15322	0.974195	1.05685	0.97535	0.985602	1.00364	1.05391	1.01818	1.03175	0.988959	1.01022	1.03551	0.958513	1.01875	1.04053	1.03998	1.02469	1.02554	179.172	4.08627	92.4003	45.2861	60.5536	49.0847	194.804	44.4592	60.4426	46.0789	113.61	11.7302	83.2796	40.5267	47.7428	56.8291	79.9265	63.3558	70.8904	43.5923	102.783	69.0455	97.7679	44.191	102.567
COPS7A	9.60985	9.49036	0.953062	0.983213	1.02971	0.984371	0.938109	1.09112	1.04033	1.01885	0.983789	1.08449	1.05054	0.995992	0.971354	1.00336	0.996752	1.02911	0.97015	0.990153	0.976708	0.997213	0.887771	0.998864	95.9177	19.1744	71.4681	48.6746	85.1497	51.9882	49.7973	55.6828	70.5123	69.3963	64.2292	63.9614	74.28	48.94	52.8734	50.069	79.1627	53.1013	84.952	53.2608	104.797	60.3659	58.5652	45.4639	67.7318
TRAPPC3	8.4525	8.67955	1.00797	1.04475	0.998513	0.993059	1.0875	1.07475	1.09364	1.05	0.956183	1.05762	0.850331	1.00298	1.04234	1.00677	0.944676	0.975008	1.07835	1.03782	1.03082	0.996374	0.948819	1.01325	67.0774	15.9636	78.7159	56.9405	35.1092	68.0061	82.0295	76.5453	86.3016	72.7042	105.06	26.6102	64.7633	58.5406	65.5644	74.2132	116.12	64.5912	63.8788	49.8401	95.7332	102.236	75.012	59.726	44.2205
ILF3	7.33648	7.31084	1.06143	0.996505	0.99003	1.04855	1.03722	1.00861	0.96672	1.08649	0.97827	1.02785	1.05566	1.01472	0.995546	0.991722	1.13194	1.03867	0.934883	0.973735	1.05865	0.898921	0.890327	1.00888	130.704	13.312	78.586	56.6334	64.9677	47.0507	108.437	51.8233	71.9472	73.599	144.686	33.3037	63.0195	38.3245	38.5371	57.9787	111.61	44.1209	119.044	45.785	92.9991	82.6113	94.1453	27.5986	101.957
VPS4A	7.45816	7.26832	1.07901	0.951118	1.02588	0.995839	0.891116	1.07769	0.974545	1.01769	0.967747	0.992787	0.989775	0.996248	0.958787	0.970847	1.0046	0.942332	1.04661	0.898706	0.987882	0.936148	0.804907	0.976679	56.0548	25.0791	85.6688	57.8914	70.0065	57.4759	100.92	62.0411	55.4624	63.4134	116.307	78.5928	53.7772	55.8568	43.7878	52.6533	103.46	61.9125	70.4589	61.5782	80.3881	80.7078	68.1067	53.5688	84.7396
SUMO1	6.28132	6.53714	1.0566	1.04505	1.00473	0.995246	1.05978	0.960546	1.02612	1.02484	1.07589	0.959482	0.939967	1.02344	1.02833	1.03455	0.959127	0.959377	1.0104	1.077	0.993403	1.01802	1.05042	1.0144	97.4736	17.0505	82.5556	63.8666	130.598	38.9771	67.0959	49.6791	115.631	83.4576	143.571	41.4274	60.4997	54.6281	39.2019	47.46	87.8685	50.425	74.2257	50.9278	98.4625	54.6075	72.1459	38.6493	55.1311
ERO1L	7.01297	7.90706	1.13028	0.835096	0.801073	0.912184	1.29011	1.07192	1.15576	0.923361	1.00442	1.00176	0.947012	1.11884	1.14945	1.04061	1.00116	0.916484	0.910274	1.02231	0.921922	0.929835	1.09716	1.00862	57.8832	6.22833	76.327	45.8389	30.476	105.356	30.1156	25.9139	37.0438	18.7641	54.388	6.98526	53.3188	223.333	59.4147	66.1689	108.554	58.8935	157.841	40.8283	75.3908	78.8092	162.18	27.0746	31.6825
MTA2	7.4557	8.22638	1.00516	1.03716	0.940369	1.01765	1.22034	1.04637	1.02242	0.944987	0.946955	1.22652	1.13512	1.06485	1.0631	0.977183	1.21058	1.07629	0.918042	1.0701	0.987617	0.823071	0.913982	1.03085	127.473	7.07721	74.062	55.5998	53.4684	65.508	76.4137	64.2704	67.5257	74.1192	91.2446	12.9755	62.0363	68.5405	56.8398	59.5091	100.223	60.1824	82.713	54.461	170.738	93.2996	93.0732	49.8403	68.0844
TMPRSS11B	6.43663	5.28836	0.570061	0.628356	0.642524	0.618783	0.990175	0.57444	0.733463	0.589639	0.666151	0.70564	0.820426	0.803711	0.815227	0.988723	0.990124	0.92551	0.740625	0.843543	0.775347	0.99522	0.961307	0.779952	0.892007	0.038885	0.461636	34.1421	0.0701357	206.889	0.00850334	95.4823	0.256285	0.263544	0.108425	0.287843	5.32413	273.68	24.3936	2.2006	0.0797615	5.09249	0.38433	59.3592	0.379056	154.219	0.0432797	34.2242	1.60315
UQCRQ	10.3913	9.96103	0.890136	0.923325	1.00695	0.912297	0.943636	1.00147	1.0115	0.996694	1.05439	0.949984	0.969354	1.09168	0.954651	1.02043	0.966294	1.05386	1.00944	0.91254	0.933566	0.993474	0.93203	0.977509	72.6367	27.7368	60.1036	51.6407	92.4519	64.3898	88.3725	69.9301	84.0863	82.4089	69.279	96.091	47.9922	64.8903	71.8311	57.8524	40.2135	79.5649	36.2118	75.4174	33.0521	70.3994	75.797	72.0815	65.4522
MRPS7	6.47219	6.85873	1.03055	0.940802	0.995884	0.92375	0.931223	1.05553	1.02242	1.26108	1.22623	1.03339	0.849238	1.0197	0.926391	1.02301	1.0503	1.00869	1.03734	0.945045	0.982213	1.07716	0.81276	1.00727	79.6259	16.8737	64.6167	48.955	56.2256	47.5751	69.9631	61.2336	73.8136	61.0912	85.6502	86.8189	57.8345	51.0653	46.3343	50.6797	90.9824	58.2055	69.8959	58.799	83.1702	65.4056	88.7456	57.8166	130.332
DHRS7	9.76827	8.30454	1.01593	1.07725	1.05782	0.974254	0.944086	0.946682	1.09236	1.03596	1.12396	1.00097	1.07336	1.01205	0.995875	1.01922	0.979827	1.0315	0.99372	0.999297	1.00447	1.02417	0.809305	1.0101	67.7955	167.984	103.004	64.6409	62.4128	34.8209	49.1006	50.7272	80.7036	50.1652	44.0502	99.8399	67.7271	34.0123	99.8705	104.368	61.807	70.421	79.9627	45.0983	85.9551	31.4788	64.0573	35.3559	30.9544
TMEM111	8.99574	7.30388	0.973972	0.962401	0.979699	0.884153	0.919042	1.01158	0.966584	0.689114	0.956422	0.930599	1.21305	0.948895	0.873198	1.02721	1.05424	1.049	0.880083	0.839738	0.993394	1.13965	0.843555	0.958837	64.5105	25.6211	49.5892	80.7045	51.7573	85.0281	87.6842	72.7554	98.5243	98.5254	100.736	63.5428	69.3567	78.96	72.6377	71.973	65.8874	89.7166	41.0902	61.9486	46.1707	93.2905	57.4733	57.5917	54.1006
ALG3	7.11701	7.38456	0.999917	1.04388	1.0058	1.09514	1.10911	1.17378	1.04547	0.989786	1.03657	1.08738	1.0677	1.06031	1.07554	0.99477	1.08463	1.06536	1.03348	1.05602	1.04046	1.05214	0.838002	1.04549	130.452	12.1427	78.4355	34.4419	109.87	34.9494	116.729	28.5587	54.3066	35.9377	49.4223	15.8049	53.3873	22.0382	38.1232	40.4353	80.6021	36.1516	67.0926	25.7191	112.656	54.0161	108.608	29.3679	125.201
ELOF1	7.29988	7.4104	1.04126	1.002	0.989228	1.05078	1.07775	1.05054	1.02827	0.984672	1.12947	0.957047	0.878457	1.05912	1.00473	1.02748	0.969808	1.10673	0.988452	1.04874	1.0382	1.05535	0.913234	1.01911	107.997	23.6676	98.8626	74.9204	67.514	41.9639	103.184	51.3994	93.8781	74.5248	77.0387	33.5754	65.8646	48.8263	44	49.442	80.2842	64.3408	80.6164	62.0852	127.451	67.5907	74.9775	54.4284	99.7245
DNAJB2	8.58889	7.69028	1.03824	0.961851	0.986359	0.9541	0.938402	1.07226	1.08599	1.03491	0.990925	1.06998	1.18731	1.03737	0.975271	0.988707	0.991765	1.02746	0.975822	0.9359	1.04037	0.800764	0.877668	0.99864	54.691	24.8139	102.346	83.3112	129.164	47.2385	105.07	38.0472	54.2556	88.7241	57.8901	42.5243	77.007	41.335	38.3686	49.5331	145.644	58.3195	85.7758	64.7822	148.392	53.4636	88.3811	41.2171	67.0776
MFGE8	9.9362	9.81098	1.06586	0.951956	1.06288	1.04697	0.865402	1.12112	1.10382	0.987521	0.871745	1.05616	0.77667	1.0248	1.01106	0.995767	0.955694	1.07449	1.06699	0.987444	0.994546	0.969742	0.789418	0.989527	97.9981	11.0588	209.049	14.2875	133.983	18.9342	53.5237	46.886	124.559	91.3953	96.6546	75.3653	127.477	19.7768	18.7062	62.638	27.1785	32.3077	72.5558	28.7289	132.073	15.5753	84.7876	23.7968	81.4012
FURIN	6.87097	7.09696	1.13597	1.11254	1.03289	1.19805	1.19672	1.21806	1.01855	1.05266	1.00212	1.21726	1.04885	1.05229	1.11202	1.00101	1.08886	0.980753	0.995893	1.14545	1.10712	1.11061	1.0807	1.09088	90.886	116.312	136.272	31.4056	77.7277	41.7942	286.925	41.993	94.4519	106.378	96.7038	25.5621	123.629	21.0643	41.6146	70.4505	88.74	39.9059	73.9504	27.7618	88.3045	55.8149	127.587	29.8395	86.0436
RNF10	6.50276	6.62643	0.973859	0.939121	1.00793	0.886253	0.921861	0.995433	1.01911	1.04063	1.14592	0.986525	1.04174	0.985566	0.820299	1.01105	0.974476	1.09182	0.932111	0.890089	1.0228	0.989603	0.843926	0.977148	57.6021	19.3292	73.2246	70.6721	48.1433	74.4468	73.245	61.6066	53.2998	70.8823	79.6331	85.004	67.4681	72.0316	55.9914	66.2202	102.511	77.2249	93.0051	78.1786	62.8776	84.1785	59.3982	47.2756	111.088
HNRNPH2	7.02634	6.92883	1.01973	1.02511	0.97507	0.956581	1.09171	0.91145	0.994847	0.951449	1.01732	0.955546	1.05426	1.06441	1.05674	1.02985	0.936768	1.00591	0.903362	0.996649	1.04198	0.991234	0.969742	0.997606	95.6644	13.1289	86.8979	73.3139	54.3504	59.1186	139.749	66.7858	62.466	90.4523	117.327	46.5473	81.7796	68.696	54.938	60.3953	81.4713	58.4153	75.7176	69.9525	64.4408	75.5278	88.0313	50.8313	60.6705
LYPLA2	7.15512	7.25287	1.03305	0.989568	0.983598	1.06677	1.13708	1.15278	1.03683	1.20275	1.04923	1.14167	1.13752	1.06536	1.08777	1.01509	1.0631	1.03814	1.06514	1.13166	1.02117	1.09063	1.02903	1.07324	54.852	12.71	66.2714	95.8668	43.2829	73.0491	83.7084	58.5867	114.899	62.013	88.7237	23.3005	68.2437	45.797	52.3304	47.7493	97.082	65.63	76.0095	40.3198	111.564	86.1902	81.1208	54.4645	43.7535
HSF1	5.86653	5.966	1.03323	0.987744	1.01342	1.04974	1.01906	0.989516	1.03886	1.0073	1.15156	1.07952	1.31962	1.14527	1.16283	1.0034	1.10763	1.24444	0.992584	1.07479	1.15569	0.95252	0.852302	1.06576	72.0045	19.3805	116.364	61.7442	208.463	36.4308	91.5703	35.6526	110.951	49.2855	73.2823	53.8994	71.0422	30.2193	29.0575	32.1844	57.6779	50.0475	125.542	37.031	103.649	60.2297	72.1516	36.4753	118.955
FXR1	7.98503	8.00099	1.05976	0.938399	1.06092	0.98652	0.748652	1.02743	0.98642	1.02051	1.04064	0.949736	0.979519	0.966172	0.932633	1.01772	0.967654	1.01595	0.956523	0.974234	1.00173	1.02121	1.01564	0.98419	78.167	15.0736	80.9906	46.4355	113.408	27.9783	64.464	36.6546	57.3753	55.3514	90.3195	150.593	40.9623	30.4843	19.8232	33.9372	63.2633	58.5527	92.7401	58.1908	60.4837	41.5061	175.529	21.3559	127.476
NARS	9.85563	9.14067	0.95853	0.995003	1.03182	0.975605	0.951023	1.02484	0.924269	1.03333	0.982146	1.01347	0.929699	0.988699	0.948981	1.00981	0.956524	0.997903	1.02609	1.02284	0.968463	1.00733	0.839206	0.980266	55.8958	19.4184	73.6071	83.9688	52.6609	65.2082	80.5832	54.5667	94.3348	82.2766	129.106	65.169	65.6966	64.1017	53.0473	71.8784	103.58	64.9691	88.6034	59.3106	57.6884	126.048	65.638	49.9621	117.451
NCSTN	9.19182	9.56909	1.04764	1.01969	1.03054	1.04104	1.07862	1.0856	1.02556	1.00169	1.01195	1.12478	0.93749	1.02645	1.03523	0.968774	1.02742	1.12563	1.19074	1.05251	0.999075	1.08154	1.03073	1.04489	89.9503	30.8166	115.342	58.3503	94.9502	41.7066	201.878	46.2473	82.1574	73.9337	90.2	43.4744	79.0544	36.4226	45.1465	60.675	58.7097	47.6194	80.7081	34.262	74.9127	55.0969	126.869	26.3299	75.3507
TIMP3	7.70773	6.75054	1.134	0.753163	1.00813	1.00213	0.628494	0.951895	0.85614	0.88425	0.902037	0.934538	0.593357	0.915694	0.897615	0.960432	0.598426	0.962063	1.06622	0.847271	1.0268	0.904913	0.698172	0.882178	48.6473	29.0803	281.815	28.9352	176.937	12.5409	9.73071	37.8121	25.6047	143.797	52.6251	155.377	90.002	14.3217	4.51319	66.1789	21.0235	16.7213	120.648	35.3278	11.6661	11.8567	155.326	5.34378	46.8182
HCFC1R1	8.1359	8.25019	1.05915	0.935837	1.0331	0.998067	0.769913	1.14074	1.01523	1.00641	0.958671	0.98847	0.985384	1.12077	0.975571	1.02675	1.00593	0.993047	0.89683	0.892467	0.932541	1.01243	0.804681	0.978666	123.415	13.7813	227.801	40.0318	100.189	29.847	29.4845	39.0931	46.6474	63.1211	62.4009	87.4825	90.8482	28.0571	36.3096	39.0911	155.343	40.0526	95.7741	49.2068	107.843	30.8737	69.1791	33.4005	37.9934
GPAA1	7.28952	6.84508	0.9194	0.951145	0.97355	0.950505	0.976347	1.05884	0.956269	0.966144	1.03512	0.969997	1.20943	1.04518	1.07488	1.03329	0.924128	1.13613	0.952689	1.0925	0.992658	0.936783	0.886451	1.00197	91.0185	28.4568	66.0283	56.7023	158.702	56.3385	179.816	65.9329	81.1751	77.6968	70.4444	48.6313	79.5948	35.0254	54.7147	55.4078	31.4272	48.8892	79.1911	37.4567	59.7903	59.596	82.7298	37.7353	47.2201
SNRNP200	6.72531	6.55373	0.961236	0.957454	1.02055	0.939443	0.850036	1.00857	0.917672	0.996153	0.87401	1.05542	1.11507	0.925603	0.869767	0.950397	0.974723	0.934595	0.897595	0.875443	0.98208	1.02604	0.934761	0.955553	102.961	18.9112	80.0427	73.3567	73.573	52.19	185.097	52.1896	54.413	73.5813	118.894	40.4016	68.4511	41.0418	46.7151	64.5015	70.0206	47.7223	103.948	47.5382	89.1763	70.4879	121.498	30.6573	164.772
U2AF2	8.6124	8.71908	0.997345	1.04845	0.971401	1.05211	1.08288	1.0214	1.00127	1.01599	0.973845	1.10083	0.953255	1.07359	1.07755	0.978396	1.05503	1.1015	1.0241	1.05223	0.996933	1.01138	0.811822	1.01911	68.934	11.7383	97.4993	65.4839	61.6827	53.0033	97.0107	61.0222	79.7901	80.4835	109.191	21.5554	81.8525	49.3838	56.4381	58.4245	81.1797	57.7501	125.216	45.6816	86.4178	81.9861	146.066	49.4667	72.8802
ASPH	6.0997	6.10275	0.996778	0.94809	1.04519	0.902403	0.887314	1.01028	1.01107	0.805763	0.976998	0.943812	1.25223	0.995125	0.90524	1.03349	1.05153	1.17307	0.931724	0.827826	1.01306	1.07447	0.768903	0.978779	104.629	32.6007	125.144	45.058	189.845	37.1018	58.6255	41.1401	54.2035	86.7668	73.4913	63.7466	55.8904	46.7094	84.2729	50.7355	32.8142	33.8422	95.1845	36.9868	58.8864	45.0393	106.312	38.8579	62.2181
PMVK	7.59374	7.3697	0.925591	0.936891	0.949133	0.952862	0.99652	0.945349	1.03144	1.01021	1.12757	0.904778	0.840372	1.0441	0.927342	1.05848	0.941769	0.883359	0.891755	0.96567	0.971774	0.988531	0.946835	0.963826	83.7453	12.3664	56.2737	44.6425	102.15	74.5318	167.574	84.5986	74.986	154.025	69.4661	30.8598	61.5801	63.4715	60.2509	45.6606	63.3081	48.4823	38.6314	66.7015	76.423	87.0728	69.5258	81.5615	61.0205
STAP2	6.34747	6.46615	0.92708	0.923583	0.898996	0.953471	1.12618	1.04974	1.02495	0.878276	0.950667	0.9874	0.834083	1.03822	1.22354	1.00549	1.05716	1.00909	0.851847	1.05191	0.953855	1.07105	1.07855	0.995007	62.3627	14.3283	43.9	88.0448	70.1431	71.4798	170.537	77.848	92.3508	88.5765	116.885	8.81609	53.6156	81.4241	78.5264	58.7829	65.1354	83.5619	54.1572	68.8186	133.577	84.3514	37.0666	78.9156	89.2744
DUS1L	6.82356	6.89878	0.940678	0.99508	0.975847	1.00314	0.977942	1.08591	0.965362	1.41736	1.12208	1.00622	0.765442	0.991222	1.02149	0.994868	1.16855	1.21059	1.19066	0.922354	1.02402	0.74009	0.841176	1.01715	85.6996	27.2177	66.7436	82.3188	76.1961	66.4319	129.646	74.2764	78.7797	76.2951	78.6162	39.0776	58.8865	40.9419	56.7316	62.9818	101.018	51.9404	66.2211	51.331	84.4437	100.222	57.289	63.2198	54.2451
KIAA0174	9.63568	9.25068	1.04654	1.00816	0.987474	1.03274	1.03826	1.05265	0.995063	1.08613	0.982433	1.07919	1.04417	1.03445	0.999118	0.98148	0.988691	1.04318	0.994328	0.975579	0.977228	1.00126	0.79051	1.0066	80.5585	22.1025	101.732	82.9768	54.929	53.2838	79.5768	43.9586	78.2352	75.9938	117.77	42.9786	81.1425	60.4451	41.9982	59.1503	83.4419	60.9333	76.5948	52.8416	100.401	76.3673	82.184	33.2383	78.0971
PRPF8	7.25139	7.18874	0.939382	1.02034	1.02904	0.953118	0.934453	0.987471	0.945288	1.25814	1.04254	1.22773	1.17219	1.03759	1.0091	0.96815	0.970683	1.15887	1.07678	0.956015	1.00814	0.839641	0.701646	1.01125	81.0184	13.8305	87.7946	77.9899	86.3815	66.6967	91.4699	53.6646	59.0003	81.7383	136.03	53.8658	75.7749	49.6118	60.4594	84.3448	87.3458	52.8538	109.026	55.1194	100.981	95.8062	54.468	36.1016	156.836
EMD	9.34331	8.99354	1.00073	0.959226	0.96813	0.981536	0.976304	1.05686	0.985656	1.05163	0.987514	1.01293	1.06311	0.997919	0.938845	1.00436	0.960666	0.969819	1.0068	0.957855	0.988956	0.973875	0.928539	0.989108	104.041	18.4265	74.1796	63.7455	171.748	47.6884	176.687	62.0327	52.8227	71.0698	86.6294	44.1588	52.9787	49.4668	40.0739	46.9949	84.3807	56.7113	78.0629	51.7555	85.0713	55.3121	76.1274	60.9933	104.141
NME2P1	5.86021	5.69054	0.970685	1.0069	0.987228	1.01335	0.984637	1.00825	0.998683	0.872068	1.00775	0.958478	1.00518	0.991383	1.01527	1.00654	0.952498	1.00905	1.00523	1.04211	1.02702	0.989436	0.999032	0.992894	93.5157	22.1149	66.35	47.3615	90.9197	43.8425	83.9044	54.1691	113.482	62.8147	56.0729	36.5238	53.7851	55.3165	46.4382	48.1775	98.7811	58.4767	78.116	65.0297	79.5191	64.3384	56.9578	54.0108	186.808
CLPP	7.42105	7.37829	0.94479	0.953949	0.979259	1.04962	0.912455	1.04331	0.946551	0.993915	1.11329	0.934374	0.99488	1.00151	0.981893	1.01455	0.920394	0.927193	1.04573	0.927417	0.997837	0.885212	0.788423	0.96936	57.2362	20.0954	83.6778	64.3799	86.1098	61.8185	109.729	62.1764	95.399	73.4287	75.5722	54.7997	58.3838	52.9675	51.4655	52.1703	52.2441	68.3833	63.9735	64.5469	130.187	74.2413	37.9814	62.0719	135.035
PTOV1	9.24678	8.97132	1.01879	0.979197	1.02452	0.998944	0.902488	1.01632	0.995803	1.01316	0.868576	1.02168	0.99939	1.00177	1.00501	0.945037	1.03479	1.0406	0.946062	0.939831	0.984277	0.999947	0.744433	0.975268	64.0192	24.8075	92.7854	85.1515	118.401	52.1862	44.5885	40.6019	80.0143	89.5852	99.5851	66.3137	82.4795	38.6683	49.2029	50.373	68.78	65.305	73.5574	49.0506	54.822	56.0294	101.888	42.8285	85.5535
C19orf70	9.7514	9.42386	0.935324	0.908439	1.06036	0.923617	0.873604	0.968543	1.04388	1.00808	0.954605	0.930306	0.881118	1.0191	0.930842	1.01995	1.00029	1.00337	0.959331	0.925882	0.997091	1.01766	0.895201	0.964599	50.4742	21.0773	86.652	64.5968	75.6231	58.3664	265.175	64.1153	63.0483	75.5304	57.8923	96.5861	50.1816	49.5307	46.6228	42.5725	55.2525	58.9274	73.6063	64.8701	105.784	71.6929	41.543	60.7555	62.776
RTN3	7.32534	7.45389	0.98791	1.00535	1.00403	1.00632	0.986814	1.03468	1.00777	1.00123	0.996749	1.03319	1.10437	0.926053	0.982173	1.00211	0.957451	0.997104	1.01665	0.983815	0.998598	0.974483	0.978925	0.999323	110.916	48.2765	82.9105	81.9405	89.7255	51.9774	59.5	42.2445	60.4095	147.434	72.8144	46.2488	55.0793	54.5508	51.7416	69.605	131.964	45.6477	64.5134	58.6537	142.042	51.3116	70.0256	32.1325	79.3903
DNAJB11	6.66758	7.14558	1.05249	1.10088	1.0395	1.11137	1.20522	1.07488	1.07357	1.41938	1.18196	1.16345	1.40054	1.10531	1.05769	1.03622	1.05299	0.982141	1.04349	1.21055	1.06134	0.686706	0.815247	1.08928	132.734	12.5678	113.537	51.2937	80.7225	38.7488	95.3135	39.1413	62.4522	45.5438	115.858	17.9995	55.1004	34.8857	31.623	39.1442	81.8307	61.7862	71.013	38.2703	136.954	57.7608	230.155	36.9287	118.376
RDBP	7.25394	7.05451	1.04623	1.06175	0.985218	0.942514	1.08422	1.03228	1.09702	1.11913	0.957378	1.16244	1.08498	1.17448	1.17444	1.00714	1.05921	0.97014	1.01746	1.04893	1.0168	1.00686	0.76724	1.03885	93.2876	16.8916	93.1125	77.732	75.141	46.7481	110.279	53.6323	80.2823	66.4302	105.412	35.6449	55.7523	46.064	46.8332	52.6536	95.4078	46.2431	121.377	46.8538	61.7025	63.6384	88.7463	56.141	66.1395
PINK1	7.89029	7.56892	1.0631	0.83526	0.95838	0.806304	0.757647	0.982732	0.967601	0.847369	1.04386	0.916641	0.915919	0.971356	0.841412	1.03496	0.838991	0.981439	0.943689	0.934574	1.00717	0.985262	0.759214	0.923471	33.5848	30.692	71.46	38.6138	42.3738	66.3837	49.4642	63.8041	55.3831	69.9931	42.6603	258.246	63.0516	52.0559	47.8039	63.1625	47.2478	62.7943	56.9211	105.547	63.2074	48.2512	88.3487	41.6484	50.7709
NAMPT	6.6694	6.8296	1.02923	1.08839	1.05009	1.15874	1.22053	0.84577	1.07283	0.944124	0.923433	0.91202	0.974404	1.05925	0.998679	0.997249	0.972653	1.03658	0.913116	1.05098	0.909565	0.986171	1.09131	1.0112	307.252	6.24559	69.4193	51.5806	373.842	85.9558	67.6202	60.4783	48.8985	132.855	92.3149	16.4856	23.013	85.0396	210.337	43.3421	27.9503	100.477	67.644	28.9023	18.5296	86.3996	52.8085	43.086	135.141
DAP	7.07656	7.61391	1.20354	1.06269	1.03952	1.13017	1.10011	1.02866	1.08754	1.06482	1.03489	0.943548	1.00121	1.01938	1.11837	1.00348	0.88054	0.960009	1.08834	1.25505	1.04468	0.991061	0.786536	1.0402	104.029	55.9719	117.27	104.343	74.4782	35.4416	71.7653	38.5224	54.7899	64.8248	135.989	54.2369	76.9644	24.812	40.9801	68.4113	81.2546	29.3222	146.674	29.5198	183.727	36.1865	119.658	22.8884	50.9765
TK1	6.29998	7.20054	1.04079	1.18089	0.956262	1.22434	1.30742	1.10459	1.17739	1.53989	1.12738	1.18775	0.94962	1.23412	1.32963	1.1331	0.905213	0.917625	1.3945	1.6785	1.07317	1.06394	1.59598	1.19629	172.964	1.64516	74.144	24.5254	45.6273	27.7098	156.916	33.4062	71.2206	30.5124	103.687	2.69369	63.1967	31.9862	24.7793	29.6886	129.352	30.6082	152.155	27.59	138.561	33.9653	174.086	16.8994	29.8829
C22orf28	8.47287	7.97009	0.970635	1.02906	0.97812	1.02787	1.10175	0.93263	1.00414	0.998465	0.993472	1.05127	0.770628	1.02103	1.06057	1.03378	0.989856	0.92184	1.05823	1.1133	1.0047	0.98654	1.02239	1.00335	83.2772	17.5636	91.9059	63.2478	79.1767	80.3911	63.9233	65.5381	67.7322	84.7305	121.112	35.6755	78.6233	66.2077	52.1345	65.3506	64.4434	58.2887	77.8921	65.2399	102.92	78.6278	102.157	61.0096	67.1544
STARD10	8.56412	7.72454	0.967789	0.928459	0.940202	0.934564	1.05448	1.07823	1.06989	1.1245	1.23646	0.98708	1.11096	1.07166	1.0321	0.992972	0.893036	1.0353	1.05054	1.04494	1.0719	1.01454	0.832319	1.02247	99.4733	45.7654	82.8347	86.1795	38.572	39.12	101.795	41.8693	66.6183	55.8504	52.845	44.8278	73.5584	32.0182	56.6503	74.1808	114.364	47.958	87.6926	41.8424	189.016	31.4024	88.5969	55.1886	67.6578
C19orf24	6.63594	6.96484	0.98486	0.990523	0.983181	1.06983	1.07668	1.06922	0.992289	0.97147	0.955538	1.00983	0.933295	1.06296	1.11154	0.99262	0.979546	0.912313	0.989715	1.10383	1.01697	1.02603	0.877454	1.00522	69.8978	18.5675	88.4025	66.6488	111.636	55.1939	45.9629	43.2031	98.4766	77.0963	71.3666	20.685	57.6556	34.2911	57.0465	54.9157	59.1333	71.4173	72.4216	47.6717	136.722	85.6743	39.3979	50.9912	95.5742
PPT1	9.65277	9.96302	1.03809	1.09358	1.03508	1.15374	1.05052	1.03766	1.00687	1.06927	1.01429	1.04055	0.938698	0.996359	1.01742	1.02956	0.92072	0.863288	1.1259	1.09987	1.0172	1.02634	0.907256	1.02296	178.868	24.1903	139.637	28.8479	48.7031	24.8362	77.7702	39.5068	92.2931	78.2031	122.834	33.203	81.0795	31.6286	28.7005	50.5327	100.076	25.9023	87.3947	42.1326	141.347	45.6145	137.534	27.6984	64.4848
DDX24	8.71816	8.7884	0.990687	1.00806	1.0476	1.02814	0.948739	0.980195	1.00865	0.962008	1.04541	0.921751	1.06311	1.00255	0.953074	1.00925	1.06657	0.946402	0.93886	0.938514	0.996911	0.910085	0.980314	0.987947	90.2241	16.5527	142.707	98.9454	55.9535	45.2924	84.9704	54.6692	73.501	65.1638	111.048	50.4818	85.6213	51.0176	39.3652	65.4419	76.1449	66.2744	81.5758	52.4137	115.711	55.8024	108.829	38.9559	62.5035
TST	8.1552	7.39879	0.856824	0.996719	0.896374	0.997435	1.14791	1.00548	0.958597	1.06418	1.02537	1.06675	0.897108	0.875823	0.84885	0.96684	1.07484	0.780324	0.925825	0.904166	0.845007	0.73555	0.745188	0.934055	166.109	20.2142	91.8216	97.0867	28.6302	120.623	58.6829	114.831	69.7176	104.152	61.0202	35.8956	54.622	82.2107	102.773	80.8061	44.3664	53.2139	12.4266	57.3228	113.179	109.043	56.4111	66.9664	44.7087
VCL	8.99973	9.01673	1.00153	1.02555	1.0699	1.0531	0.983445	1.09801	0.990054	1.01448	0.953211	1.0567	0.934506	1.02199	0.99835	1.00626	0.981993	1.01712	1.07667	0.990683	1.02726	0.979763	0.957484	1.01134	81.3768	12.585	148.99	35.5806	73.9907	40.3505	77.9232	44.6673	87.641	70.3641	193.895	46.4335	80.4964	54.6346	44.0101	54.9377	106.76	53.1387	109.593	62.6753	138.5	95.5015	82.7956	17.5737	39.1874
ALDH9A1	11.4996	9.94474	0.830772	0.877276	0.972809	0.855343	0.912801	0.955076	0.970844	1.02087	0.936335	1.00751	0.790993	0.918956	0.973959	1.00984	0.953297	0.942129	1.03453	1.01804	0.976056	0.977807	0.949561	0.946895	60.659	37.7711	43.6792	57.682	66.3924	132.348	69.0591	109.259	105.188	126.309	137.702	65.9451	54.4811	153.242	118.904	102.095	25.452	127.237	42.021	99.2825	46.954	115.77	38.9857	80.608	53.7624
TRAPPC2L	9.34068	8.95502	1.01201	1.00647	1.01023	0.949026	0.974446	1.10482	1.05121	0.998909	0.956488	1.04174	0.996838	0.994217	1.0487	0.956841	0.965868	0.960399	0.964881	0.950449	1.01547	1.02608	1.01114	0.999821	79.1493	25.9161	91.8702	59.2897	70.4838	61.7749	99.3343	69.6691	89.5395	97.1261	59.6386	52.7523	66.2092	48.5933	43.7395	55.3935	95.9195	48.1422	71.0585	53.0485	142.846	62.0948	88.2831	69.7559	70.0071
STK24	8.94371	9.30422	0.992603	0.900215	0.911623	0.958057	1.10469	0.982256	0.964628	0.979485	0.978835	0.981936	0.985015	1.03925	1.04009	1.01073	1.00464	0.981504	0.971409	1.01339	0.950605	0.978815	0.857282	0.980336	99.2611	9.2713	102.214	74.311	112.521	94.9198	56.2071	54.9477	64.0358	68.4162	130.24	18.2915	62.5706	88.8061	58.4295	59.0103	167.369	64.1948	107.201	58.3487	91.9312	101.134	148.749	54.236	61.7822
PLOD1	8.35757	9.77329	1.17379	1.16365	1.17732	1.22427	1.06177	1.30541	1.14867	1.04016	0.992281	1.11298	0.984133	1.05999	1.04817	0.993437	1.03793	1.06796	1.01396	1.03472	1.10208	1.01636	0.838425	1.07607	78.5804	26.9921	174.966	19.3636	73.6126	20.8313	63.098	23.0709	87.8661	57.9193	62.5524	34.2565	106.438	15.4981	18.3361	31.4909	135.959	31.983	157.167	14.1052	218.667	28.3201	242.454	13.9861	59.8251
CES2	8.30286	8.43226	0.926344	0.783661	0.837659	0.844284	1.0465	0.945201	0.936546	0.969024	0.93245	0.987047	0.841352	1.09631	1.00189	0.99765	0.973848	0.959591	0.99685	0.999139	0.974833	0.95307	1.0364	0.954269	16.285	6.03817	65.2696	47.3628	20.641	124.018	30.098	124.494	83.5408	36.9616	37.912	14.7104	40.5736	157.716	77.0322	39.7503	245.458	82.2655	54.3147	81.9102	18.49	155.903	125.439	107.02	56.5311
CLIP1	8.68177	8.48899	0.921679	0.956724	1.03721	0.935398	0.92388	0.967642	1.00821	0.975878	1.03717	0.954228	1.00021	1.02645	0.978529	1.01856	0.928767	0.998992	0.992116	0.973156	0.969661	1.00317	0.910563	0.977057	68.4633	10.5453	53.0547	63.6022	24.8062	84.612	80.3226	58.4918	61.0882	80.212	94.6094	69.9595	70.1655	102.968	73.7218	69.3882	92.5484	85.757	83.1526	73.0958	55.0925	107.723	121.918	60.7567	64.975
LTA4H	9.95576	8.49158	0.922892	0.98194	0.96993	0.892044	0.947043	0.895176	0.936543	0.966552	1.08767	0.951053	1.03901	1.05748	1.01155	0.986917	1.02826	0.961653	0.929358	1.03307	0.928538	0.958156	0.829041	0.967328	93.567	12.5247	72.0512	54.8352	43.3215	121.497	60.3605	92.3052	230.566	73.6699	85.2904	26.3439	85.238	100.857	63.5394	74.4401	103.265	87.6041	67.7982	49.966	39.7979	169.242	75.1385	44.248	101.795
COMMD4	7.818	8.0019	1.0529	0.999164	0.996012	1.08303	1.06695	1.10662	1.08252	0.96284	1.05337	1.15068	1.01665	1.03988	1.06003	0.97112	0.916355	0.981436	1.06686	0.971827	1.06785	1.09248	1.11972	1.04087	91.3145	16.5751	95.6258	56.7589	80.7151	46.677	168.573	56.4018	93.1258	75.7356	145.255	34.6142	74.783	35.5252	48.3458	44.5321	73.3733	39.356	85.3393	36.7695	46.6366	49.4566	92.8083	36.4307	60.6893
RAP1B	6.39565	6.88669	1.12823	1.10432	1.05117	1.21035	1.08653	1.1085	1.07678	1.04777	1.025	0.98512	0.97394	1.11248	1.1037	1.0112	0.940892	1.04964	1.0278	1.18202	1.0466	1.00888	1.0216	1.06202	70.1365	11.1472	116.634	53.4544	153.581	32.9205	39.9842	35.4255	93.4911	65.439	130.082	22.8543	84.5093	41.1684	33.1429	52.0782	74.9933	43.9992	119.4	33.1378	48.4513	55.0977	62.6018	43.8679	106.2
MAGED1	8.25174	7.74705	1.1102	1.11434	1.11874	1.02358	1.04097	0.99317	1.02581	1.04149	1.10273	1.15215	0.741903	0.942508	1.07279	1.03547	1.09232	1.10151	0.985679	1.10467	1.07092	1.11475	1.0511	1.04937	149.58	41.5541	162.52	79.6928	145.09	35.3943	28.7821	32.8414	4.60327	81.2488	112.932	75.6042	106.365	25.569	18.2084	68.9079	36.9855	31.2187	39.6224	45.9202	194.981	30.5961	169.019	27.4478	127.7
CKS2	6.94186	8.07266	0.970175	1.2213	0.961309	1.30966	1.29342	1.01114	1.10479	1.08711	1.28549	0.962361	1.09359	1.11357	1.17734	1.04274	0.987437	0.98023	1.10033	1.24814	1.0288	1.02121	1.15737	1.10274	111.51	0.813778	61.8371	23.6877	65.2986	45.5925	104.158	34.2025	155.188	50.2565	129.103	4.79533	60.6992	47.3585	41.8197	44.4967	209.627	56.3992	102.879	54.079	135.603	75.4002	100.198	44.6421	145.997
DEK	8.59584	8.79906	0.989109	1.01411	0.99428	1.01806	1.02971	0.906098	0.993499	1.01457	1.02358	0.958707	0.821403	1.02969	1.02059	1.05253	0.931001	1.0139	1.10423	1.08741	1.01563	1.00747	1.03727	1.00299	127.272	9.54955	69.5461	40.1375	72.1231	34.2221	94.0034	40.2047	81.9575	66.076	262.878	31.2489	61.7374	49.9158	36.2538	55.9558	144.408	37.4082	149.285	41.0271	64.8173	59.9816	135.441	24.234	62.2462
MRPL4	6.67903	6.22906	0.888748	0.969724	1.00109	0.995616	0.962537	1.02468	0.962944	0.957484	1.01924	0.975691	0.960228	1.02976	0.956162	1.03705	1.04939	1.05659	0.932246	0.932177	1.01907	0.996716	1.09025	0.991304	145.308	13.4924	69.8815	60.207	113.603	62.7401	142.619	61.4208	83.956	84.1933	81.3853	49.407	49.4507	46.4909	51.3458	49.8085	75.4986	65.2688	68.8644	41.0517	135.88	90.8408	60.4821	63.9007	130.808
WBP5	9.0424	9.58443	1.07157	1.10715	1.04326	1.05075	1.15092	1.19398	1.02758	1.01293	1.00217	0.99217	0.877836	1.11981	1.06376	1.05233	0.959455	1.01817	1.03219	1.1003	1.08099	1.01188	1.02063	1.04714	127.528	10.9709	111.221	37.1738	78.931	42.7664	168.21	46.3772	94.9341	81.971	127.951	26.0342	66.5676	35.9476	69.4726	59.0737	132.317	26.3412	106.295	42.8368	132.874	40.3854	91.6602	58.2954	75.1891
G3BP1	7.1056	7.60988	0.924404	1.07039	1.00359	1.05805	1.02651	1.0892	1.05174	0.976799	1.09091	0.979846	0.717913	1.06005	1.03904	1.05776	0.975323	1.00627	1.02781	1.0153	1.00127	1.02421	0.962517	1.00757	60.4924	5.84968	95.6756	51.2169	64.4645	45.4169	67.2895	41.2388	109.048	67.0072	121.945	35.0946	83.0992	64.3582	54.3787	63.1735	69.4771	67.1431	81.7503	53.4282	90.1056	126.055	133	48.6145	111.399
PSMB9	6.2865	6.55643	0.883856	1.24435	1.00352	1.05469	1.17543	0.952854	1.03638	1.02976	1.08599	1.06192	1.17731	1.02285	1.14544	1.11892	0.961368	1.0133	1.11608	1.05011	1.02344	1.17162	1.12869	1.06942	59.0164	5.0547	125.507	113.713	15.0353	16.2123	183.286	29.2974	295.825	31.7712	229.535	12.091	221.883	29.644	109.555	74.4863	45.5565	53.4035	168.013	52.3324	32.4233	11.3039	111.919	9.54883	11.1632
TFRC	6.15548	6.73825	0.99933	1.13494	1.1381	1.33193	1.05799	1.1377	1.06854	1.59507	1.37084	1.04551	1.57864	1.14128	1.06816	1.03453	0.731146	1.32088	1.22073	1.21897	1.00309	0.778447	0.989985	1.14123	338.132	4.07356	62.3741	16.0198	157.758	20.9484	64.082	20.8475	56.7669	55.6336	84.7876	5.55171	21.3209	27.2198	48.7972	58.7699	135.656	64.8385	86.1168	11.0507	120.844	14.6511	263.215	13.8564	355.097
GSTM3	7.21485	6.16164	0.856063	0.795859	1.04184	0.970643	0.754777	0.878227	0.821642	0.938384	0.814668	0.860952	0.707681	0.902994	0.813425	0.939676	0.932016	0.865507	0.742122	0.767209	0.851816	0.955272	0.855474	0.860298	434.563	4.69459	20.1645	13.9917	169.183	63.6586	5.55325	27.5861	0.853292	23.4568	15.5838	31.7392	6.62598	6.82392	334.658	37.1625	1.07996	2.4421	2.41637	11.546	119	50.1151	44.7644	26.3803	345.576
ZDHHC12	6.80863	7.10991	0.996311	0.984447	0.921774	1.07567	1.20367	1.09488	1.03679	1.02188	1.0386	1.09722	0.946909	1.11482	1.27768	0.947769	1.04238	0.959195	1.12987	1.25329	1.02128	1.0088	1.03342	1.05746	105.173	16.7603	76.2341	51.9786	78.3568	57.3773	90.7311	61.27	113.439	43.6363	93.5105	17.8449	83.0236	44.2019	61.2445	48.5457	142.501	44.7165	84.9279	49.4128	119.898	55.727	72.6889	34.2538	93.9216
NOTCH3	8.70019	8.55761	0.947526	0.879736	1.08867	1.07531	0.95577	1.14358	0.943677	0.966662	0.877158	1.02589	0.810569	1.04308	1.01684	1.00672	0.986798	1.04225	0.983764	0.972881	0.949666	1.00671	0.752856	0.975054	307.566	2.45559	100.118	32.5339	253.28	63.472	204.093	59.7013	34.0933	73.555	96.236	21.6883	78.4073	46.4164	77.1903	56.8009	48.0175	50.3196	24.3751	47.5386	51.4637	101.045	287.379	42.9653	79.4278
TSC22D3	8.51937	7.93337	0.981266	0.942539	1.02967	0.951195	0.862029	0.898828	0.884914	0.931161	0.915809	0.916671	1.05012	0.914932	0.893068	0.94608	1.02149	1.01763	0.921656	0.939193	0.937607	1.02566	0.80094	0.942022	56.7078	43.0716	90.6327	68.0944	86.6739	44.3625	57.2186	54.6107	18.4099	53.1221	69.875	45.6338	81.8654	30.9791	12.998	36.6251	106.388	62.6789	153.5	70.3675	45.7957	37.7356	42.8567	11.3411	95.3915
TRAP1	6.57215	6.37681	0.928766	0.969597	1.02039	0.963996	0.828685	1.01211	0.922083	0.70104	1.32951	0.966082	0.773494	1.03201	0.86253	1.02111	0.947163	1.22583	1.06677	0.867846	0.954311	0.952747	0.809865	0.959806	119.969	12.5528	49.8611	73.9189	91.3192	70.0229	65.812	55.0697	64.5588	69.7347	88.6089	81.3589	41.301	58.4597	41.6116	51.1952	91.7459	60.2623	70.6291	59.1901	115.853	105.929	82.0891	53.377	113.654
FLNB	6.95807	7.3224	0.857564	1.04535	1.02907	1.06395	1.00508	1.05798	1.0797	1.43419	1.05971	1.22464	0.654495	1.09332	1.05879	1.01889	1.24991	1.03683	1.09619	1.09134	1.20106	0.99241	0.94757	1.06181	78.0719	13.6862	73.1168	93.3966	80.015	48.3682	32.561	29.5908	113.653	86.3313	109.593	20.7003	167.939	27.9646	57.0139	88.3579	80.4644	29.8217	185.133	25.5129	88.9924	102.822	79.8286	41.632	28.4531
LAPTM5	7.08121	8.44159	1.2409	1.26581	1.12975	1.26227	1.17758	0.838272	1.01138	1.13059	0.883521	0.996964	1.10839	0.911009	1.03626	0.979894	1.02695	0.921785	1.06644	1.23071	1.00428	1.09364	1.05997	1.06554	393.369	9.69125	249.041	32.549	59.5845	37.4073	71.428	88.3573	209.217	70.6797	176.478	23.2512	264.154	37.7346	52.5192	68.3002	7.15844	25.0842	86.3431	50.3723	61.3113	45.3775	99.5501	18.5174	34.1928
HMOX2	6.12918	6.14956	1.00225	1.00056	0.998563	1.04915	1.02217	1.10341	1.02059	1.18088	1.18627	1.05886	1.02128	1.06985	1.0353	1.01731	1.03652	1.01496	0.953928	1.06263	0.996141	1.07243	0.899319	1.03821	96.4708	9.11336	77.7436	37.1006	64.0702	88.7362	30.9617	61.0721	92.9279	51.5256	51.1075	17.4545	64.244	75.7027	62.6895	78.3987	95.3477	57.3144	73.4623	62.3581	106.969	81.4518	59.1784	65.0774	61.5961
AQP1	6.70085	6.24073	0.896501	0.926344	1.01671	0.889676	0.896122	0.942987	0.934082	0.772458	0.994865	0.968595	0.709062	0.905046	0.854121	1.03037	0.742524	1.01789	1.02837	0.801505	0.998948	0.914612	0.748259	0.90424	24.0486	39.3629	163.107	28.1775	42.8133	68.0168	31.6896	191.126	13.6719	288.367	109.566	245.468	138.931	36.2576	29.2719	196.006	40.0221	49.53	86.1069	92.4785	24.4186	40.1879	32.5603	26.5651	26.483
ITGB6	5.69714	6.04027	1.08162	1.17447	0.994282	1.10203	1.12553	1.02898	1.11652	0.966103	1.11749	1.13696	0.670577	1.06328	1.15193	1.10655	1.09048	1.14722	1.17824	1.04908	1.17727	1.03302	0.585935	1.05227	81.8912	0.838105	187.766	24.5047	101.78	24.6775	23.2743	12.9313	261.963	20.9278	203.56	24.0817	95.6509	33.7667	18.25	21.0071	35.6852	35.5673	187.864	17.8539	146.002	44.5454	179.145	13.735	3.41097
ZFP36L2	7.1855	7.10864	1.0746	1.00077	0.9453	0.980879	1.28155	0.776014	1.03452	0.983725	0.914836	0.986748	0.827057	1.05392	1.02993	1.00342	0.99555	0.999175	1.02957	1.06979	1.00848	1.00314	0.84186	0.99242	77.2827	7.97028	110.542	69.4751	52.3352	75.5152	41.953	81.9173	77.2636	228.274	109.031	35.9774	85.2322	59.8619	30.5768	65.3793	92.6176	62.6674	133.939	46.1611	146.358	56.4864	44.063	53.6483	15.0139
RPL7	8.97067	8.34744	0.914599	0.94048	0.945397	0.935942	0.988221	0.943394	0.952998	0.993291	1.06435	0.884434	1.04984	0.994963	1.00886	1.01389	0.98569	0.968327	0.868193	0.96238	0.972779	1.02118	0.815097	0.963062	36.2779	21.8291	62.1536	52.6154	79.3521	63.0897	68.3353	79.5099	56.8941	127.723	66.2736	55.4731	39.787	92.9729	31.4727	70.6726	50.3863	60.9208	79.3262	50.6049	69.8743	95.0306	88.18	72.9755	162.067
YKT6	5.73836	5.91086	0.997148	1.00789	0.946849	1.08464	1.02852	1.02908	1.03539	1.02544	1.06331	0.981065	0.990604	0.99765	0.997582	1.00732	0.965215	1.0419	1.02282	1.01034	1.02031	1.03282	0.956485	1.01154	79.953	17.3802	75.0619	39.7534	105.775	59.6273	117.403	53.3768	88.9479	59.5968	87.0347	22.8979	68.876	43.9864	53.6799	61.6744	121.371	50.7565	104.484	42.668	162.908	72.061	96.757	46.3296	107.767
XPO1	8.98835	8.9632	1.0222	1.03175	1.01819	1.07025	0.97348	0.951382	0.997202	1.02647	1.17697	0.913943	0.959469	1.0092	1.01636	0.992653	0.954954	0.952366	1.09668	1.0504	1.00284	0.983196	0.842505	1.00202	100.698	6.03508	64.8497	56.868	73.2642	44.9836	88.135	44.5361	94.8	83.5209	168.358	32.2134	59.7068	55.9811	40.6821	53.0397	121.281	53.4007	91.7007	45.5394	86.3637	76.5838	105.06	31.0319	109.93
NET1	8.52094	8.8116	0.918042	1.01287	0.972164	1.05869	1.04224	0.991115	1.0018	0.994585	0.991156	0.935535	0.912593	1.06474	1.02504	0.975428	1.00817	0.98292	0.914246	1.11965	0.972881	0.999809	1.02452	0.996104	77.5935	26.7935	92.5618	68.3369	114.757	80.5334	79.9852	84.9899	114.962	78.6772	153.985	26.33	87.3552	77.2396	43.0305	59.6512	97.1029	60.938	149.179	35.1793	93.4176	114.795	46.1976	44.4575	51.5399
ADAR	8.05339	8.58004	1.00693	1.15492	1.06539	1.09219	1.12091	1.12743	1.03964	1.06152	0.970205	1.11892	0.982142	1.03576	1.07883	1.00884	0.985145	1.08133	1.1366	1.04231	1.02824	1.01932	0.957145	1.05303	78.0287	14.4411	95.1943	67.2844	64.531	32.2935	221.411	39.9621	129.279	68.2066	130.158	20.7894	136.07	34.3082	56.9367	82.2803	81.8734	39.0765	102.43	38.5302	82.3733	58.6677	94.6002	22.7774	71.2305
NDUFB3	10.549	10.1042	0.934675	0.956464	0.965705	0.91288	0.92553	0.958225	0.994111	0.982565	0.99043	0.906788	1.03771	0.935804	0.920523	1.0363	1.0131	1.00887	0.906697	0.944906	0.964361	1.01463	1.0188	0.968051	82.2249	23.6226	64.371	60.319	114.075	55.6483	98.5297	69.5353	93.3288	82.1823	105.017	110.469	51.6293	67.64	70.5925	57.5229	89.6644	95.3732	58.0661	93.284	77.8751	74.4201	66.1706	56.9527	39.4582
PPP1R7	7.91577	7.38668	0.913417	0.962429	0.961173	0.88579	0.963186	0.961435	0.976608	0.980021	1.04395	0.906869	1.02006	0.958414	0.961066	1.00717	0.868639	0.998036	1.00174	0.96325	0.969125	0.991941	0.843686	0.958953	35.9028	21.6104	76.4339	95.0646	94.1093	72.7239	72.7069	79.5758	89.0527	90.6535	127.353	48.2248	61.8538	81.489	80.514	62.7731	96.6613	69.0996	64.1178	80.1404	88.1096	81.7729	74.3777	65.0642	74.1942
BAIAP2	6.63183	6.90262	0.929833	0.880568	0.854186	0.94181	1.22131	1.04946	0.996241	0.913193	1.02999	0.941937	0.821964	0.980744	1.13252	0.992141	1.063	1.01566	0.893079	1.07378	0.995903	1.05727	1.07646	0.993382	62.6091	7.57538	57.2833	109.744	92.0116	110.678	45.5572	82.7114	70.0156	61.2079	127.411	9.68277	71.5494	91.1708	63.909	49.6867	95.5312	67.7243	74.3797	66.1085	60.5653	113.3	86.9236	83.2647	33.8399
BRMS1	8.12571	8.56884	1.00317	1.10718	0.985458	1.00182	1.17745	1.14555	1.048	1.02807	0.973447	1.12676	0.962385	1.07087	1.08841	1.03277	0.973548	1.02057	1.07359	1.08022	1.07896	1.06623	1.10074	1.05453	105.96	10.082	109.238	40.695	63.6863	46.8714	117.41	51.3772	111.981	58.4115	107.072	17.1074	65.7512	36.0893	51.9763	53.6577	136.532	52.0762	111.048	43.0512	131.456	61.9725	74.1957	56.9828	91.8732
MYO1C	6.93053	6.94157	1.03513	0.956424	1.00835	1.03944	1.02508	1.05691	0.993876	1.00729	1.02042	0.983807	0.912956	1.04076	1.05499	1.00375	1.03972	0.989456	1.1044	0.998685	1.03952	0.929715	0.941986	1.0087	108.732	43.1086	94.8314	54.9694	105.63	53.1422	93.5385	50.4416	74.589	79.0844	91.307	47.3103	93.5845	45.5902	46.5126	78.7848	147.814	42.2033	116.902	49.0464	104.739	73.0804	54.136	41.5277	64.1864
UBE2C	6.26306	7.16798	1.16085	1.23188	0.928366	1.2054	1.37179	1.15242	1.11565	0.770433	1.22288	1.09341	0.979451	1.09882	1.16997	1.00563	1.1116	1.16776	1.07221	1.40057	1.03778	1.3586	1.18335	1.13518	112.221	0.619378	82.3719	19.4885	64.7271	34.0701	252.305	29.3045	103.159	28.284	132.335	1.06892	59.3365	22.6342	31.8291	41.5526	202.012	28.9227	157.224	28.8638	202.506	48.9083	144.059	16.3762	136.522
EIF4E2	8.51901	8.1641	1.02253	1.0137	1.00577	0.991363	1.09659	1.06242	1.09982	0.933105	0.928158	0.968719	1.06556	1.05613	1.02376	1.02094	1.03806	1.06845	0.938235	0.978311	0.980371	1.04978	0.727394	1.00329	72.1641	10.6509	86.7904	42.2051	89.6238	64.8001	68.8299	71.4846	108.474	72.7408	91.3181	29.9202	65.123	61.8778	68.5101	46.6165	62.4626	61.4908	92.2263	65.9308	118.522	68.8126	96.4885	70.923	58.2087
NOSIP	9.5079	9.38806	0.987396	1.00605	1.01345	0.951157	0.985481	0.986516	1.00171	0.961083	1.01857	0.967843	1.08071	0.995733	0.961358	0.986931	1.03167	1.02073	0.927265	0.936348	1.08266	1.03931	1.02888	0.998613	51.0543	18.2766	76.585	61.0623	63.3241	50.2665	86.1296	51.0757	135.488	65.3723	72.5183	61.0362	81.0983	43.4104	50.352	58.7652	76.1479	54.7401	69.8609	48.9365	45.6847	55.1432	107.189	47.3095	77.9584
RSL24D1	10.2155	10.3604	0.962926	0.972968	1.00082	1.01918	0.962566	0.996215	1.04607	1.01587	0.97476	0.972409	0.848738	0.995782	0.995089	0.996319	0.952801	1.00873	1.01435	1.02777	0.987665	0.979276	0.917991	0.983252	60.6436	24.8884	106.152	60.7952	112.782	44.5532	55.8527	49.4565	92.6908	105.844	111.1	53.0261	48.751	62.1246	36.1241	61.4172	93.995	54.6475	84.823	56.9092	52.1452	82.8878	44.8339	61.4072	117.36
LDLR	7.86464	7.82556	0.928104	1.05779	0.949458	1.12627	1.43967	1.05036	1.10844	1.04858	0.900247	1.1412	0.893302	1.1123	1.05997	0.950494	0.974867	0.959498	1.02384	1.13247	1.06274	0.664045	1.02695	1.02908	168.217	10.5181	49.446	74.0782	66.7183	37.3189	78.2153	157.299	143.773	101.806	97.1822	10.3852	38.3708	56.0223	52.5706	93.0249	58.2359	103.206	105.941	23.2501	118.838	43.2471	130.283	67.9682	37.136
ACTR1A	8.52127	8.03297	0.98086	1.00444	1.03482	0.879811	0.94392	1.13516	1.06327	1.00824	0.899208	1.06629	1.00778	1.11444	1.01065	1.00444	0.977573	1.04237	1.01423	0.940984	0.976008	0.969496	0.66903	0.987763	75.6558	11.1239	89.5083	56.8904	61.9959	62.1653	83.793	68.056	102.047	80.2736	102.912	67.1353	91.0795	62.2247	62.0432	67.9618	84.0831	69.4735	96.568	80.681	56.9801	66.7638	60.0265	58.8976	55.9006
EID1	6.43056	6.3546	1.01373	0.944039	0.996035	1.02003	0.911497	1.00259	0.979441	1.25775	0.943299	0.757616	0.850256	0.906421	0.948015	0.997762	0.857971	0.926679	0.823467	0.962837	0.985695	1.0659	0.956639	0.957508	62.1274	33.8672	147.303	75.7354	105.638	34.2458	61.2423	46.5267	77.4851	109.019	108.214	123.226	75.1124	50.178	25.8759	66.9568	36.4642	43.3952	57.2595	60.1872	47.3315	53.162	62.5227	29.8026	82.5196
ARL6IP5	10.3868	9.96538	0.992572	0.994703	1.02957	0.979314	0.878692	0.919112	0.945676	1.00574	0.862304	0.986005	0.807088	0.932204	0.98813	0.993758	0.933508	0.944896	1.04916	0.968974	0.987091	0.986135	0.887334	0.955808	56.5743	57.4556	104.405	65.3375	36.3551	45.2583	45.9492	55.5907	120.446	113.029	223.312	134.611	96.7374	44.9674	40.8049	74.6104	51.6718	59.4529	81.2459	74.2324	45.8033	64.8288	84.4806	27.6763	31.6333
BIN1	8.33609	8.00169	1.15422	0.907524	1.14994	0.802357	0.656971	0.952812	0.94047	0.990662	1.03383	0.945091	0.722828	0.860405	0.842437	1.01396	0.952571	0.989916	1.06021	0.814345	0.956066	1.00983	0.834502	0.932902	15.1151	5.07917	78.8304	12.5655	14.2699	8.53089	41.1614	56.3929	24.8308	17.6331	25.7575	379.986	35.9719	12.2361	33.4994	24.7388	46.2323	86.3392	116.617	128.462	27.7573	9.00894	151.274	31.9326	4.57376
MRPL43	6.88695	6.80834	0.993241	1.00258	1.00273	0.930454	0.954694	0.93891	0.994253	1.36806	1.10501	1.05069	0.843658	1.0325	0.988361	1.00524	0.94275	1.10927	0.956062	0.946738	0.973489	0.783054	0.823006	0.987846	70.23	29.0603	76.5453	79.7836	63.548	55.7269	90.8321	58.6489	93.6429	90.2658	88.1112	62.3198	74.3336	64.5932	54.6178	60.9894	94.1457	68.4639	89.4876	64.5171	55.5865	77.1824	53.1022	65.8433	136.862
CD55	7.1093	7.36842	0.995237	1.1202	1.03192	1.3033	1.1541	0.964002	1.03645	1.00977	1.09057	0.931052	1.42205	1.04311	0.95026	0.976237	1.05204	1.04468	0.895327	1.02218	1.03682	0.753264	0.909061	1.03532	35.8282	64.8559	59.1424	131.024	62.0063	32.8006	920.056	119.885	17.5374	86.0696	137.632	25.8062	30.9895	39.7252	30.7342	49.8889	58.6915	125.785	36.6036	18.6489	66.4929	27.2091	538.474	115.242	78.4347
SIGMAR1	7.34723	7.11588	1.00937	0.99299	0.974578	1.09749	1.09906	1.13976	0.946469	0.930161	1.15019	0.94723	0.762818	1.06701	1.10206	1.0093	0.903632	1.03587	1.17139	1.15736	1.05687	0.700505	0.911111	1.00787	71.4039	11.8886	88.2977	39.5216	67.1066	43.2667	150.727	50.1007	177.591	70.8551	74.3504	15.7099	68.3752	34.4096	23.305	28.217	173.883	40.7332	88.2677	32.6102	96.2565	84.2968	110.564	52.5638	145.014
PIGY	10.2338	9.52785	0.950801	0.987468	0.98188	1.01576	1.00633	0.901257	1.00811	1.03041	1.02163	0.89417	0.920098	0.949346	0.973285	1.01153	0.948111	0.91239	1.02959	1.13645	0.953235	1.00058	0.988529	0.981951	72.5678	32.5719	80.5076	49.9101	104.514	53.8825	81.3199	59.0357	73.4621	112.668	112.946	49.3927	54.6471	63.5948	54.8323	68.0219	59.094	62.7736	57.385	58.2924	99.5424	80.3185	69.6659	59.7838	74.7671
ZDHHC5	7.92423	7.41946	0.957803	0.976199	0.968507	1.00508	1.13039	0.984118	1.02132	1.09861	1.26341	1.03948	1.08656	1.05267	0.962924	1.03293	0.994962	0.890396	1.0082	1.03578	0.979456	0.69895	0.93785	1.00598	77.742	14.9943	111.182	63.3809	71.4899	80.5087	66.9726	76.2546	69.9666	67.338	108.9	22.1	77.9557	74.2102	65.7686	65.6114	81.8854	79.2536	111.422	52.6467	130.3	105.274	80.6099	56.7382	80.5955
MARCKSL1	7.43069	8.83023	1.18924	1.36152	1.16415	1.27193	1.36522	0.944407	1.04748	1.25049	1.04763	1.2087	1.04077	0.949178	1.24493	1.046	1.02208	1.00339	1.10271	1.22033	1.14947	1.07453	1.17513	1.13711	196.828	17.1263	166.848	118.835	62.243	14.1601	51.4051	21.3751	40.2667	142.387	175.183	32.0848	195.005	12.5405	31.9046	58.3523	56.3976	26.9613	75.063	21.2579	206.295	33.8265	75.1789	21.848	150.639
STUB1	8.62918	7.5673	0.915948	0.925135	0.982201	0.934132	0.862219	1.02513	0.94974	1.00314	1.07889	0.864034	0.789336	1.05219	0.958922	1.01297	0.903235	1.089	0.944055	0.967964	0.964479	0.789113	0.802112	0.943522	104.551	28.804	65.1063	75.5296	106.643	55.337	43.8829	62.8184	83.3029	77.6664	74.4734	64.4053	61.463	48.4198	55.4647	54.0502	103.549	53.7871	78.1584	59.2382	94.2009	74.5795	75.2473	68.6434	54.3923
CD14	8.321	10.5219	1.15821	1.15638	1.2078	1.26889	1.27735	1.02055	1.13251	1.04732	0.973382	1.03314	0.947284	0.919671	1.04387	0.991076	0.948815	0.962939	1.06906	1.06015	1.0235	1.007	0.955132	1.05734	267.82	34.1723	206.573	32.5695	36.772	52.3467	96.035	120.995	272.145	144.63	103.636	86.3586	159.124	17.1012	46.333	53.0427	5.56004	43.7627	100.001	22.5225	26.1477	46.2033	55.4481	16.2344	25.1839
ZMAT2	8.6093	8.33453	0.961577	0.969217	0.946566	0.96205	1.02998	1.08183	1.01984	1.02629	0.918414	0.986863	0.958752	1.037	0.998811	1.01064	0.929619	0.960398	0.954334	0.986397	0.918919	0.970774	0.824983	0.973964	128.031	19.3799	82.64	75.4641	87.6407	68.455	88.3016	76.3704	81.6378	95.5504	106.733	55.7358	91.1582	70.6154	65.9005	70.5663	82.8082	70.191	67.9335	69.391	50.1587	79.9547	100.76	55.3336	63.8696
BOLA2	7.93269	8.34579	1.01001	1.09621	0.96989	1.05792	1.17088	1.11867	1.08308	1.02125	1.08774	1.07828	0.934161	1.18986	1.20383	1.05078	0.996517	1.0785	1.02731	1.0971	1.14953	1.03369	1.14898	1.07639	100.44	8.82803	67.0337	39.6655	116.484	41.3986	155.889	60.7945	95.7745	48.9607	116.732	19.5092	60.987	35.6348	63.546	54.0097	128.955	54.3672	53.0351	36.0013	158.876	63.5352	54.0637	42.4064	211.11
SLC7A8	6.45373	6.53292	1.25388	1.06442	0.969647	1.03539	1.02479	1.13196	0.951455	0.957657	1.1168	1.11731	0.800472	1.19285	1.1289	1.0211	1.04002	1.28529	0.992932	1.15259	1.10814	1.03132	1.09302	1.07	158.177	9.00643	204.698	22.6142	56.0359	29.5354	29.0326	27.5941	48.0403	49.4452	26.154	11.5541	68.1467	24.858	39.3286	43.1569	243.33	28.1576	72.4919	39.2483	218.661	31.6226	95.8271	16.1839	63.3116
VKORC1	8.6965	9.03316	1.02656	0.996639	1.09319	1.14267	0.933024	1.07649	1.0646	0.997117	0.965702	1.01031	0.983647	1.05732	1.12219	0.962216	0.942117	0.998126	1.00394	1.06458	1.10888	0.997777	1.02457	1.02722	113.635	47.3395	137.527	55.5857	98.8215	31.3933	86.5111	48.6493	58.5366	120.725	81.3354	53.7746	113.497	31.1614	27.5011	59.1505	82.603	33.7754	100.408	33.0169	116.787	42.9939	152.099	36.6055	87.5504
HEXB	9.80507	10.3357	1.01614	1.0777	1.08109	1.11364	0.990062	1.06267	1.05627	1.01329	1.09304	0.953194	0.921184	0.975228	1.05914	1.02187	0.970618	0.992014	1.11475	1.07277	1.05205	1.02775	0.884405	1.02614	103.516	31.7237	121.97	45.1112	83.2463	52.0245	89.2583	40.6587	104.618	98.1156	122.912	59.2822	79.8176	21.6173	24.8878	133.499	57.1624	21.5248	58.8979	34.0692	59.2532	39.2794	130.268	27.7003	56.2704
PDAP1	6.03553	5.96371	1.03979	1.02875	0.99341	1.08365	0.991799	1.05748	1.07789	1.05326	0.970393	1.05858	1.00909	1.03047	1.02558	1.01685	0.908147	1.09655	0.913269	1.00416	1.03	1.01377	0.939143	1.01629	191.819	13.7127	85.3198	52.8042	69.9896	52.8024	135.194	60.768	75.6195	71.7118	93.0398	46.0958	56.2855	50.2302	46.7045	54.2479	119.778	57.4418	92.9103	64.6904	314.716	64.6814	82.6581	48.5276	136.001
TRAPPC5	8.66489	8.43506	0.969457	0.982171	0.985734	0.998133	0.926978	0.984402	1.03647	1.03776	1.1532	0.915842	1.02398	1.06349	1.00623	1.04468	1.00567	1.0768	0.959702	0.939389	1.02708	1.08485	0.831261	1.00254	70.8808	25.0137	78.8722	74.0975	110.929	63.4565	86.4506	84.5763	79.7134	93.9558	53.9088	43.6008	82.6143	54.7169	62.759	51.4132	55.7563	61.7949	65.6504	57.9858	135.398	63.0637	54.9733	69.4218	93.3503
HNRNPR	9.0541	8.7214	0.952366	1.06015	1.01609	1.04789	1.07487	0.891824	1.01124	1.01169	1.09947	0.96326	0.895554	1.04633	1.02072	1.01351	0.956055	1.00577	1.02552	1.12715	1.02193	1.02628	1.02084	1.01374	76.9565	14.6008	114.011	58.1056	56.1558	45.7898	105.763	62.3922	85.4758	100.282	184.75	35.7289	73.2834	61.1357	44.5754	61.3917	123.531	49.9332	108.112	50.2271	97.389	93.9903	114.19	40.3605	84.4754
MUCL1	6.02932	5.76944	1.29243	1.05162	0.936573	1.40941	1.70462	1.02799	0.897738	1.84618	1.72299	1.12349	1.90938	1.10509	1.05757	1.23576	0.934379	1.32461	0.858698	1.16294	1.25924	0.800284	1.57196	1.24919	39.8668	353.92	26.5285	14.5663	171.622	0.457415	13.0516	1.56836	102.706	696.426	0.921577	0.122831	14.0919	0.407719	12.0504	9.53451	10.5075	0.614078	14.8767	1.65372	1.44538	0.229349	1.51195	0.154107	18.8052
SNRPA	7.64331	7.59208	0.956454	1.0394	0.951889	1.02826	0.951752	1.06303	0.967573	0.955907	1.0303	0.926799	0.969233	1.00474	1.00651	0.993957	1.04727	1.04546	1.00424	0.96496	1.0323	1.07737	0.991211	1.00041	94.0924	12.8693	71.4602	73.3881	79.1756	60.4015	115.337	66.3704	103.313	72.8048	110.616	26.6726	57.4632	45.1536	47.0331	53.6262	90.4531	73.0912	83.2369	46.5792	100.298	74.3662	94.2177	42.6054	113.507
MCM7	7.71165	7.77977	0.978293	1.09699	0.952974	1.1003	1.08555	0.957965	1.02154	0.943428	1.06088	1.00442	1.07361	1.06159	1.07448	0.978542	1.03177	1.0302	0.956966	0.999867	1.08189	1.10252	1.04091	1.03022	271.641	4.34017	61.764	29.5062	67.0266	29.3306	212.042	37.9953	58.7943	48.0695	178.687	14.6473	45.9845	37.7885	31.3688	37.8694	87.4555	32.5512	103.717	37.3691	310.815	40.5612	183.893	24.6498	143.81
ISCU	8.90615	8.36317	1.04475	0.962575	0.998154	0.891667	0.850436	0.876238	0.96418	0.98612	0.994653	0.90279	0.964925	0.905924	0.907175	0.969535	0.97882	0.962223	0.921465	0.905799	0.986678	1.02548	0.886111	0.946938	69.4574	42.6691	102.885	77.8756	44.9712	41.6471	69.8061	57.1533	81.2911	105.666	132.126	136.953	76.284	38.4863	31.5431	59.4574	66.5408	63.7918	82.946	67.4372	82.5848	45.6354	61.1899	37.3098	100.083
MYADM	8.59276	8.53435	1.11887	0.97914	1.14037	1.22177	0.98442	1.11056	0.993202	0.999602	0.9109	0.956574	0.980638	1.03481	1.02342	0.895633	0.889564	0.920253	1.0292	1.05836	1.02485	0.954413	1.02835	1.01214	61.2785	16.2775	189.582	57.314	44.879	16.6424	15.4285	145.852	40.8854	65.6302	118.48	59.3241	57.4138	36.6023	3.5436	33.2553	98.3582	24.1577	161.415	17.4243	83.3615	9.22235	124.727	40.248	24.2379
GLRX3	8.3318	8.42481	0.990987	1.04997	0.943843	1.08493	1.16979	0.912339	1.06881	1.03288	1.13265	0.960259	0.908528	1.04501	1.08303	1.09736	1.01229	1.06589	1.03091	1.01335	1.0749	1.00049	1.00185	1.03238	83.395	9.22855	67.2772	42.2337	102.655	59.0611	89.377	50.0791	106.267	64.5421	121.005	25.8154	53.3441	62.5393	57.7806	68.5557	93.0821	61.4637	88.2596	58.2349	73.4471	90.2926	62.9647	75.111	105.84
NENF	9.42451	9.28152	0.972614	0.950314	1.04793	1.0089	0.882439	1.03196	0.989422	1.02308	0.90313	0.980472	0.896687	0.979262	0.961339	0.931014	0.959616	0.903395	0.958366	0.940688	0.984941	0.952904	0.81359	0.955812	79.2965	20.8595	69.189	53.6125	215.404	39.3669	212.383	42.8507	85.3278	83.9082	62.7996	70.8233	46.8229	31.5516	50.0365	44.7643	83.2484	39.7454	41.1385	41.3755	103.821	43.4449	79.6913	32.1006	99.8264
HNRNPUL2	8.66073	8.55448	0.990742	1.02934	1.00784	0.974191	0.993261	1.07675	0.98457	0.998764	0.959731	1.02671	0.963384	1.03405	0.984595	0.980969	0.975114	0.9439	0.935144	0.994794	0.999685	1.00034	0.793953	0.98323	92.9006	20.6888	95.9468	64.1308	73.327	66.0443	79.5374	71.0615	61.1936	98.293	84.9424	35.9372	92.7252	57.9856	61.066	72.4584	157.848	59.4444	132.347	64.6763	89.5685	88.4572	101.865	33.0996	87.0556
CTSK	9.21796	9.76642	1.07056	1.14281	1.11848	1.2335	0.951672	1.10814	1.04982	1.02913	0.879447	0.905799	0.8503	0.973256	1.04524	1.03009	0.863929	0.923449	1.10884	1.10859	0.995625	1.06887	0.994526	1.02153	429.909	2.65058	387.217	5.50887	87.9168	12.053	44.7294	82.1062	38.6935	798.636	123.27	51.6994	347.239	6.74848	4.45389	30.1235	26.0756	5.21747	49.8817	13.8933	19.1911	19.6611	58.4535	15.662	8.55302
AGTRAP	5.70116	6.10442	1.10949	1.16057	1.01393	1.11319	1.13372	1.24569	1.10546	1.53897	1.28095	1.16256	1.5509	1.13243	1.24719	0.983767	0.85234	1.0595	1.14805	1.13364	1.11441	1.13823	0.946842	1.15104	75.273	11.088	96.4096	65.0139	58.631	52.3502	184.216	48.7999	127.342	86.9503	77.1071	18.963	171.722	26.039	78.1437	51.6885	110.479	77.3135	81.7802	24.7501	233.532	65.3613	197.08	35.6184	26.4866
PAM	10.5488	9.3294	1.0124	0.944893	1.02332	1.00648	0.753041	1.08882	1.00804	0.994154	0.928314	0.960193	0.881459	1.02884	1.00554	1.00905	0.863684	0.970451	1.103	1.00105	0.921646	0.961228	0.773523	0.963768	60.6311	172.707	167.165	81.5367	62.2662	20.2487	46.1513	43.5436	63.6369	82.3802	86.48	110.666	117.552	15.0161	21.495	66.1107	52.3154	21.6023	46.0767	49.3106	84.6372	22.3301	174.7	35.7748	56.3442
EFNB1	6.77066	6.0566	1.11848	1.11443	0.969518	1.19748	1.27926	1.4672	1.055	1.4025	1.05124	1.38777	0.91206	1.27655	1.174	1.0401	1.26891	1.13965	1.30052	1.198	1.25764	0.59486	0.829136	1.14449	129.19	2.43276	83.6332	38.6745	68.2076	20.7574	106.322	27.3291	79.2065	71.0184	94.5553	5.98839	92.5911	31.9406	23.4445	31.4184	158.362	61.163	275.072	24.5905	109.152	41.2957	145.357	27.7148	35.966
FAM32A	8.64096	7.87286	0.96732	0.991486	0.972208	0.975146	1.02425	1.03748	1.03656	1.04085	1.07315	1.01141	1.20801	1.01208	0.989836	1.01641	1.03159	0.939473	0.948236	1.02964	1.02592	1.01144	0.8553	1.00942	156.821	18.636	95.202	72.163	77.9865	55.7288	81.571	59.2422	102.096	91.0912	111.366	34.424	79.8495	64.6488	52.6484	62.9967	100.288	63.7586	83.8513	64.4833	98.1565	68.0254	77.1788	52.9896	86.6538
SCAND1	7.5719	7.68645	1.05702	0.993822	0.995297	1.02201	0.994563	1.01961	1.00304	1.03141	1.01803	0.990464	0.928499	1.05801	1.04923	1.00635	1.00636	1.05818	1.04392	1.03561	1.0624	1.04947	1.04865	1.02247	98.8599	29.7195	77.4855	124.369	89.7019	52.836	92.5175	79.1668	66.7622	85.9083	133.352	32.3943	90.0138	41.5505	67.626	39.6221	64.3211	44.0756	56.9918	36.7621	175.514	48.6647	65.9368	56.8997	179.645
BZW2	9.02843	8.65569	0.916832	0.947139	0.998092	0.933553	0.961727	1.02223	1.01555	1.05526	1.09494	0.954756	0.783101	0.979763	0.955285	1.12755	0.918528	0.910645	1.08031	1.01962	0.994627	0.949876	0.875502	0.975947	91.3153	5.83902	55.6492	56.4108	113.56	49.0247	62.3993	47.1156	68.4302	84.8039	83.5682	94.7012	34.021	46.4513	31.3476	38.5429	99.0824	58.312	69.9788	68.506	99.1433	76.1752	115.726	47.9607	106.676
HMGN3	6.06936	6.17289	1.00519	1.0019	0.985217	0.990718	1.00042	0.984438	0.997849	0.955179	0.94936	0.997025	0.722473	1.02109	0.967976	1.03281	0.995421	1.03936	0.843238	1.0352	0.94803	1.03548	0.97046	0.975183	107.506	24.6882	46.1591	112.833	96.8105	36.0656	62.4205	72.0132	64.5265	88.4941	405.7	44.8319	43.8339	66.3607	68.1869	73.7802	22.9274	66.3539	41.5543	75.8174	126.504	55.8365	91.2802	47.8114	77.7431
CTBP1	7.73	7.63911	1.06201	1.0231	1.01645	0.988242	0.964467	0.981542	1.0125	0.942203	1.02433	0.957782	0.962505	0.991234	0.979857	0.993457	0.999774	1.01897	0.959175	0.9681	1.02837	1.01258	0.936637	0.991585	72.7537	22.2635	89.665	79.0433	55.6701	51.2113	59.5558	63.7654	88.2757	84.2764	95.664	59.4412	90.2705	46.0274	45.1359	57.4106	109.719	73.3956	105.244	60.3199	128.313	76.5737	68.2581	42.8367	73.1398
WBSCR22	8.19615	7.94408	0.951883	0.973477	0.99688	1.00079	0.897257	1.02948	0.96336	0.993313	1.04463	1.09723	0.962436	0.992979	0.95695	0.969596	0.939727	0.876591	1.07092	0.947488	0.991092	1.04877	0.933075	0.982758	94.044	19.8302	52.5974	97.4158	76.3367	40.5485	159.929	48.0114	56.0701	72.0497	101.053	58.2926	43.4298	45.6121	41.7837	59.6228	51.4169	53.6023	61.3478	53.7893	105.877	60.5068	122.824	47.8239	179.858
SF3B1	7.9678	7.54021	1.07639	1.08307	1.01083	1.04361	1.01803	0.870373	1.00139	0.909428	0.953192	0.926781	1.01392	0.958108	0.984457	0.969179	1.00278	1.0376	0.937661	0.965076	1.02103	1.03179	0.899547	0.986392	99.5746	18.1961	96.3371	68.8978	81.0081	52.6986	89.2469	62.4546	66.6942	96.392	171.634	44.1916	66.5382	63.7584	45.1641	72.1178	90.9452	46.5534	103.671	49.7569	81.7084	83.7325	96.802	29.9746	63.2659
CTSL1	7.55184	9.51152	1.26775	1.14531	1.20844	1.31189	1.05142	1.07636	1.28451	1.42883	1.12512	0.988855	1.1498	1.0965	1.00448	0.975726	0.992387	1.00252	1.20492	1.08161	1.18784	1.12594	1.12448	1.13499	104.947	41.5806	148.45	36.2635	61.1242	26.6714	164.087	51.4592	195.909	160.559	91.7122	47.8904	125.647	7.24179	26.3147	61.3774	13.6131	19.9124	158.434	13.1919	63.0475	63.9835	231.216	18.1304	69.2312
KLF10	6.26718	6.24853	0.994507	1.08488	1.05391	1.04793	1.04668	0.973097	1.15977	0.947043	1.0245	0.984989	1.06631	1.06616	1.01736	0.977009	1.00745	1.00096	0.945775	0.977726	1.07707	0.995682	0.923658	1.01774	40.3116	10.9916	78.27	60.5749	49.2856	55.134	68.3608	78.7458	53.7785	136.917	77.7813	54.2249	88.2422	82.3107	33.482	54.4728	45.8653	107.328	81.2682	29.0824	99.4492	67.5638	122.575	53.5459	11.4277
RAB2A	7.73647	7.95926	1.03539	1.00053	0.990351	1.02065	1.1976	1.04711	1.1026	1.08419	1.05097	1.04729	1.20473	1.06229	1.10425	1.03256	1.0108	1.13317	1.08134	1.08275	1.04039	0.974502	0.894598	1.05705	52.8462	22.9875	109.117	52.5425	90.8797	80.9083	71.4372	68.8214	61.5499	75.6797	69.0657	44.046	91.1302	80.2178	83.2325	75.1781	56.8077	55.0533	93.101	51.9421	87.5707	91.4328	88.5482	45.1128	78.151
CORO1C	7.78435	8.16374	0.991419	1.01531	1.05976	1.18939	1.07034	1.14728	1.04874	1.02497	1.03102	0.958129	1.092	1.1057	1.0427	1.03733	0.985119	0.957248	0.99684	1.09895	1.00258	0.974751	0.892842	1.0344	141.408	9.21765	111.861	39.0893	77.7768	33.4541	76.9931	47.5016	76.5211	59.4876	74.7447	19.7721	71.2846	63.2173	35.2845	45.7139	96.9245	39.0674	204.747	39.2489	222.77	51.5775	98.1235	48.0811	176.375
IDH3B	8.8741	8.396	0.956277	0.963724	0.983807	0.881117	0.898347	0.990831	0.964593	1.06183	1.08597	1.01287	1.06029	0.960849	0.879155	1.01538	1.00653	0.982508	1.00385	0.81593	1.00471	1.04155	0.847738	0.972279	71.8681	19.2673	76.3375	57.4045	90.507	68.185	140.368	61.3974	66.4773	88.4868	111.719	107.457	56.62	53.7618	34.325	52.2	98.8	63.0697	99.0098	62.8753	54.5955	69.0266	90.7894	47.2003	172.213
NDUFS4	7.61358	7.11127	0.923613	0.932198	0.991739	0.891782	0.886112	0.985447	1.01576	1.24246	1.15308	0.912296	0.89197	0.962738	0.875748	1.00853	1.01429	0.995614	0.954175	0.970708	0.960263	0.67701	0.859224	0.95737	65.3457	20.9252	80.6539	50.3212	93.2497	55.4124	74.7082	59.2573	98.7665	103.247	85.1975	122.242	53.381	68.0327	34.2897	50.8564	50.4355	62.0087	60.3878	78.9714	52.0199	71.4263	71.5192	54.3622	78.5894
PVRL4	5.37178	6.45264	0.835298	0.922989	0.847238	1.03869	1.22646	1.07355	0.9822	0.933785	0.954932	1.14191	1.03543	1.16529	1.15404	0.993357	1.10158	0.996133	0.970369	1.19203	0.963391	1.45605	1.29742	1.06106	86.6053	6.74797	50.1978	80.5934	115.594	94.2738	256.966	89.404	37.153	62.2606	64.7909	4.73188	66.5743	114.719	82.8992	64.982	66.0039	94.1962	36.3831	73.0502	51.57	121.793	137.421	68.2723	93.4728
HSPH1	9.32108	9.4065	0.990629	1.08274	1.02777	1.09723	1.14692	0.957168	1.25323	1.02495	1.1254	1.04104	0.912404	1.08376	1.07713	1.04552	0.957266	1.00159	1.16668	1.22367	1.09462	0.988939	0.952475	1.05958	73.0915	2.67146	57.2166	102.262	152.844	38.1774	61.0449	36.5268	140.902	48.9838	78.1175	21.0871	78.6797	46.4485	39.9455	104.24	145.99	90.3124	159.473	47.0537	81.9208	102.672	102.097	40.4542	107.445
VPS25	7.33937	7.34682	0.992147	0.996694	0.95348	0.983122	1.10633	1.01372	1.02558	1.07168	1.05469	1.15166	0.773349	1.11076	1.11586	1.04542	0.950934	1.06022	0.999387	1.09696	1.00363	0.871212	0.843871	1.01051	101.112	17.4159	88.7259	79.1621	77.8821	71.5646	85.8554	82.7923	78.2903	83.6458	96.4088	24.4813	76.857	69.1544	59.732	62.0232	104.176	56.7435	83.6462	61.5836	109.411	90.4191	101.688	65.0603	128.319
TMEM205	8.59235	8.37184	0.991754	0.963366	1.04386	1.03186	0.933885	1.06441	0.97239	0.956735	0.877793	1.03898	0.890859	0.947297	0.968028	0.935455	1.02085	1.00881	1.058	0.923521	0.982091	1.00231	0.772057	0.970681	130.472	36.4873	96.2143	119.766	81.983	47.8242	130.22	63.5154	49.4821	78.42	121.507	78.6045	59.6868	47.6432	36.2127	61.2377	76.9466	62.3147	39.033	61.1384	138.369	56.2166	85.9351	36.5189	73.1491
HMGCS1	8.2937	8.16362	0.931466	0.976796	0.907967	1.0195	1.12392	0.959408	0.954927	1.08312	0.970618	1.14532	0.985925	1.01295	1.02767	0.981	1.02416	0.921297	0.942185	1.07168	0.897624	0.986706	0.720286	0.983073	138.304	7.54916	37.9975	25.764	50.2722	57.1258	61.5539	133.795	93.0568	215.807	60.0355	10.4979	25.1507	116.072	85.9462	176.59	90.451	51.0583	168.809	49.4576	53.3216	80.8822	179.84	42.3159	43.6853
IARS2	9.62226	8.9788	0.953514	0.966224	0.989879	0.973498	0.982824	0.929922	0.97695	1.02515	1.11512	1.00809	0.864262	0.974722	0.946404	1.019	1.03853	0.96588	1.03267	1.03762	1.01557	1.00472	0.896381	0.986521	89.3937	21.4113	59.6033	60.4274	121.118	55.8703	237.888	61.0229	86.3447	77.3533	89.9498	50.6248	46.0023	58.7125	47.8555	63.7464	129.237	48.0807	66.7893	56.692	97.6649	72.9684	76.2857	40.9164	130.57
TAF10	8.86135	8.86506	1.03071	1.01644	0.992922	0.971637	1.04543	0.947766	1.03132	1.03508	0.950271	0.983358	1.0281	1.02286	1.02236	0.978395	1.00911	0.971148	1.01007	0.988706	0.984215	0.997401	0.931359	0.997555	67.0696	24.6021	103.556	80.617	97.203	62.3116	79.7737	65.117	120.718	86.8777	82.8344	36.4797	77.2654	48.6486	60.8765	56.7641	88.7184	60.9043	111.945	51.6644	104.137	84.2658	91.6051	55.134	75.229
POLR2J	5.71062	6.26904	0.965206	1.03672	0.974528	1.01576	0.991597	1.03523	1.0304	1.36592	0.908485	1.00965	1.55883	1.04667	1.00581	0.994263	1.14336	1.02852	1.32265	1.04512	1.05357	0.959189	1.2519	1.08302	219.721	22.9793	82.3562	63.1467	86.7541	48.0136	150.241	59.342	54.8897	68.9066	95.9338	64.9756	51.7936	45.8356	46.7418	49.0558	90.8322	63.2988	68.0676	53.7123	297.393	53.4283	51.6698	51.4322	141.76
SELM	7.54957	7.29099	1.15742	1.05209	1.11152	1.12177	0.82691	0.966316	1.00406	1.02675	0.943154	1.02615	0.871096	0.962523	1.01322	0.916393	0.936781	0.995432	1.00896	1.08133	1.05482	1.01355	0.709383	0.990458	64.1668	67.9737	192.499	55.331	84.3134	24.2097	98.3283	48.1133	34.2901	117.948	58.9089	82.9067	164.04	8.72752	3.74942	60.8506	34.2348	14.676	26.396	10.9661	317.612	17.4783	115.209	18.3412	45.76
PRSS23	6.49652	6.24081	1.04609	1.05227	1.18706	1.14887	0.925147	1.20108	1.04417	1.52863	0.72855	1.1113	0.746511	1.19415	1.12524	1.09881	0.95434	1.27172	1.13858	1.16126	1.13687	0.973603	0.727759	1.07152	62.0769	14.9702	278.216	124.818	76.6138	16.1064	21.6399	21.5328	50.395	111.08	131.244	31.222	95.8998	7.91953	12.6543	127.118	78.4006	10.5434	238.316	16.2268	111.529	26.4635	83.6682	25.7247	74.9876
JAG1	8.30783	8.65831	0.965127	1.0046	0.983693	1.02707	1.10515	1.17436	1.05137	1.20779	0.940065	1.13465	0.991365	1.03684	1.12866	1.03303	1.08237	1.12537	0.944387	0.964324	1.03356	0.940851	0.938736	1.03873	100.118	0.948908	145.207	19.3255	143.553	44.2686	93.209	35.043	140.844	68.6084	158.599	11.598	112.214	36.0447	33.4965	38.7944	71.0125	38.8947	197.626	41.1738	344.002	99.6483	78.438	35.1636	171.093
CALU	7.84017	8.63495	1.26355	1.09717	1.14626	1.25562	1.0909	1.07595	1.14534	1.18373	1.00611	1.02366	1.00817	1.03426	1.04516	1.00579	0.981644	0.99064	1.13852	1.15401	1.1224	0.942513	0.984007	1.08073	81.3465	18.4008	248.08	27.38	127.193	21.3934	55.7891	38.3557	61.0327	74.6399	141.916	36.9955	116.536	27.0843	20.0303	46.365	91.2314	22.3137	115.987	23.5659	131.958	34.9539	108.72	22.0304	114.761
RHBDD2	8.42877	8.11581	1.05322	1.01951	0.989066	1.0337	1.06509	1.08245	1.01012	1.00896	0.990078	1.07886	1.10355	0.980463	1.09349	0.982656	1.02408	0.988114	1.10458	1.0761	1.01372	1.03504	0.799566	1.02535	186.515	22.9177	111.531	137.171	205.289	50.9602	108.255	49.0938	76.7016	62.3578	95.823	32.2371	61.7202	33.8603	48.7282	62.5652	27.1832	35.2798	44.9016	34.5064	192.393	46.4104	64.517	29.9934	206.408
LSP1	6.51865	6.43239	1.06137	0.991539	1.04388	1.04793	0.973189	0.931816	0.963843	0.86878	0.998745	0.882875	1.27178	0.966924	0.933297	1.00079	1.0301	0.997675	0.860037	0.896971	0.98417	1.04667	0.838056	0.980497	127.149	11.3801	100.559	237.792	25.8693	31.6792	26.5953	90.7018	76.3298	60.1771	60.4613	44.1374	239.176	43.4133	42.9228	64.4077	16.6716	19.0959	54.1717	86.0806	13.3409	26.6178	34.1289	54.6552	14.7159
PGRMC1	9.46513	9.5138	0.955691	1.01306	1.0003	1.06683	1.0668	1.00154	1.02313	1.02118	1.00397	0.964047	0.877616	0.993808	1.02962	1.04236	0.961895	0.930677	1.06113	1.09469	1.01412	0.95557	0.908663	0.999366	150.592	23.814	94.8903	59.81	125.378	40.5569	110.636	46.0128	60.32	186.74	105.547	31.07	67.5144	42.8457	56.496	63.4168	91.5746	39.0326	86.1527	35.3324	86.6869	61.6863	75.0211	30.9207	113.833
TRIP10	7.26056	6.0989	1.03424	0.863448	0.946256	0.922854	0.835892	0.905338	0.946414	0.558726	1.08987	0.921407	1.16002	0.999109	0.789988	1.02799	1.00886	0.971355	0.911794	0.749861	0.999869	0.822815	0.821249	0.918445	36.6076	7.05398	57.6698	95.1775	41.0201	185.732	47.292	98.579	31.4207	39.825	85.4686	59.8343	46.7721	114.914	62.6942	53.1256	68.0619	84.4992	81.2406	52.1412	74.7611	120.221	64.0382	46.8698	42.0464
PIM1	6.95543	8.58072	1.03025	0.872624	0.86198	0.852742	1.24577	0.968121	0.966052	1.03064	0.939924	1.03719	0.905878	1.13035	0.994252	0.992036	0.933718	0.882326	1.05445	1.0264	0.931297	0.953091	1.12527	0.987351	108.061	1.91199	93.6745	41.1824	112.79	195.367	19.2586	169.455	22.9183	79.7426	49.5469	10.4134	68.7391	135.86	122.902	54.0116	54.2735	79.3875	98.2315	83.0007	21.5867	95.1525	70.4076	80.7672	36.0869
POLE4	9.40428	9.64872	1.00662	1.03979	1.06857	1.01162	0.971973	1.03908	1.09819	1.10672	1.05202	0.941799	0.999392	1.06528	1.02644	1.03238	0.959633	0.916824	1.00913	1.00147	0.996673	0.989369	0.931159	1.01258	93.6458	14.4708	72.453	36.0049	53.6273	43.8186	84.0274	59.0288	80.7468	81.327	68.2866	47.8459	59.9516	36.5863	38.1607	53.2317	82.358	56.4247	100.078	41.0955	109.373	38.3152	139.404	50.43	89.1002
MRPL3	8.74904	9.08291	1.00623	1.02498	0.999425	1.00534	1.06088	0.967126	1.03093	1.05655	1.12338	1.11857	0.979957	0.987712	1.02342	1.03371	0.977951	0.974059	1.10251	1.06223	1.02532	0.996288	0.942522	1.02377	83.429	20.3684	84.3597	45.7644	142.764	48.3753	112.331	48.7714	81.9716	70.4173	121.881	38.6064	53.778	55.8568	37.1739	52.1088	98.9021	51.5461	104.882	48.7001	118.603	90.0664	131.178	61.1519	147.569
SRXN1	7.39557	7.37847	1.02157	1.02267	0.908029	1.0751	1.11576	1.07953	1.05547	1.32618	1.1274	1.03627	1.15037	1.05704	0.945636	1.10668	0.921724	0.881441	0.992158	1.08362	1.01236	0.690958	1.19709	1.03843	220.342	7.33874	50.464	52.877	260.926	41.0961	114.378	56.3458	50.1373	30.4644	30.7827	14.2084	29.2067	52.5355	195.795	27.4516	66.0381	19.8869	55.4107	30.4668	154.434	61.6985	82.1056	59.6696	397.717
CDV3	8.19837	8.22436	1.00551	1.03404	1.10001	0.99295	0.949225	0.936898	1.03691	1.02494	0.96496	1.0108	0.90826	0.991865	0.967801	0.999203	0.948017	1.01366	1.08277	1.0247	1.0171	1.00487	0.973408	0.999423	73.7164	8.05076	83.8746	48.5967	88.0911	42.7476	112.41	77.3685	84.4657	87.0674	151.804	48.635	67.5015	56.7251	46.2787	62.3931	82.6292	55.5159	125.561	54.9078	88.7086	74.1106	124.076	52.8748	141.43
RAB6A	7.33779	7.55488	0.993284	0.928416	1.00993	0.885653	0.960535	1.04301	0.990014	1.01336	1.0604	0.939659	0.831893	1.01927	1.02483	1.03961	0.92305	0.96458	1.1362	1.11137	0.998672	0.970114	1.02514	0.993762	102.916	12.6929	84.5193	51.8911	52.4287	68.138	246.295	60.0724	62.383	79.6767	76.8357	36.6838	58.6257	84.3137	62.9177	68.2325	97.1937	62.6726	92.7132	69.5073	155.328	97.8079	70.5651	58.346	115.428
SERPINB6	8.59512	8.84146	1.04827	0.895255	0.978456	0.892864	0.984357	0.986937	0.995541	1.0115	0.866326	1.0034	0.91132	0.920015	0.95529	0.968397	1.03971	0.90662	1.0124	0.96671	0.908549	0.947073	0.80756	0.952692	78.2447	22.1385	54.0696	92.321	80.0573	98.1072	40.8966	83.8059	82.3614	61.1172	126.276	85.8572	53.113	107.742	67.051	64.842	55.2898	52.323	57.5292	76.439	25.7605	102.318	130.768	88.2732	49.3024
GORASP2	8.38585	8.58429	1.03525	1.00091	0.98552	1.00899	1.06938	0.979215	1.03812	1.06068	1.0497	1.04751	0.775328	1.00197	1.0526	1.02264	0.952286	0.993517	1.05783	1.0786	1.0128	0.993086	0.934664	1.00717	100.582	26.2566	92.5601	69.6125	143.72	65.7007	71.9525	57.8824	62.6551	74.5179	104.877	34.5686	67.0453	68.2988	53.7497	73.5192	83.9204	55.9893	73.7514	52.3799	154.395	82.5851	83.1822	56.0311	102.055
CLTC	6.3414	6.84995	1.09184	1.03957	1.06558	1.0927	1.10373	1.01634	1.0479	0.996173	1.10558	0.978915	1.04925	1.13493	1.18595	1.08409	0.975499	1.2116	1.07877	1.26569	1.07054	0.965172	0.901818	1.0696	85.9741	17.0472	99.3558	74.6187	113.426	67.2611	79.7084	58.7586	78.7058	80.7697	122.745	32.3508	93.9811	67.3929	71.3157	95.5563	84.2844	46.8145	100.123	51.4304	109.186	93.4989	105.929	43.4595	111.553
MAPK13	6.96435	7.67415	0.951589	0.892472	0.798478	0.888407	1.26581	0.883216	1.08211	1.00763	1.05731	1.09304	1.07202	1.1302	1.02759	1.05779	0.998337	0.935451	0.959419	1.2109	0.9292	0.94007	1.03556	1.01031	107.343	24.1476	36.6997	49.7664	65.0097	117.751	117.201	97.0813	55.5816	98.6667	74.1129	12.9693	53.4994	99.4714	134.931	115.88	136.298	83.8776	56.8257	89.9265	46.9874	125.977	44.437	82.0066	95.2746
LASP1	9.94249	10.4556	1.00265	1.05003	1.05691	1.08596	1.13542	1.04102	1.10456	1.02802	0.946334	0.984542	0.979594	0.992689	1.00286	0.976115	0.995022	0.979035	0.97162	1.02913	1.00577	1.0289	1.02162	1.0199	118.067	11.6006	101.272	102.517	113.776	51.7719	69.7195	42.5738	130.368	69.7094	123.5	32.0373	122.395	35.2188	36.8156	66.5832	137.377	37.8765	170.661	36.5404	92.3809	57.8023	106.89	20.4663	95.0865
PQBP1	7.02307	6.85006	0.983581	1.01045	0.982139	1.00149	0.959529	0.943429	1.00544	0.849664	0.969132	0.864519	0.931173	0.967884	0.978398	1.00684	0.987029	1.00393	0.781098	0.923375	1.04646	1.00867	0.894636	0.957089	102.324	22.6347	89.0829	86.7919	101.933	62.1513	93.753	58.4581	66.6407	94.0189	91.7529	50.328	53.1393	60.0109	49.2455	56.372	94.5693	76.0629	54.6439	66.45	115.726	70.4591	103.366	62.6014	160.237
EBNA1BP2	8.93643	7.43645	0.960269	1.07069	0.958384	1.0444	1.16288	1.10953	1.06311	0.933752	1.02393	0.97653	0.711485	1.1025	1.13933	1.06735	1.05144	1.10603	1.02407	1.02378	1.06703	1.0544	0.893255	1.02591	97.7766	12.1137	55.3741	63.1381	47.0684	51.976	122.032	53.4575	121.506	74.9091	100.348	18.4255	59.1419	53.5184	47.5529	55.4502	142.917	48.4402	117.28	48.7705	146.747	78.3675	85.6116	73.6982	69.0427
RARG	5.77636	5.6911	0.964391	0.994337	0.998397	1.01398	0.984458	0.969993	0.989254	0.767297	1.14262	0.966908	0.856888	1.11401	1.07712	1.0379	1.28688	1.20163	0.7582	0.932697	0.972136	1.49729	0.85811	1.01831	73.9307	3.31948	55.1171	60.1748	82.8429	132.974	84.698	138.706	52.2881	86.8676	108.096	11.6229	93.3053	94.7272	88.1355	74.6811	112.581	86.5347	87.3075	113.019	23.1715	198.314	126.043	71.0984	55.7625
PPP2CB	8.436	7.97657	0.966592	0.926193	0.970814	0.93633	0.945663	0.929806	0.94554	0.985913	0.960409	0.962337	0.881665	1.02749	0.958783	1.00308	0.97248	0.951619	1.00735	1.02489	0.966599	1.00548	0.968575	0.966553	51.4298	20.2658	115.105	83.2193	74.2209	69.9133	89.8408	64.7503	77.9449	86.3112	125.192	42.8913	47.6982	91.5825	52.8486	69.4952	82.3222	82.4744	78.6768	75.6172	48.4471	105.646	104.789	55.1016	49.9076
ARHGAP1	9.20866	9.5787	1.07714	0.959767	0.994552	0.98718	1.08407	1.0362	1.10492	1.03467	0.927405	1.03801	0.887472	1.03096	1.04911	0.999716	0.927257	1.02162	1.10792	1.0943	1.02271	0.992683	0.955902	1.01588	54.6978	14.8355	158.207	52.3343	73.5435	78.3702	95.2364	71.2034	153.424	84.2943	160.896	36.0818	119.683	55.3957	70.7309	84.2893	79.6795	50.2719	102.917	46.9822	95.032	73.9297	77.3294	48.6876	47.7112
DHRS3	8.42331	7.63763	1.04156	0.9535	1.03502	0.983702	1.11218	0.887389	1.0058	1.01174	0.906903	0.914477	0.937931	0.912928	0.870498	1.04191	1.00189	0.788944	0.907454	0.840568	0.971566	0.75082	0.920419	0.942724	41.3638	36.0502	102.113	231.732	80.4728	81.9076	76.0386	45.3814	55.8418	63.2376	162.487	57.668	92.3594	47.9087	44.1002	50.8799	26.7775	82.4542	36.0774	29.1794	70.5375	116.667	58.2232	19.1767	77.8142
MRPL54	9.00637	8.35187	0.910482	0.918421	0.979375	0.977432	1.00087	0.921504	1.05161	1.06938	0.988431	0.931895	1.05729	0.983195	0.947784	1.00178	1.01449	0.999386	0.892026	1.0076	0.998499	1.02985	0.937756	0.981859	47.0023	34.9558	103.647	72.3279	56.9733	59.7316	86.3012	70.0047	74.6314	87.1795	90.2023	59.9008	65.8594	58.1165	49.401	62.6761	46.9396	68.3614	58.3758	60.2651	109.027	63.4028	46.5945	67.6865	100.414
FAM83H	6.29271	7.08577	1.00146	0.973531	0.788053	0.912919	1.55952	1.33532	1.151	1.02239	0.99586	1.28841	0.938992	1.14927	1.28752	1.03498	1.09161	1.04934	1.06224	1.33602	1.06763	0.978077	1.20616	1.10621	76.4513	3.68195	84.8877	58.7635	169.469	81.5544	104.659	67.8427	154.645	50.5733	68.7679	2.3609	92.1248	51.301	81.4784	56.5717	48.7809	53.5167	145.275	40.3777	102.724	106.166	117.254	42.8244	64.2142
FLII	7.57161	7.57618	1.00619	0.945272	1.03321	0.935369	0.887133	1.00638	0.982939	1.08508	1.03193	0.991531	1.08961	1.03915	0.967359	1.03273	1.02073	0.973364	1.20369	0.8785	0.995272	0.818233	0.830189	0.988279	87.1084	14.8928	62.3587	71.0108	91.0105	71.1958	83.9078	67.9332	37.5237	31.677	81.8359	93.6766	86.728	56.6339	64.8519	57.8837	135.253	58.841	138.248	62.1104	120.506	87.0985	73.9046	48.5161	86.6094
RAD21	8.11254	8.41506	1.00803	1.07135	1.01165	1.11836	1.01668	1.03556	1.02431	1.00236	1.01945	0.969975	0.982135	1.02572	1.01654	1.00305	0.99725	1.0066	0.981719	1.05393	1.03932	1.00398	0.983759	1.0177	90.2756	15.149	127.762	39.8966	66.5532	49.1496	116.91	39.8442	107.123	77.2015	143.242	43.0452	87.7008	56.3346	36.7149	59.807	100.94	38.7251	121.53	46.4929	76.9875	57.0166	107.488	27.7936	131.423
PPP4R1	8.51701	9.17002	1.0669	0.991077	0.963073	0.984919	1.2857	1.10717	1.09955	1.01164	1.04574	1.08478	1.10728	1.1578	1.09199	1.02162	1.01066	1.02628	0.987739	1.14227	1.00152	0.992158	0.896661	1.05126	41.2832	4.06899	76.9479	56.6755	67.7299	97.4712	64.1916	67.4754	84.5127	57.4859	101.033	10.3474	90.3056	94.3042	76.0605	84.8802	74.8127	86.1008	155.245	41.0764	79.691	103.831	92.7657	55.9032	43.5034
PABPC4	9.67238	9.80962	1.04102	0.987314	1.06339	0.891092	0.877115	0.958242	1.00286	0.973209	0.964062	0.924763	0.864159	0.926252	0.931042	0.97505	0.97403	0.990503	1.02895	0.932488	1.0307	0.994243	0.971865	0.966778	79.8935	14.795	99.837	53.5839	37.5315	32.3658	97.3605	43.528	86.9341	64.463	85.7201	164.555	59.1324	35.5918	31.3764	45.6568	116.498	73.2844	96.1694	57.9083	103.051	82.6596	83.2428	28.9615	89.948
CDC25B	7.2147	7.90696	1.01813	1.10121	1.00157	1.0891	1.09595	1.06569	1.12497	1.10223	1.09929	1.12201	0.929636	1.06434	1.04968	1.01072	0.971604	1.12105	1.07872	1.07621	1.14527	1.16393	0.966268	1.06655	98.1238	1.29784	53.7317	16.4012	52.1646	28.6528	269.781	37.0222	148.657	53.0091	77.0365	8.10069	118.011	33.752	32.513	58.8202	332.418	55.4189	248.637	51.4749	93.4839	66.0568	129.88	87.6148	139.289
BAX	6.71973	6.98185	1.05763	1.06837	1.0115	1.1031	1.09061	1.05115	1.05278	0.943954	1.13453	1.02111	1.30667	1.07335	1.09131	1.02158	1.06573	1.07075	1.06184	1.14284	1.05492	1.11914	1.23554	1.08469	99.9069	5.64289	112.628	59.3504	78.7843	43.7935	114.309	62.2909	125.788	69.3283	130.776	15.4204	114.667	38.7259	55.3058	46.0121	80.877	49.7211	94.2501	37.6498	88.8094	77.8805	89.15	44.0313	109.091
PFDN6	7.54096	7.65465	0.948019	1.06647	1.01555	0.984619	1.04844	1.05272	1.04656	0.972868	1.06588	0.982701	1.00024	1.03419	0.996079	1.04451	1.01717	1.05365	0.950788	1.05318	1.02292	1.07102	1.03715	1.02213	93.6805	15.7776	87.72	76.5698	88.5654	54.6036	138.309	67.871	118.881	79.2584	107.767	32.7591	64.8196	54.7907	50.0249	54.0104	163.14	76.1224	106.109	67.7294	51.297	94.9273	89.8319	64.2789	70.4992
MAPKAPK2	7.5116	7.71553	1.0421	1.04095	1.06493	1.07352	0.9212	1.00398	1.05652	1.0147	0.923245	0.996395	1.09365	1.01699	0.972778	0.999134	1.00103	1.0435	0.939051	1.06132	1.06206	1.07208	1.16405	1.02682	108.358	15.6079	95.8068	62.6159	102.452	51.1906	231.918	57.696	55.8197	69.1758	171.3	42.5803	80.8161	48.9364	44.7566	52.4961	79.7081	64.3153	99.5392	47.0015	91.4176	74.9262	119.319	44.3417	66.0482
DPM3	7.88823	7.6441	1.0178	0.960974	0.994979	1.05606	0.923597	0.971635	1.02144	1.00566	1.11829	0.959796	0.956009	0.993798	0.997143	0.983812	0.957787	0.886487	0.921082	0.996579	1.06593	0.973098	1.09821	0.993341	124.178	45.0476	92.4081	104.12	121.642	47.523	167.052	58.6935	47.1301	77.5793	67.0053	78.779	55.1299	33.2895	61.4668	72.9413	66.2509	56.2867	40.3038	47.3401	100.916	50.8876	41.7651	34.3585	66.4534
GLUD1	9.9278	9.55114	0.896904	0.95626	0.97469	0.975847	1.09121	0.99564	0.993682	1.0083	1.0228	0.979618	0.926501	1.0075	0.99266	1.01925	0.985259	0.937428	1.00659	1.01552	1.00127	0.978387	0.962629	0.987045	81.905	19.5653	74.8411	70.8061	112.657	70.7391	45.7413	63.4507	107.752	74.2829	109.032	35.9646	76.0713	83.4893	32.2307	55.1838	244.169	55.2263	139.26	57.1439	53.7113	90.9844	35.8683	48.7853	73.0091
C12orf62	7.38704	7.46739	1.05444	1.03398	1.10648	1.01762	0.829685	0.970822	0.980719	0.962917	1.14071	0.896696	0.934825	0.955756	0.850899	0.999323	1.01882	1.02872	0.929548	0.882965	1.00681	0.798927	0.77209	0.960607	65.0455	40.3846	81.5287	101.252	93.8648	53.8257	100.686	62.5256	78.8709	89.8764	105.401	118.982	63.22	50.6471	50.7763	56.8864	76.6002	77.0928	66.4326	79.7846	39.6548	57.9395	71.9621	53.064	112.781
UBAP2L	8.91543	8.2566	0.964323	0.957263	1.04106	0.924478	0.954026	1.01366	0.973811	1.02232	0.867934	0.989069	0.949283	1.01063	1.04084	0.982843	0.904931	0.930504	1.13425	0.974666	0.972731	0.996935	0.983559	0.980434	85.1932	10.6863	101.941	72.8729	107.622	54.7845	181.248	49.9057	85.9585	74.7943	124.891	36.9517	80.7708	54.9448	53.0146	62.8024	61.0459	61.0154	118.994	57.7441	85.9596	96.597	123.225	42.4593	74.5965
SRP68	9.14002	8.77656	0.959627	0.971138	1.00603	0.930087	0.960226	0.960275	0.956839	0.991699	1.08608	0.989042	0.984502	1.00075	0.971641	1.03916	1.03596	0.95833	0.989349	1.00181	0.998392	0.931216	0.885855	0.981333	91.7459	21.3007	81.0514	66.3828	68.8276	76.1872	87.5763	64.0802	86.3132	84.2952	99.5753	43.8454	68.7332	63.7373	64.5474	64.8778	84.0066	74.3186	80.3448	57.4429	114.91	104.501	112.525	44.6311	115.851
RPS19BP1	7.28441	7.29267	0.982466	0.987101	1.04806	1.0671	1.02508	0.957799	0.993962	0.980076	1.04739	1.00767	1.02518	0.993936	0.9732	0.987282	0.929007	0.997418	0.974143	0.977097	1.05487	1.04939	1.05681	1.00548	88.1696	41.1076	115.667	74.2942	73.0207	59.3951	102.788	51.6891	80.7689	78.5117	122.882	44.1813	74.928	44.4597	53.8467	63.5102	79.0463	70.1806	78.1355	46.2888	122.301	70.9889	78.5131	51.2662	62.1531
C20orf3	6.19407	7.03649	1.08983	1.11139	1.02294	1.19472	1.13851	1.13202	1.00155	1.42411	1.20428	1.06969	1.03638	1.06403	1.07136	1.01881	0.947602	1.13306	1.16121	1.11901	1.04653	1.21301	0.949915	1.10238	108.844	15.749	103.969	37.4749	85.5862	29.6216	82.4924	32.0805	67.5135	421.224	95.5825	22.7753	63.8512	26.9816	24.6806	39.0655	118.209	24.9362	118.795	23.2096	127.891	45.665	143.58	25.8946	195.053
VPS29	9.84188	9.31041	0.948459	1.00384	0.966225	0.997227	1.06485	0.908415	1.02972	1.02551	1.0206	0.982962	0.991513	1.0104	0.986745	1.04213	0.993607	0.9878	1.01348	1.00559	1.02457	1.00086	0.975845	0.999064	81.1538	18.5432	67.5535	55.2055	44.7702	68.9021	79.0193	74.6945	110.688	85.8469	111.429	45.8579	58.6388	80.2941	63.8158	71.8907	128.958	65.7014	90.5143	75.3232	89.2125	97.0822	102.667	66.2811	116.549
CHI3L1	6.18864	6.4099	1.42331	1.35004	1.1651	1.19614	1.03843	1.08402	1.09311	1.14021	0.95115	1.04906	1.18938	1.01747	1.02448	1.04454	0.892642	1.05275	1.06919	1.04884	1.04538	1.03629	1.04475	1.09316	747.021	2.87593	251.432	6.74113	8.53555	17.4792	74.6491	87.123	129.519	415.706	296.805	11.3973	41.657	13.054	17.9942	18.9191	30.5921	21.2014	81.479	15.719	7.91284	18.4899	83.1865	16.3837	5.41488
NCKAP1	7.22984	6.59488	1.01943	0.985134	0.946054	0.994664	1.07866	0.893972	1.05942	1.02874	1.00551	1.00154	0.741389	1.01281	1.04081	1.04355	1.00791	1.02753	1.01406	1.06361	0.998872	1.01046	0.899423	0.993978	69.6644	15.5663	86.9555	54.0997	165.882	71.3447	75.6204	63.4619	61.1369	76.8212	109.262	36.9848	57.257	84.4683	53.0899	68.8878	107.418	49.9931	101.531	63.0552	74.161	99.1765	88.1398	43.101	110.33
EPAS1	9.13998	9.02464	0.918121	1.04044	1.152	1.01299	0.953852	0.921936	1.05117	1.06304	0.98335	1.03754	0.812408	1.00451	0.930797	1.05508	0.945812	1.02931	1.05026	1.01046	1.05667	0.995344	0.855373	0.994308	84.6432	10.6709	134.686	148.443	48.8057	66.4287	114.292	63.4522	58.3015	118.479	169.457	65.1927	77.3923	14.7057	51.7046	169.658	82.901	41.2485	130.086	32.2967	102.737	110.881	125.093	29.1073	38.9833
FAM120A	10.0195	10.0078	0.953637	1.04334	1.04025	1.08922	1.01159	1.09509	1.0315	1.05227	0.93043	1.03708	0.857703	0.987029	0.992341	1.00743	0.957589	0.982534	1.07647	1.01977	1.01152	1.00041	0.887256	1.00307	90.739	20.6864	98.1938	88.6864	117.039	50.2492	89.2989	48.3358	117.331	76.5153	131.824	52.1222	81.3259	46.1025	45.9206	69.0498	165.631	52.7563	129.94	50.3403	105.237	96.023	101.549	36.0769	106.523
HES1	6.81889	7.27733	0.801037	0.955481	0.921786	0.962752	1.26263	1.04643	0.935443	1.01106	1.00972	1.00317	0.896056	1.04391	1.04759	1.01649	0.986597	0.949274	0.975027	1.08016	0.918808	0.969062	0.881983	0.984499	79.8968	14.3366	85.8265	90.2797	72.3177	98.5482	113.334	16.9044	70.1285	112.11	146.453	41.9689	45.3025	63.2035	54.011	54.5946	47.0877	181.473	35.0174	45.4346	82.3399	142.179	160.712	15.047	97.3015
AP1B1	7.23427	7.68832	0.996178	0.993461	0.984028	0.930746	1.1818	1.00885	0.999963	1.14166	1.03716	1.10999	1.00747	0.988337	1.07191	1.006	0.985208	1.06889	1.00398	1.05934	0.976076	0.820625	0.797187	1.00804	98.1972	17.24	78.3393	63.1821	68.2819	115.88	82.2512	111.931	82.1591	86.6702	93.8437	31.6283	100.221	81.0652	107.243	76.7947	73.2683	88.7293	76.1056	92.7527	99.4543	120.949	82.5965	92.5512	59.7307
TMPRSS11D	6.20164	5.87184	0.50351	0.957031	0.65971	0.908586	1.51477	1.10715	0.936958	0.63281	0.898444	0.712764	0.811751	0.957076	1.27594	1.08018	1.00234	0.894755	0.654409	1.16544	0.869472	0.916531	0.7521	0.914844	14.2752	0.0503454	89.013	19.9318	1.72122	170.814	31.0784	78.2101	31.5366	7.01425	93.9446	0.298998	147.079	308.795	201.621	162.027	1.37301	296.793	6.95626	220.447	13.2449	147.535	52.2008	195.541	23.3636
PGLS	7.71479	8.53324	0.941261	0.938338	0.956093	0.968113	1.15349	0.972484	0.99772	0.973678	1.03047	0.946369	0.960712	1.05132	1.10874	0.998583	1.03261	0.969058	0.937292	1.0353	1.00483	1.03339	1.06928	1.00377	104.005	23.5023	82.6797	83.7083	147.069	72.6265	84.456	80.8442	115.937	107.468	90.3147	26.9718	76.2094	51.4798	61.1158	57.5472	48.6083	58.117	60.4807	42.8826	152.292	85.9942	86.9416	61.1032	98.4127
FKBP4	7.99782	7.04273	0.835452	1.00888	0.96403	1.06842	1.04902	1.07446	1.00952	0.993695	1.05632	1.11613	0.944697	1.00151	1.03514	0.962993	0.997867	0.936565	0.979898	0.91671	1.02201	0.694144	0.853389	0.977183	58.3996	13.1509	40.7717	61.7755	154.751	70.5212	43.304	53.4154	88.3726	53.1472	87.6934	30.5855	52.811	61.1015	43.6291	41.1435	89.2405	104.557	68.1014	63.358	129.844	143.864	85.8242	55.0557	231.946
DSG1	6.41139	6.99675	0.703832	0.807809	0.639259	0.893311	1.17417	1.18346	1.05279	0.953001	1.0743	0.934635	0.90399	1.26324	1.10873	1.27161	0.975076	1.11972	0.849806	1.23026	0.989515	0.929533	0.759442	0.991309	22.7023	0.95181	9.92548	1.5719	27.7526	13.2241	1.5342	96.6763	85.7482	296.926	0.358086	0.142798	101.922	165.956	174.073	265.031	162.444	20.6469	108.77	332.562	1.75456	0.999392	0.131335	195.546	9.90641
SERBP1	8.89725	7.71389	0.878826	0.960488	0.938456	0.899124	0.915275	1.03088	0.976166	0.979455	0.999451	0.941522	0.726859	1.0334	1.01593	1.01477	0.948418	0.972839	0.911196	0.983548	0.983206	0.935428	0.816058	0.945776	76.0068	20.3431	88.0218	57.3331	48.9106	64.5033	72.7726	66.9353	125.4	94.4946	152.249	37.3113	75.007	77.7937	62.9974	73.1172	116.73	71.2548	123.521	80.603	107.516	123.541	82.1424	65.0809	70.6766
CKS1B	7.46199	8.07081	0.989484	1.13605	0.921446	1.24386	1.22485	0.975386	1.14683	1.03969	1.39439	0.911071	0.979181	1.0968	1.13598	1.10269	0.925882	0.838264	1.06618	1.10986	1.06073	1.0111	1.41409	1.08209	138.467	4.35666	54.5569	29.8197	115.327	31.181	326.571	34.07	94.062	53.7874	120.683	9.61607	43.422	40.0609	27.6806	43.2493	143.732	32.6414	122.24	37.3584	136.783	44.0132	138.838	32.6747	108.208
MYL6B	8.77968	8.24934	1.02171	0.85704	1.11695	0.770786	0.727778	0.939594	0.932118	0.997529	0.94441	0.889727	0.815118	0.890462	0.832975	0.990986	0.914289	0.906655	0.927387	0.81209	0.912919	0.966283	0.70769	0.898785	77.0384	10.032	64.45	29.7938	22.7638	28.5585	50.3287	48.6739	25.5758	67.9253	80.7405	145.458	45.0898	36.7818	23.967	27.6533	29.6023	82.355	75.724	139.707	36.2354	33.4701	100.211	56.5769	45.9629
AKR1B1	8.13104	7.40812	1.21562	1.03335	1.07019	0.948242	0.829559	0.876504	0.948372	1.10599	1.15379	0.913445	0.82878	0.984402	0.904958	0.998165	0.764507	1.02703	1.07901	0.895026	1.02953	1.06522	0.690121	0.96961	86.4093	12.0324	139.324	23.163	128.622	13.1873	93.0946	30.3078	45.3679	41.9773	86.9856	194.539	86.6661	20.4158	93.9879	27.0321	104.583	56.5817	57.3678	71.2952	110.123	17.3914	74.6018	17.982	171.11
MRPL21	8.17247	8.41771	0.992412	1.10209	0.968695	1.16786	0.944806	1.06365	0.963348	0.947611	1.01693	1.10343	0.880457	0.990044	0.955823	1.02026	0.993232	0.997299	0.981157	0.953347	1.03363	1.03594	1.06587	1.00847	114.795	45.4755	90.7395	46.8184	237.234	45.9961	83.3782	45.8802	94.3643	83.4215	75.5095	64.261	51.6003	53.2598	28.1936	32.7173	199.64	58.8106	76.5959	51.4495	128.892	61.2311	66.4887	50.7734	115.781
CHPF	7.33654	6.94469	1.2215	1.08563	1.14241	1.13949	0.969571	1.25509	1.01487	1.37131	0.980472	1.32907	0.875138	1.15302	1.22741	0.947821	0.839053	1.17326	1.22873	1.16111	1.10593	0.983475	0.671084	1.08931	101.706	22.6101	203.328	59.5153	154.232	33.4234	74.6749	30.7926	154.63	40.2162	65.1247	27.6522	119.445	17.069	30.3262	48.7543	118.997	23.0467	90.448	18.3343	366.054	50.7706	80.5454	35.3009	93.0768
MAGED2	6.50103	6.34142	1.04473	1.00967	1.03312	0.998885	0.97896	0.968813	0.990941	0.896649	1.20465	0.971386	0.886653	1.02154	1.00847	1.01074	1.04865	1.19045	0.866587	0.987053	1.01572	1.24369	1.00917	1.01841	118.703	41.5051	141.876	173.605	119.001	39.2201	56.9858	43.1728	50.6998	88.4781	116.18	103.178	107.116	45.2035	36.1249	92.0092	43.5567	37.663	64.5593	50.9799	102.559	40.1487	121.603	39.2604	77.9993
CD46	7.69753	6.75134	1.05924	0.98983	0.970006	1.08177	1.16065	0.834027	1.03392	0.73844	1.00215	1.02959	0.991059	0.965689	1.1309	1.04043	0.995199	0.934944	1.08074	1.10857	1.03228	0.921869	0.854379	0.99789	83.9199	46.5687	61.5903	69.5696	174.623	80.1034	175.473	36.2793	87.4627	59.5584	132.187	47.9184	49.1557	66.1968	55.3021	79.903	105.193	67.2839	78.6827	24.5501	73.3064	129.739	137.298	17.2585	96.9342
TNFRSF21	9.33234	10.343	1.03458	1.02249	1.06595	1.08952	1.3168	1.03879	1.068	1.10036	0.936453	1.13555	0.810131	1.13706	1.07203	1.03981	0.94411	1.01648	1.09657	1.20565	1.02164	0.990062	0.977038	1.05329	32.6936	4.2322	78.5373	135.285	42.015	33.8083	64.0173	73.9358	83.799	12.1348	244.012	22.8961	128.208	47.6744	26.5606	51.4872	138.541	142.665	200.771	22.0705	92.4637	78.8738	131.031	32.707	12.6915
NUMA1	7.61478	7.12813	1.02169	0.930514	1.01193	0.907115	0.934738	1.01792	0.942323	0.999133	0.978679	1.02186	0.964506	0.956893	0.932008	0.960527	1.11338	1.02612	1.04438	0.940706	0.958742	0.750838	0.857056	0.965288	109.833	24.3406	92.6093	91.6074	37.0879	83.0475	126.95	84.1289	63.6714	115.4	85.1368	57.8923	91.5085	64.8572	64.3016	73.9193	92.3768	64.9844	105.178	65.2925	114.632	81.3929	74.4585	32.1245	74.2545
CKB	6.86177	6.45763	0.921801	0.813228	1.00207	0.99597	0.861423	0.964713	0.832961	1.02136	1.36571	1.11629	0.788745	1.06388	0.78988	1.05373	0.848247	1.13939	1.03933	0.793375	1.08028	0.760492	0.750305	0.952532	109.575	48.6041	75.6334	211.852	46.9361	31.3736	9.64376	16.1516	10.2546	85.6007	68.9367	183.318	49.5503	37.3576	19.318	73.1703	216.833	50.1144	165.031	143.228	191.142	22.2181	108.614	33.5336	58.2063
ALDH3B2	6.25966	6.72156	1.00233	1.23572	0.758273	0.784063	1.40656	0.98667	0.971364	0.95254	1.04361	1.06046	1.00747	0.996489	1.20336	1.01731	1.01145	1.02818	0.740531	1.17975	0.946856	1.08038	1.18084	1.0283	80.5613	17.7696	36.3034	42.7784	76.7799	177.879	99.7038	101.359	84.2873	237.592	17.2576	1.30488	70.5601	97.9756	231.054	169.766	54.185	100.503	41.7058	85.52	46.1521	163.533	88.7711	55.1303	52.7337
RBMX	8.40431	7.63918	0.959656	1.0285	0.967979	1.02464	0.986734	0.913064	0.991166	0.824531	0.978878	0.89334	0.669999	0.988585	0.984475	0.985081	1.03436	1.04173	0.952495	0.951061	0.993462	1.02755	0.918099	0.957876	98.8597	17.8221	93.2869	68.2627	91.5946	47.0915	150.234	64.2948	84.2751	105.721	190.345	42.8345	62.192	56.5644	38.6651	61.7863	58.8475	62.087	100.946	53.6051	69.9204	63.432	123.238	49.8006	142.307
DAP3	8.86164	8.82404	1.03108	1.04668	1.00879	1.02112	1.02487	0.969033	0.98712	1.12234	1.08582	0.914948	1.07151	1.00585	0.987727	1.02972	0.990513	1.00738	1.07196	1.03039	1.02039	1.03294	1.147	1.02891	104.907	23.4178	83.2738	62.4933	116.034	47.3739	222.815	51.2369	93.1841	94.0178	96.6756	44.3451	54.2201	50.7926	40.995	64.653	86.3602	48.4424	71.316	47.8947	116.016	71.5205	81.2988	46.7198	169.784
DULLARD	7.83054	7.22966	1.0367	1.04053	1.02394	0.971935	0.925854	1.04731	0.976402	0.984563	1.07334	0.849158	1.14361	1.00343	0.940718	1.03626	0.930626	1.00679	0.989426	0.942761	0.998657	0.729125	0.818282	0.974734	112.711	20.0591	106.998	68.8432	77.8135	53.6808	93.1399	63.3799	90.7834	89.2645	100.823	77.821	102.02	47.5549	54.9903	52.4392	142.792	80.1451	112.815	73.0214	102.167	73.2062	59.9062	44.9607	109.877
SERINC1	8.33856	8.16795	1.05239	0.985357	1.04099	0.994084	0.907745	0.964595	0.979539	0.983992	1.02022	0.863103	0.979111	1.01285	0.977258	1.0064	0.924825	0.946051	0.971497	1.15699	0.981944	0.991268	0.7851	0.977396	57.0818	35.299	148.391	60.7889	104.437	51.3067	55.2838	68.8403	83.0314	127.065	127.481	110.881	89.1301	56.1669	39.3417	73.3067	101.29	53.1359	123.02	63.0092	98.2052	59.4654	125.515	40.1197	90.0088
POLR2A	6.96395	7.27237	0.92845	0.98387	1.00051	0.985172	1.09144	1.04887	0.984869	1.53269	1.0679	1.06217	1.09879	1.04086	1.03142	0.974062	0.977538	1.08333	1.04039	0.968887	0.999143	0.737111	0.952445	1.02809	102.189	8.54048	88.3497	68.4103	104.341	87.9826	85.7548	76.2705	81.4664	85.2598	124.172	30.6552	123.396	68.1082	70.0964	80.3126	127.433	57.4655	120.61	58.9647	110.99	98.1425	75.0962	50.288	96.9266
BCL2L1	8.87712	8.86551	1.01168	0.997347	0.959679	0.961096	1.06923	1.06454	0.977536	0.936048	0.992823	0.969386	1.11687	1.04258	0.982713	1.01911	1.05939	1.07512	0.97754	0.932866	1.03908	1.03712	0.973247	1.00929	77.4556	13.4413	83.151	125.525	54.1413	91.2974	92.79	47.5089	57.4177	65.147	146.754	36.6654	77.2109	54.5993	61.39	71.933	258.624	68.5458	442.843	53.6471	113.786	78.8011	76.7639	33.9457	76.9799
KLF6	9.46417	9.45094	0.887197	0.955137	1.03392	0.981395	1.0242	0.99901	1.04036	0.996184	0.954972	0.99881	1.01754	1.10076	1.0035	0.935866	1.00161	1.00751	1.02056	1.0495	0.993445	1.0429	0.976321	1.00099	37.2716	7.56388	55.9224	52.2817	36.296	108.849	26.478	228.042	45.2652	142.506	125.539	27.3519	64.4925	70.1253	49.8443	59.012	32.9736	96.231	136.039	42.4093	38.0389	77.2466	61.4494	106.62	24.29
KLK5	6.04272	6.19826	1.36011	1.24357	0.792515	0.771391	1.6666	1.28511	1.07055	1.40053	1.31909	1.11668	1.1583	1.4491	1.29411	1.25501	1.31479	0.951389	1.46259	1.4093	1.14776	0.942255	1.4548	1.23169	117.608	4.05788	46.0783	3.48743	0.433987	59.3549	3.66479	8.18485	73.2626	180.759	0.656954	1.56662	205.68	25.0385	146.224	156.795	928.38	5.10981	68.083	48.7609	69.8323	1.09061	35.2022	16.4898	0.472597
M6PR	7.74629	8.55513	1.02628	1.07076	0.999772	1.1133	1.16399	0.967989	1.003	1.08929	0.936169	1.13736	0.96561	0.997292	1.01601	1.02978	0.983379	0.968591	1.11936	1.02756	1.03491	1.00014	0.986401	1.03033	127.562	22.7822	92.5181	68.2919	69.0369	44.3624	40.2397	48.3531	99.6106	73.5566	117.945	29.591	80.9528	47.0792	39.8832	60.1369	111.996	53.6648	115.152	43.3687	110.259	87.4368	118.727	40.7947	116.441
UBR4	8.43111	8.52137	0.955531	0.992731	1.01968	1.01331	0.995776	0.996067	0.972301	0.904414	0.992633	0.937222	1.0687	1.03341	0.986589	1.02816	1.00833	1.05523	0.893806	0.986064	1.0187	1.03631	0.875677	0.989078	77.7709	12.9709	80.5499	87.3865	68.2961	71.1318	107.351	67.7975	75.0299	100.636	101.45	42.8687	81.1157	46.2901	60.9902	75.5572	92.8613	79.1015	74.4463	66.9538	113.202	85.3312	103.238	54.3829	78.2738
TXNRD1	6.56299	7.18843	1.17142	1.12143	1.10683	1.19215	0.927612	0.945478	0.98507	1.23091	1.11888	0.977154	1.17419	1.01654	0.896584	1.04192	1.03897	0.987538	1.09317	0.936594	1.092	1.02071	0.977106	1.05011	250.623	5.14093	62.9958	179.37	212.847	14.6122	30.4968	21.7107	39.6889	44.493	102.34	45.4036	23.7122	16.5285	70.6683	36.8068	70.2916	33.7842	53.1228	15.3889	383.592	19.1458	58.6319	10.0012	471.974
STARD7	9.41186	9.07721	0.979722	1.049	1.00869	0.987205	0.87663	0.940352	0.964443	1.06867	1.09251	1.05577	0.972974	0.93859	0.912859	1.05001	0.98178	0.958584	1.02711	0.947623	1.00199	1.06058	0.989751	0.993565	141.683	29.9786	73.6131	56.6321	105.93	37.3626	154.15	47.462	77.6479	82.6135	128.64	86.0033	63.6585	45.0867	67.7595	66.3379	86.555	56.3653	72.8395	58.4886	130.362	72.2372	65.1564	39.7181	134.42
ASNA1	6.14343	6.15545	0.989706	0.966759	0.981872	1.0094	1.00437	1.08525	1.0454	1.0496	0.988338	0.99535	0.982177	0.996867	0.996642	1.00561	0.940824	1.09771	1.0276	1.08803	1.00373	1.0372	0.965079	1.01226	122.245	20.3805	93.648	71.8497	99.806	67.8269	98.1418	70.2711	89.2011	91.6491	131.713	46.1197	82.633	58.6039	60.6346	64.6103	70.4437	64.522	102.967	66.9831	95.1731	75.2355	84.3124	66.0481	84.6111
CXCL10	6.54665	6.9503	0.826175	1.8637	1.02686	1.20029	1.50505	1.22268	1.02428	1.10685	1.09143	1.17728	1.11325	0.917802	1.19433	1.3196	0.985516	1.21789	1.2367	1.44173	1.27262	1.18758	1.20037	1.19676	9.85699	3.83413	79.5408	7.75758	6.02445	3.04931	92.5509	17.3335	1258.04	2.84907	151.806	0.86972	762.256	48.9564	51.8814	80.0178	2.416	11.0989	624.652	102.856	0.258928	1.24722	148.877	4.23826	2.60584
COMT	6.79935	6.54284	1.0009	0.951883	0.944418	1.0028	1.16709	1.11499	1.04822	0.990126	1.2118	1.06238	0.838448	1.09384	1.06052	0.981657	1.06268	1.0703	0.992982	1.06565	0.962922	0.768703	0.852426	1.01165	220.939	26.6488	97.7922	49.9808	113.448	57.5219	244.793	74.7504	127.686	98.7437	80.7217	35.8187	80.8873	51.4644	76.3322	50.9343	82.8905	79.352	86.2052	57.9357	132.24	82.0367	124.184	50.4224	65.1984
IL1F6	5.93735	5.86406	1.00857	0.765344	0.736878	0.718444	0.998465	0.877818	0.942568	0.527435	0.773	0.745829	0.821179	0.836029	1.04095	1.10241	0.997148	1.29563	0.655309	0.77941	0.658743	0.965807	0.875203	0.86296	7.864	0	0.458571	18.0781	0.168366	403.888	0.226991	4.05473	0.173633	0.104553	0.240386	0.642402	21.6042	773.355	78.3634	82.8127	0.563999	226.658	8.98908	286.272	2.51188	59.0278	0	113.895	0.107157
MRPL24	9.09629	7.70208	0.915067	0.961822	1.02668	0.961841	0.904971	1.01127	0.966789	0.934669	1.05956	0.954292	0.85108	1.01255	0.972231	1.00972	1.04591	1.02105	1.00217	0.934046	1.00763	1.01921	0.813951	0.970786	70.1288	27.8117	70.4509	65.5229	137.292	49.5219	290.321	60.466	87.9239	81.3636	71.4062	75.443	45.4859	51.9269	45.2573	45.1795	83.7858	59.8338	75.0216	64.8723	91.5964	74.6806	74.7511	51.3332	94.8488
GARS	9.7718	10.1084	0.992362	1.06802	0.990575	1.00617	1.07789	1.01022	1.06604	0.99924	0.986777	1.09578	1.06367	1.04867	1.08407	1.02559	1.08409	1.02373	1.0351	1.08949	1.03483	1.00593	0.978879	1.03653	75.444	9.53122	99.1975	38.4365	101.123	69.2668	81.3651	70.3215	84.5437	71.895	88.8766	25.8244	61.6928	55.7489	67.5317	68.731	56.5098	46.4454	76.1017	59.1116	120.679	121.534	63.066	74.3449	308.754
[truncated: 1,497 more rows]
[truncated: 105 more columns]
